# Supplementary material for: Agrobacterium tumefaciens Type IV and Type VI Secretion Systems Reside in Detergent-Resistant Membranes
Source: Front Microbiol. 2021 Nov 25;12:754486. doi: 10.3389/fmicb.2021.754486 (PMC8656257; doi:10.3389/fmicb.2021.754486)
Supplement: Supplementary file 2 [file Table_1.XLSX]

## Sheet: LB medium
Accession	Gene name(s)	Annotation	Ratio [DRM/DSM]	sig95%	t-test
A8WFE1	Atu8019	Uncharacterized protein	DRM only	0	0.219603
A9CEK4	Atu3032	Uncharacterized protein	1.21591	0	0.795527
A9CEK6	Atu3038	ABC transporter, nucleotide binding/ATPase protein (Dipeptide)	DRM only	0	0.308644
A9CEK8	Atu3041	ABC transporter, substrate binding protein (Dipeptide)	DSM only	0	0.210768
A9CEU3	Atu3191	Outer membrane protein	113.007	0	0.14676
A9CEU8	Atu3202	Efflux pump membrane transporter	DRM only	0	0.185098
A9CEW7	Atu3239	ABC transporter, substrate binding protein (Sugar)	DRM only	0	0.389372
A9CEX8	Atu3259	Dehydrogenase	DSM only	0	0.0775236
A9CEY0	Atu3262	ABC transporter, nucleotide binding/ATPase protein	DSM only	0	0.207831
A9CEZ4	Atu3300	Aminotransferase	DSM only	0	0.133741
A9CF08	Atu3331	YkuD domain-containing protein	DRM only	0	0.0563802
A9CF11	thuE Atu3338	ABC transporter, substrate binding protein (Trehalose/maltose)	DSM only	0	0.191677
A9CF13	thuK Atu3341	ABC transporter, nucleotide binding/ATPase protein (Trehalose/maltose)	DSM only	0	0.653434
A9CF14	thuA Atu3342	Trehalose utilization-related protein	DSM only	0	0.102404
A9CF18	Atu3347	Uncharacterized protein	DSM only	0	0.0813173
A9CF24	Atu3354	Pyrroloquinoline-quinone-dependent quinate dehydrogenase	DRM only	0	0.213424
A9CF25	Atu3356	NADP-dependent malic enzyme	DSM only	0	0.331615
A9CF30	Atu3364	D-amino acid dehydrogenase	DRM only	1	0.00508103
A9CF35	Atu3370	ABC transporter, membrane spanning protein (Sugar)	DRM only	0	0.416393
A9CF36	Atu3372	ABC transporter, substrate binding protein (Sugar)	DSM only	0	0.102404
A9CF53	Atu3396	ABC transporter, substrate binding protein (Iron)	DSM only	1	0.0341097
A9CF98	bkdA2 Atu3472	2-oxoisovalerate dehydrogenase beta subunit	1.07179	0	0.879857
A9CF99	bkdA1 Atu3473	2-oxoisovalerate dehydrogenase subunit alpha (EC 1.2.4.4) (Branched-chain alpha-keto acid dehydrogenase E1 component alpha chain)	1.83109	0	0.465293
A9CFA1	Atu3475	Acetyl-CoA C-acetyltransferase	DSM only	0	0.273346
A9CFA2	Atu3476	Transcriptional regulator, AsnC family	DSM only	0	0.115539
A9CFA3	acd Atu3477	Acyl-CoA dehydrogenase	0.160517	0	0.304331
A9CFB1	Atu3495	GGDEF family protein	DRM only	1	0.00750207
A9CFD4	Atu3546	Uncharacterized protein	DRM only	1	0.0128947
A9CFE7	xylF Atu3576	ABC transporter, substrate binding protein (Xylose)	DSM only	0	0.313277
A9CFF1	etfB Atu3595	Electron transfer flavoprotein beta subunit	0.165557	1	0.00070513
A9CFF2	hbdA Atu3597	3-hydroxybutyryl-CoA dehydrogenase	DRM only	1	0.0421082
A9CFG1	plsC Atu3609	1-acyl-sn-glycerol-3-phosphate acyltransferase	DRM only	0	0.051879
A9CFG6	cobT Atu3621	Cobyrinic acid synthase	DRM only	0	0.140641
A9CFG7	cobS Atu3622	Cobalamin biosynthesis protein	1.81817	0	0.549192
A9CFH2	Atu3640	Uncharacterized protein	DSM only	0	0.678536
A9CFI6	Atu3672	Polyketide synthase, siderophore biosynthesis protein	DSM only	0	0.343351
A9CFI8	Atu3676	Putative siderophore biosynthesis protein	DSM only	0	0.207603
A9CFJ1	Atu3682	Non-ribosomal peptide synthetase, siderophore biosynthesis protein	DSM only	1	0.0227164
A9CFK0	serA Atu3706	D-3-phosphoglycerate dehydrogenase (EC 1.1.1.95)	1.47203	0	0.539389
A9CFK1	serC Atu3707	Phosphoserine transaminase (EC 2.6.1.52)	DSM only	0	0.160513
A9CFK9	tktA Atu3736	Transketolase (EC 2.2.1.1)	DSM only	0	0.159862
A9CFL0	gapA Atu3737	Glyceraldehyde-3-phosphate dehydrogenase (EC 1.2.1.-)	0.164818	1	0.011122
A9CFL1	Atu3740	Fructose-bisphosphate aldolase (EC 4.1.2.13)	0.386651	0	0.0646171
A9CFL3	Atu3744	ABC transporter, nucleotide binding/ATPase protein	DRM only	1	0.0368869
A9CFL5	suhB Atu3748	Inositol-1-monophosphatase (EC 3.1.3.25)	DSM only	1	0.0467155
A9CFL8	purE Atu3754	N5-carboxyaminoimidazole ribonucleotide mutase (N5-CAIR mutase) (EC 5.4.99.18) (5-(carboxyamino)imidazole ribonucleotide mutase)	DSM only	0	0.199166
A9CFM1	pykA Atu3762	Pyruvate kinase (EC 2.7.1.40)	DSM only	0	0.272684
A9CFM2	Atu3764	Sigma 54 dependent transcriptional activator	1.54965	0	0.0908025
A9CFM4	Atu3768	Homospermidine synthase	DSM only	1	0.0173112
A9CFM5	Atu3772	PHB domain-containing protein	5.02562	1	0.0418833
A9CFM6	Atu3773	NfeD domain-containing protein	DRM only	0	0.23418
A9CFM8	galU Atu3778	UTP--glucose-1-phosphate uridylyltransferase (EC 2.7.7.9) (UDP-glucose pyrophosphorylase)	DSM only	0	0.282665
A9CFM9	mltB Atu3779	Lytic murein transglycosylase	DSM only	0	0.207603
A9CFN2	ald Atu3785	L-threonine aldolase (EC 4.1.2.48)	DSM only	0	0.258133
A9CFN7	Atu3795	AcrB/AcrD/AcrF family protein	DRM only	0	0.132091
A9CFN8	Atu3796	Efflux protein	DRM only	0	0.0658469
A9CFN9	Atu3797	HlyD family secretion protein	DRM only	1	0.013991
A9CFP0	proV Atu3802	ABC transporter, nucleotide binding/ATPase protein (Proline/glycine betaine)	DRM only	0	0.326049
A9CFP4	mdeA Atu3806	Methionine gamma-lyase	DSM only	0	0.1946
A9CFR1	Atu3832	Uncharacterized protein	DRM only	0	0.319079
A9CFS2	lldA Atu3871	L-lactate dehydrogenase	DRM only	0	0.729402
A9CFT7	glpD Atu3897	Glycerol-3-phosphate dehydrogenase (EC 1.1.5.3)	DRM only	0	0.243854
A9CFU1	Atu3913	Biotin carboxylase	DSM only	0	0.230625
A9CFV8	Atu3967	ABC transporter, substrate binding protein (Sugar)	DSM only	0	0.258133
A9CFY2	idhA Atu4012	Myo-inositol 2-dehydrogenase	DSM only	0	0.293255
A9CFY8	Atu4026	Uncharacterized protein	3.10664	0	0.0713784
A9CFZ2	Atu4032	ABC transporter, nucleotide binding/ATPase protein (Sugar)	1.2353	0	0.72283
A9CFZ3	Atu4033	ABC transporter, substrate binding protein (Sugar)	0.398124	1	0.0416326
A9CFZ8	Atu4046	ABC transporter, substrate binding protein (Glycine betaine)	DSM only	0	0.0653725
A9CFZ9	exoP Atu4049	Exopolysaccharide polymerization/transport protein	DRM only	0	0.230858
A9CG08	soxA Atu4069	Sarcosine oxidase subunit alpha (EC 1.5.3.1)	DSM only	1	0.0366218
A9CG09	soxG Atu4070	Sarcosine oxidase gamma subunit	DSM only	0	0.199166
A9CG13	glgP Atu4078	Alpha-1,4 glucan phosphorylase (EC 2.4.1.1)	1.40528	0	0.641055
A9CG19	cydC Atu4090	ABC transporter, nucleotide binding/ATPase protein	DRM only	0	0.264591
A9CG20	cydA Atu4091	Cytochrome d oxidase	6.93367	0	0.0634442
A9CG21	cydB Atu4092	Cytochrome d oxidase subunit II	DRM only	0	0.183536
A9CG22	Atu4094	DUF3597 domain-containing protein	DSM only	0	0.183504
A9CG31	dppA Atu4113	ABC transporter, substrate binding protein (Dipeptide)	0.0776495	0	0.148739
A9CG32	dppB Atu4114	ABC transporter, membrane spanning protein (Dipeptide)	DRM only	0	0.237413
A9CG33	dppC Atu4115	ABC transporter, membrane spanning protein (Dipeptide)	DRM only	0	0.185384
A9CG34	dppD Atu4116	ABC transporter, nucleotide binding/ATPase protein (Dipeptide)	0.458208	0	0.467412
A9CG35	dppF Atu4117	ABC transporter, nucleotide binding/ATPase protein (Dipeptide)	1.11041	0	0.855929
A9CG47	gcd Atu4135	Glucose dehydrogenase	DRM only	1	0.013991
A9CG59	putA Atu4157	Bifunctional protein PutA [Includes: Proline dehydrogenase (EC 1.5.5.2) (Proline oxidase); Delta-1-pyrroline-5-carboxylate dehydrogenase (P5C dehydrogenase) (EC 1.2.1.88) (L-glutamate gamma-semialdehyde dehydrogenase)]	2.21046	0	0.126517
A9CG65	nspC Atu4169	Carboxynorspermidine/carboxyspermidine decarboxylase (CANS DC/CAS DC) (CANSDC/CASDC) (EC 4.1.1.96)	DSM only	0	0.293669
A9CG66	Atu4170	Uncharacterized protein	DRM only	0	0.268211
A9CG67	deaD Atu4171	Cold-shock dead-box protein A	DSM only	0	0.136895
A9CG68	lysC Atu4172	Aspartokinase (EC 2.7.2.4)	DSM only	0	0.446227
A9CG69	ptsI Atu4173	Phosphoenolpyruvate--protein phosphotransferase (EC 2.7.3.9)	DSM only	1	0.0404475
A9CG80	Atu4208	ABC transporter, substrate binding protein (Sugar)	DSM only	0	0.199553
A9CGB5	Atu4258	ABC transporter, membrane spanning protein (Oligopeptide)	DRM only	0	0.23459
A9CGB6	Atu4259	ABC transporter, substrate binding protein (Oligopeptide)	DSM only	0	0.269923
A9CGE7	soxB Atu4310	Sarcosine oxidase beta subunit	DSM only	0	0.895794
A9CGF3	rbsB Atu4320	ABC transporter, substrate binding protein (Ribose)	DSM only	0	0.225674
A9CGF5	rdh Atu4323	Ribitol 2-dehydrogenase	DSM only	0	0.9891
A9CGF8	bexD Atu4329	Polysaccharide export protein	3.38922	0	0.23083
A9CGF9	impL Atu4332	IcmF family protein	DRM only	0	0.0502409
A9CGG0	impJ Atu4334	Uncharacterized protein	0.323005	0	0.183025
A9CGG1	impI Atu4335	Putative forkhead-type phosphopeptide-binding protein	DSM only	0	0.184565
A9CGG3	impG Atu4337	Uncharacterized protein	DSM only	0	0.330825
A9CGG5	impC Atu4341	Uncharacterized protein	2.79487	0	0.0790107
A9CGG6	impB Atu4342	Uncharacterized protein	DSM only	0	0.139753
A9CGG7	impA Atu4343	ImpA_N domain-containing protein	DRM only	0	0.232685
A9CGG8	Atu4345	Uncharacterized protein	2.33621	0	0.302912
A9CGH0	vgrG Atu4348	VgrG protein	1.41656	0	0.719795
A9CGK7	Atu4400	Ferrienterobactin-like protein	DRM only	1	0.00506242
A9CGL6	napC Atu4410	Cytochrome c-type protein	DRM only	0	0.168064
A9CGL8	gcdH Atu4418	Glutaryl-CoA dehydrogenase	DSM only	0	0.342768
A9CGM8	Atu4431	ABC transporter, substrate binding protein (Oligopeptide)	DSM only	0	0.102602
A9CGM9	Atu4432	ABC transporter, membrane spanning protein (Oligopeptide)	DRM only	0	0.206349
A9CGN1	Atu4434	ABC transporter, nucleotide binding/ATPase protein (Oligopeptide)	DRM only	0	0.156326
A9CGN2	Atu4435	ABC transporter, nucleotide binding/ATPase protein (Oligopeptide)	DRM only	0	0.467509
A9CGN3	Atu4438	ABC transporter, substrate binding protein (Oligopeptide)	DSM only	0	0.225655
A9CGR2	Atu4501	ANAPC4_WD40 domain-containing protein	DSM only	0	0.143764
A9CGR3	cobW Atu4502	Cobalamin synthesis protein	DRM only	0	0.620979
A9CGR6	Atu4507	Dehydrogenase	DSM only	1	0.0369056
A9CGS0	iolD Atu4511	Acetolactate synthase	DSM only	0	0.2974
A9CGS1	iolC Atu4512	Myo-inositol catabolism IolC protein	DSM only	0	0.280757
A9CGS5	Atu4522	Uncharacterized protein	DSM only	0	0.322398
A9CGS6	Atu4524	ABC transporter, membrane spanning protein (Oligopeptide)	DRM only	1	0.00224367
A9CGS7	Atu4525	ABC transporter, substrate binding protein (Oligopeptide)	0.102159	0	0.11694
A9CGS8	Atu4526	ABC transporter, nucleotide binding/ATPase protein	1.39895	0	0.531357
A9CGT7	iolH Atu4553	Myo-inositol catabolism protein	DSM only	0	0.280757
A9CGU9	Atu4586	Choloylglycine hydrolase family protein	DSM only	0	0.0653489
A9CGV0	Atu4587	Uncharacterized protein	DRM only	0	0.218419
A9CGV8	Atu4600	ABC transporter, nucleotide binding/ATPase protein	DRM only	0	0.247516
A9CGW2	Atu4608	Glyco_trans_2-like domain-containing protein	DSM only	0	0.280757
A9CGW4	Atu4610	Sugar nucleotide epimerase/dehydratase	DRM only	0	0.372659
A9CGW6	rfbD Atu4616	dTDP-4-dehydrorhamnose reductase (EC 1.1.1.133)	DRM only	0	0.214774
A9CGW7	rffB Atu4617	dTDP-glucose 4,6-dehydratase (EC 4.2.1.46)	DRM only	1	0.00224367
A9CGX5	Atu4634	Uncharacterized protein	DRM only	0	0.366882
A9CGX9	oxyR Atu4641	Transcriptional regulator, LysR family	DRM only	0	0.319079
A9CGY3	betC Atu4648	Choline sulfatase	DSM only	0	0.183504
A9CGZ1	Atu4666	HlyD family secretion protein	DRM only	0	0.132961
A9CGZ5	Atu4678	ABC transporter, substrate binding protein (Amino acid)	DSM only	0	0.225343
A9CGZ9	dadA Atu4682	D-amino acid dehydrogenase, small subunit	DRM only	0	0.350364
A9CH21	Atu4732	Fimbrial chaperone	0.460813	0	0.201666
A9CH59	Atu4809	Glycosyltransferase	DRM only	0	0.319079
A9CH67	Atu4822	Fatty acid CoA ligase	DRM only	0	0.247554
A9CH73	zwf Atu4835	Glucose-6-phosphate 1-dehydrogenase (G6PD) (EC 1.1.1.49)	DSM only	0	0.281036
A9CH87	Atu4859	Uncharacterized protein	DSM only	0	0.730278
A9CHA0	Atu4876	Putative oxidoreductase	DSM only	0	0.162197
A9CHB1	rho Atu2833	Transcription termination factor Rho (EC 3.6.4.-) (ATP-dependent helicase Rho)	0.097156	1	0.0012565
A9CHC1	cobW Atu2805	Cobalamin synthesis protein	1.21843	0	0.693724
A9CHD1	Atu2783	Acetyltransferase	DSM only	0	0.183504
A9CHD3	phbA Atu2769	Acetyl-CoA acetyltransferase poly-beta-hydroxybutyrate biosynthesis	DSM only	0	0.061572
A9CHD5	gdh Atu2766	Glutamate dehydrogenase (EC 1.4.1.2)	0.10412	0	0.212299
A9CHD6	Atu2765	Transcriptional regulator, CarD family	DSM only	0	0.188138
A9CHD7	mtrA Atu2763	Two component response regulator	DSM only	1	0.0467155
A9CHE0	Atu2760	Uncharacterized protein	DSM only	1	0.0418397
A9CHE3	Atu2755	Putative 2-octaprenyl-6-methoxyphenol	DRM only	0	0.0682895
A9CHE4	mgpS Atu2753	ATP-dependent helicase	0.125215	1	0.000474081
A9CHE8	Atu2749	Uncharacterized protein	DRM only	0	0.0882412
A9CHG1	pycA Atu2726	Pyruvate carboxylase (EC 6.4.1.1)	0.300567	0	0.148656
A9CHG4	ompA Atu2722	Porin	DRM only	0	0.166834
A9CHH3	ccmG Atu2690	Thiol:disulfide interchange protein	DRM only	0	0.212029
A9CHH4	ccmC Atu2688	Heme exporter protein C (Cytochrome c-type biogenesis protein)	DRM only	0	0.187746
A9CHH6	acnA Atu2685	Aconitate hydratase (Aconitase) (EC 4.2.1.3)	DSM only	0	0.0549352
A9CHH9	Atu2682	Uncharacterized protein	DRM only	0	0.185384
A9CHI3	Atu2670	ABC transporter, nucleotide binding/ATPase protein	DRM only	1	0.0401318
A9CHI8	typA bipA Atu2663	50S ribosomal subunit assembly factor BipA (EC 3.6.5.-) (GTP-binding protein BipA)	DSM only	0	0.636235
A9CHJ8	sdhA Atu2643	Succinate dehydrogenase flavoprotein subunit (EC 1.3.5.1)	1.2287	0	0.755723
A9CHJ9	sdhB Atu2642	Succinate dehydrogenase iron-sulfur subunit (EC 1.3.5.1)	2.63754	0	0.249325
A9CHK0	sucD Atu2637	Succinate--CoA ligase [ADP-forming] subunit alpha (EC 6.2.1.5) (Succinyl-CoA synthetase subunit alpha) (SCS-alpha)	0.180506	1	0.00530558
A9CHK1	sucA Atu2636	Alpha-ketoglutarate dehydrogenase (EC 1.2.4.2)	0.144823	1	0.0468359
A9CHK2	sucB Atu2635	Dihydrolipoyllysine-residue succinyltransferase component of 2-oxoglutarate dehydrogenase complex (EC 2.3.1.61) (2-oxoglutarate dehydrogenase complex component E2)	0.45864	0	0.0748615
A9CHK4	lpdA Atu2632	Dihydrolipoyl dehydrogenase (EC 1.8.1.4)	DSM only	0	0.186318
A9CHK6	Atu2614	Gly-zipper_Omp domain-containing protein	DRM only	0	0.370382
A9CHL4	malE Atu2601	ABC transporter, substrate binding protein (Maltose)	DSM only	0	0.108002
A9CHL5	malK Atu2600	ABC transporter, nucleotide binding/ATPase protein (Maltose/maltodextrin)	DRM only	0	0.214552
A9CHM1	Atu2586	ABC transporter, nucleotide binding/ATPase protein (Oligopeptide)	DRM only	0	0.384274
A9CHM4	Atu2579	Metal dependant beta lactamase protein	DSM only	0	0.154378
A9CHM5	Atu2577	ABC transporter, nucleotide binding/ATPase protein	DRM only	0	0.0879567
A9CHN6	Atu2551	Efflux pump membrane transporter	DRM only	0	0.194769
A9CHP9	dppA Atu2518	ABC transporter, substrate binding protein (Dipeptide)	0.0688579	0	0.10938
A9CHQ0	dppB Atu2517	ABC transporter, membrane spanning protein (Dipeptide)	DRM only	0	0.186895
A9CHQ1	dppC Atu2516	ABC transporter, membrane spanning protein (Dipeptide)	DRM only	0	0.232685
A9CHQ2	dppD Atu2515	ABC transporter, nucleotide binding/ATPase protein (Dipeptide)	DRM only	0	0.0998794
A9CHQ3	dppF Atu2514	ABC transporter, nucleotide binding/ATPase protein (Dipeptide)	DRM only	0	0.113955
A9CHR4	pntB Atu2494	NAD(P) transhydrogenase subunit beta (EC 7.1.1.1) (Nicotinamide nucleotide transhydrogenase subunit beta)	DRM only	0	0.206529
A9CHR5	pntA Atu2493	NAD(P) transhydrogenase subunit alpha (EC 7.1.1.1)	DRM only	0	0.110543
A9CHR6	Atu2489	SLT_2 domain-containing protein	0.441868	0	0.254312
A9CHR8	pdxK Atu2487	Pyridoxal kinase (EC 2.7.1.35)	DSM only	0	0.15571
A9CHS8	Atu2471	Uncharacterized protein	DRM only	0	0.148735
A9CHT0	Atu2469	Uncharacterized protein	0.233063	0	0.190972
A9CHT2	purU Atu2464	Formyltetrahydrofolate deformylase (EC 3.5.1.10) (Formyl-FH(4) hydrolase)	DSM only	1	0.0200254
A9CHT3	Atu2463	META domain-containing protein	DSM only	0	0.234211
A9CHU3	Atu2446	Uncharacterized protein	DRM only	0	0.051879
A9CHU7	Atu2440	Uncharacterized protein	DRM only	0	0.256024
A9CHV0	ctrA Atu2434	Two component response regulator	DRM only	0	0.334191
A9CHV5	Atu2424	ABC transporter, nucleotide binding/ATPase protein	1.77088	1	0.0312175
A9CHW2	Atu2410	ABC transporter, nucleotide binding/ATPase protein (Urea/amide)	DSM only	0	0.281036
A9CHW8	Atu2393	Acr family transporter	DRM only	1	0.0326721
A9CHZ2	Atu2340	TGc domain-containing protein	DSM only	0	0.968982
A9CHZ3	Atu2339	Alpha-E domain-containing protein	11.4449	0	0.0901178
A9CHZ4	Atu2338	Uncharacterized protein	0.759977	0	0.758857
A9CHZ5	Atu2336	YkuD domain-containing protein	DRM only	0	0.0644758
A9CHZ6	Atu2335	Uncharacterized protein	DRM only	0	0.20071
A9CHZ8	Atu2333	ATP-dependent RNA helicase	DRM only	0	0.4055
A9CI21	Atu2301	TPR_21 domain-containing protein	DRM only	0	0.191857
A9CI26	trpE(G) Atu2289	Anthranilate synthase (EC 4.1.3.27)	DSM only	1	0.00960234
A9CI31	Atu2284	Uncharacterized protein	DRM only	1	0.0386338
A9CI32	Atu2279	ABC transporter, nucleotide binding/ATPase protein (Proline/glycine betaine)	3.15415	1	0.00456691
A9CI34	braC Atu2276	ABC transporter, substrate binding protein (Branched chain amino acid)	0.0633405	1	0.027483
A9CI42	Atu2257	Uncharacterized protein	DRM only	0	0.0590674
A9CI43	moxR Atu2253	MoxR family protein	DSM only	0	0.197701
A9CI51	fbcB Atu2238	Cytochrome b	DRM only	0	0.108791
A9CI55	Atu2228	GGDEF family protein	DRM only	0	0.515874
A9CI66	cspA Atu2200	Cold shock protein	DSM only	0	0.144746
A9CI70	aatA Atu2196	Aminotransferase (EC 2.6.1.-)	DSM only	0	0.518392
A9CI78	Atu2175	Uncharacterized protein	DRM only	1	0.028018
A9CI81	Atu2165	Bacteriophytochrome protein	DSM only	0	0.549952
A9CI83	Atu2163	Uncharacterized protein	DSM only	0	0.218014
A9CI89	Atu2150	ABC transporter, nucleotide binding/ATPase protein	0.675292	0	0.668299
A9CI90	Atu2147	ABC transporter, substrate binding protein	DSM only	0	0.118254
A9CI92	glnA Atu2142	Glutamine synthetase	DSM only	0	0.396837
A9CI95	parA Atu2136	Chromosome partitioning protein	DSM only	0	0.280757
A9CIA7	murF Atu2098	UDP-N-acetylmuramoyl-tripeptide--D-alanyl-D-alanine ligase (EC 6.3.2.10) (D-alanyl-D-alanine-adding enzyme)	DSM only	1	0.0274981
A9CIB1	ftsZ2 ftsZ Atu2086	Cell division protein FtsZ	3.11693	0	0.255731
A9CIC0	sco1 Atu2073	Membrane protein	DRM only	0	0.16587
A9CIC1	Atu2070	Aminopeptidase P	DSM only	0	0.90803
A9CIC9	hflC Atu2044	Protein HflC	10.343	1	0.0038264
A9CIE1	Atu2015	Aminotransferase	DSM only	0	0.861173
A9CIF8	nusG Atu1961	Transcription termination/antitermination protein NusG	4.83245	0	0.234643
A9CIG1	rpsN Atu1933 AGR_C_3535	30S ribosomal protein S14	0.173184	0	0.192317
A9CIH4	Atu1893	Uncharacterized protein	DRM only	0	0.185384
A9CIH8	Atu1885	Transcriptional regulator, AsnC family	DSM only	0	0.26999
A9CII3	Atu1879	ABC transporter, substrate binding protein (Amino acid)	DSM only	0	0.175933
A9CII4	Atu1877	OmpA family protein	DSM only	0	0.166591
A9CII8	icdA Atu1870	Isocitrate dehydrogenase [NADP] (EC 1.1.1.42)	0.446213	0	0.232963
A9CII9	Atu1862	AAA domain-containing protein	DRM only	0	0.319079
A9CIJ6	Atu1847	Uncharacterized protein	DRM only	0	0.185384
A9CIJ9	purB Atu1841	Adenylosuccinate lyase (ASL) (EC 4.3.2.2) (Adenylosuccinase)	DSM only	0	0.183752
A9CIK4	Atu1833	ATP-dependent RNA helicase	DSM only	1	0.025161
A9CIL3	Atu1810	Uncharacterized protein	DSM only	0	0.685359
A9CIL5	cspA Atu1803	Cold shock protein	DSM only	0	0.162441
A9CIL9	Atu1799	Uncharacterized protein	DRM only	0	0.306582
A9CIM2	ubiH Atu1794	2-octaprenyl-6-methoxyphenol hydroxylase	1.9347	0	0.534533
A9CIM4	Atu1792	ABC transporter, nucleotide binding/ATPase protein (Sugar)	DSM only	0	0.741286
A9CIN4	Atu1775	Polyketide biosynthesis associated protein	DSM only	0	0.207831
A9CIN7	glnA Atu1770	Glutamine synthetase (EC 6.3.1.2)	0.011654	0	0.0630902
A9CIQ2	Atu1730	Usp domain-containing protein	2.34843	0	0.177826
A9CIQ4	pcm Atu1721	L-isoaspartyl protein carboxyl methyltransferase (Protein L-isoaspartyl methyltransferase) (Protein-L-isoaspartate O-methyltransferase) (Protein-beta-aspartate methyltransferase)	DSM only	1	0.0473904
A9CIR3	tatC Atu1704	Sec-independent protein translocase protein TatC	DRM only	0	0.185384
A9CIR7	kefB Atu1693	Glutathione-regulated potassium-efflux system protein	DRM only	1	0.00224367
A9CIS0	ppiD Atu1686	Parvulin-like PPIase (Peptidyl-prolyl cis-trans isomerase plp) (Rotamase plp)	6.23661	1	0.0125409
A9CIS4	ppiB Atu1679	Peptidyl-prolyl cis-trans isomerase (PPIase) (EC 5.2.1.8)	DSM only	0	0.275987
A9CIS7	adhC Atu1670	S-(hydroxymethyl)glutathione dehydrogenase (EC 1.1.1.284)	DSM only	0	0.133016
A9CIT3	maeB Atu1652	NADP-dependent malic enzyme	DSM only	0	0.196046
A9CIT7	Atu1645	ABC transporter, substrate binding protein	DRM only	0	0.051879
A9CIT8	Atu1644	ABC_trans_aux domain-containing protein	DRM only	0	0.141897
A9CIU3	kefA Atu1633	Potassium efflux system KEFA	DRM only	0	0.21877
A9CIU8	gyrB parE Atu1622	DNA topoisomerase 4 subunit B (EC 5.6.2.2) (Topoisomerase IV subunit B)	1.36275	0	0.677972
A9CIU9	Atu1621	DLH domain-containing protein	DSM only	0	0.184565
A9CIV1	Atu1615	Uncharacterized protein	DSM only	0	0.0904659
A9CIV3	dhs Atu1610	Phospho-2-dehydro-3-deoxyheptonate aldolase (EC 2.5.1.54)	DRM only	0	0.37908
A9CIV5	map Atu1606	Methionine aminopeptidase (MAP) (MetAP) (EC 3.4.11.18) (Peptidase M)	0.246602	1	0.0287923
A9CIW1	Atu1595	NADPH:quinone reductase	DSM only	0	0.106547
A9CIW5	Atu1580	ABC transporter, nucleotide binding/ATPase protein (Amino acid)	3.76909	0	0.0568755
A9CIW6	Atu1579	ABC transporter, membrane spanning protein (Amino acid)	DRM only	0	0.0912396
A9CIW7	Atu1578	ABC transporter, membrane spanning protein (Amino acid)	DRM only	0	0.105568
A9CIW8	Atu1577	ABC transporter, substrate binding protein (Amino acid)	0.117673	0	0.0580095
A9CIW9	metC Atu1575	Cystathionine beta lyase	DSM only	1	0.0440704
A9CIX0	nah Atu1574	Salicylate hydroxylase	DRM only	1	0.0080583
A9CIX2	cyc Atu1569	Cytochrome P450	0.391444	0	0.314086
A9CIX5	yajC Atu1563	Sec translocon accessory complex subunit YajC	DRM only	0	0.183504
A9CIY7	fixO Atu1536	Cytochrome C oxidase, FixO chain	13.832	1	0.0303915
A9CIY8	fixP Atu1534	Cbb3-type cytochrome c oxidase subunit	16.1039	0	0.0628485
A9CIY9	fixG Atu1530	Nitrogen fixation protein FixG	5.89705	1	0.0493889
A9CIZ2	gntZ Atu1526	6-phosphogluconate dehydrogenase, decarboxylating (EC 1.1.1.44)	DSM only	0	0.151378
A9CIZ3	Atu1525	Uncharacterized protein	0.354706	0	0.274777
A9CJ09	Atu1480	Alkyl hydroperoxide reductase C (Peroxiredoxin) (Thioredoxin peroxidase)	DSM only	1	0.0403827
A9CJ17	Atu1468	DUF1775 domain-containing protein	0.0894378	1	0.0318638
A9CJ23	ntrX Atu1448	Two component response regulator	3.32657	1	0.00291694
A9CJ30	lpdA Atu1434	Dihydrolipoyl dehydrogenase (EC 1.8.1.4)	DSM only	0	0.163094
A9CJ32	pdhB Atu1430	Pyruvate dehydrogenase E1 component subunit beta (EC 1.2.4.1)	0.324367	0	0.111205
A9CJ53	cisY Atu1392	Citrate synthase	DSM only	0	0.188737
A9CJ59	lpxB Atu1386	Lipid-A-disaccharide synthase (EC 2.4.1.182)	1.21144	0	0.777416
A9CJ61	omp1 bamA Atu1381	Outer membrane protein assembly factor BamA	100.254	1	0.0348573
A9CJ66	clpA Atu1364	ATP-dependent Clp protease, ATP-binding subunit	0.76487	0	0.671099
A9CJ70	Atu1351	Uncharacterized protein	DSM only	0	0.215224
A9CJ72	Atu1348	Uncharacterized protein	0.413066	0	0.58883
A9CJ77	mrcA Atu1341	DD-transpeptidase (EC 2.4.1.129) (EC 3.4.16.4) (Penicillin-binding protein 1A) (Penicillin-insensitive transglycosylase) (Penicillin-sensitive transpeptidase) (Peptidoglycan TGase)	25.8303	1	0.0481762
A9CJ78	fabG Atu1338	3-oxoacyl-(Acyl carrier protein) reductase	DSM only	0	0.144746
A9CJ82	accB Atu1331	Biotin carboxyl carrier protein of acetyl-CoA carboxylase	DSM only	1	0.00806445
A9CJ83	accC Atu1330	Biotin carboxylase (EC 6.3.4.14) (EC 6.4.1.2)	1.24954	0	0.788528
A9CJ84	Atu1327	NADH-ubiquinone oxidoreductase	21.5218	0	0.235952
A9CJ89	Atu1311	Acetyltransferase	DSM only	0	0.207603
A9CJ90	acd Atu1310	Acyl-CoA dehydrogenase	DSM only	0	0.186878
A9CJ93	topA Atu1304	DNA topoisomerase 1 (EC 5.6.2.1) (DNA topoisomerase I)	0.143906	0	0.174501
A9CJ94	rnr Atu1303	Ribonuclease R (RNase R) (EC 3.1.13.1)	DSM only	0	0.0899856
A9CJ99	dnaE Atu1292	DNA polymerase III subunit alpha (EC 2.7.7.7)	DRM only	0	0.247554
A9CJA0	Atu1289	ABC transporter, membrane spanning protein	DRM only	0	0.205897
A9CJA2	nuoM Atu1282	NADH dehydrogenase I chain M	DRM only	0	0.216623
A9CJA3	nuoL Atu1281	NADH:ubiquinone reductase (H(+)-translocating) (EC 7.1.1.2)	DRM only	1	0.0362395
A9CJA5	nuoJ Atu1279	NADH-quinone oxidoreductase subunit J (EC 7.1.1.-)	DRM only	0	0.239933
A9CJA6	nuoF Atu1275	NADH-quinone oxidoreductase subunit F (EC 7.1.1.-)	DSM only	1	0.00787196
A9CJA7	nuoE Atu1274	NADH ubiquinone oxidoreductase chain E	0.131516	1	0.0110294
A9CJA9	nuoD Atu1272 AGR_C_2346	NADH-quinone oxidoreductase subunit D (EC 7.1.1.-) (NADH dehydrogenase I subunit D) (NDH-1 subunit D)	DRM only	0	0.189827
A9CJB1	nuoC Atu1270 AGR_C_2342	NADH-quinone oxidoreductase subunit C (EC 7.1.1.-) (NADH dehydrogenase I subunit C) (NDH-1 subunit C)	DRM only	0	0.12549
A9CJB2	nuoB Atu1269 AGR_C_2341	NADH-quinone oxidoreductase subunit B (EC 7.1.1.-) (NADH dehydrogenase I subunit B) (NDH-1 subunit B)	2.09973	0	0.395927
A9CJB4	hupA Atu1262	Histone-like protein	DSM only	0	0.199553
A9CJB5	lon Atu1261	Lon protease (EC 3.4.21.53) (ATP-dependent protease La)	0.523124	0	0.373603
A9CJB9	cysD Atu1251	O-acetylhomoserine sulfhydrylase	DSM only	0	0.354968
A9CJC4	exoP Atu1239	Exopolysaccharide production protein	DRM only	1	0.0186268
A9CJC5	gumB Atu1238	Polysaccharide export protein	DRM only	0	0.185384
A9CJD0	cysK Atu1217	Cysteine synthase	DSM only	0	0.207831
A9CJD2	Atu1215	Thiosulfate sulfurtransferase	DSM only	0	0.97545
A9CJD4	cpdB Atu1210	2',3'-cyclic-nucleotide 2'-phosphodiesterase/3'-nucleotidase (EC 3.1.3.6) (EC 3.1.4.16)	DSM only	0	0.415203
A9CJD5	Atu1209	Transcriptional regulator, LysR family	DSM only	0	0.269416
A9CJF0	Atu1164	Uncharacterized protein	DSM only	1	0.0227164
A9CJF1	mucS Atu1163	Exopolysaccharide II synthesis transcriptional activator ExpG	DRM only	0	0.185384
A9CJF3	parC Atu1158	DNA topoisomerase 4 subunit A (EC 5.6.2.2) (Topoisomerase IV subunit A)	0.123994	1	0.0241722
A9CJF4	Atu1157	Uncharacterized protein	DRM only	0	0.902464
A9CJF9	ppx Atu1145	Exopolyphosphatase (EC 3.6.1.11)	DSM only	0	0.188134
A9CJG4	Atu1132	Glutathione S-transferase related protein	DSM only	0	0.225133
A9CJG5	pgsA Atu1128	Phosphatidylglycerophosphate synthase	DRM only	0	0.212029
A9CJH2	ostA lptD Atu1106	LPS-assembly protein LptD	DRM only	0	0.0759055
A9CJH3	Atu1105	Uncharacterized protein	0.30051	1	0.00307631
A9CJH7	fabG Atu1095	3-oxoacyl-[acyl-carrier-protein] reductase (EC 1.1.1.100)	DSM only	0	0.115785
A9CJI0	dnaC Atu1084	Replicative DNA helicase (EC 3.6.4.12)	DRM only	1	0.00855196
A9CJK6	sipf Atu1034	Signal peptidase I (EC 3.4.21.89)	DRM only	1	0.00203564
A9CJK9	Atu1021	Porin	20.0791	1	0.0275532
A9CJL0	Atu1020	Porin	9.12574	1	0.00189023
A9CJL8	Atu0994	Electron transfer flavoprotein-ubiquinone oxidoreductase (ETF-QO) (EC 1.5.5.1)	DRM only	1	0.0325227
A9CJM8	dop Atu0977	Periplasmic serine endoprotease DegP-like (EC 3.4.21.107)	DSM only	0	0.437974
A9CJN0	cycH Atu0973	CycH protein	DRM only	0	0.239933
A9CJN1	Atu0971	Histidine kinase (EC 2.7.13.3)	DRM only	0	0.472947
A9CJP2	Atu0950	Uncharacterized protein	DRM only	0	0.191295
A9CJP4	Atu0946	Dehydrogenase	0.727812	0	0.55843
A9CJP7	Atu0937	Copper transporting ATPase	DRM only	0	0.199935
A9CJQ2	Atu0926	DUF1214 domain-containing protein	DRM only	0	0.306582
A9CJQ7	ros Atu0916	Transcriptional regulator	DSM only	0	0.183504
A9CJR6	Atu0904	Universal stress protein	3.40384	0	0.300942
A9CJS8	Atu0882	Uncharacterized protein	DRM only	0	0.114411
A9CJS9	sodBI Atu0876	Superoxide dismutase (EC 1.15.1.1)	DSM only	0	0.256888
A9CJT6	Atu0860	DUF853 domain-containing protein	0.531126	1	0.0117159
A9CJV2	Atu0813	Uncharacterized protein	DRM only	0	0.210627
A9CJV6	Atu0800	Thioredoxin domain-containing protein	DSM only	0	0.208111
A9CJW4	Atu0788	Uncharacterized protein	DRM only	0	0.112449
A9CJW7	Atu0784	Uncharacterized protein	DRM only	0	0.104006
A9CJW9	Atu0779	Glutathione-dependent peroxiredoxin (EC 1.11.1.27)	DSM only	0	0.183504
A9CJX1	surf1 Atu0773	SURF1-like protein	DRM only	0	0.11315
A9CJX9	fabI Atu0757	Enoyl-[acyl-carrier-protein] reductase [NADH] (EC 1.3.1.9)	DSM only	0	0.833967
A9CJZ1	Atu0736	Hemolysin	DSM only	0	0.379864
A9CJZ5	Atu0728	Lectin-like protein BA14k	0.431705	0	0.237231
A9CK01	atpF1 Atu0717 AGR_C_1301	ATP synthase subunit b 1 (ATP synthase F(0) sector subunit b 1) (ATPase subunit I 1) (F-type ATPase subunit b 1) (F-ATPase subunit b 1)	5.45865	0	0.246516
A9CK02	atpC atpE Atu0715	ATP synthase subunit c (ATP synthase F(0) sector subunit c) (F-type ATPase subunit c) (F-ATPase subunit c) (Lipid-binding protein)	0.725284	0	0.682846
A9CK03	atpB Atu0714 AGR_C_1295	ATP synthase subunit a (ATP synthase F0 sector subunit a) (F-ATPase subunit 6)	3.18723	0	0.408264
A9CK11	kdtA Atu0695	3-deoxy-D-manno-octulosonic acid transferase (Kdo transferase) (EC 2.4.99.12) (Lipid IV(A) 3-deoxy-D-manno-octulosonic acid transferase)	1.35215	0	0.66621
A9CK14	Atu0690	Uncharacterized protein	DRM only	0	0.366882
A9CK15	rluB Atu0689	Pseudouridine synthase (EC 5.4.99.-)	DSM only	1	0.0272513
A9CK28	Atu0662	Transcriptional regulator, GntR family	DSM only	0	0.18462
A9CK37	Atu0650	Uncharacterized protein	DRM only	1	0.0186268
A9CK38	cfa Atu0649	Cyclopropane-fatty-acyl-phospholipid synthase	0.400626	0	0.161695
A9CK39	glyS Atu0644 AGR_C_1144	Glycine--tRNA ligase beta subunit (EC 6.1.1.14) (Glycyl-tRNA synthetase beta subunit) (GlyRS)	DSM only	0	0.20562
A9CK41	Atu0641	Uncharacterized protein	DRM only	0	0.18375
A9CK47	adhP Atu0626	Alcohol dehydrogenase	1.10059	0	0.682321
A9CK50	potG potA Atu0610	Spermidine/putrescine import ATP-binding protein PotA (EC 7.6.2.11)	2.26705	0	0.309944
A9CK51	potF Atu0609	Putrescine-binding periplasmic protein	DSM only	0	0.160507
A9CK55	ordL Atu0601	Oxidoreductase	DRM only	1	0.0230201
A9CK57	aglK Atu0595	ABC transporter, nucleotide binding/ATPase protein	0.798113	0	0.225453
A9CK58	aglG Atu0593	ABC transporter, membrane spanning protein	DRM only	0	0.161886
A9CK59	aglE Atu0591	ABC transporter, substrate binding protein (Alpha-glucoside)	DSM only	0	0.0680779
A9CK67	flgK Atu0575	Flagellar hook-associated protein 1	DRM only	0	0.319079
A9CK75	luxR Atu0524	Transcriptional regulator, LuxR family	DSM only	0	0.296549
A9CK82	Atu0502	Acetyl-CoA acetyltransferase	DRM only	0	0.925198
A9CK85	pyrD Atu0486 AGR_C_861	Dihydroorotate dehydrogenase (quinone) (EC 1.3.5.2) (DHOdehase) (DHOD) (DHODase) (Dihydroorotate oxidase)	DRM only	1	0.00235245
A9CKA0	Atu0436	DNA helicase (EC 3.6.4.12)	DSM only	0	0.225343
A9CKA6	pstC Atu0421	Phosphate transport system permease protein	DRM only	0	0.22358
A9CKA7	Atu0420	ABC transporter, substrate binding protein (Phosphate)	DSM only	1	0.0137344
A9CKA8	Atu0418	Polyphosphate:ADP phosphotransferase (EC 2.7.4.1) (Polyphosphate kinase PPK2)	DRM only	0	0.523852
A9CKB2	fadD Atu0405	Long-chain-fatty-acid-CoA-ligase	0.453173	1	0.0425547
A9CKC3	hspC Atu0375	Small heat shock protein	DSM only	0	0.225674
A9CKC8	metK Atu0362	Methionine adenosyltransferase (EC 2.5.1.6)	1.81293	0	0.360621
A9CKD1	Atu0353	Acetyltransferase	DRM only	0	0.185384
A9CKD6	Atu0340	SAM dependent methyltransferase	DSM only	0	0.0653489
A9CKD7	Atu0339	Uncharacterized protein	DRM only	0	0.190719
A9CKD8	sppA Atu0337	Proteinase IV	DRM only	0	0.215432
A9CKD9	Atu0333	Lipopolysaccharide export system ATP-binding protein LptB	6.61129	0	0.0912304
A9CKE1	aarF Atu0319	Ubiquinone biosynthesis protein	4.52846	0	0.149516
A9CKE4	cysK Atu0312	Cysteine synthase (EC 2.5.1.47)	DSM only	1	5.32311e-05
A9CKE7	ugpA Atu0305	ABC transporter, substrate binding protein (Sn-glycerol 3-phosphate)	DSM only	0	0.281036
A9CKF2	Atu0293	Glutathione S-transferase	DSM only	0	0.183504
A9CKF6	sun Atu0289	Sun protein	DSM only	0	0.121455
A9CKG8	ampS Atu0274	Aminopeptidase	DSM only	0	0.231791
A9CKH4	Atu0263	Oxidoreductase	DSM only	0	0.23472
A9CKH7	infC Atu0254	Translation initiation factor 3	DSM only	0	0.190229
A9CKH9	Atu0251	Rubrerythrin domain-containing protein	DRM only	0	0.180199
A9CKI0	Atu0249	ABC transporter, substrate binding protein (Sugar)	DSM only	0	0.801115
A9CKI9	Atu0236	Uncharacterized protein	DRM only	0	0.185384
A9CKK0	Atu0214	Leucine aminopeptidase	DSM only	1	0.0379987
A9CKK4	mmsA Atu0205	Methylmalonate-semialdehyde dehydrogenase	DSM only	0	0.339741
A9CKK9	Atu0197	ABC transporter, nucleotide binding/ATPase protein (Proline/glycine/betaine)	DRM only	0	0.264728
A9CKL2	Atu0190	ABC transporter, nucleotide binding/ATPase protein (Peptide)	1.18299	0	0.797926
A9CKL4	Atu0187	ABC transporter, substrate binding protein (Peptide)	DSM only	0	0.191677
A9CKL5	mepA Atu0186	Penicillin-insensitive murein endopeptidase	DSM only	0	0.251712
A9CKN3	Atu0143	MFS permease	DRM only	0	0.404356
A9CKN4	cyoB Atu0141	Cytochrome O ubiquinol oxidase subunit I	6.24291	0	0.0580155
A9CKN9	Atu0126	Membrane lipoprotein	0.126553	0	0.21682
A9CKP5	polA Atu0110	DNA polymerase I (EC 2.7.7.7)	DSM only	0	0.343351
A9CKQ3	mltB Atu0092	Lytic murein transglycosylase	DSM only	0	0.154378
A9CKQ5	nusA Atu0089	Transcription termination/antitermination protein NusA	DSM only	0	0.188251
A9CKQ7	pnp Atu0082 AGR_C_124	Polyribonucleotide nucleotidyltransferase (EC 2.7.7.8) (Polynucleotide phosphorylase) (PNPase)	0.0668406	1	0.0354269
A9CKQ9	Atu0077	D-isomer specific 2-hydroxyacid dehydrogenases family protein	DSM only	0	0.127573
A9CKR5	frcA Atu0065	ABC transporter, nucleotide binding/ATPase protein (Sugar)	DRM only	0	0.179513
A9CKR7	frcB Atu0063	ABC transporter, substrate binding protein (Sugar)	DSM only	0	0.125469
A9CKS0	actR Atu0050	Two component response regulator	DSM only	0	0.158679
A9CKS1	Atu0048	YkuD domain-containing protein	DRM only	0	0.0639701
A9CKS2	Atu0046	Uncharacterized protein	DSM only	1	0.00114616
A9CKS6	Atu0027	Histidine kinase (EC 2.7.13.3)	DRM only	1	0.0466253
A9CKT0	accD Atu0020 AGR_C_32	Acetyl-coenzyme A carboxylase carboxyl transferase subunit beta (ACCase subunit beta) (Acetyl-CoA carboxylase carboxyltransferase subunit beta) (EC 2.1.3.15)	2.11456	0	0.0941858
A9CKT2	depA Atu0015	Intracellular PHB depolymerase	DRM only	0	0.187532
A9CKT3	hpcE Atu0014	2-hydroxyhepta-2,4-diene-1,7-dioate isomerase	DSM only	0	0.186974
A9CKT5	gyrB Atu0012	DNA gyrase subunit B (EC 5.6.2.2)	2.80518	1	0.0358086
A9CKW2	Atu6101	Helicase, SNF2 family	DSM only	0	0.343351
A9CKY8	Atu6063	Oxidoreductase, GMC family	DRM only	0	0.195942
A9CL33	Atu5516	Uncharacterized protein	DSM only	0	0.183504
A9CL84	Atu5415	Flavin_Reduct domain-containing protein	DRM only	0	0.366882
A9CLE3	Atu5299	Uncharacterized protein	0.535651	0	0.288786
A9CLE4	Atu5297	Hydrolase	DSM only	0	0.243622
A9CLE5	Atu5296	Arylester hydrolase	0.178753	1	0.00361377
A9CLF9	Atu5274	Transcriptional regulator, AraC family	DSM only	0	0.183504
A9CLG3	Atu5270	Permease component of C4 dicarboxylate transporter	DRM only	0	0.199164
A9CLG4	Atu5269	Permease component of C4 dicarboxylate transporter	DRM only	0	0.0504929
A9CLG5	dctP Atu5268	ABC transporter, substrate binding protein	0.33237	1	0.0305002
A9CLM6	attC Atu5129	ABC transporter, substrate binding protein (Mannopine)	DSM only	0	0.28952
A9CLM7	atrC Atu5123	Acetolactate synthase	0.0750447	1	0.0108811
A9CLM9	Atu5119	Two component response regulator	2.18322	0	0.581354
A9CLN0	Atu5118	Aminotransferase, class II	0.85096	0	0.826808
A9CLQ4	dppA Atu5071	ABC transporter, substrate binding protein (Dipeptide)	DSM only	0	0.245068
A9CLQ7	Atu5068	ABC transporter, nucleotide binding/ATPase protein (Oligopeptide)	DRM only	0	0.352429
B2C8K3	ftsZ	Cell division protein FtsZ (Fragment)	DRM only	0	0.306582
B6EF75	recA	Protein RecA (Recombinase A) (Fragment)	DRM only	0	0.210627
K0Q587		Uncharacterized protein	DRM only	0	0.241611
O05176	gguA xylG_1 AGTUEHA105_LOCUS2005 SY94_2204	Sugar ABC transporter, ATP-binding protein (EC 3.6.3.17) (Sugar transporter) (Xylose import ATP-binding protein XylG)	2.37812	0	0.361704
O30542	accC	AccC	DSM only	0	0.207603
O66165	tiorf19 repA CFBP7129_30435 CG010_026995	Plasmid partitioning protein RepA (RepA) (Tiorf19 protein)	DSM only	0	0.460138
P0A331	ftsA Atu2087 AGR_C_3785	Cell division protein FtsA	DSM only	1	0.0352991
P0A3B5	efp chvH Atu2553 AGR_C_4625	Elongation factor P (EF-P)	0.109615	1	0.0375732
P0A3F2	glgA1 glgA Atu4075 AGR_L_1562	Glycogen synthase 1 (EC 2.4.1.21) (Starch [bacterial glycogen] synthase 1)	0.38101	0	0.126617
P0A4E3	rpoA Atu1923 AGR_C_3518	DNA-directed RNA polymerase subunit alpha (RNAP subunit alpha) (EC 2.7.7.6) (RNA polymerase subunit alpha) (Transcriptase subunit alpha)	0.221366	1	0.0189199
P25548	chvE Atu2348 AGR_C_4267	Multiple sugar-binding periplasmic receptor ChvE	DSM only	0	0.050491
P30779	groL groEL mopA Atu0682 AGR_C_1220	60 kDa chaperonin (GroEL protein) (Protein Cpn60)	0.482968	1	0.0327209
P30780	groS groES Atu0683 AGR_C_1221	10 kDa chaperonin (GroES protein) (Protein Cpn10)	0.334762	0	0.160646
P33452	rpoD sigA Atu2167 AGR_C_3929	RNA polymerase sigma factor RpoD (Major vegetative sigma factor) (Sigma-70)	0.785769	0	0.680499
P50018	dnaJ Atu0121 AGR_C_192	Chaperone protein DnaJ	1.97226	0	0.0609183
P50019	dnaK Atu0122 AGR_C_195	Chaperone protein DnaK (HSP70) (Heat shock 70 kDa protein) (Heat shock protein 70)	0.597424	0	0.0603696
P58665	ispG gcpE Atu2723 AGR_C_4936	4-hydroxy-3-methylbut-2-en-1-yl diphosphate synthase (flavodoxin) (EC 1.17.7.3) (1-hydroxy-2-methyl-2-(E)-butenyl 4-diphosphate synthase)	DSM only	0	0.18462
P58673	ispH lytB Atu0774 AGR_C_1414	4-hydroxy-3-methylbut-2-enyl diphosphate reductase (HMBPP reductase) (EC 1.17.7.4)	DSM only	0	0.207603
P58739	dadA Atu3293 AGR_L_3050	D-amino acid dehydrogenase (EC 1.4.99.-)	3.87145	0	0.0940298
P58745	rsmH mraW Atu2102 AGR_C_3815	Ribosomal RNA small subunit methyltransferase H (EC 2.1.1.199) (16S rRNA m(4)C1402 methyltransferase) (rRNA (cytosine-N(4)-)-methyltransferase RsmH)	DSM only	1	0.00164919
P58795	Atu1728 AGR_C_3175	NAD(P)H dehydrogenase (quinone) (EC 1.6.5.2) (Flavoprotein WrbA) (NAD(P)H:quinone oxidoreductase) (NQO)	4.20328	0	0.217693
P68995	rpmD Atu1928.1 AGR_C_3526	50S ribosomal protein L30	1.64682	0	0.548232
P96307	flaA fliC_3 AGTUEHA105_LOCUS229 SY94_0435	Flagellin	0.156333	0	0.128149
P96308	flaB fliC_2 AGTUEHA105_LOCUS228 SY94_0434	Flagellin	0.518612	0	0.222393
P96309	flaC fliC_1 AGTUEHA105_LOCUS227	Flagellin	DSM only	0	0.0640371
Q07737	chvG Atu0033 AGR_C_52	Sensor protein ChvG (EC 2.7.13.3)	DRM only	0	0.217202
Q44349	traA Atu6127 AGR_pTi_237	Conjugal transfer protein TraA	DSM only	0	0.554296
Q44430	ntrC AGTUEHA105_LOCUS1126 CFBP5499_06325 SY94_1340	DNA-binding transcriptional regulator NtrC (Nitrogen regulation protein NR(I))	DRM only	0	0.083952
Q7CRG9	Atu3053	ABC transporter, nucleotide binding/ATPase protein (Peptide)	DSM only	0	0.186974
Q7CRH1	Atu3055	Uncharacterized protein	DSM only	0	0.24823
Q7CRK5	Atu3091	Uncharacterized protein	DRM only	0	0.184698
Q7CRV9	Atu3203	RND multidrug efflux membrane permease	DRM only	1	0.0494548
Q7CRW1	Atu3205	Uncharacterized protein	DSM only	0	0.0884106
Q7CRW2	Atu3206	Uncharacterized protein	DRM only	0	0.195942
Q7CRW6	Atu3212	ABC transporter, substrate binding protein (Oligopeptide)	DSM only	0	0.186974
Q7CRY6	Atu3235	AP_endonuc_2 domain-containing protein	DSM only	0	0.215224
Q7CSJ7	bkdB Atu3471	Dihydrolipoamide acetyltransferase component of pyruvate dehydrogenase complex (EC 2.3.1.-)	0.723411	0	0.571971
Q7CSK4	mccB Atu3478	3-methylcrotonoyl-CoA carboxylase beta subunit	DSM only	0	0.310183
Q7CSK5	mccA Atu3479	3-methylcrotonyl-CoA carboxylase alpha subunit	DSM only	0	0.264016
Q7CSK7	Atu3481	Enoyl-CoA hydratase/isomerase family protein	DSM only	0	0.183504
Q7CSM1	Atu3498	Aldehyde dehydrogenase	DSM only	0	0.0783972
Q7CSM6	Atu3504	ABC transporter, substrate binding protein (Sulfate)	DSM only	0	0.207831
Q7CSM9	Atu3507	SH3b domain-containing protein	DRM only	1	0.0263663
Q7CSN1	Atu3510	Amidohydrolase	DSM only	0	0.80223
Q7CSN8	ppiD Atu3519	Parvulin-like PPIase (Peptidyl-prolyl cis-trans isomerase plp) (Rotamase plp)	DSM only	0	0.137533
Q7CSN9	secA Atu3520 AGR_L_2621	Protein translocase subunit SecA (EC 7.4.2.8)	1.28576	0	0.51977
Q7CST1	Atu3568	TPR_REGION domain-containing protein	DSM only	0	0.0813173
Q7CSU0	Atu3577	Transcriptional regulator	DRM only	0	0.319079
Q7CSU1	glpD Atu3578	Glycerol-3-phosphate dehydrogenase (EC 1.1.5.3)	DRM only	0	0.241096
Q7CSU6	Atu3585	Glutathione S-transferase	DSM only	0	0.379864
Q7CSV6	etfA Atu3596	Electron transfer flavoprotein alpha subunit	DSM only	0	0.190624
Q7CSW1	Atu3602	Uncharacterized protein	DRM only	0	0.0850867
Q7CSX1	Atu3613	Methyltransf_11 domain-containing protein	DSM only	0	0.183504
Q7CSY9	dacF Atu3634	Penicillin-binding protein dacf	DSM only	0	0.281036
Q7CSZ6	vgrG Atu3642	VgrG protein	1.67283	0	0.712821
Q7CT08	Atu3662	Uncharacterized protein	DRM only	0	0.206349
Q7CT31	Atu3687	TonB-dependent receptor	DRM only	0	0.169866
Q7CT39	Atu3695	TPR_REGION domain-containing protein	DSM only	0	0.183669
Q7CT48	Atu3708	Outer surface protein	DRM only	0	0.185902
Q7CT50	ftsH Atu3710	ATP-dependent zinc metalloprotease FtsH (EC 3.4.24.-)	18.95	1	0.00452506
Q7CT55	tolQ Atu3717	Tol-Pal system protein TolQ	DRM only	0	0.152906
Q7CT66	Atu3732	Hemolysin	DRM only	0	0.0829009
Q7CT75	motB Atu3746	Flagellar motor protein	DRM only	1	0.0362395
Q7CT76	Atu3747	Uncharacterized protein	DRM only	0	0.190719
Q7CT96	Atu3770	5'-nucleotidase	0.812687	0	0.806821
Q7CTA1	Atu3777	Uncharacterized protein	DRM only	0	0.245104
Q7CTA4	Atu3780	Uncharacterized protein	DRM only	0	0.195942
Q7CTC0	Atu3798	Transcriptional regulator, TetR family	DRM only	0	0.185384
Q7CTD7	Atu3815	Transcriptional regulator, GntR family	DRM only	0	0.232685
Q7CTL5	Atu3909	Conserved hypothetical	DRM only	0	0.183536
Q7CTL7	Atu3912	Uncharacterized protein	DSM only	0	0.360513
Q7CTM7	repA Atu3924	Replication protein A	DRM only	0	0.0549513
Q7CTP3	arcB Atu3949	Ornithine cyclodeaminase	DRM only	0	0.384885
Q7CTR4	Atu3970	ABC transporter, nucleotide binding/ATPase protein (Sugar)	0.878166	0	0.836535
Q7CTU5	arcA Atu4007	Arginase (EC 3.5.3.1)	0.206641	1	0.0224555
Q7CTW5	Atu4029	Gluconolactonase	DSM only	0	0.156459
Q7CTX0	Atu4034	Two component sensor kinase	DRM only	0	0.401925
Q7CTX3	gcd Atu4037	Glucose dehydrogenase	DSM only	0	0.199402
Q7CTX8	Atu4044	ABC transporter, nucleotide binding/ATPase protein (Glycine betaine)	DRM only	0	0.378255
Q7CTY1	Atu4047	Histidine kinase (EC 2.7.13.3)	DRM only	0	0.306582
Q7CTZ7	Atu4063	O-linked GlcNAc transferase	DRM only	1	0.0366694
Q7CTZ8	soxB Atu4066	Sarcosine oxidase beta subunit	DSM only	0	0.151077
Q7CU06	exoC Atu4074	Phosphoglucomutase	DSM only	1	0.0438986
Q7CU15	Atu4088	HTH-type transcriptional regulator	DRM only	0	0.210627
Q7CU26	rpsA Atu4104	30S ribosomal protein S1	0.109541	1	0.0017103
Q7CU70	Atu4153	Aldehyde dehydrogenase (NAD(+)) (EC 1.2.1.3)	0.727558	0	0.501282
Q7CU78	Atu4162	Two component response regulator	DSM only	0	0.299139
Q7CU80	Atu4164	Two component sensor kinase	DRM only	0	0.126591
Q7CU84	Atu4168	DUF883_C domain-containing protein	DRM only	0	0.193498
Q7CU92	clpB Atu4177 AGR_L_1346	Chaperone protein ClpB	DSM only	0	0.138083
Q7CUC1	cspA Atu4214	Cold shock protein	DSM only	0	0.167441
Q7CUG2	Atu4256	ABC transporter, nucleotide binding/ATPase protein (Oligopeptide)	0.945395	0	0.931395
Q7CUM3	rbsA Atu4321	ABC transporter, nucleotide binding/ATPase protein (Ribose)	1.33724	0	0.751396
Q7CUN4	impK Atu4333	OmpA-like porin	DRM only	1	0.0152897
Q7CUP5	clpB Atu4344	ATP-dependent Clp protease, ATP-binding subunit	4.835	0	0.0834027
Q7CUP8	Atu4347	Uncharacterized protein	DSM only	0	0.102245
Q7CUQ0	Atu4349	DUF4123 domain-containing protein	DSM only	0	0.814207
Q7CUQ2	Atu4351	Uncharacterized protein	1.06683	0	0.901054
Q7CUT0	nnrR Atu4380	Transcriptional regulatory, Crp family	DRM only	0	0.308628
Q7CUT2	nirK Atu4382	Copper-containing nitrite reductase (EC 1.7.2.1)	DSM only	0	0.183504
Q7CUT7	norQ Atu4387	Nitric oxide reductase NorQ protein	DRM only	0	0.218517
Q7CUT9	norC Atu4389	Nitric oxide reductase, cytochrome c-containing subunit	DRM only	0	0.184624
Q7CV15	sitB Atu4470	ABC transporter, nucleotide binding/ATPase protein (Iron)	4.21287	0	0.241363
Q7CV16	sitA Atu4471	ABC transporter, substrate binding protein (Iron)	0.566928	0	0.554825
Q7CV35	kdgA Atu4494	Keto-hydroxyglutarate-aldolase/keto-deoxy-phosphogluconate aldolase	DSM only	0	0.300119
Q7CV36	Atu4495	Uncharacterized protein	DSM only	0	0.435852
Q7CV70	Atu4533	ABC transporter, nucleotide binding/ATPase protein (Amino acid)	DRM only	0	0.212029
Q7CVD9	Atu4606	Uncharacterized protein	DSM only	0	0.219529
Q7CVF6	Atu4626	ABC transporter, substrate binding protein (Oligopeptide)	DSM only	0	0.191677
Q7CVF7	Atu4627	Uncharacterized protein	DRM only	0	0.252185
Q7CVI4	Atu4656	Uncharacterized protein	DSM only	0	0.183504
Q7CVJ5	Atu4667	ABC transporter, nucleotide binding/ATPase protein	DRM only	1	0.0337435
Q7CVJ7	Atu4669	Uncharacterized protein	DRM only	0	0.254645
Q7CVN4	Atu4710	MFS permease	DRM only	0	0.22358
Q7CVQ5	acnB Atu4734	(2R,3S)-2-methylisocitrate dehydratase (EC 4.2.1.3) ((2S,3R)-3-hydroxybutane-1,2,3-tricarboxylate dehydratase) (Probable 2-methyl-cis-aconitate hydratase)	1.58792	0	0.609578
Q7CVQ8	Atu4739	Flavin-containing monooxygenase	1.19127	0	0.900307
Q7CVQ9	Atu4740	Zinc-binding dehydrogenase	0.0633122	0	0.154009
Q7CVR4	Atu4745	ABC transporter, nucleotide binding/ATPase protein (Sugar)	DRM only	0	0.694993
Q7CVT1	gabD Atu4762	Succinate semialdehyde dehydrogenase	DRM only	0	0.379078
Q7CVU8	Atu4780	Uncharacterized protein	DSM only	0	0.051838
Q7CVZ3	Atu4827	ABC transporter, membrane spanning protein	DRM only	1	0.00372491
Q7CW12	Atu4849	NADP-dependent aldehyde dehydrogenase	DSM only	0	0.275496
Q7CW18	traA Atu4855	Conjugation protein	0.480124	0	0.622146
Q7CW46	Atu4884	RHH_1 domain-containing protein	DSM only	0	0.207831
Q7CW53	tnp Atu4894	Transposase	DRM only	1	0.00605061
Q7CW57	Atu2834	Protoporphyrinogen IX oxidase (PPO) (EC 1.3.99.-)	DRM only	0	0.185384
Q7CW61	parB1 Atu2828	Chromosome Partitioning Protein	DSM only	0	0.201977
Q7CW62	sun Atu2825	Sun protein	0.425374	0	0.41619
Q7CW97	obg Atu2781 AGR_C_5047	GTPase Obg (EC 3.6.5.-) (GTP-binding protein Obg)	0.720165	0	0.7212
Q7CWA0	Atu2774	Carboxy-terminal protease	0.345148	1	0.0244184
Q7CWA3	bfr Atu2771	Bacterioferritin (EC 1.16.3.1)	DSM only	0	0.195815
Q7CWA6	Atu2768	Uncharacterized protein	11.411	0	0.213104
Q7CWC6	Atu2746	Uncharacterized protein	0.396368	0	0.38193
Q7CWD9	chvB Atu2730	Beta (1-->2) glucan biosynthesis protein	DRM only	0	0.495224
Q7CWF5	Atu2710	Peptidase_M48 domain-containing protein	DRM only	1	0.0152897
Q7CWF6	Atu2708	MFS permease	DRM only	0	0.367151
Q7CWG2	ffh Atu2697	Signal recognition particle protein (Fifty-four homolog)	DRM only	0	0.159196
Q7CWI2	Atu2672	Uncharacterized protein	0.149342	1	0.0210804
Q7CWI9	dcp Atu2664	Peptidyl-dipeptidase	DSM only	0	0.207831
Q7CWJ5	Atu2656	HemY_N domain-containing protein	16.2051	1	0.0158503
Q7CWJ6	Atu2655	Uncharacterized protein	DRM only	0	0.127138
Q7CWK7	mdh Atu2639 AGR_C_4782	Malate dehydrogenase (EC 1.1.1.37)	0.22874	1	0.0380418
Q7CWL8	atpH Atu2625 AGR_C_4759	ATP synthase subunit delta (ATP synthase F(1) sector subunit delta) (F-type ATPase subunit delta) (F-ATPase subunit delta)	0.638662	0	0.596862
Q7CWM5	Atu2615	POTRA domain-containing protein	DRM only	0	0.365869
Q7CWN4	Atu2604	Oxidoreductase	DSM only	0	0.207831
Q7CWP6	redB Atu2591	Glucosyltransferase	DRM only	0	0.244033
Q7CWQ8	Atu2578	cAMP-dependent protein kinase regulatory subunit	DRM only	0	0.107267
Q7CWS2	modA Atu2561	ABC transporter, substrate binding protein (Molybdate)	DSM only	0	0.183504
Q7CWS9	nodT Atu2552	Nodulation protein T	10.721	1	0.00256788
Q7CWT1	Atu2550	RND multidrug efflux membrane permease	DRM only	1	0.000541858
Q7CWX7	mtbA Atu2492	MFS permease	DRM only	0	0.0539926
Q7CWX8	asd Atu2490	Aspartate-semialdehyde dehydrogenase (ASA dehydrogenase) (ASADH) (EC 1.2.1.11) (Aspartate-beta-semialdehyde dehydrogenase)	DSM only	0	0.2974
Q7CX21	Atu2439	Uncharacterized protein	DRM only	0	0.185384
Q7CX34	Atu2425	ABC transporter, nucleotide binding/ATPase protein	1.7337	0	0.223935
Q7CX36	Atu2422	ABC transporter, substrate binding protein (Amino acid)	DSM only	1	0.038251
Q7CX59	sinR Atu2394	Regulator of Biofilm formation, Fnr Family	0.327465	1	0.003765
Q7CX75	Atu2377	Succinoglycan biosynthesis transport protein	DRM only	0	0.076671
Q7CX89	mcpA Atu2360	Methyl-accepting chemotaxis protein	DSM only	0	0.280757
Q7CXD3	xdhB Atu2310	Xanthine dehydrogenase C-terminal subunit	DSM only	0	0.320355
Q7CXG0	Atu2281	ABC transporter, substrate binding protein (Proline/glycine betaine)	DSM only	1	0.0403827
Q7CXJ6	fbcF Atu2239	Ubiquinol-cytochrome c reductase iron-sulfur subunit (EC 7.1.1.8)	4.62418	0	0.0546219
Q7CXJ8	fbcC Atu2237	Cytochrome c1	DRM only	1	0.0269054
Q7CXK1	ychF Atu2233	Ribosome-binding ATPase YchF	0.431294	0	0.238119
Q7CXK8	aldA Atu2224	Aldehyde dehydrogenase	0.237995	1	0.0285492
Q7CXL3	Atu2217	Uncharacterized protein	DRM only	0	0.212029
Q7CXM1	petR Atu2206	Two component response regulator	DSM only	0	0.225674
Q7CXP1	Atu2181	Elp3 domain-containing protein	DSM only	0	0.553678
Q7CXS4	Atu2143	ABC transporter, membrane spanning protein (Amino acid)	DRM only	0	0.239933
Q7CXS9	Atu2138	Dehydrogenase	DSM only	0	0.15311
Q7CXT9	iivG Atu2128	Acetolactate synthase large subunit	DSM only	0	0.222543
Q7CXV0	pfp Atu2115	Pyrophosphate--fructose 6-phosphate 1-phosphotransferase (EC 2.7.1.90) (6-phosphofructokinase, pyrophosphate dependent) (PPi-dependent phosphofructokinase) (PPi-PFK) (Pyrophosphate-dependent 6-phosphofructose-1-kinase)	DSM only	0	0.0793035
Q7CXX0	bamD Atu2084	Outer membrane protein assembly factor BamD	DRM only	0	0.141742
Q7CXZ3	pcrA Atu2057	DNA helicase (EC 3.6.4.12)	DSM only	0	0.863944
Q7CY01	hflK Atu2045	Protein HflK	10.4603	1	0.019396
Q7CY08	ilvI Atu2036	Acetolactate synthase (EC 2.2.1.6)	DRM only	0	0.257359
Q7CY18	Atu2025	Transcriptional regulator	DRM only	0	0.288606
Q7CY20	adh Atu2022	NADP-dependent alcohol dehydrogenase	DSM only	0	0.175095
Q7CY37	uvrB Atu2001	UvrABC system protein B (Protein UvrB) (Excinuclease ABC subunit B)	DSM only	0	0.195205
Q7CY44	Atu1993	tRNA/rRNA metyltransferase	DSM only	1	0.0398745
Q7CY49	Atu1986	Histidine kinase (EC 2.7.13.3)	3.42485	0	0.300755
Q7CY67	secE Atu1962	Protein translocase subunit SecE	DRM only	0	0.185827
Q7CY83	prlA secY Atu1927	Protein translocase subunit SecY	DRM only	0	0.0959395
Q7CY88	Atu1915	Periplasmic serine endoprotease DegP-like (EC 3.4.21.107)	DSM only	0	0.142094
Q7CYB9	psuG Atu1876	Pseudouridine-5'-phosphate glycosidase (PsiMP glycosidase) (EC 4.2.1.70)	0.589169	0	0.359128
Q7CYG9	Atu1815	HlyD family secretion protein	DRM only	0	0.0763888
Q7CYH4	Atu1804	Uncharacterized protein	DSM only	0	0.225674
Q7CYI8	Atu1789	Lipoprotein	DSM only	1	0.00613032
Q7CYK3	Atu1773	Uncharacterized protein	0.31003	0	0.21965
Q7CYK7	nnrE nnrD Atu1768	Bifunctional NAD(P)H-hydrate repair enzyme (Nicotinamide nucleotide repair protein) [Includes: ADP-dependent (S)-NAD(P)H-hydrate dehydratase (EC 4.2.1.136) (ADP-dependent NAD(P)HX dehydratase); NAD(P)H-hydrate epimerase (EC 5.1.99.6)]	DSM only	0	0.343351
Q7CYM0	Atu1751	PNPLA domain-containing protein	DRM only	0	0.20336
Q7CYM8	Atu1739	Permease	DRM only	0	0.248464
Q7CYP2	fadL Atu1717	Long-chain fatty acid transport protein	DRM only	0	0.0644758
Q7CYX4	Atu1589	Aminotransferase (EC 2.6.1.-)	4.15377	1	0.00162174
Q7CYX5	hom Atu1588	Homoserine dehydrogenase (EC 1.1.1.3)	DSM only	0	0.0653725
Q7CYY9	fdhA Atu1567	Glutathione-independent formaldehyde dehydrogenase	DSM only	0	0.343176
Q7CYZ3	secD secF Atu1562	Multifunctional fusion protein [Includes: Protein translocase subunit SecD; Protein-export membrane protein SecF]	DRM only	0	0.176981
Q7CZ11	fixN Atu1537	Cytochrome-c oxidase (EC 7.1.1.9)	DRM only	0	0.0547645
Q7CZ32	Atu1514	Uncharacterized protein	DSM only	0	0.225331
Q7CZ37	gyrA Atu1507	DNA gyrase subunit A (EC 5.6.2.2)	DSM only	0	0.271238
Q7CZ66	rluC Atu1471	Pseudouridine synthase (EC 5.4.99.-)	DSM only	1	0.0196283
Q7CZ70	gcvT Atu1464	Glycine cleavage system T protein (EC 2.1.2.10)	DSM only	0	0.380533
Q7CZ83	ntrY Atu1447	Nitrogen regulation protein (EC 2.7.13.3)	DRM only	0	0.187746
Q7CZ96	aceF Atu1432	Dihydrolipoamide acetyltransferase	0.197091	0	0.0766513
Q7CZ99	pdhA Atu1429	Pyruvate dehydrogenase E1 component subunit alpha (EC 1.2.4.1)	0.729543	0	0.61472
Q7CZE9	Atu1362	Histidine kinase (EC 2.7.13.3)	DRM only	0	0.236619
Q7CZF1	Atu1360	Uncharacterized protein	DRM only	0	0.401925
Q7CZF4	Atu1357	Uncharacterized protein	DRM only	1	0.0385036
Q7CZG0	fdx Atu1350	Ferrodoxin	DRM only	0	0.399679
Q7CZH1	rne Atu1339	Ribonuclease E (RNase E) (EC 3.1.26.12)	0.0910196	1	0.0432201
Q7CZK7	Atu1285	Metal dependent hydrolase	DSM only	1	0.00578727
Q7CZL6	nuoG Atu1276	NADH-quinone oxidoreductase (EC 7.1.1.-)	0.171221	1	0.00225957
Q7CZN9	ctaA cox15 Atu1242 AGR_C_2290	Heme A synthase (HAS) (EC 1.3.-.-) (Cytochrome aa3-controlling protein)	DRM only	1	0.00224367
Q7CZP8	Atu1232	Uncharacterized protein	DRM only	0	0.14362
Q7CZR5	Atu1206	Uncharacterized protein	DRM only	0	0.190719
Q7CZT4	Atu1181	HTH merR-type domain-containing protein	DSM only	0	0.271216
Q7CZT5	Atu1177	Uncharacterized protein	DSM only	0	0.230155
Q7CZT7	Atu1175	SmpA_OmlA domain-containing protein	DRM only	0	0.205484
Q7CZV4	rnd Atu1151	Ribonuclease D (RNase D) (EC 3.1.13.5)	DSM only	0	0.183504
Q7CZW1	ppk Atu1144	Polyphosphate kinase (EC 2.7.4.1) (ATP-polyphosphate phosphotransferase) (Polyphosphoric acid kinase)	DSM only	0	0.0954691
Q7CZW8	rlmJ Atu1135	Ribosomal RNA large subunit methyltransferase J (EC 2.1.1.266) (23S rRNA (adenine(2030)-N6)-methyltransferase) (23S rRNA m6A2030 methyltransferase)	DSM only	0	0.183504
Q7CZZ6	mltG Atu1099	Endolytic murein transglycosylase (EC 4.2.2.-) (Peptidoglycan polymerization terminase)	DRM only	1	0.017944
Q7D003	Atu1087	Secretion protein	DRM only	0	0.0546472
Q7D019	Atu1064	ABC transporter, nucleotide binding/ATPase protein	DRM only	0	0.183536
Q7D038	Atu1042	MOSC domain-containing protein	DRM only	1	0.0398698
Q7D046	Atu1028	NYN domain-containing protein	DSM only	0	0.150915
Q7D073	Atu0988	Molecular chaperone, Hsp70 family	DRM only	1	0.0499374
Q7D087	lipA Atu0972	LipA protein	DRM only	0	0.185384
Q7D0H1	mcpC Atu0872	Methyl-accepting chemotaxis protein	DSM only	0	0.300119
Q7D0H2	ilvE Atu0871	Probable branched-chain-amino-acid aminotransferase	DSM only	1	0.0293072
Q7D0J6	Atu0845	YkuD domain-containing protein	9.66121	0	0.0955427
Q7D0L3	qor Atu0825	Quinone oxidoreductase	DSM only	1	0.00114616
Q7D0M5	Atu0804	Proton/glutamate transport protein	DRM only	0	0.0923486
Q7D0M8	smc Atu0801	Chromosome partition protein Smc	DSM only	0	0.270703
Q7D0P0	Atu0786	Peptidase, family M16	DSM only	0	0.215224
Q7D0Q4	coxB Atu0767	Cytochrome c oxidase subunit 2 (EC 7.1.1.9)	11.3312	0	0.147884
Q7D0U9	atpF2 atpG Atu0716 AGR_C_1299	ATP synthase subunit b 2 (ATP synthase F(0) sector subunit b 2) (ATPase subunit I 2) (F-type ATPase subunit b 2) (F-ATPase subunit b 2)	2.13207	0	0.467103
Q7D0V6	Atu0709	Iron-sulfur cluster carrier protein	1.44568	0	0.410481
Q7D0X0	Atu0693	PmbA/TldD related protein	DSM only	0	0.186878
Q7D0X6	Atu0687	Uncharacterized protein	DRM only	0	0.23023
Q7D105	Atu0653	Uncharacterized protein	2.18322	0	0.581354
Q7D110	Atu0648	S1 motif domain-containing protein	0.865566	0	0.516837
Q7D114	Atu0643	Uncharacterized protein	DRM only	0	0.210553
Q7D119	sohB Atu0637	Proteinase sohB	DSM only	0	0.207603
Q7D122	ispB Atu0634	Octaprenyl-diphosphate synthase	DRM only	0	0.38592
Q7D123	Atu0633	Uncharacterized protein	DSM only	0	0.225674
Q7D130	guaB Atu0624	Inosine-5'-monophosphate dehydrogenase (IMP dehydrogenase) (IMPD) (IMPDH) (EC 1.1.1.205)	0.153397	0	0.057972
Q7D145	Atu0603	Uncharacterized protein	DSM only	0	0.258424
Q7D146	glnA Atu0602	Glutamine synthetase	0.765335	0	0.662009
Q7D148	zwf Atu0600	Glucose-6-phosphate 1-dehydrogenase (G6PD) (EC 1.1.1.49)	DSM only	0	0.220095
Q7D153	aglA Atu0594	Alpha-glucosidase	DSM only	0	0.281036
Q7D179	flaD Atu0567	Flagellin	DSM only	1	0.00937152
Q7D1A0	agrR Atu0525	Transcriptional regulator, LuxR family	1.00177	0	0.998244
Q7D1B3	phaD Atu0510	pH adaption potassium efflux system protein	DRM only	0	0.319079
Q7D1B8	Atu0504	Uncharacterized protein	DRM only	0	0.335979
Q7D1C3	Atu0499	PG_binding_1 domain-containing protein	DSM only	1	0.0467155
Q7D1H9	Atu0419	Histidine kinase (EC 2.7.13.3)	DRM only	0	0.337635
Q7D1J1	scrK Atu0401	Fructokinase	DSM only	0	0.186878
Q7D1J4	Atu0396	Coenzyme A transferase	0.817271	0	0.828503
Q7D1L1	Atu0372	AMP nucleosidase (EC 3.2.2.4)	DSM only	1	0.0476704
Q7D1M0	Atu0359	Hemolysin	DSM only	0	0.175095
Q7D1M1	phoH Atu0357	Phosphate starvation inducible protein	0.0476502	0	0.163301
Q7D1N4	trmH Atu0341	rRNA methylase	DSM only	0	0.300119
Q7D1N9	Atu0334	OstA-like_N domain-containing protein	DSM only	0	0.870152
Q7D1P1	hpf Atu0331	Ribosome hibernation promoting factor (HPF)	0.689461	1	0.0401677
Q7D1P8	dfp coaBC Atu0316	Coenzyme A biosynthesis bifunctional protein CoaBC (DNA/pantothenate metabolism flavoprotein) (Phosphopantothenoylcysteine synthetase/decarboxylase) (PPCS-PPCDC) [Includes: Phosphopantothenoylcysteine decarboxylase (PPC decarboxylase) (PPC-DC) (EC 4.1.1.36) (CoaC); Phosphopantothenate--cysteine ligase (EC 6.3.2.5) (CoaB) (Phosphopantothenoylcysteine synthetase) (PPC synthetase) (PPC-S)]	DSM only	0	0.23497
Q7D1R0	dnaN Atu0301	Beta sliding clamp	DSM only	0	0.0884106
Q7D1R4	Atu0296	NADH-ubiquinone oxidoreductase	9.74389	0	0.125415
Q7D1X7	ctpG Atu0218	Component of type IV pilus	DSM only	0	0.739824
Q7D228	Atu0159	ABC transporter, nucleotide binding/ATPase protein	DRM only	0	0.389372
Q7D230	Atu0157	ABC transporter, substrate binding protein	DSM only	0	0.281036
Q7D235	fabA Atu0151 AGR_C_246	3-hydroxydecanoyl-[acyl-carrier-protein] dehydratase (EC 4.2.1.59) (3-hydroxyacyl-[acyl-carrier-protein] dehydratase FabA) (Beta-hydroxydecanoyl thioester dehydrase) (Trans-2-decenoyl-[acyl-carrier-protein] isomerase) (EC 5.3.3.14)	DSM only	0	0.0813173
Q7D236	fabB Atu0150	3-oxoacyl-(Acyl-carrier-protein) synthase	DSM only	0	0.305855
Q7D237	fabI Atu0149	Enoyl-[acyl-carrier-protein] reductase [NADH] (EC 1.3.1.9)	DSM only	0	0.236036
Q7D242	cyoA Atu0142	Ubiquinol oxidase subunit 2	DRM only	1	0.0127524
Q7D246	surf Atu0138	SURF1-like protein	DRM only	0	0.176941
Q7D253	Atu0127	ABC transporter, nucleotide binding/ATPase protein (Sugar/ribonucleotide)	DRM only	0	0.337622
Q7D262	Atu0113	C4-dicarboxylate transport sensor protein (EC 2.7.13.3)	DRM only	0	0.216623
Q7D266	Atu0108	Putative metalloprotease M20 family	DSM only	0	0.156651
Q7D284	rsmC Atu0081	Ribosomal RNA small subunit methyltransferase	DSM only	1	0.0152009
Q7D292	nrdF Atu0071	Ribonucleoside-diphosphate reductase subunit beta (EC 1.17.4.1)	0.930089	0	0.915152
Q7D293	nrdE Atu0070	Ribonucleoside-diphosphate reductase (EC 1.17.4.1)	0.631695	0	0.644508
Q7D2A3	hrpB Atu0052	Helicase	DSM only	0	0.281036
Q7D2B0	chvI Atu0034	Two component response regulator	1.14113	0	0.847127
Q7D2B8	uvrD Atu0023	DNA helicase (EC 3.6.4.12)	DSM only	0	0.230142
Q7D2B9	trxA Atu0022	Thioredoxin	DSM only	0	0.225133
Q7D2D0	Atu0008	Tim44 domain-containing protein	DRM only	0	0.16583
Q7D2Y1	Atu5494	DUF892 domain-containing protein	DSM only	0	0.183504
Q7D362	Atu5404	Transcriptional regulator	DRM only	0	0.306582
Q7D3R2	avhB11 Atu5172	Type IV secretion system protein	DRM only	1	0.0159522
Q7D3R3	avhB10 Atu5171	Type IV secretion protein AvhB10	DRM only	1	0.00101566
Q7D3R4	avhB9 Atu5170	Type IV secretion protein AvhB9	DRM only	1	0.0013198
Q7D3R5	avhB8 Atu5169	Type IV secretion system protein virB8	1.62695	0	0.39248
Q7D3R9	avhB4 Atu5165	Type IV secretion system protein virB4	1.05549	0	0.875183
Q7D3S0	avhB3 Atu5164	Type IV secretion protein AvhB3	DRM only	0	0.185384
Q7D3V8	Atu5117	HEPN domain-containing protein	0.715519	0	0.323439
Q7D3X8	rcdB Atu5091	Curdlan synthesis protein	32.4386	1	0.0320876
Q7D3Y0	Atu5089	Uncharacterized protein	DRM only	1	0.0430975
Q8U4W5	Atu8095	Uncharacterized protein	DRM only	1	0.000662748
Q8U4Y6	Atu8037	Uncharacterized protein	DSM only	0	0.183504
Q8U502	Atu4613	Glycosyltransferase	DRM only	0	0.233711
Q8U529	Atu8182	Uncharacterized protein	DSM only	0	0.115023
Q8U537	Atu8179	Uncharacterized protein	DRM only	0	0.190719
Q8U549	Atu2283	Pseudoazurin	0.275916	0	0.356244
Q8U553	Atu8175	Putative transmembrane protein, RNA-binding region RNP-1 (RNA recognition motif)	DRM only	0	0.118586
Q8U559	chvD ettA Atu2125	Energy-dependent translational throttle protein EttA (EC 3.6.1.-) (Translational regulatory factor EttA)	1.0732	0	0.952867
Q8U561	Atu8171	Uncharacterized protein	DRM only	1	0.0186268
Q8U562	Atu8170	Uncharacterized protein	0.299514	0	0.299732
Q8U573	Atu8167	Putative transmembrane protein	DSM only	0	0.379864
Q8U599	Atu1632	Dimethylglycine dehydrogenase	DSM only	1	0.0249012
Q8U5A0	Atu8160	DUF2059 domain-containing protein	DSM only	0	0.173986
Q8U5A1	Atu8159	Uncharacterized protein	DRM only	0	0.185384
Q8U5B2	hflx hflX Atu1451	GTPase HflX (GTP-binding protein HflX)	DSM only	0	0.207831
Q8U5E3	cvpA Atu1076	Colicin V production protein	DRM only	0	0.20071
Q8U5E4	Atu1074	NAD/NADP dependent oxidoreductase	DSM only	0	0.156091
Q8U5E6	Atu8147	LysM domain-containing protein	DRM only	0	0.0588252
Q8U5F3	Atu8146	Uncharacterized protein	DRM only	0	0.184024
Q8U5M0	Atu8121	Uncharacterized protein	DRM only	1	0.00391698
Q8U5W4	Atu5121	Two component response regulator	1.36689	0	0.705302
Q8U705	argH2 Atu4651 AGR_L_463	Argininosuccinate lyase 2 (ASAL 2) (EC 4.3.2.1) (Arginosuccinase)	DRM only	0	0.185384
Q8U7G2	metN Atu4487 AGR_L_765	Methionine import ATP-binding protein MetN (EC 7.4.2.11)	0.569313	0	0.576308
Q8U7H5	gltX Atu4474 AGR_L_791	Glutamate--tRNA ligase (EC 6.1.1.17) (Glutamyl-tRNA synthetase) (GluRS)	DSM only	0	0.0520504
Q8U7H6	lysS Atu4473 AGR_L_794	Lysine--tRNA ligase (EC 6.1.1.6) (Lysyl-tRNA synthetase) (LysRS)	DSM only	0	0.538441
Q8U7I5	tal talB Atu4464 AGR_L_812	Transaldolase (EC 2.2.1.2)	DSM only	0	0.183504
Q8U7P1	napA Atu4408 AGR_L_917	Periplasmic nitrate reductase (EC 1.9.6.1)	0.413946	0	0.213442
Q8U7Y1	Atu4318 AGR_L_1091	Putative D-xylulose reductase (EC 1.1.1.9) (Xylitol dehydrogenase) (XDH)	DSM only	0	0.101172
Q8U8I2	sdh Atu4110 AGR_L_1487	Serine 3-dehydrogenase (EC 1.1.1.276)	DSM only	0	0.379864
Q8U8M6	rpsU1 Atu4064 AGR_L_1581	30S ribosomal protein S21 A	0.714794	0	0.758603
Q8U8Z9	hutU Atu3931 AGR_L_1830	Urocanate hydratase (Urocanase) (EC 4.2.1.49) (Imidazolonepropionate hydrolase)	DSM only	0	0.280016
Q8U920	pxpA1 Atu3910 AGR_L_1871	5-oxoprolinase subunit A 1 (5-OPase subunit A 1) (EC 3.5.2.9) (5-oxoprolinase (ATP-hydrolyzing) subunit A 1)	0.399837	0	0.269396
Q8U9F7	hemH Atu3771 AGR_L_2129	Ferrochelatase (EC 4.99.1.1) (Heme synthase) (Protoheme ferro-lyase)	DRM only	0	0.0592328
Q8U9F9	omp10 Atu3769 AGR_L_2135	Outer membrane lipoprotein omp10 homolog	DRM only	0	0.185384
Q8U9I5	rpmE Atu3743 AGR_L_2181	50S ribosomal protein L31	DSM only	0	0.180677
Q8U9I9	pgk Atu3739 AGR_L_2193	Phosphoglycerate kinase (EC 2.7.2.3)	DSM only	1	0.00498276
Q8U9K1	Atu3727 AGR_L_2215	Probable transcriptional regulatory protein Atu3727	DSM only	0	0.154711
Q8U9L4	tolB Atu3714 AGR_L_2244	Tol-Pal system protein TolB	0.492077	0	0.277946
Q8U9L5	pal omp16 palA Atu3713 AGR_L_2246	Peptidoglycan-associated lipoprotein (PAL) (Outer membrane lipoprotein Omp16 homolog)	DRM only	0	0.207187
Q8U9L9	glmM Atu3709 AGR_L_2256	Phosphoglucosamine mutase (EC 5.4.2.10)	DSM only	0	0.559054
Q8U9T8	rpsU3 Atu3637 AGR_L_2379	30S ribosomal protein S21 3	DSM only	0	0.290813
Q8U9U5	accA Atu3630 AGR_L_2394	Acetyl-coenzyme A carboxylase carboxyl transferase subunit alpha (ACCase subunit alpha) (Acetyl-CoA carboxylase carboxyltransferase subunit alpha) (EC 2.1.3.15)	2.77735	1	0.0298339
Q8U9V8	rpmB Atu3617 AGR_L_2417.1	50S ribosomal protein L28	1.02528	0	0.973857
Q8U9X6	argH1 Atu3599 AGR_L_2457	Argininosuccinate lyase 1 (ASAL 1) (EC 4.3.2.1) (Arginosuccinase)	DSM only	0	0.230155
Q8UA56	argJ Atu3518 AGR_L_2624	Arginine biosynthesis bifunctional protein ArgJ [Cleaved into: Arginine biosynthesis bifunctional protein ArgJ alpha chain; Arginine biosynthesis bifunctional protein ArgJ beta chain] [Includes: Glutamate N-acetyltransferase (EC 2.3.1.35) (Ornithine acetyltransferase) (OATase) (Ornithine transacetylase); Amino-acid acetyltransferase (EC 2.3.1.1) (N-acetylglutamate synthase) (AGSase)]	DSM only	0	0.215224
Q8UA66	ubiG Atu3508 AGR_L_2640	Ubiquinone biosynthesis O-methyltransferase (2-polyprenyl-6-hydroxyphenol methylase) (EC 2.1.1.222) (3-demethylubiquinone 3-O-methyltransferase) (EC 2.1.1.64)	DRM only	1	0.0495819
Q8UA86	rbsA1 Atu3488 AGR_L_2683	Ribose import ATP-binding protein RbsA 1 (EC 7.5.2.7)	DRM only	0	0.367151
Q8UAA5	gpmI pgm Atu3469 AGR_L_2721	2,3-bisphosphoglycerate-independent phosphoglycerate mutase (BPG-independent PGAM) (Phosphoglyceromutase) (iPGM) (EC 5.4.2.12)	DSM only	0	0.281036
Q8UAK2	Atu3371 AGR_L_2903	Putative ribose/galactose/methyl galactoside import ATP-binding protein 2 (EC 7.5.2.11) (EC 7.5.2.7)	DRM only	0	0.57313
Q8UB29	ugpC3 Atu3188 AGR_L_3244	sn-glycerol-3-phosphate import ATP-binding protein UgpC 3 (EC 7.6.2.10)	DSM only	0	0.728746
Q8UB32	ugpB Atu3185 AGR_L_3248	sn-glycerol-3-phosphate-binding periplasmic protein UgpB	DSM only	0	0.063121
Q8UBM5	htpX Atu2826 AGR_C_5123	Protease HtpX homolog (EC 3.4.24.-)	DRM only	0	0.076671
Q8UBP3	cobQ cbiP Atu2808 AGR_C_5093	Cobyric acid synthase	DSM only	0	0.549468
Q8UBR5	rplU Atu2785 AGR_C_5054	50S ribosomal protein L21	DSM only	0	0.0674074
Q8UBR6	rpmA Atu2784 AGR_C_5052	50S ribosomal protein L27	0.316308	0	0.315784
Q8UBS0	proB Atu2780 AGR_C_5045	Glutamate 5-kinase (EC 2.7.2.11) (Gamma-glutamyl kinase) (GK)	DSM only	0	0.236515
Q8UBV2	leuS Atu2748 AGR_C_4985	Leucine--tRNA ligase (EC 6.1.1.4) (Leucyl-tRNA synthetase) (LeuRS)	DSM only	0	0.191677
Q8UBV5	acsA acs Atu2745 AGR_C_4980	Acetyl-coenzyme A synthetase (AcCoA synthetase) (Acs) (EC 6.2.1.1) (Acetate--CoA ligase) (Acyl-activating enzyme)	DSM only	1	0.0275417
Q8UBZ5	rplS Atu2703 AGR_C_4900	50S ribosomal protein L19	0.0510327	1	0.0373547
Q8UBZ9	rpsP Atu2699 AGR_C_4893	30S ribosomal protein S16	0.132414	0	0.225037
Q8UC31	argG Atu2667 AGR_C_4836	Argininosuccinate synthase (EC 6.3.4.5) (Citrulline--aspartate ligase)	DSM only	0	0.995894
Q8UC37	ppa Atu2661 AGR_C_4822	Inorganic pyrophosphatase (EC 3.6.1.1) (Pyrophosphate phospho-hydrolase) (PPase)	DRM only	0	0.210627
Q8UC57	omp19 Atu2641 AGR_C_4789	Outer membrane lipoprotein omp19 homolog	DRM only	0	0.0900349
Q8UC60	sucC Atu2638 AGR_C_4780	Succinate--CoA ligase [ADP-forming] subunit beta (EC 6.2.1.5) (Succinyl-CoA synthetase subunit beta) (SCS-beta)	0.322046	0	0.0639138
Q8UC74	atpA Atu2624 AGR_C_4757	ATP synthase subunit alpha (EC 7.1.2.2) (ATP synthase F1 sector subunit alpha) (F-ATPase subunit alpha)	0.704718	0	0.480739
Q8UC75	atpG Atu2623 AGR_C_4756	ATP synthase gamma chain (ATP synthase F1 sector gamma subunit) (F-ATPase gamma subunit)	0.554564	0	0.403062
Q8UC76	atpD Atu2622 AGR_C_4754	ATP synthase subunit beta (EC 7.1.2.2) (ATP synthase F1 sector subunit beta) (F-ATPase subunit beta)	0.526727	0	0.117816
Q8UCK6	dps Atu2477 AGR_C_4495	DNA protection during starvation protein (EC 1.16.-.-)	DSM only	0	0.23606
Q8UCN6	purA Atu2447 AGR_C_4442	Adenylosuccinate synthetase (AMPSase) (AdSS) (EC 6.3.4.4) (IMP--aspartate ligase)	DSM only	0	0.514174
Q8UCT5	ureE Atu2398 AGR_C_4352	Urease accessory protein UreE	DSM only	0	0.0718943
Q8UD28	der engA Atu2300 AGR_C_4180	GTPase Der (GTP-binding protein EngA)	DSM only	0	0.0641839
Q8UD57	clpP3 Atu2270 AGR_C_4125	ATP-dependent Clp protease proteolytic subunit 3 (EC 3.4.21.92) (Endopeptidase Clp 3)	DSM only	0	0.251615
Q8UD63	leuA Atu2264 AGR_C_4114	2-isopropylmalate synthase (EC 2.3.3.13) (Alpha-IPM synthase) (Alpha-isopropylmalate synthase)	DSM only	0	0.199402
Q8UDA0	rplY ctc Atu2227 AGR_C_4048	50S ribosomal protein L25 (General stress protein CTC)	0.157046	0	0.0989656
Q8UDA9	prs prsA Atu2218 AGR_C_4031	Ribose-phosphate pyrophosphokinase (RPPK) (EC 2.7.6.1) (5-phospho-D-ribosyl alpha-1-diphosphate) (Phosphoribosyl diphosphate synthase) (Phosphoribosyl pyrophosphate synthase) (P-Rib-PP synthase) (PRPP synthase) (PRPPase)	1.72095	0	0.0543738
Q8UDE5	greA Atu2182 AGR_C_3965	Transcription elongation factor GreA (Transcript cleavage factor GreA)	DSM only	0	0.0513754
Q8UDE9	carB Atu2178 AGR_C_3955	Carbamoyl-phosphate synthase large chain (EC 6.3.5.5) (Carbamoyl-phosphate synthetase ammonia chain)	DSM only	0	0.102245
Q8UDM8	murG Atu2094 AGR_C_3798	UDP-N-acetylglucosamine--N-acetylmuramyl-(pentapeptide) pyrophosphoryl-undecaprenol N-acetylglucosamine transferase (EC 2.4.1.227) (Undecaprenyl-PP-MurNAc-pentapeptide-UDPGlcNAc GlcNAc transferase)	DRM only	0	0.267756
Q8UDM9	murC Atu2093 AGR_C_3796	UDP-N-acetylmuramate--L-alanine ligase (EC 6.3.2.8) (UDP-N-acetylmuramoyl-L-alanine synthetase)	1.23266	0	0.81874
Q8UDN0	murB Atu2092 AGR_C_3794	UDP-N-acetylenolpyruvoylglucosamine reductase (EC 1.3.1.98) (UDP-N-acetylmuramate dehydrogenase)	DSM only	0	0.164791
Q8UDP9	prmA Atu2072 AGR_C_3754	Ribosomal protein L11 methyltransferase (L11 Mtase) (EC 2.1.1.-)	DSM only	0	0.761393
Q8UDV0	ilvC Atu2019 AGR_C_3660	Ketol-acid reductoisomerase (NADP(+)) (KARI) (EC 1.1.1.86) (Acetohydroxy-acid isomeroreductase) (AHIR) (Alpha-keto-beta-hydroxylacyl reductoisomerase) (Ketol-acid reductoisomerase type 1) (Ketol-acid reductoisomerase type I)	0.354706	0	0.139938
Q8UE04	rplK Atu1960 AGR_C_3575	50S ribosomal protein L11	0.381459	0	0.333626
Q8UE05	rplA Atu1959 AGR_C_3573	50S ribosomal protein L1	0.348863	0	0.145538
Q8UE06	rplJ Atu1958 AGR_C_3572	50S ribosomal protein L10	0.848006	0	0.794743
Q8UE07	rplL Atu1957 AGR_C_3571	50S ribosomal protein L7/L12	0.371249	0	0.337756
Q8UE08	rpoB Atu1956 AGR_C_3569	DNA-directed RNA polymerase subunit beta (RNAP subunit beta) (EC 2.7.7.6) (RNA polymerase subunit beta) (Transcriptase subunit beta)	0.16764	0	0.215322
Q8UE09	rpoC Atu1955 AGR_C_3568	DNA-directed RNA polymerase subunit beta' (RNAP subunit beta') (EC 2.7.7.6) (RNA polymerase subunit beta') (Transcriptase subunit beta')	0.136735	0	0.172518
Q8UE13	rpsL Atu1951 AGR_C_3561	30S ribosomal protein S12	0.19059	0	0.12349
Q8UE14	rpsG Atu1950 AGR_C_3559	30S ribosomal protein S7	0.162638	0	0.146587
Q8UE15	fusA Atu1949 AGR_C_3558	Elongation factor G (EF-G)	0.493429	0	0.131717
Q8UE16	tufA Atu1948 AGR_C_3557; tufB Atu1966 AGR_C_3583	Elongation factor Tu (EF-Tu)	0.893305	0	0.749607
Q8UE17	rpsJ Atu1947 AGR_C_3556	30S ribosomal protein S10	0.280188	0	0.283712
Q8UE18	rplC Atu1946 AGR_C_3555	50S ribosomal protein L3	0.128524	1	0.0414375
Q8UE19	rplD Atu1945 AGR_C_3553	50S ribosomal protein L4	0.286233	0	0.124866
Q8UE20	rplW Atu1944 AGR_C_3552	50S ribosomal protein L23	1.04958	0	0.94971
Q8UE21	rplB Atu1943 AGR_C_3550	50S ribosomal protein L2	0.273569	0	0.0681422
Q8UE22	rpsS Atu1942 AGR_C_3549	30S ribosomal protein S19	0.292631	0	0.290734
Q8UE23	rplV Atu1941 AGR_C_3548	50S ribosomal protein L22	0.277437	0	0.164239
Q8UE24	rpsC Atu1940 AGR_C_3546	30S ribosomal protein S3	0.586814	0	0.165252
Q8UE25	rplP Atu1939 AGR_C_3544	50S ribosomal protein L16	0.125801	0	0.181999
Q8UE26	rpmC Atu1938 AGR_C_3543	50S ribosomal protein L29	DSM only	0	0.191565
Q8UE27	rpsQ Atu1937 AGR_C_3542	30S ribosomal protein S17	DSM only	0	0.0843483
Q8UE28	rplN Atu1936 AGR_C_3539	50S ribosomal protein L14	0.0432605	1	0.0424698
Q8UE29	rplX Atu1935 AGR_C_3538	50S ribosomal protein L24	1.3367	0	0.5811
Q8UE30	rplE Atu1934 AGR_C_3536	50S ribosomal protein L5	0.638428	0	0.443604
Q8UE32	rpsH Atu1932 AGR_C_3534	30S ribosomal protein S8	0.0972816	0	0.137506
Q8UE33	rplF Atu1931 AGR_C_3532	50S ribosomal protein L6	6.64213	0	0.174828
Q8UE34	rplR Atu1930 AGR_C_3531	50S ribosomal protein L18	0.181758	0	0.247977
Q8UE35	rpsE Atu1929 AGR_C_3528	30S ribosomal protein S5	0.13512	0	0.139414
Q8UE36	rplO Atu1928 AGR_C_3525	50S ribosomal protein L15	0.14512	0	0.21156
Q8UE39	rpsM Atu1925 AGR_C_3520	30S ribosomal protein S13	0.104341	0	0.204477
Q8UE40	rpsK Atu1924 AGR_C_3519	30S ribosomal protein S11	DSM only	0	0.131603
Q8UE41	rplQ Atu1922 AGR_C_3516	50S ribosomal protein L17	0.261887	0	0.277025
Q8UE43	ilvD Atu1918 AGR_C_3510	Dihydroxy-acid dehydratase (DAD) (EC 4.2.1.9)	DSM only	0	0.267873
Q8UE87	alaS Atu1873 AGR_C_3437	Alanine--tRNA ligase (EC 6.1.1.7) (Alanyl-tRNA synthetase) (AlaRS)	0.278203	0	0.0647764
Q8UEA0	rpsD Atu1860 AGR_C_3413	30S ribosomal protein S4	0.172245	1	0.002345
Q8UEB0	purL Atu1850 AGR_C_3393	Phosphoribosylformylglycinamidine synthase subunit PurL (FGAM synthase) (EC 6.3.5.3) (Formylglycinamide ribonucleotide amidotransferase subunit II) (FGAR amidotransferase II) (FGAR-AT II) (Glutamine amidotransferase PurL) (Phosphoribosylformylglycinamidine synthase subunit II)	1.44117	0	0.690754
Q8UEB7	purC1 Atu1843 AGR_C_3382	Phosphoribosylaminoimidazole-succinocarboxamide synthase 1 (EC 6.3.2.6) (SAICAR synthetase 1)	0.843107	0	0.518108
Q8UED2	tyrS Atu1828 AGR_C_3358	Tyrosine--tRNA ligase (EC 6.1.1.1) (Tyrosyl-tRNA synthetase) (TyrRS)	2.74153	0	0.163261
Q8UEK8	folE Atu1749 AGR_C_3211	GTP cyclohydrolase 1 (EC 3.5.4.16) (GTP cyclohydrolase I) (GTP-CH-I)	DSM only	0	0.241614
Q8UEM1	mntH Atu1736 AGR_C_3186	Divalent metal cation transporter MntH	DRM only	0	0.271715
Q8UEM4	nrdJ Atu1733 AGR_C_3183	Vitamin B12-dependent ribonucleotide reductase (EC 1.17.4.1) (Ribonucleoside-diphosphate reductase NrdJ)	0.587582	0	0.533166
Q8UEN6	valS Atu1719 AGR_C_3157	Valine--tRNA ligase (EC 6.1.1.9) (Valyl-tRNA synthetase) (ValRS)	DSM only	0	0.460138
Q8UEP4	argS Atu1711 AGR_C_3144	Arginine--tRNA ligase (EC 6.1.1.19) (Arginyl-tRNA synthetase) (ArgRS)	DSM only	0	0.304932
Q8UEP9	tatA Atu1706 AGR_C_3135	Sec-independent protein translocase protein TatA	DRM only	0	0.194445
Q8UEQ0	tatB Atu1705 AGR_C_3133	Sec-independent protein translocase protein TatB	DRM only	0	0.200857
Q8UEU0	tig Atu1664 AGR_C_3060	Trigger factor (TF) (EC 5.2.1.8) (PPIase)	0.248518	1	0.0109153
Q8UEY7	fumC Atu1616 AGR_C_2979	Fumarate hydratase class II (Fumarase C) (EC 4.2.1.2) (Aerobic fumarase) (Iron-independent fumarase)	DSM only	1	0.0498351
Q8UF86	uvrA Atu1513 AGR_C_2790	UvrABC system protein A (UvrA protein) (Excinuclease ABC subunit A)	0.852916	0	0.782649
Q8UF87	ssb Atu1512 AGR_C_2789	Single-stranded DNA-binding protein (SSB)	DSM only	0	0.18214
Q8UFA2	metG metS Atu1496 AGR_C_2757	Methionine--tRNA ligase (EC 6.1.1.10) (Methionyl-tRNA synthetase) (MetRS)	DSM only	0	0.258104
Q8UFD6	gcvP Atu1462 AGR_C_2699	Glycine dehydrogenase (decarboxylating) (EC 1.4.4.2) (Glycine cleavage system P-protein) (Glycine decarboxylase) (Glycine dehydrogenase (aminomethyl-transferring))	DSM only	1	0.0299013
Q8UFE8	hfq Atu1450 AGR_C_2673	RNA-binding protein Hfq	DSM only	0	0.20463
Q8UFH1	eno Atu1426 AGR_C_2631	Enolase (EC 4.2.1.11) (2-phospho-D-glycerate hydro-lyase) (2-phosphoglycerate dehydratase)	DSM only	1	0.0311446
Q8UFK2	lexA Atu1395 AGR_C_2577	LexA repressor (EC 3.4.21.88)	DSM only	0	0.184565
Q8UFL3	lpxA Atu1384 AGR_C_2560	Acyl-[acyl-carrier-protein]--UDP-N-acetylglucosamine O-acyltransferase (UDP-N-acetylglucosamine acyltransferase) (EC 2.3.1.129)	DSM only	1	0.0467155
Q8UFL4	fabZ Atu1383 AGR_C_2558	3-hydroxyacyl-[acyl-carrier-protein] dehydratase FabZ (EC 4.2.1.59) ((3R)-hydroxymyristoyl-[acyl-carrier-protein] dehydratase) ((3R)-hydroxymyristoyl-ACP dehydrase) (Beta-hydroxyacyl-ACP dehydratase)	DSM only	0	0.158366
Q8UFL5	lpxD Atu1382 AGR_C_2556	UDP-3-O-acylglucosamine N-acyltransferase (EC 2.3.1.-)	DSM only	0	0.0907822
Q8UFL7	Atu1380 AGR_C_2553	Putative zinc metalloprotease Atu1380 (EC 3.4.24.-)	DRM only	0	0.0750259
Q8UFM1	pyrH Atu1376 AGR_C_2544	Uridylate kinase (UK) (EC 2.7.4.22) (Uridine monophosphate kinase) (UMP kinase) (UMPK)	DSM only	0	0.281036
Q8UFM2	tsf Atu1375 AGR_C_2541	Elongation factor Ts (EF-Ts)	0.171402	0	0.209042
Q8UFM3	rpsB Atu1374 AGR_C_2539	30S ribosomal protein S2	1.67148	0	0.363298
Q8UFP1	Atu1356 AGR_C_2505	UPF0283 membrane protein Atu1356	DRM only	0	0.185384
Q8UFS8	gatA Atu1319 AGR_C_2430	Glutamyl-tRNA(Gln) amidotransferase subunit A (Glu-ADT subunit A) (EC 6.3.5.7)	DSM only	0	0.186878
Q8UFU1	plsY Atu1306 AGR_C_2402	Glycerol-3-phosphate acyltransferase (Acyl-PO4 G3P acyltransferase) (Acyl-phosphate--glycerol-3-phosphate acyltransferase) (G3P acyltransferase) (GPAT) (EC 2.3.1.275) (Lysophosphatidic acid synthase) (LPA synthase)	DRM only	0	0.239933
Q8UFU8	rpmG Atu1299 AGR_C_2389	50S ribosomal protein L33	0.16926	0	0.220606
Q8UFV7	lolD Atu1290 AGR_C_2377	Lipoprotein-releasing system ATP-binding protein LolD (EC 7.6.2.-)	DRM only	0	0.180465
Q8UFV9	proS Atu1288 AGR_C_2372	Proline--tRNA ligase (EC 6.1.1.15) (Prolyl-tRNA synthetase) (ProRS)	DSM only	0	0.179937
Q8UFW9	nuoI Atu1278 AGR_C_2355	NADH-quinone oxidoreductase subunit I (EC 7.1.1.-) (NADH dehydrogenase I subunit I) (NDH-1 subunit I)	DRM only	0	0.261025
Q8UFX0	nuoH Atu1277 AGR_C_2354	NADH-quinone oxidoreductase subunit H (EC 7.1.1.-) (NADH dehydrogenase I subunit H) (NDH-1 subunit H)	DRM only	0	0.106435
Q8UFY5	clpX Atu1259 AGR_C_2327	ATP-dependent Clp protease ATP-binding subunit ClpX	1.37589	0	0.643972
Q8UFY6	clpP2 Atu1258 AGR_C_2324	ATP-dependent Clp protease proteolytic subunit 2 (EC 3.4.21.92) (Endopeptidase Clp 2)	DSM only	0	0.199166
Q8UFZ7	rplM Atu1247 AGR_C_2301	50S ribosomal protein L13	0.0415523	1	0.0229211
Q8UFZ8	rpsI Atu1246 AGR_C_2299	30S ribosomal protein S9	0.116896	0	0.217932
Q8UG61	ihfA himA Atu1180 AGR_C_2181	Integration host factor subunit alpha (IHF-alpha)	DSM only	0	0.191565
Q8UG63	plsX Atu1178 AGR_C_2176	Phosphate acyltransferase (EC 2.3.1.274) (Acyl-ACP phosphotransacylase) (Acyl-[acyl-carrier-protein]--phosphate acyltransferase) (Phosphate-acyl-ACP acyltransferase)	DRM only	1	0.0310801
Q8UG67	hppA vppA Atu1174 AGR_C_2169	K(+)-insensitive pyrophosphate-energized proton pump (EC 7.1.3.1) (Membrane-bound proton-translocating pyrophosphatase) (Pyrophosphate-energized inorganic pyrophosphatase) (H(+)-PPase)	DRM only	1	0.0345123
Q8UG75	glyA1 Atu1165 AGR_C_2156	Serine hydroxymethyltransferase 1 (SHMT 1) (Serine methylase 1) (EC 2.1.2.1)	DSM only	1	0.0154818
Q8UG87	aspS Atu1153 AGR_C_2136	Aspartate--tRNA(Asp/Asn) ligase (EC 6.1.1.23) (Aspartyl-tRNA synthetase) (AspRS) (Non-discriminating aspartyl-tRNA synthetase) (ND-AspRS)	DSM only	0	0.305158
Q8UGA9	uvrC Atu1129 AGR_C_2088	UvrABC system protein C (Protein UvrC) (Excinuclease ABC subunit C)	DSM only	1	0.0227164
Q8UGC8	pepA Atu1110 AGR_C_2055	Probable cytosol aminopeptidase (EC 3.4.11.1) (Leucine aminopeptidase) (LAP) (EC 3.4.11.10) (Leucyl aminopeptidase)	DSM only	0	0.0784897
Q8UGD5	rsmA ksgA Atu1103 AGR_C_2042	Ribosomal RNA small subunit methyltransferase A (EC 2.1.1.182) (16S rRNA (adenine(1518)-N(6)/adenine(1519)-N(6))-dimethyltransferase) (16S rRNA dimethyladenosine transferase) (16S rRNA dimethylase) (S-adenosylmethionine-6-N', N'-adenosyl(rRNA) dimethyltransferase)	DSM only	0	0.280757
Q8UGE7	rpsF Atu1091 AGR_C_2022	30S ribosomal protein S6	0.348845	0	0.164084
Q8UGE8	rpsR Atu1090 AGR_C_2021	30S ribosomal protein S18	DSM only	0	0.188027
Q8UGF0	rplI csn1 Atu1088 AGR_C_2015	50S ribosomal protein L9 (Cultivar-specific nodulation protein 1)	0.142914	0	0.101379
Q8UGH4	psd Atu1063 AGR_C_1963	Phosphatidylserine decarboxylase proenzyme (EC 4.1.1.65) [Cleaved into: Phosphatidylserine decarboxylase alpha chain; Phosphatidylserine decarboxylase beta chain]	DRM only	0	0.21714
Q8UGK1	era Atu1036 AGR_C_1909	GTPase Era	DSM only	0	0.207831
Q8UGU0	selO Atu0945 AGR_C_1725	Protein adenylyltransferase SelO (EC 2.7.7.-) (EC 2.7.7.n1)	DSM only	0	0.379864
Q8UH55	betA Atu0830 AGR_C_1517	Oxygen-dependent choline dehydrogenase (CDH) (CHD) (EC 1.1.99.1) (Betaine aldehyde dehydrogenase) (BADH) (EC 1.2.1.8)	DRM only	0	0.063026
Q8UH62	cysA1 Atu0823 AGR_C_1506	Sulfate/thiosulfate import ATP-binding protein CysA 1 (EC 7.3.2.3) (Sulfate-transporting ATPase 1)	1.39356	0	0.615712
Q8UH73	mqo Atu0811 AGR_C_1485	Probable malate:quinone oxidoreductase (EC 1.1.5.4) (MQO) (Malate dehydrogenase [quinone])	DSM only	0	0.795941
Q8UHD7	dxs Atu0745 AGR_C_1351	1-deoxy-D-xylulose-5-phosphate synthase (EC 2.2.1.7) (1-deoxyxylulose-5-phosphate synthase) (DXP synthase) (DXPS)	DSM only	0	0.803168
Q8UHE7	Atu0735 AGR_C_1331	Uncharacterized RNA methyltransferase Atu0735 (EC 2.1.1.-)	DSM only	0	0.120247
Q8UHH1	kup1 Atu0711 AGR_C_1288	Probable potassium transport system protein kup 1	DRM only	0	0.247554
Q8UHI5	lpxK Atu0697 AGR_C_1257	Tetraacyldisaccharide 4'-kinase (EC 2.7.1.130) (Lipid A 4'-kinase)	DRM only	0	0.247495
Q8UHJ6	ileS Atu0686 AGR_C_1230	Isoleucine--tRNA ligase (EC 6.1.1.5) (Isoleucyl-tRNA synthetase) (IleRS)	DSM only	1	0.0344159
Q8UHK4	hisS Atu0676 AGR_C_1210	Histidine--tRNA ligase (EC 6.1.1.21) (Histidyl-tRNA synthetase) (HisRS)	DSM only	0	0.204741
Q8UHR0	rlmE ftsJ rrmJ Atu0620 AGR_C_1101	Ribosomal RNA large subunit methyltransferase E (EC 2.1.1.166) (23S rRNA Um2552 methyltransferase) (rRNA (uridine-2'-O-)-methyltransferase)	DSM only	0	0.3823
Q8UHW9	murA Atu0539 AGR_C_953	UDP-N-acetylglucosamine 1-carboxyvinyltransferase (EC 2.5.1.7) (Enoylpyruvate transferase) (UDP-N-acetylglucosamine enolpyruvyl transferase) (EPT)	DSM only	0	0.194873
Q8UHX4	infA Atu0534 AGR_C_945	Translation initiation factor IF-1	DSM only	0	0.199166
Q8UHX5	maf1 Atu0533 AGR_C_943	dTTP/UTP pyrophosphatase (dTTPase/UTPase) (EC 3.6.1.9) (Nucleoside triphosphate pyrophosphatase) (Nucleotide pyrophosphatase) (Nucleotide PPase)	DSM only	0	0.199553
Q8UHY0	mscL Atu0528 AGR_C_934	Large-conductance mechanosensitive channel	DRM only	0	0.23459
Q8UI24	aqpZ1 Atu0476 AGR_C_841	Aquaporin Z 1	DRM only	0	0.247554
Q8UI71	argD Atu0428 AGR_C_752	Acetylornithine aminotransferase (ACOAT) (EC 2.6.1.11)	DRM only	0	0.899663
Q8UI76	pstB Atu0423 AGR_C_743	Phosphate import ATP-binding protein PstB (EC 7.3.2.1) (ABC phosphate transporter) (Phosphate-transporting ATPase)	DRM only	0	0.051035
Q8UI94	pgi Atu0404 AGR_C_711	Glucose-6-phosphate isomerase (GPI) (EC 5.3.1.9) (Phosphoglucose isomerase) (PGI) (Phosphohexose isomerase) (PHI)	DSM only	0	0.0557109
Q8UI98	pyrE Atu0400 AGR_C_704	Orotate phosphoribosyltransferase (OPRT) (OPRTase) (EC 2.4.2.10)	DSM only	0	0.44686
Q8UIB3	yidC Atu0384 AGR_C_674	Membrane protein insertase YidC (Foldase YidC) (Membrane integrase YidC) (Membrane protein YidC)	DRM only	1	0.0277865
Q8UIB4	engB Atu0383 AGR_C_672	Probable GTP-binding protein EngB	DSM only	0	0.225133
Q8UIB7	argB Atu0380 AGR_C_666	Acetylglutamate kinase (EC 2.7.2.8) (N-acetyl-L-glutamate 5-phosphotransferase) (NAG kinase) (NAGK)	3.5321	0	0.0739866
Q8UIE8	trpS Atu0349 AGR_C_611	Tryptophan--tRNA ligase (EC 6.1.1.2) (Tryptophanyl-tRNA synthetase) (TrpRS)	DSM only	0	0.183504
Q8UIF1	glnD Atu0346 AGR_C_606	Bifunctional uridylyltransferase/uridylyl-removing enzyme (UTase/UR) (Bifunctional [protein-PII] modification enzyme) (Bifunctional nitrogen sensor protein) [Includes: [Protein-PII] uridylyltransferase (PII uridylyltransferase) (UTase) (EC 2.7.7.59); [Protein-PII]-UMP uridylyl-removing enzyme (UR) (EC 3.1.4.-)]	0.746869	0	0.384936
Q8UIF9	ihfB himD Atu0338 AGR_C_589	Integration host factor subunit beta (IHF-beta)	DSM only	0	0.199553
Q8UIH2	rpsT Atu0323 AGR_C_563	30S ribosomal protein S20	DSM only	0	0.205486
Q8UIH5	ubiE Atu0320 AGR_C_559	Ubiquinone/menaquinone biosynthesis C-methyltransferase UbiE (EC 2.1.1.163) (EC 2.1.1.201) (2-methoxy-6-polyprenyl-1,4-benzoquinol methylase) (Demethylmenaquinone methyltransferase)	DRM only	0	0.0785589
Q8UII5	gshB Atu0310 AGR_C_538	Glutathione synthetase (EC 6.3.2.3) (GSH synthetase) (GSH-S) (GSHase) (Glutathione synthase)	0.782111	0	0.656849
Q8UIN7	rplT Atu0256 AGR_C_439	50S ribosomal protein L20	0.182355	0	0.259861
Q8UIN8	rpmI Atu0255 AGR_C_437	50S ribosomal protein L35	DSM only	0	0.197589
Q8UIQ2	lepA Atu0241 AGR_C_411	Elongation factor 4 (EF-4) (EC 3.6.5.n1) (Ribosomal back-translocase LepA)	DSM only	0	0.208479
Q8UIV8	dapB Atu0183 AGR_C_307	4-hydroxy-tetrahydrodipicolinate reductase (HTPA reductase) (EC 1.17.1.8)	DSM only	0	0.101391
Q8UJ26	rpmF Atu0112 AGR_C_173	50S ribosomal protein L32	DSM only	0	0.439871
Q8UJ37	cycM Atu0101 AGR_C_155	Cytochrome c homolog	DRM only	0	0.115424
Q8UJ43	Atu0095 AGR_C_145	Nucleoid-associated protein Atu0095	DSM only	0	0.183504
Q8UJ48	rimP Atu0090 AGR_C_138	Ribosome maturation factor RimP	DSM only	0	0.296284
Q8UJ51	infB Atu0087 AGR_C_131	Translation initiation factor IF-2	0.131144	1	0.0143806
Q8UJ52	rbfA Atu0086 AGR_C_129	Ribosome-binding factor A	DSM only	0	0.180148
Q8UJ53	truB Atu0085 AGR_C_127	tRNA pseudouridine synthase B (EC 5.4.99.25) (tRNA pseudouridine(55) synthase) (Psi55 synthase) (tRNA pseudouridylate synthase) (tRNA-uridine isomerase)	DSM only	0	0.0975578
Q8UJ54	rpsO Atu0084 AGR_C_126	30S ribosomal protein S15	0.167453	0	0.238365
Q8UJ87	hslU Atu0045 AGR_C_72	ATP-dependent protease ATPase subunit HslU (Unfoldase HslU)	2.16482	0	0.423093
Q8UJ88	hslV Atu0044 AGR_C_70	ATP-dependent protease subunit HslV (EC 3.4.25.2)	DSM only	0	0.343165
Q8UJ94	pckA Atu0035 AGR_C_56	Phosphoenolpyruvate carboxykinase (ATP) (PCK) (PEP carboxykinase) (PEPCK) (EC 4.1.1.49)	0.0868287	1	0.00402478
Q8UJ99	ahcY Atu0029 AGR_C_46	Adenosylhomocysteinase (EC 3.3.1.1) (S-adenosyl-L-homocysteine hydrolase) (AdoHcyase)	DSM only	0	0.125297
Q8UJA9	trpA Atu0019 AGR_C_30	Tryptophan synthase alpha chain (EC 4.2.1.20)	DSM only	0	0.225674
Q8UJC2	secB Atu0006 AGR_C_9	Protein-export protein SecB	2.96035	0	0.256013
Q8VRG3	aopB AGTUEHA105_LOCUS811 SY94_1035	Outer membrane protein (Outer membrane protein A)	46.6605	0	0.197832
Q9KGT3	repB noc_2 AGTUEHA105_LOCUS4629 SY94_5596	Nucleoid occlusion protein (Putative chromosome-partitioning protein parB) (Putative replication protein B)	2.37266	0	0.285912
Q9R707	repB At1D1460_52000 SY94_6014	Putative replication protein B (RepB) (Replication protein B)	DRM only	0	0.308232
Q9WWD4	attL adh1_2 AGTUEHA105_LOCUS4764 SY94_5122	AttL (Long-chain-alcohol dehydrogenase 1) (Putative alcohol dehydrogenase) (EC 1.1.1.1)	0.899307	0	0.783641
Q9WWD9	atrB hemL_3 AGTUEHA105_LOCUS4751 SY94_5111	AtrB (Glutamate-1-semialdehyde 2,1-aminomutase) (EC 5.4.3.8)	2.49305	0	0.152975

## Sheet: AB medium (- vir)
Accession	Gene name(s)	Annotation	Ratio [DRM/DSM]	sig95%	t-test
A8WFE1	Atu8019	Uncharacterized protein	5.33074	0	0.0860615
A8WFE6	Atu8013	Uncharacterized protein	DRM only	0	0.194819
A9CEJ7	Atu3023	ABC transporter, membrane spanning protein (Sugar)	DRM only	0	0.42265
A9CEJ8	Atu3024	ABC transporter, membrane spanning protein (Sugar)	DRM only	0	0.12974
A9CEK4	Atu3032	Uncharacterized protein	0.45383	0	0.0578019
A9CEK6	Atu3038	ABC transporter, nucleotide binding/ATPase protein (Dipeptide)	DRM only	0	0.657756
A9CEL3	Atu3051	Agropine synthesis reductase	DRM only	0	0.42265
A9CEL6	Atu3060	ABC transporter, nucleotide binding/ATPase protein	DRM only	0	0.825232
A9CEL7	Atu3061	GGDEF family protein	DRM only	0	0.415731
A9CEM1	Atu3066	Resiniferatoxin-binding, phosphotriesterase-related protein	DSM only	0	0.196334
A9CEM5	Atu3074	Short chain dehydrogenase	DRM only	1	0.00727376
A9CEN4	mcpA Atu3094	Methyl-accepting chemotaxis protein	DRM only	0	0.545555
A9CEP0	Atu3103	ABC transporter, nucleotide binding/ATPase protein (Sugar)	1.3429	0	0.567608
A9CEP2	celI Atu3105	HTH arsR-type domain-containing protein	DRM only	0	0.225247
A9CEQ7	Atu3138	D-galactarolactone isomerase (GLI) (EC 5.4.1.4) (Galactaro delta-lactone isomerase)	DRM only	0	0.644333
A9CEQ8	gci Atu3139	D-galactarolactone cycloisomerase (EC 5.5.1.27)	DSM only	0	0.196334
A9CER0	Atu3144	Transcriptional regulator, GntR family	DSM only	0	0.22987
A9CER3	Atu3147	Oxidoreductase	1.03813	0	0.952768
A9CER5	Atu3151	ABC transporter, substrate binding protein (Sugar)	DRM only	0	0.949438
A9CES2	Atu3161	SAF domain-containing protein	DSM only	0	0.875004
A9CES9	Atu3170	ABC transporter, nucleotide binding/ATPase protein (Sorbitol/mannitol)	0.874297	0	0.67856
A9CET0	Atu3171	ABC transporter, nucleotide binding/ATPase protein (Sugar)	DRM only	1	0.00158371
A9CET7	Atu3178	ABC transporter, substrate binding protein	0.715925	0	0.235347
A9CET8	Atu3180	ABC transporter, nucleotide binding/ATPase protein	2.22065	0	0.0761106
A9CEU0	Atu3184	CobW C-terminal domain-containing protein	DRM only	1	0.0323032
A9CEU3	Atu3191	Outer membrane protein	DRM only	1	0.0130045
A9CEU7	Atu3200	ABC transporter, nucleotide binding/ATPase protein (Ribose)	1.4907	0	0.562736
A9CEU8	Atu3202	Efflux pump membrane transporter	4.07001	0	0.299371
A9CEU9	Atu3204	GGDEF family protein	2.0235	0	0.170446
A9CEV4	Atu3216	ABC transporter, nucleotide binding/ATPase protein (Oligopeptide)	DRM only	0	0.256824
A9CEV6	ilvD Atu3219	Dihydroxy-acid dehydratase	0.11618	0	0.152791
A9CEV8	Atu3222	ABC transporter, substrate binding protein (Ribose)	DSM only	0	0.711035
A9CEW3	Atu3229	UmuC domain-containing protein	DRM only	0	0.42265
A9CEW4	Atu3234	NAD binding oxidoreductase	DSM only	0	0.174132
A9CEW7	Atu3239	ABC transporter, substrate binding protein (Sugar)	DRM only	0	0.199381
A9CEW9	Atu3244	GGDEF family protein	DSM only	0	0.31468
A9CEX2	minD Atu3248	Cell division inhibitor MinD (Septum site-determining protein MinD)	DRM only	0	0.849074
A9CEX3	Atu3251	Haloacid dehalogenase-like hydrolase	DRM only	0	0.331755
A9CEX6	Atu3254	ABC transporter, nucleotide binding/ATPase protein (Dicarboxylate)	DRM only	1	0.0202669
A9CEX8	Atu3259	Dehydrogenase	0.715311	0	0.57014
A9CEY0	Atu3262	ABC transporter, nucleotide binding/ATPase protein	DRM only	0	0.533679
A9CEY4	Atu3274	AcrB/AcrD/AcrF family protein	9.82628	0	0.151801
A9CEY9	Atu3282	ABC transporter, substrate binding protein (Sugar)	DRM only	0	0.42265
A9CEZ0	Atu3285	Glycosidase	0.861354	0	0.815728
A9CEZ1	Atu3286	ABC transporter, membrane spanning protein	DRM only	1	0.0130009
A9CEZ2	thiD Atu3290	Phosphomethylpyrimidine kinase	DRM only	0	0.184884
A9CEZ3	dctD Atu3296	Two component response regulator for C4-dicarboxylate transport	DRM only	0	0.256824
A9CEZ5	fixR Atu3301	Short-chain alcohol dehydrogenase	DRM only	0	0.142259
A9CEZ7	celA Atu3309	Cellulose synthase catalytic subunit [UDP-forming] (EC 2.4.1.12)	DRM only	0	0.42265
A9CF04	exoQ Atu3325	Exopolysaccharide production protein	DRM only	1	0.00158371
A9CF05	exoF Atu3326	Exopolysaccharide production protein	0.181062	1	0.01552
A9CF07	bioA Atu3329	Adenosylmethionine-8-amino-7-oxononanoate aminotransferase	DSM only	0	0.366473
A9CF08	Atu3331	YkuD domain-containing protein	DRM only	1	0.0158959
A9CF13	thuK Atu3341	ABC transporter, nucleotide binding/ATPase protein (Trehalose/maltose)	1.83642	0	0.232552
A9CF15	ThuB Atu3343	Trehalose utilization-related protein	2.67378	0	0.220309
A9CF19	Atu3349	ABC transporter, nucleotide binding/ATPase protein	DRM only	0	0.18791
A9CF23	manC Atu3353	Mannose-1-phosphate guanylyltransferase (EC 2.7.7.13)	DRM only	0	0.42265
A9CF24	Atu3354	Pyrroloquinoline-quinone-dependent quinate dehydrogenase	20.0283	1	0.0426969
A9CF25	Atu3356	NADP-dependent malic enzyme	DSM only	0	0.067723
A9CF26	Atu3359	ABC transporter, membrane spanning protein (Amino acid)	DRM only	0	0.0979307
A9CF27	Atu3361	Uncharacterized protein	0.723172	0	0.695649
A9CF28	Atu3362	Monooxygenase	DRM only	0	0.369977
A9CF30	Atu3364	D-amino acid dehydrogenase	5.6158	0	0.15488
A9CF31	Atu3366	Tripartite ATP-independent periplasmic transporter, DctQ component	DRM only	0	0.28229
A9CF33	Atu3368	Periplasmic mannitol-binding protein	0.218212	0	0.111083
A9CF35	Atu3370	ABC transporter, membrane spanning protein (Sugar)	0.41049	0	0.494656
A9CF37	Atu3375	ABC transporter, substrate binding protein (Peptide)	DRM only	0	0.42265
A9CF38	Atu3377	ABC transporter, nucleotide binding/ATPase protein (Peptide)	0.827806	0	0.854289
A9CF41	Atu3381	Transcriptional regulator, LysR family	DRM only	0	0.26229
A9CF42	prsD Atu3383	Rhizobicin secretion	DRM only	0	0.237794
A9CF44	Atu3386	Two component sensor kinase	DSM only	0	0.26027
A9CF48	Atu3390	ABC transporter, substrate binding protein (Iron)	DRM only	0	0.213858
A9CF51	fecE Atu3394	ABC transporter, nucleotide binding/ATPase protein (Iron)	4.28137	0	0.0608785
A9CF53	Atu3396	ABC transporter, substrate binding protein (Iron)	2.41053	1	0.0453895
A9CF57	ordL Atu3404	Oxidoreductase	DRM only	0	0.441227
A9CF58	Atu3407	Aminotransferase, class III	DSM only	0	0.542676
A9CF59	hadL Atu3408	2-haloalkanoic acid dehalogenase	DSM only	0	0.883209
A9CF60	Atu3409	ABC transporter, substrate binding protein (Oligopeptide)	DSM only	0	0.50992
A9CF63	Atu3412	ABC transporter, nucleotide binding/ATPase protein	DRM only	0	0.232124
A9CF75	Atu3437	ABC transporter, nucleotide binding/ATPase protein (Oligopeptide)	DSM only	0	0.18396
A9CF76	Atu3438	Putative oxidoreductase	DSM only	0	0.134559
A9CF92	Atu3461	Transcriptional regulator, GntR family	1.00358	0	0.994287
A9CFA3	acd Atu3477	Acyl-CoA dehydrogenase	DRM only	0	0.42265
A9CFA4	Atu3484	AP_endonuc_2 domain-containing protein	DRM only	0	0.871489
A9CFA5	Atu3486	Transcriptional regulator, DeoR family	DRM only	0	0.312176
A9CFA6	Atu3487	Autoinducer 2-binding protein LsrB	DRM only	0	0.139931
A9CFA9	Atu3493	Non-heme haloperoxidase	DSM only	0	0.281183
A9CFB0	Atu3494	Methyltransf_21 domain-containing protein	DRM only	0	0.98477
A9CFB1	Atu3495	GGDEF family protein	DRM only	0	0.0585855
A9CFC0	Atu3525	Uncharacterized protein	DSM only	0	0.222923
A9CFC7	Atu3536	ABC transporter, nucleotide binding/ATPase protein	DRM only	0	0.42265
A9CFD4	Atu3546	Uncharacterized protein	8.62794	1	0.000729597
A9CFD9	Atu3560	Glycosyltransferase	DSM only	0	0.423443
A9CFE2	Atu3569	Uncharacterized protein	DSM only	0	0.201036
A9CFE4	Atu3572	Transcriptional regulator, HTH family	0.291307	0	0.194328
A9CFE6	xylG Atu3574	ABC transporter, nucleotide binding/ATPase protein (Xylose)	4.20654	1	0.00787847
A9CFE7	xylF Atu3576	ABC transporter, substrate binding protein (Xylose)	0.267654	1	0.0345598
A9CFE8	mutA Atu3580	Methylmalonyl-CoA mutase	0.457021	0	0.575417
A9CFF0	Atu3590	Transporter	DRM only	0	0.42265
A9CFF1	etfB Atu3595	Electron transfer flavoprotein beta subunit	0.12589	0	0.0697757
A9CFF2	hbdA Atu3597	3-hydroxybutyryl-CoA dehydrogenase	3.22252	0	0.152511
A9CFF3	dsbE Atu3598	Thiol:disulfide interchange protein	1.40767	0	0.32221
A9CFF4	Atu3600	Uncharacterized protein	DRM only	0	0.137156
A9CFF8	ftsE Atu3606	Cell division ATP-binding protein FtsE	8.04426	0	0.0576696
A9CFF9	ftsX Atu3607	Cell division protein	10.8031	1	0.047393
A9CFG0	Atu3608	DUF218 domain-containing protein	11.121	1	0.0201806
A9CFG1	plsC Atu3609	1-acyl-sn-glycerol-3-phosphate acyltransferase	9.25479	1	0.00650764
A9CFG5	Atu3620	Phytase-like domain-containing protein	DRM only	0	0.0846276
A9CFG6	cobT Atu3621	Cobyrinic acid synthase	1.74218	0	0.260074
A9CFG7	cobS Atu3622	Cobalamin biosynthesis protein	1.73271	0	0.154827
A9CFH0	Atu3633	CobW C-terminal domain-containing protein	4.8854	0	0.106791
A9CFH1	Atu3636	Uncharacterized protein	DRM only	0	0.42265
A9CFH2	Atu3640	Uncharacterized protein	7.08976	0	0.21571
A9CFH3	Atu3641	DUF2169 domain-containing protein	DRM only	0	0.102684
A9CFH4	Atu3643	Uncharacterized protein	DRM only	0	0.7454
A9CFH8	Atu3652	BAAT_C domain-containing protein	1.32736	0	0.83533
A9CFI1	Atu3661	Uncharacterized protein	DRM only	0	0.649324
A9CFI6	Atu3672	Polyketide synthase, siderophore biosynthesis protein	1.28264	0	0.660695
A9CFI7	Atu3675	Peptide synthetase, siderophore biosynthesis protein	4.67216	1	0.00617364
A9CFI8	Atu3676	Putative siderophore biosynthesis protein	DRM only	0	0.42265
A9CFJ1	Atu3682	Non-ribosomal peptide synthetase, siderophore biosynthesis protein	1.24017	0	0.697129
A9CFJ2	Atu3684	Siderophore biosynthesis protein	DRM only	0	0.161885
A9CFK0	serA Atu3706	D-3-phosphoglycerate dehydrogenase (EC 1.1.1.95)	1.4282	0	0.142978
A9CFK1	serC Atu3707	Phosphoserine transaminase (EC 2.6.1.52)	0.629048	0	0.526746
A9CFK2	tolA Atu3715	Uncharacterized protein	1.07167	0	0.9517
A9CFK3	tolR Atu3716	TolR protein	8.9425	1	0.0416684
A9CFK5	Atu3726	Flavin dependant oxidoreductase	DSM only	0	0.326176
A9CFK7	Atu3730	Uncharacterized protein	DRM only	0	0.42265
A9CFK9	tktA Atu3736	Transketolase (EC 2.2.1.1)	0.285956	0	0.171297
A9CFL0	gapA Atu3737	Glyceraldehyde-3-phosphate dehydrogenase (EC 1.2.1.-)	0.315702	1	0.0350175
A9CFL1	Atu3740	Fructose-bisphosphate aldolase (EC 4.1.2.13)	0.684753	0	0.673786
A9CFL2	Atu3741	MFS permease	DRM only	0	0.0569099
A9CFL3	Atu3744	ABC transporter, nucleotide binding/ATPase protein	12.0623	0	0.0687697
A9CFL4	Atu3745	FAD_binding_2 domain-containing protein	2.33194	0	0.345442
A9CFL5	suhB Atu3748	Inositol-1-monophosphatase (EC 3.1.3.25)	DSM only	0	0.159991
A9CFL6	Atu3751	Probable membrane transporter protein	DRM only	1	0.00906239
A9CFL8	purE Atu3754	N5-carboxyaminoimidazole ribonucleotide mutase (N5-CAIR mutase) (EC 5.4.99.18) (5-(carboxyamino)imidazole ribonucleotide mutase)	DSM only	1	0.0199717
A9CFL9	Atu3757	TPR_REGION domain-containing protein	DRM only	0	0.237794
A9CFM1	pykA Atu3762	Pyruvate kinase (EC 2.7.1.40)	0.602337	0	0.347703
A9CFM2	Atu3764	Sigma 54 dependent transcriptional activator	2.28469	0	0.365508
A9CFM4	Atu3768	Homospermidine synthase	DSM only	1	0.0174189
A9CFM5	Atu3772	PHB domain-containing protein	1.96532	0	0.0817101
A9CFM6	Atu3773	NfeD domain-containing protein	1.81457	0	0.0926465
A9CFM8	galU Atu3778	UTP--glucose-1-phosphate uridylyltransferase (EC 2.7.7.9) (UDP-glucose pyrophosphorylase)	0.545596	0	0.257997
A9CFM9	mltB Atu3779	Lytic murein transglycosylase	DRM only	0	0.168868
A9CFN2	ald Atu3785	L-threonine aldolase (EC 4.1.2.48)	DSM only	0	0.0736322
A9CFN3	kdpE Atu3786	Two component response regulator	3.2376	0	0.14589
A9CFN5	ansP Atu3792	L-asparagine permease	DRM only	0	0.0708665
A9CFN7	Atu3795	AcrB/AcrD/AcrF family protein	0.733	0	0.217758
A9CFN8	Atu3796	Efflux protein	DRM only	1	0.0300812
A9CFN9	Atu3797	HlyD family secretion protein	DRM only	1	0.0180532
A9CFP0	proV Atu3802	ABC transporter, nucleotide binding/ATPase protein (Proline/glycine betaine)	DRM only	0	0.225884
A9CFP1	hutH Atu3803	Histidine ammonia-lyase	DRM only	0	0.910908
A9CFP7	Atu3810	Transcriptional regulator, LysR family	DRM only	0	0.228697
A9CFP8	Atu3811	Hydrolase	DRM only	0	0.703618
A9CFP9	Atu3812	Uncharacterized protein	DRM only	0	0.410473
A9CFQ1	Atu3817	Dehydratase	DRM only	0	0.42265
A9CFQ4	metE Atu3823	5-methyltetrahydropteroyltriglutamate-homocysteine methyltransferase	2.2338	0	0.344886
A9CFQ6	Atu3827	HTH-type transcriptional regulator MetR	DSM only	0	0.23135
A9CFR1	Atu3832	Uncharacterized protein	0.924614	0	0.945147
A9CFR4	Atu3835	Uncharacterized protein	DSM only	0	0.421916
A9CFR5	Atu3842	Uncharacterized protein	3.15665	0	0.481322
A9CFR6	Atu3844	Uncharacterized protein	DRM only	0	0.42265
A9CFR8	Atu3860	Chitooligosaccharide deacetylase (Nodulation protein B)	5.37625	0	0.277506
A9CFS0	Atu3866	Alpha-E domain-containing protein	0.582562	0	0.666766
A9CFS2	lldA Atu3871	L-lactate dehydrogenase	0.488183	0	0.144548
A9CFS7	Atu3884	Uncharacterized protein	0.525686	0	0.482519
A9CFS8	pldB Atu3886	Lysophospholipase	9.00606	1	0.0130293
A9CFS9	hspL Atu3887	Small heat shock protein	0.231064	1	0.00795246
A9CFT0	Atu3888	Uncharacterized protein	DRM only	0	0.184919
A9CFT2	Atu3891	Uncharacterized protein	DRM only	0	0.182487
A9CFT5	Atu3895	ABC transporter, nucleotide binding/ATPase protein (Sugar)	3.69906	0	0.512037
A9CFT6	Atu3896	ABC transporter, nucleotide binding/ATPase protein (Sugar)	DRM only	1	0.0300935
A9CFT7	glpD Atu3897	Glycerol-3-phosphate dehydrogenase (EC 1.1.5.3)	DRM only	0	0.0728845
A9CFU1	Atu3913	Biotin carboxylase	0.594653	0	0.614479
A9CFU3	repB Atu3923	Replication protein B	4.66611	1	0.0238196
A9CFU4	Atu3925	Uncharacterized protein	DSM only	0	0.782918
A9CFU7	Atu3930	AB hydrolase-1 domain-containing protein	DRM only	0	0.404119
A9CFU9	Atu3952	Oxidoreductase	0.326872	0	0.246888
A9CFV4	dapA Atu3960	Dihydrodipicolinate synthase	DRM only	0	0.330409
A9CFV6	Atu3965	Oxidoreductase	DSM only	0	0.18396
A9CFV8	Atu3967	ABC transporter, substrate binding protein (Sugar)	8.77173	1	0.00452116
A9CFW0	ilvD Atu3971	Dihydroxy-acid dehydratase	DSM only	0	0.22987
A9CFW2	Atu3973	Uncharacterized protein	DRM only	0	0.42265
A9CFW8	proC Atu3985	Pyrroline-5-carboxylate reductase	DRM only	0	0.299711
A9CFX3	copB Atu3992	Copper tolerance protein	2.15491	0	0.507216
A9CFX6	bioF Atu3998	8-amino-7-oxononanoate synthase	DRM only	0	0.142419
A9CFY2	idhA Atu4012	Myo-inositol 2-dehydrogenase	DRM only	0	0.225247
A9CFY3	cyaA Atu4013	Putative adenylate cyclase	9.93903	0	0.202362
A9CFY5	Atu4019	Two component response regulator	DSM only	0	0.194231
A9CFY6	Atu4020	Uncharacterized protein	38.8055	1	0.0317835
A9CFY8	Atu4026	Uncharacterized protein	2.92599	0	0.243517
A9CFZ0	Atu4030	ABC transporter, membrane spanning protein (Sugar)	DRM only	1	0.0249756
A9CFZ1	Atu4031	ABC transporter, membrane spanning protein (Sugar)	DRM only	0	0.19912
A9CFZ2	Atu4032	ABC transporter, nucleotide binding/ATPase protein (Sugar)	1.53665	0	0.166829
A9CFZ3	Atu4033	ABC transporter, substrate binding protein (Sugar)	0.545437	1	0.00175547
A9CFZ4	Atu4036	DNA topoisomerase	DRM only	0	0.0763605
A9CFZ7	Atu4043	Uncharacterized protein	DRM only	0	0.616434
A9CFZ8	Atu4046	ABC transporter, substrate binding protein (Glycine betaine)	DRM only	0	0.184884
A9CFZ9	exoP Atu4049	Exopolysaccharide polymerization/transport protein	5.23999	1	0.00562447
A9CG00	exoN Atu4050	Alpha-D-glucosyl-1-phosphate uridylyltransferase (EC 2.7.7.9) (UDP-glucose pyrophosphorylase) (UTP--glucose-1-phosphate uridylyltransferase) (Uridine diphosphoglucose pyrophosphorylase)	DRM only	0	0.262268
A9CG01	exoO Atu4051	Succinoglycan biosynthesis glycosyltransferase	9.7177	1	3.42736e-05
A9CG02	exoM Atu4052	UDP-hexose transferase	2.77398	0	0.0696597
A9CG03	exoL Atu4054	Succinoglycan biosynthesis protein	2.99788	1	0.0430739
A9CG07	soxD Atu4068	Sarcosine oxidase delta subunit	0.196635	0	0.128561
A9CG08	soxA Atu4069	Sarcosine oxidase subunit alpha (EC 1.5.3.1)	0.339201	1	0.00966374
A9CG09	soxG Atu4070	Sarcosine oxidase gamma subunit	0.501416	0	0.194764
A9CG12	glgX Atu4073	Glycogen debranching enzyme	DSM only	0	0.589446
A9CG13	glgP Atu4078	Alpha-1,4 glucan phosphorylase (EC 2.4.1.1)	1.19316	0	0.690738
A9CG16	garR Atu4085	2-hydroxy-3-oxopropionate reductase	0.323349	0	0.456691
A9CG19	cydC Atu4090	ABC transporter, nucleotide binding/ATPase protein	DRM only	0	0.572687
A9CG20	cydA Atu4091	Cytochrome d oxidase	DRM only	1	0.0299805
A9CG21	cydB Atu4092	Cytochrome d oxidase subunit II	DRM only	0	0.281457
A9CG22	Atu4094	DUF3597 domain-containing protein	DSM only	0	0.175652
A9CG31	dppA Atu4113	ABC transporter, substrate binding protein (Dipeptide)	0.537081	0	0.202391
A9CG32	dppB Atu4114	ABC transporter, membrane spanning protein (Dipeptide)	DRM only	0	0.192287
A9CG33	dppC Atu4115	ABC transporter, membrane spanning protein (Dipeptide)	DRM only	0	0.0535643
A9CG34	dppD Atu4116	ABC transporter, nucleotide binding/ATPase protein (Dipeptide)	0.919257	0	0.825297
A9CG35	dppF Atu4117	ABC transporter, nucleotide binding/ATPase protein (Dipeptide)	3.66387	1	0.0323279
A9CG37	Atu4122	Transcriptional regulator, LysR family	DRM only	0	0.572208
A9CG40	Atu4125	ABC transporter, nucleotide binding/ATPase protein (Branched chain amino acid)	DRM only	0	0.10808
A9CG43	Atu4128	GMC type oxidoreductase	0.417421	0	0.199254
A9CG45	acsA Atu4130	Acetoacetyl-CoA synthetase	DRM only	0	0.42265
A9CG47	gcd Atu4135	Glucose dehydrogenase	18.8778	1	0.00317704
A9CG52	Atu4140	Uncharacterized protein	DSM only	0	0.338828
A9CG55	lspL Atu4148	UDP-glucuronic acid epimerase	1.44145	0	0.505216
A9CG56	ugdH Atu4149	UDP-glucose 6-dehydrogenase (EC 1.1.1.22)	3.2381	0	0.0703586
A9CG59	putA Atu4157	Bifunctional protein PutA [Includes: Proline dehydrogenase (EC 1.5.5.2) (Proline oxidase); Delta-1-pyrroline-5-carboxylate dehydrogenase (P5C dehydrogenase) (EC 1.2.1.88) (L-glutamate gamma-semialdehyde dehydrogenase)]	0.57688	0	0.457866
A9CG61	Atu4160	RNA polymerase sigma factor	0.236739	0	0.0556417
A9CG63	Atu4165	PRC domain-containing protein	DSM only	0	0.187792
A9CG65	nspC Atu4169	Carboxynorspermidine/carboxyspermidine decarboxylase (CANS DC/CAS DC) (CANSDC/CASDC) (EC 4.1.1.96)	0.206952	1	0.0216437
A9CG67	deaD Atu4171	Cold-shock dead-box protein A	2.51305	0	0.191618
A9CG68	lysC Atu4172	Aspartokinase (EC 2.7.2.4)	0.667009	0	0.545166
A9CG69	ptsI Atu4173	Phosphoenolpyruvate--protein phosphotransferase (EC 2.7.3.9)	1.39023	0	0.672418
A9CG70	prmC hemK Atu4175	Release factor glutamine methyltransferase (RF MTase) (EC 2.1.1.297) (N5-glutamine methyltransferase PrmC) (Protein-(glutamine-N5) MTase PrmC) (Protein-glutamine N-methyltransferase PrmC)	DRM only	0	0.246892
A9CG71	Atu4178	Peptidase_M23 domain-containing protein	DRM only	0	0.198992
A9CG74	Atu4196	MR_MLE domain-containing protein	0.370925	0	0.335663
A9CG75	Atu4197	Uncharacterized protein	DSM only	0	0.613397
A9CG86	Atu4220	Short-chain dehydrogenase	DRM only	0	0.718183
A9CG87	Atu4221	Uncharacterized protein	DRM only	0	0.42265
A9CG88	soxA Atu4222	Sarcosine oxidase subunit alpha (EC 1.5.3.1)	DRM only	0	0.42265
A9CG90	soxB Atu4224	Sarcosine oxidase beta subunit	0.417917	0	0.42414
A9CG91	glxA Atu4225	Transcriptional regulator, AraC family	DSM only	0	0.503291
A9CGA9	attK Atu4247	Aldehyde dehydrogenase	DRM only	0	0.183504
A9CGB5	Atu4258	ABC transporter, membrane spanning protein (Oligopeptide)	DRM only	1	0.017639
A9CGB6	Atu4259	ABC transporter, substrate binding protein (Oligopeptide)	0.740342	0	0.663971
A9CGC9	Atu4276	AHS2 domain-containing protein	DSM only	0	0.42414
A9CGD4	Atu4284	ABC transporter, substrate binding protein (Amino acid)	DRM only	0	0.919849
A9CGE0	Atu4296	Dehydrogenase	DRM only	0	0.177245
A9CGE9	soxA Atu4312	Sarcosine oxidase subunit alpha (EC 1.5.3.1)	DRM only	1	0.0487617
A9CGF3	rbsB Atu4320	ABC transporter, substrate binding protein (Ribose)	1.06808	0	0.842079
A9CGF5	rdh Atu4323	Ribitol 2-dehydrogenase	5.53641	0	0.178826
A9CGF6	Atu4324	Ribitol kinase	DSM only	0	0.339367
A9CGF8	bexD Atu4329	Polysaccharide export protein	2.00847	1	0.0254835
A9CGF9	impL Atu4332	IcmF family protein	3.85728	1	0.0489851
A9CGG0	impJ Atu4334	Uncharacterized protein	0.493898	0	0.0518632
A9CGG1	impI Atu4335	Putative forkhead-type phosphopeptide-binding protein	1.74899	0	0.453987
A9CGG2	impH Atu4336	Uncharacterized protein	DRM only	0	0.225247
A9CGG3	impG Atu4337	Uncharacterized protein	5.80322	0	0.255821
A9CGG5	impC Atu4341	Uncharacterized protein	1.49133	0	0.140744
A9CGG6	impB Atu4342	Uncharacterized protein	1.2907	0	0.718596
A9CGG7	impA Atu4343	ImpA_N domain-containing protein	5.12504	0	0.10968
A9CGG8	Atu4345	Uncharacterized protein	12.5982	0	0.223642
A9CGG9	Atu4346	Rap1a domain-containing protein	DSM only	0	0.293727
A9CGH0	vgrG Atu4348	VgrG protein	1.10954	0	0.688544
A9CGH1	Atu4350	Ntox15 domain-containing protein	0.460663	0	0.217121
A9CGH2	Atu4352	Uncharacterized protein	DRM only	0	0.184884
A9CGI0	Atu4361	ABC transporter, substrate binding protein (Sugar)	DSM only	0	0.393528
A9CGI3	thuR Atu4364	Transcriptional regulator, LacI family	DSM only	0	0.190419
A9CGI9	Atu4375	Uncharacterized protein	DRM only	0	0.065763
A9CGJ7	norD Atu4386	Nitric oxide reductase NorD protein	DRM only	0	0.764707
A9CGK2	Atu4394	Uncharacterized protein	DSM only	0	0.239545
A9CGK7	Atu4400	Ferrienterobactin-like protein	DRM only	0	0.401231
A9CGL6	napC Atu4410	Cytochrome c-type protein	DRM only	0	0.396666
A9CGL7	Atu4416	4'-phosphopantetheinyl transferase EntD (Enterobactin synthase component D) (Enterochelin synthase D)	DRM only	0	0.42265
A9CGL8	gcdH Atu4418	Glutaryl-CoA dehydrogenase	0.404507	0	0.412355
A9CGM0	Atu4421	ABC transporter, substrate binding protein (Spermidine/putrescine)	6.01873	1	0.0195852
A9CGM1	Atu4422	ABC transporter, membrane spanning protein (Spermidine/putrescine)	DRM only	0	0.282062
A9CGM2	Atu4423	ABC transporter, membrane spanning protein	2.67964	1	0.00714381
A9CGM3	Atu4424	ABC transporter, nucleotide binding/ATPase protein (Spermidine/putrescine)	0.913651	0	0.646606
A9CGM8	Atu4431	ABC transporter, substrate binding protein (Oligopeptide)	0.750251	0	0.217234
A9CGM9	Atu4432	ABC transporter, membrane spanning protein (Oligopeptide)	DRM only	0	0.0748833
A9CGN0	Atu4433	ABC transporter, membrane spanning protein (Oligopeptide)	DRM only	0	0.175394
A9CGN1	Atu4434	ABC transporter, nucleotide binding/ATPase protein (Oligopeptide)	3.26414	1	0.00586065
A9CGN2	Atu4435	ABC transporter, nucleotide binding/ATPase protein (Oligopeptide)	2.51855	0	0.145792
A9CGN3	Atu4438	ABC transporter, substrate binding protein (Oligopeptide)	2.54421	0	0.119136
A9CGN4	Atu4439	ABC transporter, membrane spanning protein (Oligopeptide)	DRM only	0	0.208868
A9CGN7	Atu4442	DJ-1_PfpI domain-containing protein	0.67982	0	0.243635
A9CGN9	Atu4445	ABC transporter, nucleotide binding/ATPase protein	DRM only	0	0.233293
A9CGP2	Atu4450	ABC transporter, nucleotide binding/ATPase protein (Sugar)	DSM only	0	0.582353
A9CGP6	Atu4456	Uncharacterized protein	13.9235	1	0.0194717
A9CGP8	ada Atu4459	6-O-methylguanine-DNA methyltransferase	2.70749	0	0.26226
A9CGQ2	sitD Atu4468	ABC transporter, membrane spanning protein (Iron transport)	DRM only	1	0.00107232
A9CGQ7	Atu4481	Transcriptional regulator, LacI family	DRM only	1	0.0199796
A9CGQ8	Atu4488	ABC transporter, membrane spanning protein	DRM only	1	0.0309231
A9CGQ9	Atu4489	Outer membrane lipoprotein	0.643385	0	0.093118
A9CGR1	Atu4498	Nickel/cobalt efflux system	DRM only	0	0.0806414
A9CGR2	Atu4501	ANAPC4_WD40 domain-containing protein	1.00896	0	0.99285
A9CGR3	cobW Atu4502	Cobalamin synthesis protein	1.74565	0	0.100444
A9CGR4	Atu4503	Creatinine amidohydrolase	DRM only	0	0.22556
A9CGR6	Atu4507	Dehydrogenase	DSM only	0	0.272847
A9CGS0	iolD Atu4511	Acetolactate synthase	DSM only	0	0.166912
A9CGS6	Atu4524	ABC transporter, membrane spanning protein (Oligopeptide)	DRM only	0	0.0694316
A9CGS7	Atu4525	ABC transporter, substrate binding protein (Oligopeptide)	2.7389	1	0.00951939
A9CGS8	Atu4526	ABC transporter, nucleotide binding/ATPase protein	2.8444	0	0.121358
A9CGT7	iolH Atu4553	Myo-inositol catabolism protein	DRM only	0	0.42265
A9CGT9	Atu4562	Uncharacterized protein	DRM only	0	0.178242
A9CGU0	Atu4566	Serine protease	DSM only	0	0.623857
A9CGU5	Atu4579	ABC transporter, membrane spanning protein	DRM only	0	0.98477
A9CGV0	Atu4587	Uncharacterized protein	DRM only	0	0.129796
A9CGV2	Atu4591	Transcriptional regulator, LysR family	DRM only	0	0.42265
A9CGV5	Atu4596	NMT1 domain-containing protein	1.25729	0	0.790595
A9CGV8	Atu4600	ABC transporter, nucleotide binding/ATPase protein	9.19318	1	0.0160715
A9CGW2	Atu4608	Glyco_trans_2-like domain-containing protein	1.71235	0	0.439176
A9CGW4	Atu4610	Sugar nucleotide epimerase/dehydratase	DRM only	0	0.151924
A9CGW5	wbbL Atu4614	Glycosyltransferase	8.33985	0	0.126481
A9CGW6	rfbD Atu4616	dTDP-4-dehydrorhamnose reductase (EC 1.1.1.133)	2.49555	1	0.0447847
A9CGW8	dppF Atu4620	ABC transporter, nucleotide binding/ATPase protein (Dipeptide)	DSM only	0	0.72573
A9CGX3	Atu4632	3'-phosphoesterase (EC 6.5.1.1) (DNA repair polymerase) (NHEJ DNA polymerase) (Polydeoxyribonucleotide synthase [ATP]) (Polymerase/primase)	DRM only	0	0.43096
A9CGX5	Atu4634	Uncharacterized protein	1.56671	0	0.311111
A9CGX9	oxyR Atu4641	Transcriptional regulator, LysR family	2.21931	0	0.148521
A9CGY1	vdh Atu4645	Vanillin: NAD oxidoreductase (Putative)	6.47268	1	0.0130214
A9CGY3	betC Atu4648	Choline sulfatase	DSM only	0	0.153772
A9CGY4	Atu4650	ABC transporter, nucleotide binding/ATPase protein (Sugar)	DRM only	0	0.222711
A9CGY7	Atu4654	ABC transporter, substrate binding protein (Sugar)	DRM only	0	0.42265
A9CGY9	agpT Atu4659	Transcriptional regulator, AraC family	0.842245	0	0.81879
A9CGZ0	Atu4662	ABC transporter, membrane spanning protein (Oligopeptide )	DRM only	0	0.42265
A9CGZ1	Atu4666	HlyD family secretion protein	26.2722	1	0.01367
A9CGZ2	Atu4668	ABC transporter, membrane spanning protein	DRM only	0	0.628975
A9CGZ3	ftsZ1 ftsZ Atu4673	Cell division protein FtsZ	2.30947	1	0.0129723
A9CGZ4	dapA Atu4675	Dihydrodipicolinate synthase	DSM only	0	0.387524
A9CGZ5	Atu4678	ABC transporter, substrate binding protein (Amino acid)	DSM only	1	0.0347845
A9CGZ7	Atu4680	ABC transporter, membrane spanning protein (Amino acid)	DRM only	0	0.237794
A9CGZ8	Atu4681	ABC transporter, nucleotide binding/ATPase protein (Amino acid)	3.91004	0	0.0530839
A9CGZ9	dadA Atu4682	D-amino acid dehydrogenase, small subunit	DRM only	0	0.415725
A9CH00	Atu4683	Probable 2-methyl-cis-aconitate hydratase	DRM only	0	0.42265
A9CH01	Atu4684	Trans-3-hydroxy-L-proline dehydratase (T3LHyp dehydratase) (t3HypD) (EC 4.2.1.77) (4-hydroxyproline 2-epimerase) (4Hyp 2-epimerase) (4HypE) (EC 5.1.1.8) (Trans-L-3-hydroxyproline dehydratase)	0.673805	0	0.600075
A9CH05	Atu4693	Porin	DSM only	0	0.363188
A9CH08	Atu4702	Transcriptional regulator, GntR family	DRM only	0	0.877012
A9CH09	Atu4705	Transcriptional regulator, LysR family	DRM only	0	0.22556
A9CH12	Atu4713	Uncharacterized protein	DRM only	0	0.208868
A9CH15	dppA Atu4719	ABC transporter, substrate binding protein (Dipeptide)	0.162596	0	0.126537
A9CH17	Atu4727	Uncharacterized protein	DRM only	0	0.282178
A9CH18	exsA Atu4728	ABC transporter, nucleotide binding/ATPase protein	DRM only	0	0.26957
A9CH21	Atu4732	Fimbrial chaperone	0.522436	0	0.402015
A9CH25	Atu4744	ABC transporter, substrate binding protein (Sugar)	DSM only	0	0.423443
A9CH28	dpe Atu4750	D-psicose 3-epimerase (DPEase) (EC 5.1.3.30)	DSM only	0	0.201189
A9CH29	Atu4752	ABC transporter, nucleotide binding/ATPase protein (Amino acid)	DRM only	0	0.212414
A9CH31	Atu4754	ABC transporter, membrane spanning protein (Amino acid)	DRM only	0	0.42265
A9CH32	Atu4755	ABC transporter, substrate binding protein (Amino acid)	DRM only	0	0.42265
A9CH39	phrB Atu4765	(6-4) photolyase (EC 4.1.99.13) ((6-4)DNA photolyase) (DNA photolyase PhrB) (Photoreactivating enzyme PhrB)	DRM only	0	0.784391
A9CH41	Atu4768	Uncharacterized protein	DRM only	0	0.42265
A9CH45	nodW Atu4774	Two component response regulator	DRM only	0	0.98477
A9CH47	fdhF Atu4776	Formate dehydrogenase alpha subunit	DRM only	0	0.42265
A9CH52	bme11 Atu4793	Exopolysaccharide production protein	1.28513	0	0.749086
A9CH53	bme12 Atu4794	Polysaccharide biosynthesis protein	1.24038	0	0.77515
A9CH66	fabG Atu4821	3-oxoacyl-(Acyl-carrier protein) reductase	DRM only	0	0.118689
A9CH68	acaB Atu4823	Acetyl CoA synthase	DRM only	0	0.235654
A9CH72	Atu4834	6-phosphogluconate dehydrogenase	DSM only	0	0.137078
A9CH73	zwf Atu4835	Glucose-6-phosphate 1-dehydrogenase (G6PD) (EC 1.1.1.49)	0.743175	0	0.751686
A9CH76	Atu4838	Outer membrane lipoprotein Blc	DSM only	0	0.0622897
A9CH79	rbsC Atu4844	ABC transporter, membrane spanning protein (Sugar)	DRM only	0	0.208868
A9CH86	traG Atu4858	Agrobacterium virulence virD4-like protein	DRM only	1	0.0152256
A9CH88	istB Atu4861	IS21 family transposase	DSM only	0	0.405182
A9CH93	Atu4868	Putative oxidoreductase	DRM only	0	0.871489
A9CH96	Atu4872	Transcriptional regulator, LysR family	0.411041	0	0.505903
A9CH99	Atu4875	SnoaL-like domain-containing protein	DSM only	0	0.339367
A9CHA0	Atu4876	Putative oxidoreductase	DSM only	1	0.0231524
A9CHA9	Atu4896	Acetyltransferase	DRM only	0	0.183504
A9CHB0	Atu4897	Uncharacterized protein	DSM only	0	0.183678
A9CHB1	rho Atu2833	Transcription termination factor Rho (EC 3.6.4.-) (ATP-dependent helicase Rho)	0.441005	1	0.0323486
A9CHB2	mnmE trmE Atu2832 AGR_C_5135	tRNA modification GTPase MnmE (EC 3.6.-.-)	DRM only	0	0.361793
A9CHB4	Atu2824	Uncharacterized protein	2.66367	0	0.111445
A9CHB8	uxaB Atu2813	Altronate oxidoreductase	1.69923	0	0.32419
A9CHC1	cobW Atu2805	Cobalamin synthesis protein	1.31699	0	0.393075
A9CHC2	cobN Atu2804	Cobaltochelatase subunit	0.690089	0	0.710769
A9CHC3	cbiC Atu2802	Precorrin-8X methylmutase	DRM only	0	0.219194
A9CHC4	cobI Atu2801	Precorrin-2 C20 methyltransferase	DRM only	0	0.0766727
A9CHC7	cobM Atu2796	Precorrin-4 C11-methyltransferase	DRM only	0	0.102962
A9CHC9	Atu2789	Uncharacterized protein	DRM only	0	0.135449
A9CHD2	Atu2773	Uncharacterized protein	DRM only	1	0.0266928
A9CHD3	phbA Atu2769	Acetyl-CoA acetyltransferase poly-beta-hydroxybutyrate biosynthesis	0.389415	0	0.26033
A9CHD4	Atu2767	Uncharacterized protein	DRM only	1	0.0167875
A9CHD5	gdh Atu2766	Glutamate dehydrogenase (EC 1.4.1.2)	3.96619	0	0.198794
A9CHD6	Atu2765	Transcriptional regulator, CarD family	DSM only	1	0.0186868
A9CHD7	mtrA Atu2763	Two component response regulator	0.117683	0	0.206569
A9CHD8	Atu2762	Cyclic nucleotide-binding domain-containing protein	DRM only	0	0.541886
A9CHD9	Atu2761	Exodeoxyribonuclease III (EC 3.1.11.2)	DRM only	0	0.265946
A9CHE0	Atu2760	Uncharacterized protein	1.0437	0	0.892446
A9CHE3	Atu2755	Putative 2-octaprenyl-6-methoxyphenol	2.15852	0	0.0760321
A9CHE4	mgpS Atu2753	ATP-dependent helicase	0.280807	1	0.00470325
A9CHE5	Atu2752	S4 RNA-binding domain-containing protein	DSM only	0	0.12963
A9CHE7	Atu2750	DNA_pol3_delta domain-containing protein	DRM only	1	0.00487074
A9CHE8	Atu2749	Uncharacterized protein	6.82299	0	0.0883807
A9CHF0	Atu2744	C4-dicarboxylate binding protein	1.11379	0	0.676687
A9CHF4	Atu2739	Oxidoreductase	DSM only	0	0.196334
A9CHF8	ilvA Atu2735	Threonine dehydratase	2.62818	0	0.300352
A9CHG0	hipO Atu2732	Hippurate hydrolase	DRM only	0	0.209002
A9CHG1	pycA Atu2726	Pyruvate carboxylase (EC 6.4.1.1)	2.16581	0	0.617337
A9CHG3	Atu2724	MFS permease	DRM only	0	0.0630978
A9CHG4	ompA Atu2722	Porin	9.17054	0	0.17891
A9CHG5	Atu2719	Aldose 1-epimerase (EC 5.1.3.3)	DRM only	0	0.147856
A9CHG6	uup Atu2716	ATP-binding protein Uup (EC 3.6.1.-)	2.70059	0	0.0999975
A9CHG8	thiP Atu2713	ABC transporter, membrane spanning protein (Thiamine)	DRM only	0	0.269869
A9CHH2	ftsY Atu2693	Signal recognition particle receptor FtsY (SRP receptor)	0.485797	0	0.228051
A9CHH3	ccmG Atu2690	Thiol:disulfide interchange protein	DRM only	1	0.0424677
A9CHH4	ccmC Atu2688	Heme exporter protein C (Cytochrome c-type biogenesis protein)	DRM only	1	0.0334975
A9CHH6	acnA Atu2685	Aconitate hydratase (Aconitase) (EC 4.2.1.3)	0.510071	0	0.143867
A9CHH7	Atu2684	Uncharacterized protein	DRM only	0	0.242982
A9CHH9	Atu2682	Uncharacterized protein	DRM only	1	0.0101892
A9CHI0	Atu2681	Uncharacterized protein	11.7471	1	0.0205377
A9CHI1	Atu2680	ABC transporter, nucleotide binding/ATPase protein	2.00545	0	0.117319
A9CHI3	Atu2670	ABC transporter, nucleotide binding/ATPase protein	2.8477	0	0.0687464
A9CHI8	typA bipA Atu2663	50S ribosomal subunit assembly factor BipA (EC 3.6.5.-) (GTP-binding protein BipA)	3.03761	0	0.116425
A9CHJ0	guaA Atu2658	GMP synthase-glutamine amidotransferase protein	5.77656	1	0.0372839
A9CHJ7	sdhD Atu2644	Succinate dehydrogenase hydrophobic membrane anchor subunit	DRM only	1	0.0363141
A9CHJ8	sdhA Atu2643	Succinate dehydrogenase flavoprotein subunit (EC 1.3.5.1)	0.734561	0	0.358803
A9CHJ9	sdhB Atu2642	Succinate dehydrogenase iron-sulfur subunit (EC 1.3.5.1)	0.723425	1	0.0199088
A9CHK0	sucD Atu2637	Succinate--CoA ligase [ADP-forming] subunit alpha (EC 6.2.1.5) (Succinyl-CoA synthetase subunit alpha) (SCS-alpha)	1.16212	0	0.678054
A9CHK1	sucA Atu2636	Alpha-ketoglutarate dehydrogenase (EC 1.2.4.2)	0.18802	1	0.0278955
A9CHK2	sucB Atu2635	Dihydrolipoyllysine-residue succinyltransferase component of 2-oxoglutarate dehydrogenase complex (EC 2.3.1.61) (2-oxoglutarate dehydrogenase complex component E2)	0.263968	1	0.0284687
A9CHK4	lpdA Atu2632	Dihydrolipoyl dehydrogenase (EC 1.8.1.4)	0.156401	1	0.0359841
A9CHK6	Atu2614	Gly-zipper_Omp domain-containing protein	76.8668	0	0.165953
A9CHK7	Atu2610	FAD-dependent monooxygenase	3.48278	1	0.0254318
A9CHL0	glmS Atu2607	Glucosamine--fructose-6-phosphate aminotransferase	DRM only	0	0.42265
A9CHL4	malE Atu2601	ABC transporter, substrate binding protein (Maltose)	2.26129	1	0.00751523
A9CHL5	malK Atu2600	ABC transporter, nucleotide binding/ATPase protein (Maltose/maltodextrin)	1.28222	0	0.443414
A9CHL7	Atu2596	Beta-N-acetylhexosaminidase (EC 3.2.1.52) (N-acetyl-beta-glucosaminidase)	1.13059	0	0.878047
A9CHL8	Atu2595	Microcystinase C (MlrC)	DSM only	0	0.188392
A9CHM0	Atu2589	ABC transporter, membrane spanning protein (Oligopeptide)	DRM only	0	0.22556
A9CHM1	Atu2586	ABC transporter, nucleotide binding/ATPase protein (Oligopeptide)	3.08886	0	0.0945244
A9CHM3	cyaA Atu2580	Adenylate cyclase	1.1491	0	0.893764
A9CHM5	Atu2577	ABC transporter, nucleotide binding/ATPase protein	11.079	1	0.0135718
A9CHM6	Atu2576	Hydrolase_4 domain-containing protein	2.74587	0	0.101642
A9CHM8	acd Atu2572	Acyl-CoA dehydrogenase	2.80896	0	0.0601395
A9CHN6	Atu2551	Efflux pump membrane transporter	13.1845	1	0.0406086
A9CHN7	stcD Atu2538	N-methylproline demethylase	DRM only	0	0.213858
A9CHP6	Atu2524	Uncharacterized protein	0.515263	0	0.380262
A9CHP8	lpiA Atu2521	Lysylphosphatidylglycerol synthase (EC 2.3.2.3)	DRM only	1	0.00261525
A9CHP9	dppA Atu2518	ABC transporter, substrate binding protein (Dipeptide)	DRM only	0	0.146834
A9CHQ2	dppD Atu2515	ABC transporter, nucleotide binding/ATPase protein (Dipeptide)	0.0786489	0	0.0537264
A9CHQ7	Atu2509	Sugar kinase	0.0172512	0	0.0648687
A9CHQ8	Atu2508	ABC transporter, nucleotide binding/ATPase protein (Sugar)	DRM only	0	0.247195
A9CHR1	Atu2505	ABC transporter, substrate binding protein (Sugar)	1.7386	0	0.215688
A9CHR4	pntB Atu2494	NAD(P) transhydrogenase subunit beta (EC 7.1.1.1) (Nicotinamide nucleotide transhydrogenase subunit beta)	44.2285	1	0.0422463
A9CHR5	pntA Atu2493	NAD(P) transhydrogenase subunit alpha (EC 7.1.1.1)	20.7536	0	0.0562124
A9CHR6	Atu2489	SLT_2 domain-containing protein	0.50214	1	0.0424775
A9CHR8	pdxK Atu2487	Pyridoxal kinase (EC 2.7.1.35)	0.416764	0	0.200811
A9CHR9	cls Atu2486	Choline phosphatase (Phospholipase D)	DRM only	0	0.137566
A9CHS0	mexF Atu2483	Efflux pump membrane transporter	DRM only	1	0.0445121
A9CHS1	mexE Atu2482	HlyD family secretion protein	0.772636	0	0.764335
A9CHS8	Atu2471	Uncharacterized protein	DRM only	0	0.0970797
A9CHT0	Atu2469	Uncharacterized protein	0.568219	1	0.00194526
A9CHT1	Atu2465	Sensor protein QseC (EC 2.7.13.3)	DRM only	0	0.0794004
A9CHT2	purU Atu2464	Formyltetrahydrofolate deformylase (EC 3.5.1.10) (Formyl-FH(4) hydrolase)	DSM only	0	0.0747264
A9CHT3	Atu2463	META domain-containing protein	0.229769	1	0.00983711
A9CHU0	Atu2451	SLT domain-containing protein	DRM only	0	0.344599
A9CHU3	Atu2446	Uncharacterized protein	3.10918	0	0.195784
A9CHU4	rpoH Atu2445	RNA polymerase sigma factor RpoH (RNA polymerase sigma-32 factor)	0.302883	0	0.220806
A9CHU6	Atu2442	Uncharacterized protein	DRM only	1	0.0487617
A9CHU7	Atu2440	Uncharacterized protein	6.11893	0	0.115567
A9CHU8	Atu2438	HPTransfase domain-containing protein	1.30887	0	0.659699
A9CHU9	Atu2435	Acetyltranferase	DRM only	0	0.225247
A9CHV4	Atu2426	ABC transporter, membrane spanning protein (Branched chain amino acid)	DRM only	1	0.0332522
A9CHV5	Atu2424	ABC transporter, nucleotide binding/ATPase protein	2.35893	0	0.0735868
A9CHV7	Atu2420	AAA_28 domain-containing protein	DRM only	0	0.161885
A9CHV8	Atu2419	Transcriptional regulator, LuxR family	DSM only	0	0.365528
A9CHW0	Atu2417	Putative gluconate 5-dehydrogenase	0.455555	0	0.214472
A9CHW2	Atu2410	ABC transporter, nucleotide binding/ATPase protein (Urea/amide)	DSM only	0	0.201189
A9CHW8	Atu2393	Acr family transporter	40.0161	0	0.0683636
A9CHX1	Atu2388	ABC transporter, nucleotide binding/ATPase protein (Nitrate)	DRM only	0	0.42265
A9CHX5	exoM Atu2373	UDP-hexose transferase	DRM only	0	0.0661429
A9CHX7	Atu2370	Uncharacterized protein	1.23484	0	0.560293
A9CHX8	nocP1 Atu2366	ABC transporter, nucleotide binding/ATPase protein	6.55326	0	0.0635502
A9CHX9	Atu2365	ABC transporter, substrate binding protein (Amino acid)	0.957123	0	0.952326
A9CHY2	Atu2362	S-methyltransferase	DRM only	0	0.923547
A9CHY6	Atu2354	Transcriptional regulator, MarR family	DRM only	0	0.42265
A9CHY7	Atu2352	Uncharacterized protein	DRM only	0	0.103865
A9CHZ2	Atu2340	TGc domain-containing protein	DRM only	0	0.138709
A9CHZ3	Atu2339	Alpha-E domain-containing protein	9.61199	0	0.119954
A9CHZ4	Atu2338	Uncharacterized protein	1.09225	0	0.835166
A9CHZ5	Atu2336	YkuD domain-containing protein	23.5259	1	0.0312331
A9CHZ6	Atu2335	Uncharacterized protein	DRM only	1	0.010274
A9CHZ8	Atu2333	ATP-dependent RNA helicase	DRM only	0	0.118263
A9CHZ9	Atu2331	Methyltransf_30 domain-containing protein	0.912399	0	0.927478
A9CI00	Atu2329	Uncharacterized protein	DRM only	0	0.42265
A9CI03	Atu2326	Polbeta domain-containing protein	0.156421	0	0.0809225
A9CI08	lldA Atu2318	L-lactate dehydrogenase	0.298277	0	0.296023
A9CI19	Atu2303	Uncharacterized protein	DRM only	0	0.213858
A9CI21	Atu2301	TPR_21 domain-containing protein	6.15095	1	0.0227865
A9CI23	aglA Atu2295	Alpha-glucosidase	0.567994	0	0.52271
A9CI26	trpE(G) Atu2289	Anthranilate synthase (EC 4.1.3.27)	DSM only	0	0.952795
A9CI28	Atu2287	Outer membrane heme receptor	DRM only	0	0.213858
A9CI31	Atu2284	Uncharacterized protein	11.5834	1	0.0453767
A9CI32	Atu2279	ABC transporter, nucleotide binding/ATPase protein (Proline/glycine betaine)	6.40319	1	0.0379461
A9CI33	cyaC Atu2277	Adenylate cyclase protein	DRM only	1	0.0277507
A9CI34	braC Atu2276	ABC transporter, substrate binding protein (Branched chain amino acid)	0.435978	0	0.144791
A9CI37	Atu2272	Uncharacterized protein	6.11502	0	0.175545
A9CI38	Atu2267	Uncharacterized protein	DRM only	0	0.124586
A9CI41	Atu2259	MFS permease	DRM only	1	0.00577808
A9CI42	Atu2257	Uncharacterized protein	DRM only	1	0.00664
A9CI43	moxR Atu2253	MoxR family protein	0.589364	0	0.648855
A9CI45	Atu2251	NTP pyrophosphohydrolase, MutT family	0.295421	0	0.119459
A9CI51	fbcB Atu2238	Cytochrome b	DRM only	0	0.0552311
A9CI52	Atu2235	MaoC-like domain-containing protein	DRM only	0	0.184884
A9CI60	Atu2215	Purine nucleoside phosphorylase	11.3918	1	0.0342229
A9CI63	envZ Atu2207	Histidine kinase (EC 2.7.13.3)	14.1424	0	0.0874196
A9CI64	petP Atu2205	Transcriptional regulator, MarR family	DSM only	0	0.196334
A9CI66	cspA Atu2200	Cold shock protein	0.328218	0	0.279253
A9CI68	Atu2198	Uncharacterized protein	DRM only	0	0.184884
A9CI70	aatA Atu2196	Aminotransferase (EC 2.6.1.-)	1.19163	0	0.522752
A9CI72	Atu2191	Transcriptional regulator, LysR family	DRM only	0	0.42265
A9CI73	Atu2188	Oxidoreductase	2.34832	0	0.206129
A9CI74	Atu2186	Transcriptional regulator, LysR family	0.923167	0	0.841795
A9CI75	lpcC Atu2183	Lipopolysaccharide core biosynthesis mannosyltransferase	DRM only	1	0.00136042
A9CI76	Atu2180	Type-4 uracil-DNA glycosylase (EC 3.2.2.27)	DSM only	0	0.08767
A9CI78	Atu2175	Uncharacterized protein	DRM only	1	0.0248562
A9CI79	Atu2169	Uncharacterized protein	DRM only	0	0.433892
A9CI81	Atu2165	Bacteriophytochrome protein	0.49684	0	0.314206
A9CI83	Atu2163	Uncharacterized protein	0.501665	0	0.0940087
A9CI84	pp26 Atu2162	Periplasmic immunogenic protein	DSM only	1	0.0382088
A9CI86	tphA Atu2154	MFS permease	DRM only	0	0.12718
A9CI89	Atu2150	ABC transporter, nucleotide binding/ATPase protein	2.5288	1	0.0227843
A9CI90	Atu2147	ABC transporter, substrate binding protein	DSM only	0	0.165371
A9CI92	glnA Atu2142	Glutamine synthetase	0.211355	0	0.22127
A9CI93	Atu2139	Aldehyde dehydrogenase	DRM only	0	0.478799
A9CI94	Atu2137	Uncharacterized protein	DSM only	0	0.120338
A9CI96	Atu2133	YkuD domain-containing protein	DRM only	0	0.280746
A9CI98	Atu2129	Uncharacterized protein	DRM only	0	0.237959
A9CI99	Atu2124	Transcriptional regulator, ArsR family	DRM only	0	0.0932215
A9CIA0	mltB Atu2122	Lytic murein transglycosylase	DSM only	0	0.351966
A9CIA1	Atu2120	O-methyltransferase	DSM only	0	0.453435
A9CIA2	Atu2119	Uncharacterized protein	DSM only	0	0.145492
A9CIA4	Atu2113	N-acetylmuramoyl-L-alanine amidase	DRM only	0	0.184884
A9CIA6	pbpB1 Atu2100	Penicillin binding protein 2	1.00828	0	0.991258
A9CIA7	murF Atu2098	UDP-N-acetylmuramoyl-tripeptide--D-alanyl-D-alanine ligase (EC 6.3.2.10) (D-alanyl-D-alanine-adding enzyme)	1.14368	0	0.917779
A9CIA8	ftsW Atu2095	Cell wall polymerase (EC 2.4.1.129) (Peptidoglycan polymerase)	DRM only	0	0.889297
A9CIA9	Atu2090	ABC transporter, membrane spanning protein (Sugar)	DRM only	0	0.0894486
A9CIB0	ftsQ Atu2088	Cell division protein FtsQ	0.977715	0	0.979067
A9CIB1	ftsZ2 ftsZ Atu2086	Cell division protein FtsZ	0.985964	0	0.960793
A9CIB2	recN Atu2083	DNA repair protein RecN (Recombination protein N)	0.939843	0	0.880427
A9CIB3	ligA Atu2082 AGR_C_3775	DNA ligase (EC 6.5.1.2) (Polydeoxyribonucleotide synthase [NAD(+)])	0.569406	0	0.237802
A9CIC0	sco1 Atu2073	Membrane protein	DRM only	1	0.0263745
A9CIC1	Atu2070	Aminopeptidase P	DSM only	0	0.483053
A9CIC6	Atu2054	AcrB/AcrD/AcrF family protein	53.013	1	0.0238661
A9CIC7	Atu2052	Uncharacterized protein	3.66541	0	0.466746
A9CIC9	hflC Atu2044	Protein HflC	8.30134	1	0.0478573
A9CID3	ilvH Atu2035	Acetolactate synthase (EC 2.2.1.6)	1.64075	0	0.376239
A9CID4	Atu2032	Aldo/keto reductase	DSM only	0	0.279474
A9CID5	Atu2031	Uncharacterized protein	DRM only	0	0.0517713
A9CID7	Atu2021	Transcriptional regulator, AraC family	7.0272	0	0.0653122
A9CID8	Atu2020	Transcriptional regulator, TetR family	DSM only	0	0.194231
A9CIE1	Atu2015	Aminotransferase	DRM only	0	0.199471
A9CIE4	Atu2012	ABC transporter, nucleotide binding/ATPase protein	DRM only	0	0.923547
A9CIE8	Atu1999	NAD(P)-bd_dom domain-containing protein	DSM only	0	0.351428
A9CIF1	Atu1985	Two component response regulator	DRM only	0	0.213858
A9CIF4	Atu1979	Cyclopropane-fatty-acyl-phospholipid synthase	2.76522	0	0.504009
A9CIF5	Atu1978	Uncharacterized protein	5.69127	0	0.253478
A9CIF8	nusG Atu1961	Transcription termination/antitermination protein NusG	0.465775	1	0.0144735
A9CIF9	Atu1954	HTH luxR-type domain-containing protein	DRM only	0	0.183504
A9CIG1	rpsN Atu1933 AGR_C_3535	30S ribosomal protein S14	0.52537	1	0.0186867
A9CIG2	Atu1917	Beta-lactamase domain-containing protein	DRM only	1	0.0352488
A9CIG3	Atu1914	Replication-associated recombination protein A	1.89806	0	0.2935
A9CIG6	Atu1907	ABC transporter, nucleotide binding/ATPase protein	1.63601	0	0.26598
A9CIG7	Atu1906	Transport permease protein	DRM only	0	0.089931
A9CIH1	tktB Atu1901	Transketolase	DSM only	0	0.221877
A9CIH4	Atu1893	Uncharacterized protein	DRM only	0	0.0624256
A9CIH5	cobS Atu1891	Adenosylcobinamide-GDP ribazoletransferase (EC 2.7.8.26) (Cobalamin synthase) (Cobalamin-5'-phosphate synthase)	DRM only	0	0.0538117
A9CIH6	dgk Atu1889	Diacylglycerol kinase (EC 2.7.1.107)	DRM only	0	0.42265
A9CIH8	Atu1885	Transcriptional regulator, AsnC family	0.377725	0	0.316214
A9CII2	Atu1880	ABC transporter, membrane spanning protein (Amino acid)	DRM only	1	0.0452744
A9CII3	Atu1879	ABC transporter, substrate binding protein (Amino acid)	1.02925	0	0.945174
A9CII4	Atu1877	OmpA family protein	0.253932	0	0.162553
A9CII8	icdA Atu1870	Isocitrate dehydrogenase [NADP] (EC 1.1.1.42)	1.46719	1	0.018005
A9CII9	Atu1862	AAA domain-containing protein	4.72411	0	0.168371
A9CIJ1	Atu1856	Inositol monophosphatase family protein	9.26207	0	0.0559083
A9CIJ3	Atu1852	Uncharacterized protein	DRM only	0	0.184884
A9CIJ4	Atu1849	Uncharacterized protein	DRM only	1	0.00818793
A9CIJ6	Atu1847	Uncharacterized protein	DRM only	0	0.42265
A9CIJ7	Atu1846	Uncharacterized protein	DRM only	1	0.0323492
A9CIJ9	purB Atu1841	Adenylosuccinate lyase (ASL) (EC 4.3.2.2) (Adenylosuccinase)	0.604444	0	0.508224
A9CIK0	Atu1840	Uncharacterized protein	DRM only	0	0.0907916
A9CIK4	Atu1833	ATP-dependent RNA helicase	0.833757	0	0.616146
A9CIK5	Atu1832	Membrane protein associated metalloendopeptidase	DSM only	0	0.813324
A9CIK8	nifS Atu1825	Cysteine desulfurase (EC 2.8.1.7) (Nitrogenase metalloclusters biosynthesis protein NifS)	DRM only	0	0.129367
A9CIK9	sufC Atu1823	ABC transporter, nucleotide binding/ATPase protein	1.59596	0	0.362052
A9CIL1	Atu1816	ABC transporter, nucleotide binding/ATPase protein	3.26015	0	0.183144
A9CIL3	Atu1810	Uncharacterized protein	0.132872	1	0.00318135
A9CIL9	Atu1799	Uncharacterized protein	DRM only	1	0.0230058
A9CIM2	ubiH Atu1794	2-octaprenyl-6-methoxyphenol hydroxylase	1.82367	1	0.0285672
A9CIM4	Atu1792	ABC transporter, nucleotide binding/ATPase protein (Sugar)	8.05112	1	0.0414899
A9CIM6	Atu1790	ABC transporter, membrane spanning protein (Sugar)	DRM only	0	0.0795651
A9CIM7	Atu1785	Acetyltransferase	DSM only	0	0.351352
A9CIM8	Atu1784	Uncharacterized protein	DRM only	1	0.00552067
A9CIN2	mfd Atu1778	Transcription-repair-coupling factor (TRCF) (EC 3.6.4.-)	DSM only	0	0.628809
A9CIN3	Atu1777	Uncharacterized protein	29.8629	0	0.153297
A9CIN4	Atu1775	Polyketide biosynthesis associated protein	DSM only	0	0.14633
A9CIN5	Atu1774	ABC transporter, substrate binding protein (Peptide)	1.01827	0	0.968472
A9CIN7	glnA Atu1770	Glutamine synthetase (EC 6.3.1.2)	0.190813	1	0.0320918
A9CIN8	metF Atu1764	Methylenetetrahydrofolate reductase (EC 1.5.1.20)	DRM only	0	0.183504
A9CIP5	Atu1745	Uncharacterized protein	1.51388	0	0.645794
A9CIQ2	Atu1730	Usp domain-containing protein	2.43858	0	0.105442
A9CIQ3	Atu1725	Uncharacterized protein	DRM only	0	0.186065
A9CIQ4	pcm Atu1721	L-isoaspartyl protein carboxyl methyltransferase (Protein L-isoaspartyl methyltransferase) (Protein-L-isoaspartate O-methyltransferase) (Protein-beta-aspartate methyltransferase)	0.280932	1	0.0327661
A9CIQ5	Atu1720	Uncharacterized protein	DSM only	0	0.339068
A9CIQ8	Atu1714	Exodeoxyribonuclease III (EC 3.1.11.2)	0.119837	0	0.380329
A9CIR3	tatC Atu1704	Sec-independent protein translocase protein TatC	DRM only	1	0.00652526
A9CIR7	kefB Atu1693	Glutathione-regulated potassium-efflux system protein	DRM only	1	0.0137059
A9CIR8	Atu1692	Putative_PNPOx domain-containing protein	DRM only	0	0.410494
A9CIR9	moeA Atu1690	Molybdopterin molybdenumtransferase (EC 2.10.1.1)	DRM only	0	0.213858
A9CIS0	ppiD Atu1686	Parvulin-like PPIase (Peptidyl-prolyl cis-trans isomerase plp) (Rotamase plp)	1.23921	0	0.280923
A9CIS3	ppiB Atu1680	Peptidyl-prolyl cis-trans isomerase (PPIase) (EC 5.2.1.8)	0.682724	0	0.159746
A9CIS4	ppiB Atu1679	Peptidyl-prolyl cis-trans isomerase (PPIase) (EC 5.2.1.8)	0.810701	0	0.519705
A9CIS5	Atu1675	Transcriptional regulator	DRM only	0	0.0766072
A9CIS7	adhC Atu1670	S-(hydroxymethyl)glutathione dehydrogenase (EC 1.1.1.284)	0.419876	0	0.364238
A9CIS8	Atu1663	Amidohydrolase	DRM only	0	0.727396
A9CIS9	sthA Atu1661	Soluble pyridine nucleotide transhydrogenase	DRM only	0	0.191777
A9CIT0	Atu1659	Uncharacterized protein	DRM only	0	0.0766072
A9CIT1	nadE Atu1657	Glutamine-dependent NAD(+) synthetase (EC 6.3.5.1) (NAD(+) synthase [glutamine-hydrolyzing])	DSM only	1	0.0292883
A9CIT3	maeB Atu1652	NADP-dependent malic enzyme	0.285498	0	0.271079
A9CIT5	Atu1649	Metallophos domain-containing protein	DRM only	0	0.0549011
A9CIT7	Atu1645	ABC transporter, substrate binding protein	5.52424	1	0.0300466
A9CIT8	Atu1644	ABC_trans_aux domain-containing protein	57.3297	1	0.0318297
A9CIU3	kefA Atu1633	Potassium efflux system KEFA	1.24599	0	0.577422
A9CIU8	gyrB parE Atu1622	DNA topoisomerase 4 subunit B (EC 5.6.2.2) (Topoisomerase IV subunit B)	2.03156	0	0.135923
A9CIU9	Atu1621	DLH domain-containing protein	DSM only	0	0.251637
A9CIV1	Atu1615	Uncharacterized protein	0.862182	0	0.300919
A9CIV2	gor Atu1611	Glutathione reductase (GRase) (EC 1.8.1.7)	DSM only	0	0.523205
A9CIV3	dhs Atu1610	Phospho-2-dehydro-3-deoxyheptonate aldolase (EC 2.5.1.54)	10.01	0	0.216918
A9CIV5	map Atu1606	Methionine aminopeptidase (MAP) (MetAP) (EC 3.4.11.18) (Peptidase M)	1.51984	0	0.382609
A9CIV9	fabF Atu1597	3-oxoacyl-(Acyl-carrier-protein) synthase II	4.40696	0	0.363032
A9CIW0	fabF Atu1596	3-oxoacyl-(Acyl-carrier-protein) synthase II	5.31729	0	0.080692
A9CIW1	Atu1595	NADPH:quinone reductase	0.46881	1	0.0375066
A9CIW2	msbB Atu1594	Lipid A biosynthesis lauroyl acyltransferase	DRM only	1	0.0322714
A9CIW3	Atu1592	Uncharacterized protein	9.53418	0	0.0821884
A9CIW5	Atu1580	ABC transporter, nucleotide binding/ATPase protein (Amino acid)	1.49319	0	0.0940521
A9CIW6	Atu1579	ABC transporter, membrane spanning protein (Amino acid)	DRM only	1	0.0125696
A9CIW7	Atu1578	ABC transporter, membrane spanning protein (Amino acid)	47.6077	1	0.0457356
A9CIW8	Atu1577	ABC transporter, substrate binding protein (Amino acid)	2.4287	0	0.0720533
A9CIW9	metC Atu1575	Cystathionine beta lyase	DSM only	0	0.400447
A9CIX0	nah Atu1574	Salicylate hydroxylase	6.19983	1	0.00245346
A9CIX2	cyc Atu1569	Cytochrome P450	2.06542	0	0.129365
A9CIX5	yajC Atu1563	Sec translocon accessory complex subunit YajC	14.9983	0	0.0746211
A9CIX7	crtB Atu1560	Phytoene synthase	DRM only	0	0.216277
A9CIY1	Atu1546	Transcriptional regulator, MerR family	DSM only	0	0.18396
A9CIY2	Atu1545	DUF1624 domain-containing protein	DRM only	0	0.199079
A9CIY7	fixO Atu1536	Cytochrome C oxidase, FixO chain	DRM only	0	0.068819
A9CIY9	fixG Atu1530	Nitrogen fixation protein FixG	DRM only	1	0.0107066
A9CIZ1	fixI Atu1528	Nitrogen fixation protein FixI	DRM only	0	0.0818089
A9CIZ2	gntZ Atu1526	6-phosphogluconate dehydrogenase, decarboxylating (EC 1.1.1.44)	0.511898	0	0.426105
A9CIZ3	Atu1525	Uncharacterized protein	1.36568	0	0.757534
A9CIZ7	Atu1509	Uncharacterized protein	DRM only	0	0.0858
A9CJ00	Atu1503	Uncharacterized protein	DRM only	0	0.237794
A9CJ01	rlpA Atu1500	Endolytic peptidoglycan transglycosylase RlpA (EC 4.2.2.-)	DRM only	1	0.030295
A9CJ03	clc Atu1493	Chloride channel protein	DRM only	0	0.42265
A9CJ09	Atu1480	Alkyl hydroperoxide reductase C (Peroxiredoxin) (Thioredoxin peroxidase)	0.566494	1	0.0119659
A9CJ14	Atu1473	Uncharacterized protein	DRM only	1	0.039639
A9CJ17	Atu1468	DUF1775 domain-containing protein	0.41307	0	0.152116
A9CJ19	Atu1460	Uncharacterized protein	DRM only	0	0.737783
A9CJ21	cysI Atu1456	Sulfite reductase (NADPH) hemoprotein beta-component	6.57751	0	0.104213
A9CJ22	trkA Atu1449	Trk system potassium uptake protein TrkA	DRM only	0	0.297764
A9CJ23	ntrX Atu1448	Two component response regulator	2.06354	0	0.0795281
A9CJ24	ntrB Atu1445	Histidine kinase (EC 2.7.13.3)	3.21403	0	0.167453
A9CJ28	Atu1440	Uncharacterized protein	DRM only	0	0.191777
A9CJ30	lpdA Atu1434	Dihydrolipoyl dehydrogenase (EC 1.8.1.4)	0.380965	1	0.0296124
A9CJ32	pdhB Atu1430	Pyruvate dehydrogenase E1 component subunit beta (EC 1.2.4.1)	0.710709	1	0.0372208
A9CJ35	gcvT Atu1420	Glycine cleavage system T protein, aminomethyltransferase	DRM only	0	0.286095
A9CJ36	Atu1419	Transcriptional regulator, GntR family	DSM only	0	0.400378
A9CJ39	Atu1413	ABC transporter, substrate binding protein (Branched chain amino acid)	DRM only	0	0.184884
A9CJ44	Atu1406	Isomerase/lactonizing enzyme	DSM only	0	0.089083
A9CJ48	Atu1401	ABC transporter, nucleotide binding/ATPase protein	DRM only	0	0.905813
A9CJ50	Atu1397	ABC transporter, membrane spanning protein (Amino acid)	DRM only	0	0.237794
A9CJ52	Atu1394	Glutathione S-transferase	DSM only	0	0.196334
A9CJ53	cisY Atu1392	Citrate synthase	0.259254	0	0.0801178
A9CJ58	Atu1387	Transcriptional regulator, GntR family	DRM only	0	0.0766072
A9CJ59	lpxB Atu1386	Lipid-A-disaccharide synthase (EC 2.4.1.182)	2.08832	0	0.263449
A9CJ60	Atu1385	Uncharacterized protein	3.98287	0	0.218294
A9CJ61	omp1 bamA Atu1381	Outer membrane protein assembly factor BamA	11.7911	0	0.0860313
A9CJ64	Atu1370	Uncharacterized protein	DSM only	0	0.29085
A9CJ66	clpA Atu1364	ATP-dependent Clp protease, ATP-binding subunit	0.918284	0	0.543582
A9CJ68	Atu1355	Uncharacterized protein	DSM only	0	0.272884
A9CJ70	Atu1351	Uncharacterized protein	1.3914	0	0.522596
A9CJ72	Atu1348	Uncharacterized protein	0.270469	0	0.222117
A9CJ77	mrcA Atu1341	DD-transpeptidase (EC 2.4.1.129) (EC 3.4.16.4) (Penicillin-binding protein 1A) (Penicillin-insensitive transglycosylase) (Penicillin-sensitive transpeptidase) (Peptidoglycan TGase)	12.2753	1	0.0126228
A9CJ78	fabG Atu1338	3-oxoacyl-(Acyl carrier protein) reductase	DSM only	1	0.0244523
A9CJ83	accC Atu1330	Biotin carboxylase (EC 6.3.4.14) (EC 6.4.1.2)	1.2511	0	0.611443
A9CJ84	Atu1327	NADH-ubiquinone oxidoreductase	2.56881	0	0.082767
A9CJ85	Atu1326	Acetyltransferase	DRM only	0	0.267423
A9CJ88	Atu1317 AGR_C_2426	UPF0173 metal-dependent hydrolase Atu1317	DRM only	0	0.923547
A9CJ89	Atu1311	Acetyltransferase	0.177317	1	0.00689522
A9CJ90	acd Atu1310	Acyl-CoA dehydrogenase	DSM only	0	0.0504199
A9CJ91	pyrC Atu1307	Dihydroorotase	0.216001	0	0.131951
A9CJ92	Atu1305	DNA processing chain A	DRM only	0	0.22556
A9CJ93	topA Atu1304	DNA topoisomerase 1 (EC 5.6.2.1) (DNA topoisomerase I)	0.466556	1	0.0434338
A9CJ94	rnr Atu1303	Ribonuclease R (RNase R) (EC 3.1.13.1)	0.219021	1	0.0280083
A9CJ95	Atu1302	Uncharacterized protein	DRM only	0	0.10819
A9CJ99	dnaE Atu1292	DNA polymerase III subunit alpha (EC 2.7.7.7)	8.98105	0	0.204583
A9CJA0	Atu1289	ABC transporter, membrane spanning protein	19.7952	1	0.0340365
A9CJA2	nuoM Atu1282	NADH dehydrogenase I chain M	25.3444	1	0.0134943
A9CJA3	nuoL Atu1281	NADH:ubiquinone reductase (H(+)-translocating) (EC 7.1.1.2)	DRM only	0	0.0548035
A9CJA4	nuoK Atu1280 AGR_C_2359	NADH-quinone oxidoreductase subunit K (EC 7.1.1.-) (NADH dehydrogenase I subunit K) (NDH-1 subunit K)	DRM only	1	0.0208402
A9CJA5	nuoJ Atu1279	NADH-quinone oxidoreductase subunit J (EC 7.1.1.-)	DRM only	1	0.0208518
A9CJA6	nuoF Atu1275	NADH-quinone oxidoreductase subunit F (EC 7.1.1.-)	0.538672	1	0.00912933
A9CJA7	nuoE Atu1274	NADH ubiquinone oxidoreductase chain E	0.312346	1	0.0345773
A9CJA9	nuoD Atu1272 AGR_C_2346	NADH-quinone oxidoreductase subunit D (EC 7.1.1.-) (NADH dehydrogenase I subunit D) (NDH-1 subunit D)	1.76643	0	0.122649
A9CJB1	nuoC Atu1270 AGR_C_2342	NADH-quinone oxidoreductase subunit C (EC 7.1.1.-) (NADH dehydrogenase I subunit C) (NDH-1 subunit C)	1.20619	0	0.511302
A9CJB2	nuoB Atu1269 AGR_C_2341	NADH-quinone oxidoreductase subunit B (EC 7.1.1.-) (NADH dehydrogenase I subunit B) (NDH-1 subunit B)	0.907856	0	0.604011
A9CJB4	hupA Atu1262	Histone-like protein	0.295034	1	0.0093919
A9CJB5	lon Atu1261	Lon protease (EC 3.4.21.53) (ATP-dependent protease La)	0.956482	0	0.777302
A9CJB9	cysD Atu1251	O-acetylhomoserine sulfhydrylase	DSM only	0	0.243684
A9CJC0	Atu1250	CoA_binding domain-containing protein	0.977888	0	0.982265
A9CJC2	speB Atu1245	Agmatinase	0.247946	0	0.321251
A9CJC3	strB Atu1243	Streptomycin resistance protein	DRM only	0	0.22556
A9CJC4	exoP Atu1239	Exopolysaccharide production protein	9.65262	1	0.00856769
A9CJC5	gumB Atu1238	Polysaccharide export protein	DRM only	1	0.0257968
A9CJC7	Atu1222	Uncharacterized protein	0.129423	0	0.0958413
A9CJC9	phrA Atu1218	Deoxyribodipyrimidine photo-lyase (EC 4.1.99.3) (Cyclobutane pyrimidine dimer photolyase) (CPD photolyase) (DNA photolyase PhrA) (Photoreactivating enzyme PhrA)	DRM only	0	0.50353
A9CJD0	cysK Atu1217	Cysteine synthase	0.916358	0	0.889268
A9CJD2	Atu1215	Thiosulfate sulfurtransferase	1.07229	0	0.916999
A9CJD4	cpdB Atu1210	2',3'-cyclic-nucleotide 2'-phosphodiesterase/3'-nucleotidase (EC 3.1.3.6) (EC 3.1.4.16)	8.70068	0	0.21262
A9CJD5	Atu1209	Transcriptional regulator, LysR family	DSM only	0	0.311736
A9CJD7	Atu1201	ABC transporter, nucleotide binding/ATPase protein	DRM only	0	0.0797155
A9CJE3	Atu1195	Heavy-metal transporting P-type ATPase	DRM only	0	0.18007
A9CJF0	Atu1164	Uncharacterized protein	8.04253	0	0.0844008
A9CJF2	Atu1160	RDD domain-containing protein	DRM only	1	0.0386676
A9CJF3	parC Atu1158	DNA topoisomerase 4 subunit A (EC 5.6.2.2) (Topoisomerase IV subunit A)	1.3769	0	0.567786
A9CJF4	Atu1157	Uncharacterized protein	0.370453	1	0.0159317
A9CJF6	Atu1152	MFS permease	DRM only	0	0.0576706
A9CJF8	Atu1146	Acetyl transferase	DSM only	0	0.201189
A9CJF9	ppx Atu1145	Exopolyphosphatase (EC 3.6.1.11)	0.205116	1	0.0124336
A9CJG3	Atu1134	Uncharacterized protein	DRM only	0	0.119161
A9CJG4	Atu1132	Glutathione S-transferase related protein	DSM only	1	0.00443856
A9CJG5	pgsA Atu1128	Phosphatidylglycerophosphate synthase	DRM only	1	0.00398801
A9CJG7	ligE Atu1121	Lignin degradation protein	DRM only	0	0.463582
A9CJG9	nwsB Atu1116	Two component response regulator	0.859683	0	0.805706
A9CJH0	Atu1108	Uncharacterized protein	DRM only	0	0.105789
A9CJH1	Atu1107	Uncharacterized protein	DRM only	1	0.0331765
A9CJH2	ostA lptD Atu1106	LPS-assembly protein LptD	37.0727	1	0.0390899
A9CJH3	Atu1105	Uncharacterized protein	0.313349	1	0.0136534
A9CJH6	Atu1098	Uncharacterized protein	DSM only	0	0.201189
A9CJH7	fabG Atu1095	3-oxoacyl-[acyl-carrier-protein] reductase (EC 1.1.1.100)	0.2125	1	0.0231501
A9CJH8	fabD Atu1094	Malonyl CoA-acyl carrier protein transacylase (EC 2.3.1.39)	DSM only	0	0.666058
A9CJH9	Atu1089	Uncharacterized protein	DRM only	0	0.113044
A9CJI0	dnaC Atu1084	Replicative DNA helicase (EC 3.6.4.12)	1.43494	0	0.586858
A9CJI4	radA Atu1077	DNA repair protein RadA	4.01495	1	0.017944
A9CJI5	purF Atu1075	Amidophosphoribosyltransferase (ATase) (EC 2.4.2.14) (Glutamine phosphoribosylpyrophosphate amidotransferase) (GPATase)	0.600857	0	0.568216
A9CJJ5	Atu1050	Uncharacterized protein	DRM only	1	0.0287427
A9CJJ6	Atu1049	ZinT domain-containing protein	0.285223	1	0.0452976
A9CJK0	Atu1045	Uncharacterized protein	1.30479	0	0.605372
A9CJK1	Atu1044	Uncharacterized protein	DRM only	0	0.192473
A9CJK2	Atu1043	HD domain-containing protein	DSM only	0	0.196334
A9CJK6	sipf Atu1034	Signal peptidase I (EC 3.4.21.89)	6.33106	1	0.0197157
A9CJK8	mcpV Atu1027	Methyl-accepting chemotaxis protein	DRM only	0	0.42265
A9CJK9	Atu1021	Porin	23.1642	0	0.280259
A9CJL0	Atu1020	Porin	7.71003	0	0.157371
A9CJL4	Atu1001	DAGKc domain-containing protein	6.17513	0	0.0566053
A9CJL5	mgtE Atu0999	Magnesium transporter MgtE	DRM only	0	0.135288
A9CJL7	Atu0996	Zinc-type alcohol dehydrogenase-like protein	DRM only	0	0.737783
A9CJL8	Atu0994	Electron transfer flavoprotein-ubiquinone oxidoreductase (ETF-QO) (EC 1.5.5.1)	7.71337	1	0.00790006
A9CJM2	Atu0987	Type-4 uracil-DNA glycosylase (EC 3.2.2.27)	DRM only	0	0.176785
A9CJM4	pepN Atu0984	Aminopeptidase N (EC 3.4.11.2)	2.61021	0	0.152892
A9CJM5	Atu0982	Histidine kinase (EC 2.7.13.3)	DRM only	0	0.184884
A9CJM6	ragB Atu0979	Histidine kinase (EC 2.7.13.3)	3.73533	1	0.00931411
A9CJM7	ragA Atu0978	Two component response regulator	0.983821	0	0.972071
A9CJM8	dop Atu0977	Periplasmic serine endoprotease DegP-like (EC 3.4.21.107)	0.459968	1	0.0124939
A9CJN0	cycH Atu0973	CycH protein	DRM only	1	0.030963
A9CJN1	Atu0971	Histidine kinase (EC 2.7.13.3)	5.26049	1	0.0104609
A9CJN3	Atu0967	Uncharacterized protein	0.417917	0	0.42414
A9CJP2	Atu0950	Uncharacterized protein	DRM only	0	0.179717
A9CJP7	Atu0937	Copper transporting ATPase	7.6546	1	0.0150726
A9CJP9	Atu0931	Penicillin-insensitive transglycosylase (EC 2.4.1.129) (Peptidoglycan TGase)	DRM only	0	0.244711
A9CJQ2	Atu0926	DUF1214 domain-containing protein	DRM only	0	0.0647223
A9CJQ7	ros Atu0916	Transcriptional regulator	1.16906	0	0.613384
A9CJQ9	mnhF Atu0914	Na+/H+ antiporter	DRM only	0	0.42265
A9CJR6	Atu0904	Universal stress protein	0.898482	0	0.87503
A9CJS3	Atu0892	Uncharacterized protein	DRM only	0	0.184884
A9CJS8	Atu0882	Uncharacterized protein	DRM only	0	0.124451
A9CJT6	Atu0860	DUF853 domain-containing protein	1.22634	0	0.395197
A9CJU3	Atu0841	Peptidase_S9 domain-containing protein	3.33157	0	0.308312
A9CJU4	gst Atu0836	Glutathione-S-transferase	DRM only	0	0.300009
A9CJU5	gst Atu0835	Glutathione S-transferase	2.03157	0	0.419046
A9CJV0	Atu0820	ABC transporter, substrate binding protein (Sulfate)	DRM only	0	0.288058
A9CJV2	Atu0813	Uncharacterized protein	DRM only	1	0.0378185
A9CJV4	Atu0806	Uncharacterized protein	DRM only	0	0.199269
A9CJV6	Atu0800	Thioredoxin domain-containing protein	0.37175	0	0.135237
A9CJV7	mutY Atu0798	Adenine DNA glycosylase (EC 3.2.2.31)	19.1094	0	0.155697
A9CJV8	Atu0797	Hydrolase	DRM only	0	0.194709
A9CJW0	ccrM Atu0794	Methyltransferase (EC 2.1.1.-)	DRM only	0	0.256824
A9CJW4	Atu0788	Uncharacterized protein	9.2116	1	0.028639
A9CJW5	thrC Atu0787	Threonine synthase (EC 4.2.3.1)	0.30144	1	0.0398758
A9CJW6	rimJ Atu0785	Ribosomal-protein (S5)-alanine N-acetyltransferase	DSM only	0	0.623911
A9CJW7	Atu0784	Uncharacterized protein	DRM only	1	0.026239
A9CJW9	Atu0779	Glutathione-dependent peroxiredoxin (EC 1.11.1.27)	0.620577	0	0.600708
A9CJX1	surf1 Atu0773	SURF1-like protein	DRM only	0	0.0593678
A9CJX2	coxC Atu0771	Cytochrome aa3 subunit 3 (EC 7.1.1.9) (Cytochrome c oxidase polypeptide III)	DRM only	1	0.0280497
A9CJX4	ialB Atu0766	Invasion associated locus B	0.45286	0	0.0962715
A9CJX8	Atu0759	17kDa_Anti_2 domain-containing protein	1.10132	0	0.906218
A9CJX9	fabI Atu0757	Enoyl-[acyl-carrier-protein] reductase [NADH] (EC 1.3.1.9)	1.77406	0	0.300952
A9CJY0	gpmB Atu0756	Phosphoglycerate mutase	DRM only	0	0.628975
A9CJY2	Atu0752	Uncharacterized protein	2.69785	0	0.342081
A9CJY4	bioY Atu0749	Biotin transporter	DRM only	1	0.0339329
A9CJY5	Atu0748	Deacetylase	DRM only	0	0.42265
A9CJZ1	Atu0736	Hemolysin	0.871151	0	0.851117
A9CJZ3	Atu0733	Enoyl-CoA hydratase/isomerase	DRM only	0	0.1483
A9CJZ5	Atu0728	Lectin-like protein BA14k	1.41589	0	0.473469
A9CJZ6	Atu0727	Ferredoxin I	DRM only	0	0.176785
A9CK00	Atu0719	Transacetylase	DRM only	0	0.42265
A9CK01	atpF1 Atu0717 AGR_C_1301	ATP synthase subunit b 1 (ATP synthase F(0) sector subunit b 1) (ATPase subunit I 1) (F-type ATPase subunit b 1) (F-ATPase subunit b 1)	3.18727	0	0.122088
A9CK02	atpC atpE Atu0715	ATP synthase subunit c (ATP synthase F(0) sector subunit c) (F-type ATPase subunit c) (F-ATPase subunit c) (Lipid-binding protein)	0.882308	0	0.383041
A9CK03	atpB Atu0714 AGR_C_1295	ATP synthase subunit a (ATP synthase F0 sector subunit a) (F-ATPase subunit 6)	DRM only	0	0.198294
A9CK04	atpI Atu0713	ATP synthase protein I	DRM only	0	0.253666
A9CK05	corA Atu0710	Magnesium/cobalt transport protein	DRM only	0	0.213986
A9CK11	kdtA Atu0695	3-deoxy-D-manno-octulosonic acid transferase (Kdo transferase) (EC 2.4.99.12) (Lipid IV(A) 3-deoxy-D-manno-octulosonic acid transferase)	4.57616	0	0.0850666
A9CK12	Atu0694	Inositol monophosphatase family protein	DRM only	0	0.301791
A9CK14	Atu0690	Uncharacterized protein	3.88028	0	0.195632
A9CK15	rluB Atu0689	Pseudouridine synthase (EC 5.4.99.-)	0.646325	0	0.473305
A9CK23	Atu0673	Uncharacterized protein	DRM only	0	0.165522
A9CK25	glcF Atu0667	Glycolate oxidase iron-sulfur subunit	2.26471	0	0.0700448
A9CK27	Atu0663	Uncharacterized protein	DRM only	0	0.050539
A9CK31	Atu0659	NTP pyrophosphohydrolase, MutT family	0.392932	0	0.209379
A9CK32	pit Atu0658	Phosphate transporter	DRM only	0	0.213858
A9CK36	ubiA Atu0651	4-hydroxybenzoate octaprenyltransferase (EC 2.5.1.39) (4-HB polyprenyltransferase)	DRM only	0	0.365597
A9CK37	Atu0650	Uncharacterized protein	DRM only	1	0.00828852
A9CK38	cfa Atu0649	Cyclopropane-fatty-acyl-phospholipid synthase	0.912808	0	0.580793
A9CK39	glyS Atu0644 AGR_C_1144	Glycine--tRNA ligase beta subunit (EC 6.1.1.14) (Glycyl-tRNA synthetase beta subunit) (GlyRS)	0.490211	0	0.389125
A9CK40	aroA Atu0642	3-phosphoshikimate 1-carboxyvinyltransferase (EC 2.5.1.19) (5-enolpyruvylshikimate-3-phosphate synthase) (EPSP synthase) (EPSPS)	DRM only	1	0.00158371
A9CK41	Atu0641	Uncharacterized protein	2.95809	0	0.0675661
A9CK44	moaB Atu0631	Molybdenum cofactor biosynthesis protein B	DRM only	0	0.249354
A9CK46	Atu0628	Histidine kinase (EC 2.7.13.3)	DSM only	0	0.594134
A9CK47	adhP Atu0626	Alcohol dehydrogenase	6.66565	0	0.211108
A9CK48	Atu0621	MFS permease	DRM only	1	0.0488926
A9CK49	Atu0612	ABC transporter, membrane spanning protein	DRM only	0	0.42265
A9CK50	potG potA Atu0610	Spermidine/putrescine import ATP-binding protein PotA (EC 7.6.2.11)	1.48152	0	0.232019
A9CK51	potF Atu0609	Putrescine-binding periplasmic protein	0.39072	1	0.0319906
A9CK52	Atu0608	Transcriptional regulator	0.106257	0	0.300285
A9CK53	aceA Atu0607	Isocitrase (EC 4.1.3.1) (Isocitratase) (Isocitrate lyase)	DRM only	0	0.213858
A9CK54	Atu0605	Transcriptional regulator, LysR family	DRM only	0	0.676285
A9CK55	ordL Atu0601	Oxidoreductase	14.8383	1	0.0107987
A9CK56	edd Atu0598	Phosphogluconate dehydratase (EC 4.2.1.12)	0.614669	0	0.333579
A9CK57	aglK Atu0595	ABC transporter, nucleotide binding/ATPase protein	1.1828	0	0.389179
A9CK58	aglG Atu0593	ABC transporter, membrane spanning protein	DRM only	0	0.254044
A9CK59	aglE Atu0591	ABC transporter, substrate binding protein (Alpha-glucoside)	3.67853	1	0.02908
A9CK60	Atu0588	Uncharacterized protein	0.947154	0	0.852779
A9CK66	flgL Atu0576	Flagellin	DRM only	0	0.0598094
A9CK67	flgK Atu0575	Flagellar hook-associated protein 1	21.6559	0	0.0613716
A9CK68	flgE Atu0574	Flagellar hook protein FlgE	DSM only	0	0.211445
A9CK70	motD Atu0571	Chemotaxis MotD protein	DSM only	0	0.272348
A9CK74	Atu0527	Histidine kinase (EC 2.7.13.3)	DRM only	0	0.42265
A9CK75	luxR Atu0524	Transcriptional regulator, LuxR family	2.10913	0	0.150163
A9CK76	cheA Atu0517	Histidine kinase (EC 2.7.13.3)	DRM only	0	0.859579
A9CK78	phaC Atu0511	pH adaption potassium efflux system protein	DRM only	0	0.42265
A9CK80	phaG Atu0507	Potassium efflux system protein	DRM only	0	0.362355
A9CK81	fadB Atu0503	3-hydroxyacyl-CoA dehydrogenase (EC 1.1.1.35)	0.175821	0	0.163663
A9CK82	Atu0502	Acetyl-CoA acetyltransferase	0.665078	0	0.446662
A9CK85	pyrD Atu0486 AGR_C_861	Dihydroorotate dehydrogenase (quinone) (EC 1.3.5.2) (DHOdehase) (DHOD) (DHODase) (Dihydroorotate oxidase)	4.8039	0	0.123956
A9CK86	c1 Atu0483	Bacteriophage repressor protein C1	DSM only	1	0.00704015
A9CK87	Atu0482	Chitooligosaccharide deacetylase (Nodulation protein B)	DRM only	0	0.42265
A9CK91	Atu0458	Uncharacterized protein	DRM only	0	0.0660744
A9CK96	Atu0447	Uncharacterized protein	0.234793	0	0.265313
A9CKA0	Atu0436	DNA helicase (EC 3.6.4.12)	DSM only	0	0.0527679
A9CKA4	phoU Atu0424	Phosphate-specific transport system accessory protein PhoU	2.23307	0	0.106221
A9CKA5	pstA Atu0422	Phosphate transport system permease protein PstA	DRM only	0	0.0551515
A9CKA6	pstC Atu0421	Phosphate transport system permease protein	DRM only	1	0.00676313
A9CKA7	Atu0420	ABC transporter, substrate binding protein (Phosphate)	DSM only	0	0.265487
A9CKA8	Atu0418	Polyphosphate:ADP phosphotransferase (EC 2.7.4.1) (Polyphosphate kinase PPK2)	DRM only	1	0.00697155
A9CKB1	fbpA Atu0407	ABC transporter, substrate binding protein (Iron)	DRM only	0	0.327087
A9CKB2	fadD Atu0405	Long-chain-fatty-acid-CoA-ligase	0.31267	1	0.0256436
A9CKB4	Atu0398	4-hydroxyproline 2-epimerase (4Hyp 2-epimerase) (4HypE) (EC 5.1.1.8)	DSM only	0	0.732677
A9CKB6	Atu0394	ABC transporter, substrate binding protein (Sugar)	2.08706	0	0.552391
A9CKB9	Atu0388	Histidine kinase (EC 2.7.13.3)	8.31823	0	0.101679
A9CKC3	hspC Atu0375	Small heat shock protein	0.425965	1	0.0461152
A9CKC4	dapE Atu0370 AGR_C_647	Succinyl-diaminopimelate desuccinylase (SDAP desuccinylase) (EC 3.5.1.18) (N-succinyl-LL-2,6-diaminoheptanedioate amidohydrolase)	DSM only	0	0.18396
A9CKC8	metK Atu0362	Methionine adenosyltransferase (EC 2.5.1.6)	1.19797	0	0.257094
A9CKC9	plsC Atu0355	1-acyl-sn-glycerol-3-phosphate acyltransferase	DRM only	0	0.146254
A9CKD3	Atu0351	Nfu_N domain-containing protein	0.715468	0	0.481793
A9CKD6	Atu0340	SAM dependent methyltransferase	0.60162	0	0.324098
A9CKD7	Atu0339	Uncharacterized protein	4.42146	0	0.153967
A9CKD8	sppA Atu0337	Proteinase IV	DRM only	1	0.0380295
A9CKD9	Atu0333	Lipopolysaccharide export system ATP-binding protein LptB	2.32792	1	0.013362
A9CKE0	ptsN Atu0330	Nitrogen regulatory IIA protein	DSM only	0	0.0715072
A9CKE1	aarF Atu0319	Ubiquinone biosynthesis protein	8.73686	1	0.0210965
A9CKE4	cysK Atu0312	Cysteine synthase (EC 2.5.1.47)	0.496939	0	0.246593
A9CKE9	Atu0300	Methyltransferase	5.33974	0	0.193343
A9CKF2	Atu0293	Glutathione S-transferase	DSM only	0	0.0656899
A9CKF6	sun Atu0289	Sun protein	0.417292	0	0.109343
A9CKF8	Atu0286	Peptidase_M75 domain-containing protein	DSM only	0	0.18396
A9CKG1	Atu0283	4HBT domain-containing protein	DRM only	0	0.326241
A9CKG3	Atu0280	Uncharacterized protein	DRM only	0	0.184884
A9CKG4	Atu0279	Transcriptional regulator, TetR family	0.383043	0	0.405182
A9CKG8	ampS Atu0274	Aminopeptidase	DSM only	0	0.110714
A9CKH4	Atu0263	Oxidoreductase	1.48492	0	0.65267
A9CKH5	Atu0262	Acetyltransferase	DRM only	1	0.0320258
A9CKH7	infC Atu0254	Translation initiation factor 3	0.26214	1	0.0224796
A9CKH9	Atu0251	Rubrerythrin domain-containing protein	7.04651	0	0.0990348
A9CKI0	Atu0249	ABC transporter, substrate binding protein (Sugar)	0.489254	0	0.364386
A9CKI1	Atu0248	Transcriptional regulator, AraC family	DRM only	0	0.384887
A9CKI2	Atu0247	AB hydrolase-1 domain-containing protein	DRM only	0	0.208868
A9CKI9	Atu0236	Uncharacterized protein	DRM only	0	0.0957025
A9CKJ4	ctpC Atu0222	Components of type IV pilus	DRM only	0	0.42265
A9CKJ5	ctpD Atu0221	Component of type IV pilus	DRM only	0	0.194819
A9CKJ6	ctpE Atu0220	Components of type IV pilus	DRM only	0	0.0686899
A9CKJ7	ctpH Atu0217	Components of type IV pilus	DRM only	0	0.505538
A9CKJ9	Atu0215	TPR_REGION domain-containing protein	DRM only	0	0.282451
A9CKK0	Atu0214	Leucine aminopeptidase	0.676479	0	0.532257
A9CKK1	Atu0211	Uncharacterized protein	DSM only	0	0.190419
A9CKK3	Atu0207	Transcriptional regulator, LysR family	DRM only	0	0.256824
A9CKK4	mmsA Atu0205	Methylmalonate-semialdehyde dehydrogenase	0.132273	1	0.0459457
A9CKK6	aau3 Atu0201	Uncharacterized protein	3.25797	0	0.108693
A9CKK7	Atu0199	ABC transporter, substrate binding protein (Proline/glycine/betaine)	DRM only	1	0.0480052
A9CKK8	Atu0198	ABC transporter, membrane spanning protein (Proline/glycine/betaine)	DRM only	0	0.31011
A9CKK9	Atu0197	ABC transporter, nucleotide binding/ATPase protein (Proline/glycine/betaine)	13.0322	1	0.03561
A9CKL1	ordL Atu0194	Oxidoreductase	13.1715	0	0.0646131
A9CKL2	Atu0190	ABC transporter, nucleotide binding/ATPase protein (Peptide)	2.67698	1	0.0150495
A9CKL3	Atu0188	ABC transporter, membrane spanning protein (Peptide)	DRM only	0	0.159222
A9CKL4	Atu0187	ABC transporter, substrate binding protein (Peptide)	1.55271	0	0.0757875
A9CKL5	mepA Atu0186	Penicillin-insensitive murein endopeptidase	0.691404	0	0.503254
A9CKL6	Atu0182	Transcriptional regulator, GntR family	DRM only	0	0.42265
A9CKM4	phnM Atu0169	Amidohydro-rel domain-containing protein	2.21389	0	0.0785591
A9CKM5	phnN gmk Atu0168 AGR_C_277	Ribose 1,5-bisphosphate phosphokinase PhnN (EC 2.7.4.23) (Ribose 1,5-bisphosphokinase)	DRM only	0	0.162932
A9CKM6	Atu0167	Transcriptional regulator, AraC family	DRM only	0	0.188663
A9CKM7	Atu0164	Putative malate dehydrogenase	DRM only	0	0.279453
A9CKN0	hutC Atu0160	Transcriptional regulator, GntR family	DSM only	0	0.18396
A9CKN4	cyoB Atu0141	Cytochrome O ubiquinol oxidase subunit I	1.43872	0	0.0700033
A9CKN5	cyoC Atu0140	Cytochrome bo(3) ubiquinol oxidase subunit 3 (Cytochrome o ubiquinol oxidase subunit 3) (Oxidase bo(3) subunit 3) (Ubiquinol oxidase polypeptide III) (Ubiquinol oxidase subunit 3)	DRM only	0	0.0914568
A9CKN7	Atu0129	ABC transporter, membrane spanning protein (Sugar/ribonucleotide)	DRM only	0	0.102932
A9CKN8	Atu0128	ABC transporter, membrane spanning protein (Sugar/ribonucleotide)	DRM only	1	0.00727376
A9CKN9	Atu0126	Membrane lipoprotein	2.56618	1	0.0348158
A9CKP5	polA Atu0110	DNA polymerase I (EC 2.7.7.7)	2.22796	0	0.315996
A9CKP7	pbpC Atu0103	Penicillin-insensitive transglycosylase (EC 2.4.1.129) (Peptidoglycan TGase)	DRM only	0	0.125304
A9CKP8	kdsB Atu0100 AGR_C_152	3-deoxy-manno-octulosonate cytidylyltransferase (EC 2.7.7.38) (CMP-2-keto-3-deoxyoctulosonic acid synthase) (CKS) (CMP-KDO synthase)	0.394402	0	0.242913
A9CKQ1	dnaX Atu0096	DNA polymerase III subunit gamma/tau (EC 2.7.7.7)	2.68814	0	0.0754152
A9CKQ3	mltB Atu0092	Lytic murein transglycosylase	0.199184	0	0.244913
A9CKQ5	nusA Atu0089	Transcription termination/antitermination protein NusA	0.709471	0	0.254984
A9CKQ6	Atu0088	YlxR domain-containing protein	2.04109	0	0.198588
A9CKQ7	pnp Atu0082 AGR_C_124	Polyribonucleotide nucleotidyltransferase (EC 2.7.7.8) (Polynucleotide phosphorylase) (PNPase)	0.254119	1	0.0243417
A9CKQ8	Atu0080	Permease	DRM only	0	0.115365
A9CKQ9	Atu0077	D-isomer specific 2-hydroxyacid dehydrogenases family protein	0.631091	0	0.449139
A9CKR0	Atu0076	Uncharacterized protein	DSM only	0	0.18396
A9CKR1	Atu0075	N-acetyltransferase domain-containing protein	DRM only	0	0.22556
A9CKR2	Atu0072	Uncharacterized protein	5.52479	1	0.0184518
A9CKR5	frcA Atu0065	ABC transporter, nucleotide binding/ATPase protein (Sugar)	5.11125	0	0.185419
A9CKR6	frcC Atu0064	ABC transporter, membrane spanning protein (Sugar)	6.80194	0	0.0564611
A9CKR7	frcB Atu0063	ABC transporter, substrate binding protein (Sugar)	0.928106	0	0.799366
A9CKS0	actR Atu0050	Two component response regulator	0.240638	1	0.0121905
A9CKS1	Atu0048	YkuD domain-containing protein	11.6426	1	0.0196966
A9CKS2	Atu0046	Uncharacterized protein	0.455733	1	0.0222675
A9CKS6	Atu0027	Histidine kinase (EC 2.7.13.3)	8.35479	0	0.246176
A9CKT0	accD Atu0020 AGR_C_32	Acetyl-coenzyme A carboxylase carboxyl transferase subunit beta (ACCase subunit beta) (Acetyl-CoA carboxylase carboxyltransferase subunit beta) (EC 2.1.3.15)	1.33373	0	0.179499
A9CKT2	depA Atu0015	Intracellular PHB depolymerase	11.7103	1	0.0314757
A9CKT5	gyrB Atu0012	DNA gyrase subunit B (EC 5.6.2.2)	2.00464	0	0.0733412
A9CKT7	Atu0010	Smr domain-containing protein	DRM only	0	0.172827
A9CKT8	mltA Atu0009	Murein hydrolase A (EC 4.2.2.n1)	DRM only	0	0.183648
A9CKT9	fxsA Atu0007	Uncharacterized protein	DRM only	1	0.0396229
A9CKV4	apeA Atu6115	HEPN_Apea domain-containing protein	DRM only	0	0.42265
A9CKV5	Atu6114	Uncharacterized protein	DRM only	1	0.0236951
A9CKV6	Atu6113	UDP-N-acetylglucosamine kinase (EC 2.7.1.176)	DRM only	1	0.00431632
A9CKV8	Atu6109	Uncharacterized protein	DRM only	0	0.42265
A9CKW2	Atu6101	Helicase, SNF2 family	3.72887	0	0.115406
A9CKX4	Atu6083	Peptidase_S8 domain-containing protein	0.902331	0	0.884595
A9CKX6	Atu6079	Putative nitrilotriacetate monooxygenase	0.357393	0	0.343567
A9CKX8	Atu6077	Monooxygenase	DSM only	0	0.232442
A9CKY4	rbsA Atu6069	ABC transporter, nucleotide binding/ATPase protein (Ribose)	DRM only	0	0.0907916
A9CKY7	Atu6065	CMD domain-containing protein	DRM only	0	0.42265
A9CKY8	Atu6063	Oxidoreductase, GMC family	1.25934	0	0.678007
A9CKZ0	Atu6061	Nitrilotriacetate monooxygenase	DRM only	0	0.42265
A9CKZ3	ssuC Atu6057	ABC transporter, membrane spanning protein (Nitrate/sulfonates)	DRM only	0	0.98477
A9CKZ8	Atu6050	Uncharacterized protein	DSM only	0	0.364069
A9CL00	Atu6048	Helicase ATP-binding domain-containing protein	2.00107	0	0.566098
A9CL04	hyuB Atu6023	N-methylhydantoinase B/acetone carboxylase, alpha subunit	DRM only	0	0.466538
A9CL05	hyuA Atu6022	N-methylhydantoinase A/acetone carboxylase, beta subunit	DRM only	0	0.118689
A9CL20	Atu5547	Metallo-beta-lactamase superfamily protein	DRM only	0	0.179364
A9CL23	Atu5537	Pyridine nucleotide-disulphide oxidoreductase	DRM only	0	0.213858
A9CL31	Atu5518	NAD_binding_9 domain-containing protein	DRM only	0	0.42265
A9CL35	Atu5510	Uncharacterized protein	DRM only	0	0.624319
A9CL41	Atu5499	Oxidoreductase	DRM only	0	0.42265
A9CL48	Atu5482	ABC transporter, substrate binding protein (Amino acid)	DSM only	0	0.492605
A9CL54	Atu5475	VOC domain-containing protein	DRM only	0	0.42265
A9CL58	galE Atu5463	Putative UDP-glucose 4-epimerase	1.24748	0	0.365128
A9CL59	Atu5462	ABC transporter, nucleotide binding/ATPase protein	DRM only	0	0.42265
A9CL64	attE Atu5452	ABC transporter, nucleotide binding/ATPase protein	1.82941	0	0.517778
A9CL68	Atu5442	Methyl-accepting chemotaxis protein	2.50498	0	0.41145
A9CL75	Atu5434	AP_endonuc_2 domain-containing protein	DSM only	0	0.608677
A9CL80	Atu5424	Oxidoreductase	DSM only	0	0.18396
A9CL81	potG potA Atu5423	Spermidine/putrescine import ATP-binding protein PotA (EC 7.6.2.11)	5.69868	1	0.0350929
A9CL84	Atu5415	Flavin_Reduct domain-containing protein	DSM only	0	0.0540118
A9CL90	Atu5406	Transcriptional regulator, GntR family	0.54733	0	0.399616
A9CL91	Atu5403	ABC transporter, substrate binding protein (Sugar)	DRM only	0	0.100369
A9CL94	dapA Atu5398	Dihydrodipicolinate synthase	DRM only	0	0.825232
A9CL96	Atu5395	MFS permease	DRM only	0	0.134456
A9CL98	Atu5392	Transcriptional regulator, LysR family	DRM only	0	0.923547
A9CLA1	Atu5387	Uncharacterized protein	DRM only	0	0.184919
A9CLA3	Atu5384	Uncharacterized protein	DRM only	0	0.818838
A9CLA4	Atu5382	HlyD family secretion protein	1.02269	0	0.985532
A9CLA5	Atu5381	AcrB/AcrD/AcrF family protein	DRM only	0	0.113186
A9CLA6	Atu5377	Two component sensor kinase	DRM only	0	0.213367
A9CLB9	Atu5348	Lipase/esterase	DRM only	0	0.304335
A9CLC4	Atu5332	Uncharacterized protein	DRM only	0	0.42265
A9CLC8	Atu5328	D-isomer specific 2-hydroxyacid dehydrogenase, NAD-binding	DRM only	0	0.441227
A9CLD3	Atu5322	FMN_red domain-containing protein	DRM only	0	0.572208
A9CLD7	Atu5313	FAD-binding FR-type domain-containing protein	0.648069	0	0.184394
A9CLD8	Atu5312	ABC transporter, substrate binding protein (Iron)	DSM only	0	0.0847253
A9CLE3	Atu5299	Uncharacterized protein	1.03075	0	0.903295
A9CLE4	Atu5297	Hydrolase	0.531723	0	0.453244
A9CLE5	Atu5296	Arylester hydrolase	0.827867	0	0.597783
A9CLF4	Atu5280	Hydrolase	1.5328	0	0.59376
A9CLG3	Atu5270	Permease component of C4 dicarboxylate transporter	9.71684	1	0.0444355
A9CLG4	Atu5269	Permease component of C4 dicarboxylate transporter	10.5104	0	0.083088
A9CLG5	dctP Atu5268	ABC transporter, substrate binding protein	5.94879	0	0.125136
A9CLG7	Atu5265	Sugar binding protein	DSM only	0	0.985532
A9CLH0	Atu5260	Amide hydrolase	DRM only	1	0.00158371
A9CLH9	Atu5244	Uncharacterized protein	DRM only	0	0.923547
A9CLI8	Atu5230	GAF domain-containing protein	7.84167	0	0.215556
A9CLJ3	Atu5225	4-carboxymuconolactone decarboxylase	DRM only	0	0.42265
A9CLJ8	proV Atu5218	ABC transporter, nucleotide binding/ATPase protein (Glycine betaine/L-proline)	DRM only	0	0.193033
A9CLK2	Atu5211	Transcriptional regulator, MarR family	DSM only	0	0.157938
A9CLK6	Atu5207	Nitroreductase domain-containing protein	DRM only	1	0.00158371
A9CLL0	Atu5195	Transcriptional regulator, LysR family	DSM only	0	0.732341
A9CLL2	Atu5193	Peptidase	0.577775	0	0.342501
A9CLL7	Atu5177	Efflux protein	DSM only	0	0.201189
A9CLM0	avhB5 Atu5166	Type IV secretion protein AvhB5	DRM only	0	0.346282
A9CLM7	atrC Atu5123	Acetolactate synthase	0.0792811	0	0.281458
A9CLM8	fabG Atu5122	3-oxoacyl-(Acyl-carrier protein) reductase	DRM only	0	0.42265
A9CLN0	Atu5118	Aminotransferase, class II	1.03137	0	0.947079
A9CLN5	traD Atu5109	Conjugal transfer protein	DRM only	0	0.42265
A9CLN7	Atu5107	WGR domain-containing protein	DRM only	0	0.98477
A9CLP1	Atu5099	UmuC domain-containing protein	DRM only	0	0.396666
A9CLP5	rcdA Atu5090	Curdlan Synthase	DRM only	0	0.215404
A9CLP6	Atu5087	Two component sensor kinase	10.2005	0	0.196627
A9CLP8	Atu5081	ABC transporter, membrane spanning protein (Sugar)	DRM only	0	0.184884
A9CLQ0	Atu5076	Uncharacterized protein	DRM only	0	0.0671413
A9CLQ2	attL Atu5074	Iron alcohol dehydrogenase	4.08219	1	0.0157779
A9CLQ4	dppA Atu5071	ABC transporter, substrate binding protein (Dipeptide)	0.868584	0	0.59802
A9CLQ6	Atu5069	ABC transporter, membrane spanning protein (Oligopeptide)	DRM only	0	0.288025
A9CLQ7	Atu5068	ABC transporter, nucleotide binding/ATPase protein (Oligopeptide)	3.51569	0	0.199015
A9CLR0	ugpC Atu5062	ABC transporter, nucleotide binding/ATPase protein (Glycerol-3-phosphate)	DSM only	0	0.612471
A9CLS5	Atu5028	IS426 transposase	DRM only	0	0.42265
A9CLS7	Atu5022	KAP NTPase domain-containing protein	5.24086	0	0.260471
O34171	fliI Atu0557 AGR_C_980	Flagellum-specific ATP synthase (EC 7.1.2.2)	DSM only	0	0.361482
O85128	cheB Atu0519 AGR_C_916	Protein-glutamate methylesterase/protein-glutamine glutaminase (EC 3.1.1.61) (EC 3.5.1.44)	2.07875	0	0.3873
P07545	virG Atu6178 AGR_pTi_15	Regulatory protein VirG	5.36062	0	0.232838
P0A2V0	ndvA chvA Atu2728 AGR_C_4944	Beta-(1-->2)glucan export ATP-binding/permease protein NdvA (EC 7.5.2.3) (Attachment protein)	DRM only	1	0.0475424
P0A331	ftsA Atu2087 AGR_C_3785	Cell division protein FtsA	DSM only	0	0.663936
P0A3B5	efp chvH Atu2553 AGR_C_4625	Elongation factor P (EF-P)	0.152641	1	0.00523466
P0A3F2	glgA1 glgA Atu4075 AGR_L_1562	Glycogen synthase 1 (EC 2.4.1.21) (Starch [bacterial glycogen] synthase 1)	0.771733	0	0.511082
P0A3I8	hrcA Atu0328 AGR_C_572	Heat-inducible transcription repressor HrcA	1.182	0	0.711719
P0A3Q5	miaA Atu2039 AGR_C_3695	tRNA dimethylallyltransferase (EC 2.5.1.75) (Dimethylallyl diphosphate:tRNA dimethylallyltransferase) (DMAPP:tRNA dimethylallyltransferase) (DMATase) (Isopentenyl-diphosphate:tRNA isopentenyltransferase) (IPP transferase) (IPPT) (IPTase)	0.518197	0	0.457737
P0A4E3	rpoA Atu1923 AGR_C_3518	DNA-directed RNA polymerase subunit alpha (RNAP subunit alpha) (EC 2.7.7.6) (RNA polymerase subunit alpha) (Transcriptase subunit alpha)	0.413249	0	0.0628799
P17794	virB4 Atu6170 AGR_pTi_8	Protein virB4	DSM only	0	0.365454
P17799	virB9 Atu6175 AGR_pTi_12	Protein virB9	DSM only	0	0.576485
P17800	virB10 Atu6176 AGR_pTi_13	Protein virB10	DRM only	0	0.568287
P18592	virD2 Atu6182 AGR_pTi_21	T-DNA border endonuclease VirD2 (EC 3.1.-.-)	DRM only	0	0.42265
P18593	virD3 Atu6183 AGR_pTi_22	Protein VirD3	0.382579	0	0.150543
P18594	virD4 Atu6184 AGR_pTi_23	Protein VirD4	DRM only	0	0.657756
P24404	leuB Atu2791 AGR_C_5067	3-isopropylmalate dehydrogenase (EC 1.1.1.85) (3-IPM-DH) (Beta-IPM dehydrogenase) (IMDH)	DRM only	0	0.0778735
P25548	chvE Atu2348 AGR_C_4267	Multiple sugar-binding periplasmic receptor ChvE	0.280297	0	0.0505759
P30779	groL groEL mopA Atu0682 AGR_C_1220	60 kDa chaperonin (GroEL protein) (Protein Cpn60)	0.113562	1	0.0455111
P30780	groS groES Atu0683 AGR_C_1221	10 kDa chaperonin (GroES protein) (Protein Cpn10)	0.32924	1	0.019489
P33156	recA Atu1874 AGR_C_3441	Protein RecA (Recombinase A)	1.30473	0	0.162267
P33452	rpoD sigA Atu2167 AGR_C_3929	RNA polymerase sigma factor RpoD (Major vegetative sigma factor) (Sigma-70)	0.553621	0	0.164699
P50018	dnaJ Atu0121 AGR_C_192	Chaperone protein DnaJ	1.30189	0	0.174687
P50019	dnaK Atu0122 AGR_C_195	Chaperone protein DnaK (HSP70) (Heat shock 70 kDa protein) (Heat shock protein 70)	0.612031	1	0.0208013
P58665	ispG gcpE Atu2723 AGR_C_4936	4-hydroxy-3-methylbut-2-en-1-yl diphosphate synthase (flavodoxin) (EC 1.17.7.3) (1-hydroxy-2-methyl-2-(E)-butenyl 4-diphosphate synthase)	DRM only	0	0.42265
P58673	ispH lytB Atu0774 AGR_C_1414	4-hydroxy-3-methylbut-2-enyl diphosphate reductase (HMBPP reductase) (EC 1.17.7.4)	DRM only	0	0.311294
P58739	dadA Atu3293 AGR_L_3050	D-amino acid dehydrogenase (EC 1.4.99.-)	3.11468	1	0.00486825
P58740	uppP1 bacA1 upk1 Atu0294 AGR_C_505	Undecaprenyl-diphosphatase 1 (EC 3.6.1.27) (Bacitracin resistance protein 1) (Undecaprenyl pyrophosphate phosphatase 1)	DRM only	0	0.0746466
P58741	uppP2 bacA2 upk2 Atu0998 AGR_C_1833	Undecaprenyl-diphosphatase 2 (EC 3.6.1.27) (Bacitracin resistance protein 2) (Undecaprenyl pyrophosphate phosphatase 2)	DRM only	1	0.00551722
P58745	rsmH mraW Atu2102 AGR_C_3815	Ribosomal RNA small subunit methyltransferase H (EC 2.1.1.199) (16S rRNA m(4)C1402 methyltransferase) (rRNA (cytosine-N(4)-)-methyltransferase RsmH)	0.61976	0	0.541044
P58788	hisH Atu0041 AGR_C_64	Imidazole glycerol phosphate synthase subunit HisH (EC 4.3.2.10) (IGP synthase glutaminase subunit) (EC 3.5.1.2) (IGP synthase subunit HisH) (ImGP synthase subunit HisH) (IGPS subunit HisH)	DRM only	0	0.198247
P58795	Atu1728 AGR_C_3175	NAD(P)H dehydrogenase (quinone) (EC 1.6.5.2) (Flavoprotein WrbA) (NAD(P)H:quinone oxidoreductase) (NQO)	DRM only	1	0.000603712
P58799	hisF Atu0039 AGR_C_62	Imidazole glycerol phosphate synthase subunit HisF (EC 4.3.2.10) (IGP synthase cyclase subunit) (IGP synthase subunit HisF) (ImGP synthase subunit HisF) (IGPS subunit HisF)	DRM only	0	0.42265
P63187	grpE Atu0329 AGR_C_573	Protein GrpE (HSP-70 cofactor)	0.233205	1	0.0158994
P68995	rpmD Atu1928.1 AGR_C_3526	50S ribosomal protein L30	0.740484	0	0.382614
Q07737	chvG Atu0033 AGR_C_52	Sensor protein ChvG (EC 2.7.13.3)	6.35555	1	0.0059425
Q44342	flgH Atu0548 AGR_C_967	Flagellar L-ring protein (Basal body L-ring protein)	DRM only	0	0.184884
Q44346	traG Atu6124 AGR_pTi_bx12	Conjugal transfer protein TraG	DRM only	0	0.183504
Q44349	traA Atu6127 AGR_pTi_237	Conjugal transfer protein TraA	DRM only	0	0.294771
Q7CNV9	Atu6155	Uncharacterized protein	DSM only	0	0.272348
Q7CRC8	Atu3012	Uncharacterized protein	DSM only	0	0.201189
Q7CRD6	Atu3020	Transcriptional regulator, GntR family	DSM only	0	0.23988
Q7CRF1	Atu3035	Two component response regulator	DRM only	0	0.42265
Q7CRF6	Atu3040	Uncharacterized protein	DRM only	0	0.42265
Q7CRG2	Atu3046	Oxidoreductase	DRM only	0	0.118689
Q7CRG6	Atu3050	Putative AgaE	18.0891	0	0.0696548
Q7CRG9	Atu3053	ABC transporter, nucleotide binding/ATPase protein (Peptide)	DSM only	1	0.00417746
Q7CRH1	Atu3055	Uncharacterized protein	DSM only	0	0.221483
Q7CRI8	Atu3073	Aspartate racemase	DSM only	0	0.218642
Q7CRJ1	uraA Atu3076	Uracil transport protein	DRM only	0	0.0846276
Q7CRJ6	Atu3081	Uncharacterized protein	DRM only	0	0.895839
Q7CRK5	Atu3091	Uncharacterized protein	12.071	0	0.0565297
Q7CRM1	Atu3107	Transcriptional regulator, LacI family	1.44541	0	0.552659
Q7CRM5	Atu3111	ABC transporter, nucleotide binding/ATPase protein (Sugar)	2.9531	1	0.0173082
Q7CRM8	Atu3114	ABC transporter, substrate binding protein (Sugar)	DRM only	0	0.42265
Q7CRN4	cspA Atu3121	Cold shock protein	DSM only	0	0.237753
Q7CRN5	Atu3122	Cold shock protein	0.544421	0	0.583772
Q7CRT6	Atu3179	ABC transporter, membrane spanning protein	DRM only	0	0.245643
Q7CRT8	Atu3181	CobW C-terminal domain-containing protein	2.44384	0	0.0520131
Q7CRU3	ugpA Atu3186 AGR_L_3247	sn-glycerol-3-phosphate transport system permease protein UgpA	DRM only	1	0.0487187
Q7CRV2	speF Atu3196	Ornithine decarboxylase	DSM only	0	0.0687708
Q7CRV3	ptxR Atu3197	Transcriptional regulator, LysR family	1.73864	0	0.432417
Q7CRV9	Atu3203	RND multidrug efflux membrane permease	DRM only	0	0.252566
Q7CRW1	Atu3205	Uncharacterized protein	DSM only	0	0.144619
Q7CRW2	Atu3206	Uncharacterized protein	DRM only	0	0.88986
Q7CRW5	Atu3210	DNA translocase FtsK	DRM only	0	0.0628391
Q7CRW6	Atu3212	ABC transporter, substrate binding protein (Oligopeptide)	1.15185	0	0.796248
Q7CRY0	Atu3227	Transcriptional regulator, AraC family	DRM only	0	0.567412
Q7CRY4	Atu3232	Hydroxypyruvate reductase	DRM only	0	0.42265
Q7CRY6	Atu3235	AP_endonuc_2 domain-containing protein	DSM only	0	0.181698
Q7CRZ2	Atu3241	Dehydrogenase	DSM only	0	0.399847
Q7CRZ4	gatA Atu3243	Indole-3-acetamide hydrolase (Indoleacetamide hydrolase)	DSM only	0	0.27925
Q7CS11	Atu3264	Transcriptional regulator, IclR family	1.48047	0	0.727061
Q7CS19	pssN Atu3272	Exopolysaccharide export protein	DRM only	0	0.199471
Q7CS20	Atu3273	HlyD family secretion protein	3.97479	1	0.0191003
Q7CS28	Atu3281	ABC transporter, nucleotide binding/ATPase protein	DRM only	0	0.236239
Q7CS34	Atu3287	Thiamine biosynthesis associated protein	DSM only	0	0.318328
Q7CS36	Atu3294	Transcriptional regulator, GntR family	DSM only	0	0.665108
Q7CS37	Atu3295	Lectin-like protein BA14k	6.57921	0	0.126183
Q7CS39	dctB Atu3297	Histidine kinase (EC 2.7.13.3)	DRM only	0	0.355156
Q7CS43	celD Atu3302	Cellulose biosynthesis protein	DRM only	0	0.356957
Q7CS44	celE Atu3303	Cellulose synthesis protein	DRM only	0	0.42265
Q7CS46	celB Atu3308	Cyclic di-GMP-binding protein (Cellulose synthase regulatory subunit)	DRM only	1	0.0291068
Q7CS49	Atu3312	GH26 domain-containing protein	DRM only	0	0.657756
Q7CS59	Atu3323	Membrane fusion protein (MFP) family protein	DRM only	0	0.184884
Q7CS63	exoY Atu3327	Succinoglycan exopolysaccharide synthesis protein	0.182083	1	0.00336657
Q7CS66	mclA Atu3330	Methyl-accepting chemotaxis protein	DSM only	0	0.73161
Q7CS68	Atu3332	Uncharacterized protein	DRM only	0	0.124539
Q7CS72	thuR Atu3337	Transcriptional regulator, LacI family	DRM only	0	0.87602
Q7CS92	Atu3357	ABC transporter, substrate binding protein (Amino acid)	1.03001	0	0.870032
Q7CS93	Atu3358	ABC transporter, membrane spanning protein (Amino acid)	DRM only	1	0.0390537
Q7CS95	Atu3360	ABC transporter, nucleotide binding/ATPase protein (Amino acid)	1.3962	0	0.246918
Q7CSA0	Atu3365	Uncharacterized protein	DRM only	0	0.28229
Q7CSB6	prsE2 Atu3382	Membrane fusion protein (MFP) family protein	DRM only	0	0.42265
Q7CSB9	hasR Atu3385	Heme receptor	DRM only	0	0.841823
Q7CSD2	Atu3399	2-hydroxyacid dehydrogenase	DRM only	0	0.184884
Q7CSF3	Atu3420	Monooxygenase	DRM only	0	0.781331
Q7CSF4	Atu3421	Bac_luciferase domain-containing protein	DRM only	0	0.42265
Q7CSF6	Atu3424	Acyl-CoA_dh_N domain-containing protein	0.052094	0	0.172704
Q7CSJ7	bkdB Atu3471	Dihydrolipoamide acetyltransferase component of pyruvate dehydrogenase complex (EC 2.3.1.-)	DRM only	0	0.399933
Q7CSK4	mccB Atu3478	3-methylcrotonoyl-CoA carboxylase beta subunit	DSM only	0	0.152443
Q7CSK5	mccA Atu3479	3-methylcrotonyl-CoA carboxylase alpha subunit	DSM only	0	0.245183
Q7CSK7	Atu3481	Enoyl-CoA hydratase/isomerase family protein	DRM only	0	0.304539
Q7CSM1	Atu3498	Aldehyde dehydrogenase	0.408618	0	0.0611182
Q7CSM5	Atu3503	Sulfate transport system permease protein CysT	0.916851	0	0.91292
Q7CSM6	Atu3504	ABC transporter, substrate binding protein (Sulfate)	2.30887	0	0.0693329
Q7CSM8	Atu3506	Uncharacterized protein	0.203575	1	0.00558009
Q7CSM9	Atu3507	SH3b domain-containing protein	3.56804	1	0.0479407
Q7CSN1	Atu3510	Amidohydrolase	1.29917	0	0.749132
Q7CSN8	ppiD Atu3519	Parvulin-like PPIase (Peptidyl-prolyl cis-trans isomerase plp) (Rotamase plp)	0.320232	0	0.0602975
Q7CSN9	secA Atu3520 AGR_L_2621	Protein translocase subunit SecA (EC 7.4.2.8)	0.826584	0	0.486887
Q7CSR8	Atu3554	Uncharacterized protein	DRM only	0	0.213858
Q7CSS2	Atu3558	Glycosyltransferase	0.723939	0	0.693397
Q7CSS3	Atu3559	Glycosyltransferase	DRM only	0	0.237959
Q7CST1	Atu3568	TPR_REGION domain-containing protein	0.801612	0	0.648632
Q7CST3	Atu3570	YcaO domain-containing protein	DSM only	1	0.0417527
Q7CST8	xylH Atu3575	ABC transporter, membrane spanning protein (Xylose)	DRM only	0	0.0792749
Q7CSU1	glpD Atu3578	Glycerol-3-phosphate dehydrogenase (EC 1.1.5.3)	DRM only	0	0.441227
Q7CSU4	pccA Atu3581	Propionyl-CoA carboxylase (EC 6.4.1.3)	0.161689	0	0.149397
Q7CSU6	Atu3585	Glutathione S-transferase	1.35187	0	0.56927
Q7CSU7	Atu3586	Propionyl-CoA carboxylase	DSM only	0	0.166168
Q7CSU8	Atu3587	Transcriptional regulator	DRM only	0	0.409796
Q7CSU9	alkA Atu3588	DNA-3-methyladenine glycosidase II	DRM only	0	0.0766072
Q7CSV2	Atu3591	Short chain dehydrogenase	2.00898	0	0.344539
Q7CSV3	Atu3593	Corrinoid adenosyltransferase (EC 2.5.1.17)	DSM only	0	0.125912
Q7CSV4	Atu3594	Rhomboid domain-containing protein	DRM only	1	0.049807
Q7CSW1	Atu3602	Uncharacterized protein	3.15203	0	0.175546
Q7CSX0	tyrC Atu3611	Prephenate dehydrogenase	DRM only	0	0.42265
Q7CSX1	Atu3613	Methyltransf_11 domain-containing protein	1.21007	0	0.731848
Q7CSX4	Atu3616	Uncharacterized protein	1.07015	0	0.851017
Q7CSY1	dnaJ Atu3623	Molecular chaperone, DnaJ family	0.351171	1	0.0413808
Q7CSY3	aroK Atu3626	Shikimate kinase (SK) (EC 2.7.1.71)	0.792813	0	0.661977
Q7CSY6	Atu3631	Uncharacterized protein	DRM only	0	0.0678801
Q7CSY9	dacF Atu3634	Penicillin-binding protein dacf	0.7519	0	0.49155
Q7CSZ0	Atu3635	Amidohydrolase	DRM only	0	0.164782
Q7CSZ3	Atu3639	Uncharacterized protein	0.929521	0	0.933887
Q7CSZ6	vgrG Atu3642	VgrG protein	1.21527	0	0.451546
Q7CT08	Atu3662	Uncharacterized protein	1.5169	0	0.319574
Q7CT15	Atu3670	Siderophore biosynthesis protein	DRM only	0	0.159482
Q7CT25	Atu3681	Polyketide synthetase, siderophore biosynthesis protein	DRM only	0	0.42265
Q7CT27	Atu3683	Peptide synthetase, siderophore biosynthesis protein	1.66672	1	0.0244396
Q7CT31	Atu3687	TonB-dependent receptor	DRM only	0	0.401547
Q7CT36	Atu3692	Sigma factor	DSM only	0	0.0832901
Q7CT38	pbpC Atu3694	Penicillin-insensitive transglycosylase (EC 2.4.1.129) (Peptidoglycan TGase)	0.550661	0	0.542676
Q7CT39	Atu3695	TPR_REGION domain-containing protein	0.316614	0	0.153271
Q7CT40	lonD Atu3697	ATP-dependent protease LA 2	DRM only	0	0.0794004
Q7CT41	Atu3698	Putative thioredoxin	0.124134	0	0.320282
Q7CT45	Atu3705	Tim44 domain-containing protein	36.6158	1	0.000937636
Q7CT48	Atu3708	Outer surface protein	DRM only	0	0.102679
Q7CT50	ftsH Atu3710	ATP-dependent zinc metalloprotease FtsH (EC 3.4.24.-)	3.20477	0	0.122033
Q7CT52	cpoB Atu3712	Cell division coordinator CpoB	0.793237	0	0.776225
Q7CT55	tolQ Atu3717	Tol-Pal system protein TolQ	18.046	1	0.0203498
Q7CT60	Atu3725	Methyl-accepting chemotaxis protein	0.500684	0	0.312983
Q7CT66	Atu3732	Hemolysin	2.10498	0	0.151743
Q7CT69	Atu3738	Na+/H+ antiporter	DRM only	1	0.0473369
Q7CT75	motB Atu3746	Flagellar motor protein	21.9193	1	0.00793291
Q7CT76	Atu3747	Uncharacterized protein	11.6855	1	0.000287183
Q7CT79	thiE Atu3750	Thiamine-phosphate pyrophosphorylase	DSM only	0	0.755435
Q7CT90	Atu3763	Uncharacterized protein	DRM only	0	0.241878
Q7CT92	pepF Atu3765	Oligoendopeptidase F	1.24443	0	0.786263
Q7CT93	Atu3766	Probable branched-chain-amino-acid aminotransferase	DRM only	0	0.237794
Q7CT96	Atu3770	5'-nucleotidase	1.35867	0	0.195568
Q7CT99	kpsF Atu3774	Capsule expression protein	DSM only	0	0.875004
Q7CTA1	Atu3777	Uncharacterized protein	DSM only	0	0.449907
Q7CTA4	Atu3780	Uncharacterized protein	12.0066	0	0.0553572
Q7CTA8	gltB Atu3784	Glutamate synthase large subunit	3.37733	0	0.216117
Q7CTB1	kdpD Atu3787	Histidine kinase (EC 2.7.13.3)	DRM only	0	0.217085
Q7CTB6	Atu3794	Transcriptional regulator, FadR/GntR family	2.73427	0	0.27711
Q7CTC0	Atu3798	Transcriptional regulator, TetR family	DRM only	0	0.923547
Q7CTC1	hutC Atu3799	Transcriptional regulator, GntR family	0.979096	0	0.933498
Q7CTD7	Atu3815	Transcriptional regulator, GntR family	DRM only	0	0.0771873
Q7CTD8	fdh Atu3816	D-threo-aldose 1-dehydrogenase	DSM only	0	0.0751402
Q7CTE3	rbsB Atu3821	ABC transporter, substrate binding protein (Ribose)	0.38376	0	0.292139
Q7CTG0	Atu3843	Uncharacterized protein	DSM only	0	0.425759
Q7CTG4	Atu3849	Resolvase	DRM only	0	0.616434
Q7CTG8	Atu3854	AAA domain-containing protein	DRM only	0	0.441554
Q7CTH2	exsE Atu3863	ABC transporter, nucleotide binding/ATPase protein	DRM only	1	0.0236557
Q7CTH3	Atu3865	TGc domain-containing protein	0.163072	0	0.0836938
Q7CTH6	Atu3868	VWFA domain-containing protein	DRM only	0	0.42265
Q7CTH7	Atu3869	ABC transporter, nucleotide binding/ATPase protein	2.52619	1	0.0173797
Q7CTI1	Atu3873	Uncharacterized protein	0.723939	0	0.693397
Q7CTI6	Atu3878	Transcriptional regulator	DRM only	0	0.42265
Q7CTK5	cysG Atu3899	Uroporphyrinogen III methylase (EC 1.3.1.76) (EC 2.1.1.107) (Uroporphyrinogen-III C-methyltransferase)	DRM only	0	0.42265
Q7CTK6	nasA Atu3900	Nitrate reductase large subunit	DSM only	0	0.793689
Q7CTK8	nirB Atu3902	Nitrite reductase large subunit	1.77501	0	0.501407
Q7CTL5	Atu3909	Conserved hypothetical	DRM only	1	0.00638232
Q7CTL7	Atu3912	Uncharacterized protein	DSM only	0	0.18396
Q7CTM1	bfrA Atu3916	Exogenous ferric siderophore receptor	0.140877	0	0.264702
Q7CTM2	Atu3917	HTH lysR-type domain-containing protein	DRM only	0	0.172412
Q7CTM7	repA Atu3924	Replication protein A	DRM only	0	0.0929182
Q7CTN1	Atu3928	Microcystinase C (MlrC)	DRM only	0	0.28229
Q7CTP3	arcB Atu3949	Ornithine cyclodeaminase	DRM only	0	0.413269
Q7CTQ2	Atu3958	Oxidoreductase	DRM only	0	0.151871
Q7CTQ7	Atu3963	Transcriptional regulator, GntR family	DRM only	0	0.641742
Q7CTR3	Atu3969	ABC transporter, membrane spanning protein (Sugar)	DRM only	1	0.0186867
Q7CTR4	Atu3970	ABC transporter, nucleotide binding/ATPase protein (Sugar)	1.07	0	0.657453
Q7CTS0	Atu3976	TPR_REGION domain-containing protein	DRM only	0	0.42265
Q7CTS8	Atu3986	Exonuclease domain-containing protein	DRM only	0	0.0766072
Q7CTU0	fabH Atu4001	3-oxoacyl-(Acyl-carrier-protein) synthase III	DSM only	0	0.291205
Q7CTU5	arcA Atu4007	Arginase (EC 3.5.3.1)	0.465379	0	0.560266
Q7CTV4	kgtP Atu4017	MFS permease	DRM only	1	0.0335952
Q7CTV5	Atu4018	Histidine kinase (EC 2.7.13.3)	2.67163	0	0.133039
Q7CTW2	fhuC Atu4025	ABC transporter, nucleotide binding/ATPase protein (Ferrichrome)	DRM only	0	0.353705
Q7CTW5	Atu4029	Gluconolactonase	DSM only	0	0.475896
Q7CTX0	Atu4034	Two component sensor kinase	3.92576	0	0.0893655
Q7CTX1	Atu4035	Two component response regulator	1.39671	0	0.427251
Q7CTX3	gcd Atu4037	Glucose dehydrogenase	1.23043	0	0.506313
Q7CTX8	Atu4044	ABC transporter, nucleotide binding/ATPase protein (Glycine betaine)	DRM only	0	0.157713
Q7CTX9	Atu4045	ABC transporter, membrane spanning protein (Glycine betaine)	DRM only	0	0.183944
Q7CTY1	Atu4047	Histidine kinase (EC 2.7.13.3)	4.06677	0	0.301828
Q7CTY2	Atu4048	2-hydroxyacid dehydrogenase	DRM only	0	0.183504
Q7CTY7	exoA Atu4053	Succinoglycan biosynthesis protein	8.75969	1	0.0164571
Q7CTY9	exoK Atu4055	Endo-1,3-1,4-beta-glycanase	15.2829	1	0.025872
Q7CTZ1	exoT Atu4057	Succinoglycan biosynthesis transport protein	DRM only	0	0.128017
Q7CTZ4	exoU Atu4060	Succinoglycan biosynthesis glycosyltransferase	DSM only	0	0.218642
Q7CTZ5	exoX Atu4061	Exopolysaccharide production repressor protein	DRM only	0	0.237794
Q7CTZ7	Atu4063	O-linked GlcNAc transferase	7.6388	0	0.0544587
Q7CTZ8	soxB Atu4066	Sarcosine oxidase beta subunit	0.309021	1	0.0387051
Q7CU06	exoC Atu4074	Phosphoglucomutase	0.612915	0	0.368475
Q7CU15	Atu4088	HTH-type transcriptional regulator	DRM only	0	0.0934261
Q7CU16	cydD Atu4089	ABC transporter, nucleotide binding/ATPase protein	DRM only	0	0.183504
Q7CU26	rpsA Atu4104	30S ribosomal protein S1	0.173689	1	0.0200828
Q7CU40	Atu4121	Monooxygenase	DRM only	0	0.22556
Q7CU52	Atu4134	Uncharacterized protein	6.99374	1	0.00473661
Q7CU63	Atu4145	Uncharacterized protein	DRM only	0	0.343813
Q7CU65	gshB Atu4147	Glutathione synthetase (EC 6.3.2.3) (GSH synthetase) (GSH-S) (GSHase) (Glutathione synthase)	3.77082	1	0.0269959
Q7CU70	Atu4153	Aldehyde dehydrogenase (NAD(+)) (EC 1.2.1.3)	0.949213	0	0.953813
Q7CU78	Atu4162	Two component response regulator	0.729406	0	0.501671
Q7CU79	Atu4163	Two component sensor kinase	6.84791	0	0.0716779
Q7CU80	Atu4164	Two component sensor kinase	4.84643	0	0.16337
Q7CU82	exoB galE Atu4166	UDP-glucose 4-epimerase (EC 5.1.3.2)	7.95484	0	0.163464
Q7CU84	Atu4168	DUF883_C domain-containing protein	5.18214	0	0.207817
Q7CU91	Atu4176	DUF4167 domain-containing protein	DSM only	1	0.0484498
Q7CU92	clpB Atu4177 AGR_L_1346	Chaperone protein ClpB	0.240082	1	0.0345646
Q7CU99	Atu4192	ABC transporter, substrate binding protein (Oligopeptide)	DRM only	0	0.100301
Q7CUA2	Atu4195	ABC transporter, nucleotide binding/ATPase protein (Oligopeptide)	DRM only	0	0.42265
Q7CUB1	Atu4204	Transcriptional regulator, AraC family	DRM only	1	0.027971
Q7CUC1	cspA Atu4214	Cold shock protein	0.58961	0	0.265908
Q7CUC4	Atu4217	Transcriptional regulator, TetR family	DSM only	0	0.261431
Q7CUC5	Atu4218	Multidrug efflux protein	DSM only	0	0.365528
Q7CUD9	Atu4232	Transcriptional regulator, GntR family	DRM only	0	0.530164
Q7CUF9	Atu4253	Uncharacterized protein	DRM only	0	0.266071
Q7CUG2	Atu4256	ABC transporter, nucleotide binding/ATPase protein (Oligopeptide)	1.54843	0	0.21083
Q7CUG3	Atu4257	ABC transporter, membrane spanning protein (Oligopeptide)	DRM only	1	5.39747e-05
Q7CUI4	nac Atu4279	Transcriptional regulator, LysR family	DRM only	0	0.822111
Q7CUK3	Atu4299	Uncharacterized protein	DRM only	0	0.183504
Q7CUK9	Atu4305	Histidine kinase (EC 2.7.13.3)	DRM only	0	0.311181
Q7CUL1	Atu4308	Uncharacterized protein	DRM only	1	0.00158371
Q7CUM0	Atu4317	Transcriptional regulator, TetR family	DRM only	0	0.42265
Q7CUM3	rbsA Atu4321	ABC transporter, nucleotide binding/ATPase protein (Ribose)	1.67242	0	0.18039
Q7CUN1	impN Atu4330	Serine/threonine protein kinase	DRM only	0	0.333992
Q7CUN2	impM Atu4331	Serine/threonine phosphoprotein phosphatase	1.47456	0	0.32577
Q7CUN4	impK Atu4333	OmpA-like porin	3.84522	1	0.0134618
Q7CUP0	impE Atu4339	Uncharacterized protein	0.771058	0	0.742258
Q7CUP5	clpB Atu4344	ATP-dependent Clp protease, ATP-binding subunit	5.46683	0	0.0522819
Q7CUP8	Atu4347	Uncharacterized protein	1.51968	0	0.266335
Q7CUQ0	Atu4349	DUF4123 domain-containing protein	0.471773	0	0.0905475
Q7CUQ2	Atu4351	Uncharacterized protein	0.595289	0	0.103916
Q7CUR8	gstR Atu4367	Transcriptional regulator, LysR family	DRM only	0	0.42265
Q7CUT7	norQ Atu4387	Nitric oxide reductase NorQ protein	DRM only	0	0.825232
Q7CUW1	rzcA Atu4412	Rhizobiocin/RTX toxin	DRM only	1	0.0242219
Q7CUW3	rspE Atu4414	Membrane fusion protein (MFP) family protein	DRM only	0	0.889297
Q7CUW4	Atu4415	Uncharacterized protein	DRM only	0	0.889297
Q7CUW8	Atu4420	Transcriptional regulator, LacI family	DRM only	0	0.42265
Q7CUX4	ade2 adeC Atu4426 AGR_L_883	Adenine deaminase 2 (Adenase 2) (Adenine aminase 2) (EC 3.5.4.2)	DRM only	0	0.199471
Q7CUX5	Atu4427	Replicative DNA helicase	DSM only	0	0.196334
Q7CUZ9	mtlK Atu4451	Mannitol 2-dehydrogenase	0.0784326	0	0.216142
Q7CV04	nth Atu4457	Endonuclease III (EC 4.2.99.18) (DNA-(apurinic or apyrimidinic site) lyase)	DRM only	0	0.306926
Q7CV11	Atu4466	Oxidoreductase	0.130183	0	0.0649856
Q7CV14	sitC Atu4469	ABC transporter, membrane spanning protein (Iron)	DRM only	0	0.188564
Q7CV15	sitB Atu4470	ABC transporter, nucleotide binding/ATPase protein (Iron)	2.76019	0	0.173498
Q7CV16	sitA Atu4471	ABC transporter, substrate binding protein (Iron)	2.68496	0	0.128022
Q7CV21	emrA Atu4478	Multidrug resistance efflux pump	DRM only	0	0.0935495
Q7CV33	Atu4492	CHAD domain-containing protein	DRM only	0	0.10819
Q7CV35	kdgA Atu4494	Keto-hydroxyglutarate-aldolase/keto-deoxy-phosphogluconate aldolase	DSM only	0	0.282449
Q7CV36	Atu4495	Uncharacterized protein	0.507645	0	0.0505346
Q7CV45	Atu4504	Transcriptional regulator, MarR family	DSM only	0	0.561704
Q7CV46	pckR Atu4505	Transcriptional regulator, LacI family	1.91093	0	0.0652854
Q7CV59	livJ Atu4519	ABC transporter, substrate binding protein (Branched amino acid)	2.96291	0	0.069957
Q7CV62	Atu4523	ABC transporter, membrane spanning protein (Oligopeptide)	DRM only	0	0.764707
Q7CV68	Atu4530	Transcriptional regulator, TetR family	DSM only	0	0.183563
Q7CV70	Atu4533	ABC transporter, nucleotide binding/ATPase protein (Amino acid)	3.39287	1	0.0229435
Q7CV76	pcaG Atu4539	Protocatechuate 3,4-dioxygenase alpha chain	DSM only	0	0.338801
Q7CV77	pcaH Atu4540	Protocatechuate 3,4-dioxygenase beta chain	DSM only	0	0.169027
Q7CV85	pcaF Atu4549	3-oxoadipyl-CoA thiolase (EC 2.3.1.174)	0.323592	1	0.0327743
Q7CV86	Atu4550	Transcriptional regulator, LacI family	DRM only	0	0.0636409
Q7CVA5	Atu4571	ABC transporter, membrane spanning protein	DRM only	0	0.184884
Q7CVB0	Atu4576	Transcriptional regulator, ROK family	0.147091	0	0.164947
Q7CVC6	Atu4592	Uncharacterized protein	DRM only	1	0.0484217
Q7CVD9	Atu4606	Uncharacterized protein	1.83906	0	0.146455
Q7CVE5	rfbA Atu4615	Glucose-1-phosphate thymidylyltransferase (EC 2.7.7.24)	DRM only	0	0.0902186
Q7CVE9	uvrD Atu4619	DNA helicase (EC 3.6.4.12)	0.633176	0	0.688055
Q7CVF6	Atu4626	ABC transporter, substrate binding protein (Oligopeptide)	9.82917	0	0.317505
Q7CVF7	Atu4627	Uncharacterized protein	DRM only	1	0.0192233
Q7CVG9	Atu4640	Uncharacterized protein	DRM only	0	0.194155
Q7CVH1	katG Atu4642 AGR_L_481	Catalase-peroxidase (CP) (EC 1.11.1.21) (Peroxidase/catalase)	0.217531	0	0.11118
Q7CVH8	Atu4649	Carbohydrate kinase	DRM only	0	0.877012
Q7CVI8	melA Atu4660	Alpha-galactosidase	DSM only	0	0.423443
Q7CVJ5	Atu4667	ABC transporter, nucleotide binding/ATPase protein	15.4312	0	0.135682
Q7CVJ7	Atu4669	Uncharacterized protein	DRM only	0	0.889297
Q7CVJ9	Atu4674	Transcriptional regulator, GntR family	DRM only	0	0.663004
Q7CVL4	Atu4690	ABC transporter, nucleotide binding/ATPase protein (Amino acid)	DRM only	0	0.0763156
Q7CVL6	Atu4692	GGDEF family protein	0.292572	0	0.353574
Q7CVM2	Atu4698	Hydrolase	0.681793	0	0.732677
Q7CVN2	fdhF Atu4708	Formate dehydrogenase alpha subunit	DSM only	0	0.138893
Q7CVN4	Atu4710	MFS permease	14.1638	1	0.00871866
Q7CVN5	Atu4711	Histidine kinase (EC 2.7.13.3)	DRM only	0	0.141814
Q7CVP5	Atu4723	ABC transporter, nucleotide binding/ATPase protein	DRM only	0	0.172069
Q7CVQ5	acnB Atu4734	(2R,3S)-2-methylisocitrate dehydratase (EC 4.2.1.3) ((2S,3R)-3-hydroxybutane-1,2,3-tricarboxylate dehydratase) (Probable 2-methyl-cis-aconitate hydratase)	2.63884	0	0.235525
Q7CVQ6	Atu4736	Methyl-accepting chemotaxis protein	DRM only	0	0.114607
Q7CVT1	gabD Atu4762	Succinate semialdehyde dehydrogenase	2.24396	0	0.345254
Q7CVU7	cpo Atu4778	Non-heme chloroperoxidase	DSM only	0	0.365071
Q7CVU8	Atu4780	Uncharacterized protein	0.195961	1	0.0102842
Q7CVV2	afuA Atu4784	ABC transporter, substrate binding protein (Iron)	DSM only	0	0.18396
Q7CVW6	Atu4799	dTDP-4-dehydrorhamnose 3,5-epimerase (EC 5.1.3.13) (Thymidine diphospho-4-keto-rhamnose 3,5-epimerase)	DRM only	0	0.42265
Q7CVZ0	Atu4824	Transcriptional regulator, IclR family	0.0738131	0	0.240514
Q7CVZ3	Atu4827	ABC transporter, membrane spanning protein	DRM only	0	0.0693689
Q7CVZ6	cga Atu4833	Glucan 1,4-alpha-glucosidase (EC 3.2.1.3)	0.112852	0	0.216345
Q7CW03	Atu4840	Uncharacterized protein	0.0908725	0	0.192718
Q7CW05	Atu4842	ABC transporter, substrate binding protein (Sugar)	DRM only	0	0.193421
Q7CW06	Atu4843	ABC transporter, nucleotide binding/ATPase protein (Sugar)	6.02696	0	0.21065
Q7CW11	deoC Atu4848	2-deoxy-D-ribose 5-phosphate aldolase (EC 4.1.2.4)	1.14636	0	0.617558
Q7CW12	Atu4849	NADP-dependent aldehyde dehydrogenase	0.460845	0	0.0969523
Q7CW16	Atu4853	Uncharacterized protein	DRM only	0	0.237794
Q7CW18	traA Atu4855	Conjugation protein	1.80933	0	0.350911
Q7CW19	Atu4856	Nucleotidyltransferase	0.0628592	0	0.311631
Q7CW23	Atu4860	HEPN domain-containing protein	DSM only	0	0.285899
Q7CW43	Atu4880	Transcriptional regulator, AraC family	DSM only	0	0.196334
Q7CW46	Atu4884	RHH_1 domain-containing protein	DSM only	0	0.657866
Q7CW51	Atu4892	Site-specific DNA-methyltransferase (adenine-specific) (EC 2.1.1.72)	DRM only	0	0.320765
Q7CW53	tnp Atu4894	Transposase	DRM only	0	0.138792
Q7CW61	parB1 Atu2828	Chromosome Partitioning Protein	0.539772	0	0.168899
Q7CW62	sun Atu2825	Sun protein	1.69671	0	0.119457
Q7CW67	rbsB Atu2817	ABC transporter, substrate binding protein (Ribose)	DSM only	0	0.471524
Q7CW81	cobG Atu2803	Cobalamin biosynthesis associated protein	0.640305	0	0.632599
Q7CW86	cobL Atu2798	Precorrin-6y methyltransferase	DRM only	0	0.29512
Q7CW97	obg Atu2781 AGR_C_5047	GTPase Obg (EC 3.6.5.-) (GTP-binding protein Obg)	1.53712	0	0.0763446
Q7CW98	rsfS Atu2777	Ribosomal silencing factor RsfS	DSM only	1	0.0492228
Q7CW99	Atu2775	Peptidase_M23 domain-containing protein	0.526315	0	0.515087
Q7CWA0	Atu2774	Carboxy-terminal protease	1.37472	0	0.343302
Q7CWA3	bfr Atu2771	Bacterioferritin (EC 1.16.3.1)	0.033585	1	0.0261483
Q7CWA6	Atu2768	Uncharacterized protein	1.86362	0	0.0926819
Q7CWB0	Atu2764	YkuD domain-containing protein	DSM only	1	0.0492228
Q7CWB7	tesB Atu2756	Acyl-CoA thioesterase II	DRM only	0	0.742089
Q7CWC6	Atu2746	Uncharacterized protein	0.211937	1	0.0137867
Q7CWC9	Atu2742	Uncharacterized protein	DRM only	0	0.184884
Q7CWD9	chvB Atu2730	Beta (1-->2) glucan biosynthesis protein	4.77249	0	0.0765527
Q7CWF2	thiB Atu2714	Thiamine-binding periplasmic protein	20.9486	1	0.0496733
Q7CWF5	Atu2710	Peptidase_M48 domain-containing protein	17.725	1	0.0168637
Q7CWF6	Atu2708	MFS permease	DRM only	1	0.037641
Q7CWG2	ffh Atu2697	Signal recognition particle protein (Fifty-four homolog)	1.74406	1	0.028222
Q7CWG4	Atu2696	Lactamase_B domain-containing protein	6.41977	0	0.0795387
Q7CWG5	Atu2694	MTTase N-terminal domain-containing protein	DRM only	0	0.572208
Q7CWH9	ligT Atu2678	RNA 2',3'-cyclic phosphodiesterase (RNA 2',3'-CPDase) (EC 3.1.4.58)	DSM only	0	0.201296
Q7CWI2	Atu2672	Uncharacterized protein	0.649698	0	0.118398
Q7CWI9	dcp Atu2664	Peptidyl-dipeptidase	0.617654	0	0.513963
Q7CWJ5	Atu2656	HemY_N domain-containing protein	2.81307	1	0.0319667
Q7CWJ6	Atu2655	Uncharacterized protein	3.27592	0	0.0769099
Q7CWK7	mdh Atu2639 AGR_C_4782	Malate dehydrogenase (EC 1.1.1.37)	0.291821	0	0.099321
Q7CWL8	atpH Atu2625 AGR_C_4759	ATP synthase subunit delta (ATP synthase F(1) sector subunit delta) (F-type ATPase subunit delta) (F-ATPase subunit delta)	0.23207	1	0.00260323
Q7CWM3	cheW Atu2617	Chemotaxis protein	DSM only	0	0.886361
Q7CWM4	Atu2616	Uncharacterized protein	11.9581	0	0.239545
Q7CWM5	Atu2615	POTRA domain-containing protein	DRM only	1	0.0177657
Q7CWM8	Atu2611	acidPPc domain-containing protein	DRM only	0	0.206432
Q7CWN9	Atu2598	Transcriptional regulator, RpiR family	DSM only	0	0.286315
Q7CWP6	redB Atu2591	Glucosyltransferase	2.44688	1	0.0457319
Q7CWP7	Atu2590	Glyco_tran_28_C domain-containing protein	2.83526	0	0.143288
Q7CWP9	Atu2588	ABC transporter, membrane spanning protein (Oligopeptide)	DRM only	0	0.135288
Q7CWQ0	Atu2587	ABC transporter, substrate binding protein (Oligopeptide)	DSM only	0	0.0776119
Q7CWQ2	Atu2585	Uncharacterized protein	DSM only	0	0.0893653
Q7CWQ8	Atu2578	cAMP-dependent protein kinase regulatory subunit	0.795873	0	0.585927
Q7CWS2	modA Atu2561	ABC transporter, substrate binding protein (Molybdate)	0.286156	1	0.02735
Q7CWS9	nodT Atu2552	Nodulation protein T	4.11877	0	0.088037
Q7CWT1	Atu2550	RND multidrug efflux membrane permease	9.17948	1	0.0286728
Q7CWU0	Atu2534	Outer membrane protein	DRM only	0	0.237794
Q7CWV1	telA Atu2523	Protelomerase	DRM only	0	0.22556
Q7CWV4	Atu2519	Dipeptidase	1.33078	0	0.742042
Q7CWX7	mtbA Atu2492	MFS permease	12.4643	0	0.115951
Q7CWX8	asd Atu2490	Aspartate-semialdehyde dehydrogenase (ASA dehydrogenase) (ASADH) (EC 1.2.1.11) (Aspartate-beta-semialdehyde dehydrogenase)	1.24835	0	0.383819
Q7CWY3	Atu2485	Endo/exonuclease/phosphatase domain-containing protein	7.53174	0	0.0864359
Q7CX21	Atu2439	Uncharacterized protein	10.7938	1	0.00483433
Q7CX31	pssB cysQ Atu2428	3'(2'),5'-bisphosphate nucleotidase CysQ (EC 3.1.3.7) (3'(2'),5-bisphosphonucleoside 3'(2')-phosphohydrolase) (3'-phosphoadenosine 5'-phosphate phosphatase) (PAP phosphatase)	DSM only	0	0.196334
Q7CX34	Atu2425	ABC transporter, nucleotide binding/ATPase protein	1.97693	0	0.136173
Q7CX36	Atu2422	ABC transporter, substrate binding protein (Amino acid)	0.51904	0	0.261406
Q7CX43	Atu2414	ABC transporter, substrate binding protein (Urea/amide)	DRM only	0	0.759947
Q7CX46	Atu2411	ABC transporter, nucleotide binding/ATPase protein (Urea/amide)	DSM only	0	0.194231
Q7CX48	Atu2409	Uncharacterized protein	3.13328	0	0.364515
Q7CX61	Atu2392	HlyD family secretion protein	0.0761769	1	0.0171365
Q7CX67	dht Atu2386	Dihydropyrimidinase	DRM only	0	0.183504
Q7CX75	Atu2377	Succinoglycan biosynthesis transport protein	32.2585	1	0.0290112
Q7CX76	Atu2375	UDP-hexose transferase	8.57067	0	0.0958821
Q7CX89	mcpA Atu2360	Methyl-accepting chemotaxis protein	0.487032	0	0.345457
Q7CX96	gbpR Atu2350	Transcriptional regulator, LysR family	DRM only	0	0.288025
Q7CXB2	Atu2332	Histidine kinase (EC 2.7.13.3)	DRM only	0	0.151871
Q7CXC2	Atu2321	D-alanyl-D-alanine carboxypeptidase (Penicillin binding protein)	DRM only	0	0.237794
Q7CXD3	xdhB Atu2310	Xanthine dehydrogenase C-terminal subunit	DSM only	0	0.182992
Q7CXD9	sbmA Atu2304	Bacteroid development protein	DRM only	1	0.00509585
Q7CXE6	kdgK Atu2296	2-dehydro-3-deoxygluconokinase	DSM only	1	0.0292883
Q7CXE9	Atu2293	Uncharacterized protein	1.16987	0	0.818713
Q7CXG0	Atu2281	ABC transporter, substrate binding protein (Proline/glycine betaine)	1.04039	0	0.798206
Q7CXG1	Atu2280	ABC transporter, membrane spanning protein (Proline/glycine betaine)	DRM only	1	0.022752
Q7CXH2	sigD Atu2268	ECF family sigma factor	3.85157	0	0.0757368
Q7CXH8	Atu2260	Acetyltransferase	DSM only	0	0.42414
Q7CXI0	Atu2258	Acetyltransferase Atu2258 (EC 2.3.1.-) (GCN5-related N-acetyltransferase) (GNAT)	DRM only	0	0.0766072
Q7CXI2	Atu2254	DUF58 domain-containing protein	1.82916	0	0.376275
Q7CXI6	papS Atu2250	Poly(A) polymerase	2.23894	0	0.216411
Q7CXJ0	Atu2245	Na+/Pi-cotransporter	DRM only	0	0.06029
Q7CXJ3	Atu2242	ABC transporter, nucleotide binding/ATPase protein	DRM only	0	0.155889
Q7CXJ4	Atu2241	ABC transporter, nucleotide binding/ATPase protein	DRM only	0	0.0660238
Q7CXJ6	fbcF Atu2239	Ubiquinol-cytochrome c reductase iron-sulfur subunit (EC 7.1.1.8)	2.15866	1	0.0346172
Q7CXJ8	fbcC Atu2237	Cytochrome c1	9.51739	0	0.0840973
Q7CXK1	ychF Atu2233	Ribosome-binding ATPase YchF	2.69589	0	0.183384
Q7CXK8	aldA Atu2224	Aldehyde dehydrogenase	0.44297	0	0.274455
Q7CXK9	mcpA Atu2223	Methyl-accepting chemotaxis protein	DSM only	0	0.168513
Q7CXL0	Atu2222	Dolichol-phosphate mannosyltransferase	3.73021	0	0.203835
Q7CXL2	Atu2220	PMT_2 domain-containing protein	DRM only	0	0.0563337
Q7CXL3	Atu2217	Uncharacterized protein	4.26008	0	0.0570425
Q7CXL8	proC Atu2209	Pyrroline-5-carboxylate reductase (P5C reductase) (P5CR) (EC 1.5.1.2) (PCA reductase)	DRM only	0	0.256824
Q7CXM1	petR Atu2206	Two component response regulator	0.404144	0	0.118141
Q7CXM3	Atu2203	SH3b domain-containing protein	DSM only	0	0.18396
Q7CXP1	Atu2181	Elp3 domain-containing protein	0.676267	0	0.522856
Q7CXP7	Atu2174	Uncharacterized protein	DRM only	0	0.213858
Q7CXP8	mcpA Atu2173	Methyl-accepting chemotaxis protein	DRM only	0	0.43096
Q7CXQ8	Atu2160	Uncharacterized protein	6.80876	1	0.0439776
Q7CXQ9	omp Atu2159	Outer membrane protein	DRM only	1	0.027097
Q7CXR1	Atu2156	Uncharacterized protein	0.924145	0	0.915753
Q7CXR2	metH Atu2155	Methionine synthase (EC 2.1.1.13) (5-methyltetrahydrofolate--homocysteine methyltransferase)	2.27116	1	0.0459445
Q7CXS4	Atu2143	ABC transporter, membrane spanning protein (Amino acid)	DRM only	0	0.161953
Q7CXS9	Atu2138	Dehydrogenase	0.964294	0	0.93048
Q7CXT9	iivG Atu2128	Acetolactate synthase large subunit	DSM only	0	0.235483
Q7CXU0	caiB Atu2127	L-carnitine dehydratase	DRM only	1	0.0487617
Q7CXU1	Atu2126	Hydrolase_4 domain-containing protein	5.41821	0	0.154983
Q7CXV0	pfp Atu2115	Pyrophosphate--fructose 6-phosphate 1-phosphotransferase (EC 2.7.1.90) (6-phosphofructokinase, pyrophosphate dependent) (PPi-dependent phosphofructokinase) (PPi-PFK) (Pyrophosphate-dependent 6-phosphofructose-1-kinase)	3.9164	1	0.0341064
Q7CXV1	djlA Atu2114	Molecular chaperone, DnaJ family	6.30911	1	0.00750892
Q7CXV3	slt Atu2112	Soluble lytic transglycosylase	DRM only	0	0.42265
Q7CXV4	solA Atu2111	Sarcosine oxidase	DRM only	0	0.624133
Q7CXV5	solA Atu2110	Sarcosine oxidase	DSM only	0	0.201189
Q7CXW1	Atu2101	Uncharacterized protein	3.32043	0	0.328143
Q7CXX0	bamD Atu2084	Outer membrane protein assembly factor BamD	6.49584	1	0.0144424
Q7CXY6	Atu2064	Uncharacterized protein	0.209137	0	0.192361
Q7CXZ1	betI Atu2059	HTH-type transcriptional regulator BetI	DRM only	0	0.339394
Q7CXZ2	Atu2058	Uncharacterized protein	DRM only	0	0.183876
Q7CXZ3	pcrA Atu2057	DNA helicase (EC 3.6.4.12)	1.18007	0	0.631013
Q7CXZ5	Atu2055	HlyD family secretion protein	DRM only	0	0.0574302
Q7CXZ7	Atu2053	FAD dependent oxidoreductase	0.277819	0	0.355329
Q7CY01	hflK Atu2045	Protein HflK	2.46453	1	0.0347377
Q7CY03	Atu2043	Periplasmic serine endoprotease DegP-like (EC 3.4.21.107)	0.525784	0	0.302175
Q7CY07	Atu2038	DUF87 domain-containing protein	DSM only	0	0.478594
Q7CY08	ilvI Atu2036	Acetolactate synthase (EC 2.2.1.6)	DRM only	0	0.302213
Q7CY15	Atu2029	Uncharacterized protein	DRM only	0	0.42265
Q7CY17	Atu2026	Exodeoxyribonuclease V	0.574564	0	0.616085
Q7CY18	Atu2025	Transcriptional regulator	DRM only	0	0.60623
Q7CY19	ndh Atu2023	NADH dehydrogenase	5.31407	1	0.00654484
Q7CY20	adh Atu2022	NADP-dependent alcohol dehydrogenase	1.14474	0	0.667045
Q7CY31	Atu2010	GGDEF family protein	2.26031	0	0.228488
Q7CY37	uvrB Atu2001	UvrABC system protein B (Protein UvrB) (Excinuclease ABC subunit B)	1.77556	0	0.272648
Q7CY41	cysJ Atu1997	Sulfite reductase	DSM only	0	0.423443
Q7CY44	Atu1993	tRNA/rRNA metyltransferase	0.325701	1	0.041686
Q7CY45	Atu1990	Bacteriophytochrome protein	0.998358	0	0.997763
Q7CY47	Atu1988	Two component sensor kinase	DRM only	0	0.172368
Q7CY49	Atu1986	Histidine kinase (EC 2.7.13.3)	5.19688	0	0.0777086
Q7CY51	fsrR Atu1984	Two component sensor kinase	DRM only	0	0.137222
Q7CY52	Atu1983	Uncharacterized protein	DRM only	0	0.130714
Q7CY53	sigK Atu1982	Sigma factor	DRM only	0	0.0590411
Q7CY61	Atu1973	Uncharacterized protein	DRM only	0	0.38153
Q7CY63	Atu1971	Uncharacterized protein	DSM only	1	0.00477188
Q7CY65	Atu1967	Uncharacterized protein	DRM only	0	0.070985
Q7CY67	secE Atu1962	Protein translocase subunit SecE	DRM only	0	0.0959347
Q7CY83	prlA secY Atu1927	Protein translocase subunit SecY	4.23029	1	0.0332648
Q7CY88	Atu1915	Periplasmic serine endoprotease DegP-like (EC 3.4.21.107)	1.54351	0	0.07723
Q7CY91	mclA Atu1912	Methyl-accepting chemotaxis protein	DRM only	0	0.572687
Q7CY97	Atu1904	Transcriptional regulator	11.2972	1	0.0435669
Q7CYA2	rbsB Atu1899	ABC transporter, substrate binding protein (Ribose)	DSM only	0	0.423443
Q7CYA9	exoI Atu1887	Succinoglycan biosynthesis protein	DRM only	0	0.42265
Q7CYB9	psuG Atu1876	Pseudouridine-5'-phosphate glycosidase (PsiMP glycosidase) (EC 4.2.1.70)	0.428608	0	0.269959
Q7CYC5	lasT trmJ Atu1868	tRNA (cytidine/uridine-2'-O-)-methyltransferase TrmJ (EC 2.1.1.200) (tRNA (cytidine(32)/uridine(32)-2'-O)-methyltransferase) (tRNA Cm32/Um32 methyltransferase)	5.61307	1	0.000891427
Q7CYD3	Atu1857	Inositol monophosphatase family protein	DRM only	0	0.122513
Q7CYE5	Atu1842	Uncharacterized protein	DSM only	0	0.70924
Q7CYE9	Atu1838	ABC transporter, substrate binding protein (Amino acid)	DSM only	0	0.737365
Q7CYG1	sufB Atu1824	ABC transporter subunit	DSM only	0	0.513586
Q7CYG3	sufD Atu1822	Transport system	1.98027	0	0.133204
Q7CYG4	nifS Atu1821	Cysteine desulfurase (EC 2.8.1.7) (Nitrogenase metalloclusters biosynthesis protein NifS)	DRM only	0	0.949438
Q7CYG7	Atu1817	Uncharacterized protein	DRM only	0	0.150244
Q7CYG9	Atu1815	HlyD family secretion protein	4.12394	1	0.0033449
Q7CYH4	Atu1804	Uncharacterized protein	0.400986	0	0.21215
Q7CYI1	ccdA Atu1796	Cytochrome c-type biogenesis protein	DRM only	0	0.186912
Q7CYI8	Atu1789	Lipoprotein	0.508006	1	0.00936407
Q7CYI9	Atu1788	Transcriptional regulator, GntR family	5.42875	1	0.0221995
Q7CYJ6	recG Atu1780	ATP-dependent DNA helicase RecG (EC 3.6.4.12)	DRM only	0	0.266071
Q7CYK3	Atu1773	Uncharacterized protein	0.173039	1	0.0262894
Q7CYK6	glnB Atu1769	Nitrogen regulatory protein P-II	0.128348	0	0.136418
Q7CYK7	nnrE nnrD Atu1768	Bifunctional NAD(P)H-hydrate repair enzyme (Nicotinamide nucleotide repair protein) [Includes: ADP-dependent (S)-NAD(P)H-hydrate dehydratase (EC 4.2.1.136) (ADP-dependent NAD(P)HX dehydratase); NAD(P)H-hydrate epimerase (EC 5.1.99.6)]	DSM only	0	0.17306
Q7CYK8	Atu1767	Transcriptional regulator, AraC family	DRM only	0	0.42265
Q7CYL0	Atu1765	Transcriptional regulator, LysR family	1.86693	0	0.279117
Q7CYL2	Atu1763	Formyl_trans_N domain-containing protein	DRM only	0	0.118689
Q7CYM0	Atu1751	PNPLA domain-containing protein	0.616115	0	0.29077
Q7CYM8	Atu1739	Permease	DRM only	0	0.255335
Q7CYM9	Atu1738	ABC transporter, nucleotide binding/ATPase protein	DRM only	0	0.336673
Q7CYN5	Atu1729	Putative molybdenum cofactor biosynthesis protein	0.33184	0	0.351865
Q7CYP2	fadL Atu1717	Long-chain fatty acid transport protein	DRM only	0	0.0508763
Q7CYP7	Atu1710	SPOR domain-containing protein	2.55058	0	0.413324
Q7CYQ2	pcm Atu1701	L-isoaspartyl protein carboxyl methyltransferase (Protein L-isoaspartyl methyltransferase) (Protein-L-isoaspartate O-methyltransferase) (Protein-beta-aspartate methyltransferase)	1.69801	0	0.683085
Q7CYQ3	Atu1700	Lipoprotein	0.804475	0	0.605753
Q7CYT6	Atu1647	ABC transporter, membrane spanning protein	5.30129	0	0.210278
Q7CYT7	Atu1646	ABC transporter, nucleotide binding/ATPase protein	DRM only	0	0.10819
Q7CYV5	secG Atu1619	Protein-export membrane protein SecG	DRM only	1	0.0397814
Q7CYW3	phbC Atu1604	Poly-beta-hydroxybutyrate synthase	2.09372	0	0.409636
Q7CYX4	Atu1589	Aminotransferase (EC 2.6.1.-)	2.03651	0	0.0639828
Q7CYX5	hom Atu1588	Homoserine dehydrogenase (EC 1.1.1.3)	0.435632	0	0.460352
Q7CYY5	cysE Atu1571	Serine acetyltransferase (EC 2.3.1.30)	7.57961	1	0.0435104
Q7CYY9	fdhA Atu1567	Glutathione-independent formaldehyde dehydrogenase	DSM only	0	0.243068
Q7CYZ1	Atu1564	DUF815 domain-containing protein	4.20559	0	0.162858
Q7CYZ3	secD secF Atu1562	Multifunctional fusion protein [Includes: Protein translocase subunit SecD; Protein-export membrane protein SecF]	9.91635	1	0.00941116
Q7CYZ6	Atu1559	Uncharacterized protein	DRM only	0	0.186461
Q7CZ03	mgtE Atu1547	Magnesium transporter MgtE	DRM only	1	0.00634588
Q7CZ06	Atu1544	Uncharacterized protein	DRM only	0	0.180101
Q7CZ11	fixN Atu1537	Cytochrome-c oxidase (EC 7.1.1.9)	DRM only	0	0.118263
Q7CZ22	Atu1524	Aldo_ket_red domain-containing protein	DSM only	0	0.239379
Q7CZ23	manA Atu1523	Beta-mannosidase	0.244331	0	0.269172
Q7CZ24	Atu1522	Transcriptional regulator, LacI family	DRM only	0	0.0691134
Q7CZ25	znuA Atu1521	High-affinity zinc uptake system protein ZnuA	7.62017	1	0.00727838
Q7CZ29	Atu1517	Uncharacterized protein	DRM only	0	0.42265
Q7CZ32	Atu1514	Uncharacterized protein	0.349307	0	0.0622281
Q7CZ37	gyrA Atu1507	DNA gyrase subunit A (EC 5.6.2.2)	0.782232	0	0.781826
Q7CZ41	Atu1501	Uncharacterized protein	0.223043	1	0.0278866
Q7CZ43	dac Atu1499	Serine-type D-Ala-D-Ala carboxypeptidase (EC 3.4.16.4)	DSM only	0	0.184206
Q7CZ44	holB Atu1497	DNA polymerase III, delta prime subunit	DRM only	0	0.277445
Q7CZ51	arsH Atu1489	Arsenical resistance protein	DSM only	0	0.106607
Q7CZ66	rluC Atu1471	Pseudouridine synthase (EC 5.4.99.-)	0.40684	0	0.127931
Q7CZ75	Atu1457	Uncharacterized protein	DSM only	0	0.789926
Q7CZ79	Atu1453	CMP/dCMP-type deaminase domain-containing protein	DRM only	0	0.42265
Q7CZ80	mazG Atu1452	Uncharacterized protein	0.425418	0	0.165808
Q7CZ83	ntrY Atu1447	Nitrogen regulation protein (EC 2.7.13.3)	29.9437	0	0.0541895
Q7CZ91	Atu1438	Transcriptional regulator, AraC family	DRM only	0	0.42265
Q7CZ96	aceF Atu1432	Dihydrolipoamide acetyltransferase	0.400223	1	0.0150272
Q7CZ97	Atu1431	Uncharacterized protein	0.159517	1	0.00182899
Q7CZ99	pdhA Atu1429	Pyruvate dehydrogenase E1 component subunit alpha (EC 1.2.4.1)	0.948579	0	0.725977
Q7CZA0	Atu1428	Uncharacterized protein	0.765699	0	0.79216
Q7CZA3	Atu1421	Amidohydro-rel domain-containing protein	DRM only	0	0.342728
Q7CZA8	Atu1416	Long-chain-fatty-acid-CoA-ligase	DSM only	0	0.970677
Q7CZE0	Atu1373	Uncharacterized protein	DSM only	1	0.0453883
Q7CZE6	Atu1367	Transcriptional regulator, LysR family	1.78178	0	0.461118
Q7CZE9	Atu1362	Histidine kinase (EC 2.7.13.3)	2.02541	0	0.126689
Q7CZF1	Atu1360	Uncharacterized protein	0.622422	0	0.355972
Q7CZF4	Atu1357	Uncharacterized protein	27.2744	1	0.0192346
Q7CZH1	rne Atu1339	Ribonuclease E (RNase E) (EC 3.1.26.12)	0.90704	0	0.881746
Q7CZH7	Atu1333	Outer membrane protein	2.06416	0	0.291921
Q7CZI5	Atu1322	Acetyltransferase	DRM only	0	0.191626
Q7CZK1	Atu1293	Uncharacterized protein	DRM only	0	0.199248
Q7CZK7	Atu1285	Metal dependent hydrolase	0.48181	0	0.0762939
Q7CZK9	nuoN Atu1283	NADH-quinone oxidoreductase subunit N (EC 7.1.1.-) (NADH dehydrogenase I subunit N) (NDH-1 subunit N)	DRM only	1	0.0113601
Q7CZL6	nuoG Atu1276	NADH-quinone oxidoreductase (EC 7.1.1.-)	0.333901	1	0.0114849
Q7CZN9	ctaA cox15 Atu1242 AGR_C_2290	Heme A synthase (HAS) (EC 1.3.-.-) (Cytochrome aa3-controlling protein)	DRM only	0	0.114426
Q7CZP4	Atu1237	Glycosyl transferase	5.25036	0	0.21113
Q7CZP5	Atu1236	Polysaccharide biosynthesis glycosyltransferase	DRM only	0	0.127689
Q7CZP8	Atu1232	Uncharacterized protein	2.87662	0	0.0963896
Q7CZP9	Atu1227	Uncharacterized protein	DRM only	0	0.191777
Q7CZQ0	exoD Atu1226	ExoD protein	DRM only	0	0.151449
Q7CZQ3	Atu1220	Methylated-DNA--[protein]-cysteine S-methyltransferase (EC 2.1.1.63)	3.83975	0	0.0684524
Q7CZQ9	Atu1214	DNA-binding protein	DRM only	0	0.42265
Q7CZR0	Atu1213	Uncharacterized protein	DRM only	0	0.406408
Q7CZR5	Atu1206	Uncharacterized protein	2.37933	0	0.11545
Q7CZR6	ilvA Atu1205	L-threonine dehydratase (EC 4.3.1.19) (Threonine deaminase)	4.12224	0	0.159359
Q7CZT4	Atu1181	HTH merR-type domain-containing protein	0.370363	1	0.0385783
Q7CZT5	Atu1177	Uncharacterized protein	DSM only	0	0.620604
Q7CZT6	Atu1176	Uncharacterized protein	1.21052	0	0.860258
Q7CZT7	Atu1175	SmpA_OmlA domain-containing protein	11.4133	0	0.0840751
Q7CZV4	rnd Atu1151	Ribonuclease D (RNase D) (EC 3.1.13.5)	0.639583	0	0.663958
Q7CZV6	cya Atu1149	Adenylate cyclase	DRM only	0	0.213858
Q7CZW1	ppk Atu1144	Polyphosphate kinase (EC 2.7.4.1) (ATP-polyphosphate phosphotransferase) (Polyphosphoric acid kinase)	0.405015	0	0.32322
Q7CZW8	rlmJ Atu1135	Ribosomal RNA large subunit methyltransferase J (EC 2.1.1.266) (23S rRNA (adenine(2030)-N6)-methyltransferase) (23S rRNA m6A2030 methyltransferase)	0.378765	0	0.179086
Q7CZX0	rns Atu1133	Ribonuclease	DRM only	0	0.244581
Q7CZY2	Atu1118	ABC transporter, nucleotide binding/ATPase protein	DRM only	0	0.0691134
Q7CZY5	Atu1115	Histidine kinase (EC 2.7.13.3)	1.25461	0	0.80849
Q7CZY8	Atu1112	GGDEF domain-containing protein	DRM only	0	0.293392
Q7CZZ6	mltG Atu1099	Endolytic murein transglycosylase (EC 4.2.2.-) (Peptidoglycan polymerization terminase)	13.2643	1	0.030489
Q7CZZ8	fabF Atu1097	3-oxoacyl-[acyl-carrier-protein] synthase 2 (EC 2.3.1.179)	DSM only	0	0.25125
Q7D001	Atu1093	Aldo/keto reductase	DSM only	0	0.143651
Q7D003	Atu1087	Secretion protein	9.18667	0	0.0515768
Q7D019	Atu1064	ABC transporter, nucleotide binding/ATPase protein	DRM only	0	0.094322
Q7D020	pssA Atu1062	CDP-diacylglycerol--serine O-phosphatidyltransferase (EC 2.7.8.8) (Phosphatidylserine synthase)	DRM only	1	0.0376885
Q7D021	Atu1060	Two component response regulator	DRM only	0	0.256824
Q7D028	Atu1052	Uncharacterized protein	1.28382	0	0.591834
Q7D038	Atu1042	MOSC domain-containing protein	4.73393	0	0.278226
Q7D045	Atu1030	GTP pyrophosphokinase rsh	2.14504	0	0.343953
Q7D046	Atu1028	NYN domain-containing protein	0.552917	0	0.0836839
Q7D048	Atu1022	Soluble lytic transglycosylase	DRM only	0	0.110694
Q7D054	hisC Atu1011	Histidinol-phosphate aminotransferase	1.14139	0	0.882657
Q7D066	Atu0995	Uncharacterized protein	0.806708	0	0.709335
Q7D071	Atu0990	NAD/NADP dependent oxidoreductase	DSM only	0	0.172852
Q7D073	Atu0988	Molecular chaperone, Hsp70 family	DRM only	0	0.079787
Q7D087	lipA Atu0972	LipA protein	17.1918	0	0.0583267
Q7D089	Atu0970	Two component response regulator	0.163094	1	0.0105663
Q7D0A3	Atu0951	Large terminase phage packaging protein	1.33372	0	0.759462
Q7D0A9	Atu0943	Uncharacterized protein	DRM only	0	0.253638
Q7D0F5	Atu0891	Cation efflux system protein	DRM only	1	0.00158371
Q7D0F7	Atu0888	Transcriptional regulator, MerR family	DRM only	0	0.479971
Q7D0H1	mcpC Atu0872	Methyl-accepting chemotaxis protein	DRM only	0	0.275945
Q7D0H5	Atu0867	Aldo/keto reductase	DSM only	0	0.18396
Q7D0J6	Atu0845	YkuD domain-containing protein	2.34741	1	0.00992258
Q7D0J8	Atu0843	P type cation (Metal) transporter, ATPase component	1.45044	0	0.715304
Q7D0J9	Atu0842	Uncharacterized protein	DRM only	0	0.098276
Q7D0M5	Atu0804	Proton/glutamate transport protein	3.93336	1	0.0353497
Q7D0M6	ppdK Atu0803	Pyruvate, phosphate dikinase (EC 2.7.9.1)	4.96963	0	0.41334
Q7D0M8	smc Atu0801	Chromosome partition protein Smc	1.37277	0	0.668874
Q7D0N2	Atu0796	Putative peptidase	DRM only	0	0.740328
Q7D0P0	Atu0786	Peptidase, family M16	DSM only	0	0.35017
Q7D0Q4	coxB Atu0767	Cytochrome c oxidase subunit 2 (EC 7.1.1.9)	5.89158	0	0.130455
Q7D0Q6	tldD Atu0765	TldD	1.19124	0	0.83247
Q7D0R3	dnaJ Atu0758	Molecular chaperone, DnaJ family	DRM only	0	0.212429
Q7D0R6	aroC Atu0754 AGR_C_1368	Chorismate synthase (CS) (EC 4.2.3.5) (5-enolpyruvylshikimate-3-phosphate phospholyase)	DSM only	1	0.0240573
Q7D0R9	Atu0751	ABC transporter, nucleotide binding/ATPase protein (Cobalt)	DRM only	0	0.362508
Q7D0T0	mcpG Atu0738	Chemotaxis methyl-accepting protein	DRM only	0	0.237794
Q7D0T7	Atu0730	Lectin-like protein BA14k	1.64277	0	0.314977
Q7D0U4	Atu0722	Uncharacterized protein	DRM only	0	0.269869
Q7D0U5	Atu0721	Elp3 domain-containing protein	1.23152	0	0.832504
Q7D0U7	Atu0718	Putative_PNPOx domain-containing protein	DRM only	0	0.911062
Q7D0U9	atpF2 atpG Atu0716 AGR_C_1299	ATP synthase subunit b 2 (ATP synthase F(0) sector subunit b 2) (ATPase subunit I 2) (F-type ATPase subunit b 2) (F-ATPase subunit b 2)	5.04073	0	0.057668
Q7D0V3	Atu0712	Hydrolase_2 domain-containing protein	1.50305	0	0.573322
Q7D0V6	Atu0709	Iron-sulfur cluster carrier protein	2.97748	0	0.258034
Q7D0V9	kdgR Atu0706	Transcriptional regulator, IclR family	DRM only	0	0.335706
Q7D0W1	dgoK Atu0704	2-dehydro-3-deoxygalactonate kinase	DSM only	0	0.381498
Q7D0X0	Atu0693	PmbA/TldD related protein	1.01594	0	0.983008
Q7D0X2	Atu0691	PNPLA domain-containing protein	DRM only	0	0.889297
Q7D0X6	Atu0687	Uncharacterized protein	16.1043	0	0.108615
Q7D0Y9	tag Atu0670	3-methyladenine-DNA glycosylase	DSM only	0	0.608098
Q7D0Z0	Atu0669	YkuD domain-containing protein	0.482725	0	0.403169
Q7D0Z3	glcE Atu0666	Glycolate oxidase subunit	1.59456	0	0.409546
Q7D102	Atu0657	Ribosomal RNA small subunit methyltransferase E (EC 2.1.1.193)	0.426334	0	0.0849871
Q7D105	Atu0653	Uncharacterized protein	4.66622	0	0.0743156
Q7D110	Atu0648	S1 motif domain-containing protein	0.461738	0	0.117321
Q7D111	mcpA Atu0646	Methyl-accepting chemotaxis protein A	1.88943	0	0.686998
Q7D114	Atu0643	Uncharacterized protein	1.99853	1	0.0415614
Q7D117	Atu0640	Uncharacterized protein	1.03605	0	0.951458
Q7D119	sohB Atu0637	Proteinase sohB	0.30026	0	0.124507
Q7D122	ispB Atu0634	Octaprenyl-diphosphate synthase	6.54806	0	0.249372
Q7D123	Atu0633	Uncharacterized protein	0.251045	1	0.00792628
Q7D130	guaB Atu0624	Inosine-5'-monophosphate dehydrogenase (IMP dehydrogenase) (IMPD) (IMPDH) (EC 1.1.1.205)	0.799093	0	0.424646
Q7D131	Atu0622	Metallo-beta-lactamase superfamily protein	DRM only	0	0.207335
Q7D134	Atu0619	Exopolyphosphatase	0.918508	0	0.833665
Q7D135	Atu0614	Histidine kinase (EC 2.7.13.3)	DRM only	0	0.590388
Q7D145	Atu0603	Uncharacterized protein	DSM only	1	0.0157687
Q7D146	glnA Atu0602	Glutamine synthetase	2.54507	0	0.143112
Q7D148	zwf Atu0600	Glucose-6-phosphate 1-dehydrogenase (G6PD) (EC 1.1.1.49)	0.449308	0	0.114456
Q7D149	pgl Atu0599	6-phosphogluconolactonase (6PGL) (EC 3.1.1.31)	0.478826	1	0.00522805
Q7D155	aglF Atu0592	ABC transporter, membrane spanning protein	DRM only	0	0.889297
Q7D165	flhA Atu0581	Flagellar biosynthesis protein FlhA	DRM only	0	0.22556
Q7D179	flaD Atu0567	Flagellin	0.959286	0	0.7701
Q7D185	Atu0549	Uncharacterized protein	DRM only	0	0.606167
Q7D186	fliL Atu0547	Flagellar protein FliL	DRM only	0	0.42265
Q7D1A0	agrR Atu0525	Transcriptional regulator, LuxR family	DRM only	0	0.363863
Q7D1A6	cheR Atu0518	Chemotaxis protein methyltransferase (EC 2.1.1.80)	DRM only	0	0.184919
Q7D1B0	Atu0514	Methyl-accepting chemotaxis protein	0.496953	0	0.451505
Q7D1B3	phaD Atu0510	pH adaption potassium efflux system protein	DRM only	1	0.0430742
Q7D1B4	phaE Atu0509	PhaE protein	DRM only	0	0.213858
Q7D1B8	Atu0504	Uncharacterized protein	DRM only	1	0.00666155
Q7D1C3	Atu0499	PG_binding_1 domain-containing protein	0.602911	0	0.63001
Q7D1D3	Atu0488	Uncharacterized protein	DRM only	0	0.28229
Q7D1E1	Atu0479	ABC transporter, substrate binding protein (Amino acid)	DSM only	0	0.278825
Q7D1E2	Atu0478	Glycosyltransferase	2.08574	0	0.614362
Q7D1E5	Atu0475	Uncharacterized protein	DRM only	0	0.0627247
Q7D1E6	Atu0474	Putative RNA polymerase sigma-70 factor	DRM only	1	0.0145632
Q7D1F2	Atu0462	Endolysin	DRM only	0	0.142259
Q7D1H9	Atu0419	Histidine kinase (EC 2.7.13.3)	DRM only	0	0.177519
Q7D1I3	Atu0410	Transcriptional regulator, AraC family	DRM only	0	0.42265
Q7D1I4	Atu0409	Ferrichrome iron receptor	DRM only	0	0.657756
Q7D1J1	scrK Atu0401	Fructokinase	DRM only	0	0.270331
Q7D1J3	Atu0397	Uncharacterized protein	24.1677	1	0.0139724
Q7D1J4	Atu0396	Coenzyme A transferase	DRM only	0	0.199269
Q7D1J9	Atu0391	ABC transporter, nucleotide binding/ATPase protein	DSM only	0	0.423443
Q7D1K6	Atu0377	Uncharacterized protein	0.283095	0	0.11765
Q7D1L1	Atu0372	AMP nucleosidase (EC 3.2.2.4)	0.206241	1	0.0171108
Q7D1L8	Atu0361	Transcriptional regulator	0.264952	0	0.0576962
Q7D1M0	Atu0359	Hemolysin	0.158909	1	0.0123968
Q7D1M1	phoH Atu0357	Phosphate starvation inducible protein	0.291853	1	0.0211353
Q7D1M2	miaB Atu0356 AGR_C_623	tRNA-2-methylthio-N(6)-dimethylallyladenosine synthase (EC 2.8.4.3) ((Dimethylallyl)adenosine tRNA methylthiotransferase MiaB) (tRNA-i(6)A37 methylthiotransferase)	DRM only	0	0.228463
Q7D1M9	mviN murJ Atu0347	Probable lipid II flippase MurJ	DRM only	0	0.328806
Q7D1N2	barA Atu0343	Histidine kinase (EC 2.7.13.3)	DRM only	0	0.458776
Q7D1N4	trmH Atu0341	rRNA methylase	0.688311	0	0.627681
Q7D1N8	Atu0335	Uncharacterized protein	3.97995	0	0.0602843
Q7D1N9	Atu0334	OstA-like_N domain-containing protein	0.758801	0	0.32551
Q7D1P1	hpf Atu0331	Ribosome hibernation promoting factor (HPF)	0.843875	0	0.762543
Q7D1P3	hemN Atu0325	Heme chaperone HemW	DRM only	0	0.287364
Q7D1P4	fadB Atu0322	Enoyl CoA hydratase	DSM only	0	0.103542
Q7D1P8	dfp coaBC Atu0316	Coenzyme A biosynthesis bifunctional protein CoaBC (DNA/pantothenate metabolism flavoprotein) (Phosphopantothenoylcysteine synthetase/decarboxylase) (PPCS-PPCDC) [Includes: Phosphopantothenoylcysteine decarboxylase (PPC decarboxylase) (PPC-DC) (EC 4.1.1.36) (CoaC); Phosphopantothenate--cysteine ligase (EC 6.3.2.5) (CoaB) (Phosphopantothenoylcysteine synthetase) (PPC synthetase) (PPC-S)]	0.218241	0	0.0768512
Q7D1Q9	rsmI Atu0302	Ribosomal RNA small subunit methyltransferase I (EC 2.1.1.198) (16S rRNA 2'-O-ribose C1402 methyltransferase) (rRNA (cytidine-2'-O-)-methyltransferase RsmI)	0.68644	0	0.733028
Q7D1R0	dnaN Atu0301	Beta sliding clamp	DSM only	1	0.0405298
Q7D1R4	Atu0296	NADH-ubiquinone oxidoreductase	2.73135	0	0.059868
Q7D1S0	Atu0288	Peptidase_M75 domain-containing protein	DRM only	0	0.727396
Q7D1T6	Atu0270	Mandelate racemase / muconate lactonizing enzyme family protein	DSM only	0	0.187406
Q7D1T9	Atu0266	Oxidoreductase	DRM only	0	0.527574
Q7D1U5	Atu0257	Uncharacterized protein	7.48349	1	0.0287087
Q7D1U7	Atu0253	AB hydrolase-1 domain-containing protein	DRM only	0	0.237794
Q7D1W5	Atu0233	Lysozyme	0.594175	0	0.297199
Q7D1X6	ctpF Atu0219	Components of type IV pilus	DRM only	1	0.0430291
Q7D1X7	ctpG Atu0218	Component of type IV pilus	1.96082	0	0.21516
Q7D1Y4	Atu0210	HTH marR-type domain-containing protein	DSM only	0	0.0776125
Q7D1Z0	Atu0203	Peptidase_M48 domain-containing protein	DRM only	0	0.213858
Q7D1Z7	Atu0196	ABC transporter, membrane spanning protein (Proline/glycine/betaine)	DRM only	0	0.0540163
Q7D200	glnA Atu0193	Glutamine synthetase	DRM only	0	0.889297
Q7D203	Atu0189	ABC transporter, membrane spanning protein (Peptide)	DRM only	0	0.0799211
Q7D213	phnL Atu0176	ABC transporter, nucleotide binding/ATPase protein (Phosphonate)	DSM only	0	0.190419
Q7D219	Atu0170	Uncharacterized protein	DRM only	0	0.324411
Q7D228	Atu0159	ABC transporter, nucleotide binding/ATPase protein	6.5659	1	0.00539307
Q7D235	fabA Atu0151 AGR_C_246	3-hydroxydecanoyl-[acyl-carrier-protein] dehydratase (EC 4.2.1.59) (3-hydroxyacyl-[acyl-carrier-protein] dehydratase FabA) (Beta-hydroxydecanoyl thioester dehydrase) (Trans-2-decenoyl-[acyl-carrier-protein] isomerase) (EC 5.3.3.14)	DSM only	0	0.09289
Q7D236	fabB Atu0150	3-oxoacyl-(Acyl-carrier-protein) synthase	0.6309	0	0.370471
Q7D237	fabI Atu0149	Enoyl-[acyl-carrier-protein] reductase [NADH] (EC 1.3.1.9)	0.306631	1	0.00994576
Q7D240	gltB Atu0145	Glutamate synthase large subunit	DRM only	0	0.250807
Q7D242	cyoA Atu0142	Ubiquinol oxidase subunit 2	4.24211	0	0.105151
Q7D245	cyoD Atu0139	Cytochrome bo(3) ubiquinol oxidase subunit 4 (Cytochrome o ubiquinol oxidase subunit 4) (Oxidase bo(3) subunit 4) (Ubiquinol oxidase polypeptide IV) (Ubiquinol oxidase subunit 4)	12.4218	0	0.173533
Q7D246	surf Atu0138	SURF1-like protein	DRM only	1	0.016153
Q7D253	Atu0127	ABC transporter, nucleotide binding/ATPase protein (Sugar/ribonucleotide)	DRM only	1	0.0456885
Q7D255	msrA Atu0125 AGR_C_197	Peptide methionine sulfoxide reductase MsrA (Protein-methionine-S-oxide reductase) (EC 1.8.4.11) (Peptide-methionine (S)-S-oxide reductase) (Peptide Met(O) reductase)	0.32458	1	0.0321738
Q7D261	dctD Atu0114	Two component response regulator	5.22042	0	0.0895392
Q7D262	Atu0113	C4-dicarboxylate transport sensor protein (EC 2.7.13.3)	DSM only	0	0.303116
Q7D266	Atu0108	Putative metalloprotease M20 family	1.21325	0	0.72408
Q7D268	cspA Atu0106	Cold shock protein	DSM only	0	0.215855
Q7D273	pheA Atu0099	Prephenate dehydratase (EC 4.2.1.51)	1.02269	0	0.985532
Q7D284	rsmC Atu0081	Ribosomal RNA small subunit methyltransferase	0.386531	0	0.0589097
Q7D290	moeB Atu0074	Molybdopterin biosynthesis protein	DRM only	0	0.0997485
Q7D292	nrdF Atu0071	Ribonucleoside-diphosphate reductase subunit beta (EC 1.17.4.1)	6.58078	0	0.183849
Q7D293	nrdE Atu0070	Ribonucleoside-diphosphate reductase (EC 1.17.4.1)	1.74511	0	0.143972
Q7D2A3	hrpB Atu0052	Helicase	DRM only	0	0.130801
Q7D2A4	actS Atu0051	Histidine kinase (EC 2.7.13.3)	DRM only	1	0.0346842
Q7D2B0	chvI Atu0034	Two component response regulator	0.580135	0	0.145302
Q7D2B8	uvrD Atu0023	DNA helicase (EC 3.6.4.12)	0.387942	0	0.213901
Q7D2B9	trxA Atu0022	Thioredoxin	DSM only	0	0.666951
Q7D2D0	Atu0008	Tim44 domain-containing protein	32.8887	1	0.0419949
Q7D2E6	Atu6147	Uncharacterized protein	1.72451	0	0.377759
Q7D2E9	accF Atu6144	Agrocinopine phosphodiesterase	DRM only	0	0.40548
Q7D2G8	ycf Atu6116	Uncharacterized protein	DRM only	0	0.190008
Q7D2L0	dfpD Atu6074	ABC transporter, nucleotide binding/ATPase protein (Peptide)	DRM only	0	0.42265
Q7D2T8	Atu5539	HlyD family secretion protein	0.91493	0	0.919227
Q7D2U1	Atu5536	Amidohydrolase	DRM only	0	0.628975
Q7D2U9	Atu5528	Blue-light-activated histidine kinase	2.3911	0	0.157749
Q7D2W6	Atu5509	Histidine kinase (EC 2.7.13.3)	2.78926	0	0.103404
Q7D2W7	gst Atu5508	Glutathione S-transferase	2.13999	0	0.146469
Q7D2W8	ggt Atu5507	Gamma-glutamyltranspeptidase	DRM only	1	0.0346774
Q7D2Y4	catE Atu5491	Catalase (EC 1.11.1.6)	0.177201	0	0.350596
Q7D2Y9	Atu5483	Transcriptional regulator, GntR family	0.654139	0	0.556891
Q7D306	Atu5464	Transcriptional regulator, IclR family/regucalcin	DRM only	0	0.572208
Q7D316	attH Atu5454	CrtC domain-containing protein	DRM only	0	0.42265
Q7D317	attG Atu5453	ABC transporter, membrane spanning protein	DRM only	0	0.216465
Q7D323	Atu5447	Zinc-binding oxidoreductase	DRM only	1	0.037419
Q7D327	Atu5443	Transcriptional regulator, TetR family	DRM only	0	0.0866022
Q7D343	nahD Atu5425	2-hydroxychromene-2-carboxylate isomerase (EC 5.99.1.4)	DRM only	0	0.42265
Q7D375	Atu5390	Transcriptional regulator, AraC family	DRM only	0	0.237794
Q7D376	Atu5389	Non-heme haloperoxidase	DRM only	0	0.737783
Q7D386	Atu5375	Blue-light-activated histidine kinase	DRM only	0	0.184884
Q7D3A4	tnp Atu5352	Transposase and inactivated derivatives, TnpA family	DSM only	0	0.201189
Q7D3A9	Atu5347	ABC transporter, nucleotide binding/ATPase protein (Oligopeptide)	DRM only	0	0.343305
Q7D3B9	Atu5335	Dehydrogenase	DSM only	0	0.196334
Q7D3C1	Atu5333	2-hydroxyacid dehydrogenase	DRM only	0	0.616434
Q7D3I1	Atu5258	Beta-lactamase domain-containing protein	DSM only	0	0.18396
Q7D3J6	Atu5243	Transcriptional regulator, DeoR family	DRM only	0	0.213858
Q7D3N1	Atu5206	Transcriptional regulator, LysR family	DSM only	0	0.504201
Q7D3Q0	Atu5187	Transcriptional regulator, LysR family	DRM only	0	0.335473
Q7D3R3	avhB10 Atu5171	Type IV secretion protein AvhB10	DRM only	0	0.330409
Q7D3R4	avhB9 Atu5170	Type IV secretion protein AvhB9	4.56473	0	0.190694
Q7D3R5	avhB8 Atu5169	Type IV secretion system protein virB8	2.17276	0	0.302817
Q7D3R9	avhB4 Atu5165	Type IV secretion system protein virB4	DRM only	0	0.742055
Q7D3S4	atsE Atu5159	Uncharacterized protein	DSM only	0	0.265003
Q7D3V8	Atu5117	HEPN domain-containing protein	0.237845	0	0.199415
Q7D3W2	traA Atu5111	Conjugal transfer protein	0.488179	0	0.524539
Q7D3W9	Atu5102	Uncharacterized protein	DRM only	0	0.616434
Q7D3X6	tnpA Atu5094	ISL3 family transposase	DRM only	0	0.944007
Q7D3X8	rcdB Atu5091	Curdlan synthesis protein	10.0293	1	0.0108794
Q7D3Y0	Atu5089	Uncharacterized protein	DRM only	1	0.0333247
Q7D3Y2	Atu5086	Uncharacterized protein	1.46565	0	0.547372
Q7D3Z4	Atu5072	Sialidase domain-containing protein	DSM only	0	0.201189
Q7D403	Atu5063	Transcriptional regulator, RpiR family	DSM only	0	0.201189
Q7D410	Atu5055	3'-phosphoesterase (EC 6.5.1.1) (DNA repair polymerase) (NHEJ DNA polymerase) (Polydeoxyribonucleotide synthase [ATP]) (Polymerase/primase)	DRM only	0	0.211699
Q7D419	Atu5044	Uncharacterized protein	DRM only	0	0.184884
Q7D427	Atu5033	Uncharacterized protein	0.933533	0	0.903721
Q7D429	Atu5031	Mrr_cat domain-containing protein	DRM only	0	0.937647
Q7D433	Atu5023	Uncharacterized protein	DSM only	0	0.42414
Q7D438	Atu5018	Uncharacterized protein	DRM only	0	0.22556
Q7D446	socR Atu5007	Santhopine-responsive transcriptional repressor	DRM only	0	0.183504
Q8U4U5	Atu8183	Uncharacterized protein	DRM only	0	0.0685538
Q8U4V1	celG Atu8186	Cellulose synthesis protein	3.41622	0	0.0570905
Q8U4V2	Atu8187	Uncharacterized protein	DRM only	0	0.0882589
Q8U4V3	Atu3319	Uncharacterized protein	DRM only	0	0.937647
Q8U4V9	Atu8188	Acetyltransf_6 domain-containing protein	DRM only	0	0.236709
Q8U4W3	Atu8189	Uncharacterized protein	DSM only	1	0.032984
Q8U4W5	Atu8095	Uncharacterized protein	24.8059	1	0.0123469
Q8U4W9	Atu3658	Transcriptional regulator, MerR family	DRM only	0	0.994307
Q8U4X1	Atu8191	Uncharacterized protein	0.467473	0	0.102457
Q8U4X2	Atu8192	Uncharacterized protein	0.373647	0	0.240147
Q8U4X3	Atu3761	Uncharacterized protein	DSM only	0	0.44734
Q8U4X8	Atu3920	Uncharacterized protein	DRM only	0	0.184884
Q8U4Y6	Atu8037	Uncharacterized protein	DSM only	1	0.0336509
Q8U4Y7	Atu8196	Uncharacterized protein	DRM only	0	0.42265
Q8U502	Atu4613	Glycosyltransferase	7.58671	1	0.0471251
Q8U507	Atu8200	Uncharacterized protein	0.354136	0	0.436139
Q8U511	Atu8097	Pectate_lyase_3 domain-containing protein	DSM only	0	0.341654
Q8U529	Atu8182	Uncharacterized protein	0.262717	1	0.00682147
Q8U531	Atu2640	Uncharacterized protein	1.42268	0	0.558052
Q8U533	Atu2629	Uncharacterized protein	DRM only	0	0.949438
Q8U537	Atu8179	Uncharacterized protein	12.4916	0	0.144513
Q8U542	Atu8177	Uncharacterized protein	DRM only	0	0.10384
Q8U544	ureD Atu2408 AGR_C_4369	Urease accessory protein UreD	1.65424	0	0.543534
Q8U549	Atu2283	Pseudoazurin	DSM only	1	0.019105
Q8U553	Atu8175	Putative transmembrane protein, RNA-binding region RNP-1 (RNA recognition motif)	DRM only	1	0.0417818
Q8U554	Atu8174	acidPPc domain-containing protein	DSM only	0	0.642486
Q8U555	Atu8173	Uncharacterized protein	0.746014	0	0.655417
Q8U559	chvD ettA Atu2125	Energy-dependent translational throttle protein EttA (EC 3.6.1.-) (Translational regulatory factor EttA)	4.81915	0	0.0592806
Q8U561	Atu8171	Uncharacterized protein	0.901849	0	0.651787
Q8U562	Atu8170	Uncharacterized protein	0.162306	1	0.000342551
Q8U573	Atu8167	Putative transmembrane protein	5.29193	0	0.121614
Q8U575	Atu8022	Uncharacterized protein	DRM only	0	0.213858
Q8U593	Atu8112	Uncharacterized protein	DRM only	0	0.256656
Q8U599	Atu1632	Dimethylglycine dehydrogenase	0.569218	0	0.679299
Q8U5A0	Atu8160	DUF2059 domain-containing protein	0.139653	0	0.0650988
Q8U5A1	Atu8159	Uncharacterized protein	18.7347	0	0.163173
Q8U5A7	Atu8090	Uncharacterized protein	DRM only	0	0.703618
Q8U5B2	hflx hflX Atu1451	GTPase HflX (GTP-binding protein HflX)	DRM only	0	0.821741
Q8U5D8	ribD* Atu8148	5-amino-6-(5-phosphoribosylamino)uracil reductase (EC 1.1.1.193) (EC 3.5.4.26) (Diaminohydroxyphosphoribosylaminopyrimidine deaminase) (HTP reductase) (Riboflavin biosynthesis protein RibD) (Riboflavin-specific deaminase)	DSM only	0	0.434317
Q8U5E3	cvpA Atu1076	Colicin V production protein	8.51572	0	0.223736
Q8U5E4	Atu1074	NAD/NADP dependent oxidoreductase	1.0739	0	0.251186
Q8U5E6	Atu8147	LysM domain-containing protein	5.71031	1	0.0242173
Q8U5F3	Atu8146	Uncharacterized protein	3.4254	0	0.131992
Q8U5F8	amn Atu1006	AMP nucleosidase (EC 3.2.2.4)	2.1436	0	0.46546
Q8U5I3	Atu8136	Uncharacterized protein	DRM only	0	0.184884
Q8U5I4	coxA Atu0768	Cytochrome c oxidase subunit 1 (EC 7.1.1.9)	DRM only	0	0.092971
Q8U5J1	Atu8134	Uncharacterized protein	DRM only	1	0.00431157
Q8U5J7	phaA Atu8131	pH adaption potassium efflux system protein	DRM only	1	0.0443564
Q8U5K0	Atu8130	Uncharacterized protein	DRM only	0	0.201975
Q8U5K1	Atu8129	SCP domain-containing protein	DRM only	0	0.28229
Q8U5K5	Atu8127	Uncharacterized protein	DRM only	0	0.42265
Q8U5K9	Atu8083	Uncharacterized protein	DSM only	0	0.501441
Q8U5L5	Atu8123	Uncharacterized protein	DSM only	0	0.483053
Q8U5L9	Atu8122	Uncharacterized protein	DSM only	0	0.196334
Q8U5M0	Atu8121	Uncharacterized protein	11.7695	1	0.0162888
Q8U5N2	Atu0260	Aldo-keto reductase	DRM only	0	0.447785
Q8U642	dnaE2-3 Atu6093 AGR_pTi_175	Error-prone DNA polymerase 3 (EC 2.7.7.7)	DRM only	0	0.0837314
Q8U675	Atu6060	Nitrilotriacetate monooxygenase	DRM only	0	0.184884
Q8U6T2	Atu4724 AGR_L_317	UPF0337 protein Atu4724	DRM only	0	0.42265
Q8U705	argH2 Atu4651 AGR_L_463	Argininosuccinate lyase 2 (ASAL 2) (EC 4.3.2.1) (Arginosuccinase)	0.105361	0	0.233336
Q8U7F8	trhO Atu4491 AGR_L_756	tRNA uridine(34) hydroxylase (EC 1.14.-.-) (tRNA hydroxylation protein O)	DSM only	0	0.218642
Q8U7G2	metN Atu4487 AGR_L_765	Methionine import ATP-binding protein MetN (EC 7.4.2.11)	1.07901	0	0.800057
Q8U7G6	xylA Atu4483 AGR_L_774	Xylose isomerase (EC 5.3.1.5)	DSM only	0	0.146855
Q8U7H5	gltX Atu4474 AGR_L_791	Glutamate--tRNA ligase (EC 6.1.1.17) (Glutamyl-tRNA synthetase) (GluRS)	0.390721	1	0.04383
Q8U7H6	lysS Atu4473 AGR_L_794	Lysine--tRNA ligase (EC 6.1.1.6) (Lysyl-tRNA synthetase) (LysRS)	5.47732	0	0.253134
Q8U7I5	tal talB Atu4464 AGR_L_812	Transaldolase (EC 2.2.1.2)	DSM only	1	0.00728243
Q8U7P1	napA Atu4408 AGR_L_917	Periplasmic nitrate reductase (EC 1.9.6.1)	31.1212	0	0.253468
Q8U7Y1	Atu4318 AGR_L_1091	Putative D-xylulose reductase (EC 1.1.1.9) (Xylitol dehydrogenase) (XDH)	DSM only	0	0.307138
Q8U8B8	prfA Atu4174 AGR_L_1353	Peptide chain release factor 1 (RF-1)	DSM only	0	0.196334
Q8U8D6	ssuB1 Atu4156 AGR_L_1395	Aliphatic sulfonates import ATP-binding protein SsuB 1 (EC 7.6.2.14)	DRM only	0	0.764707
Q8U8I2	sdh Atu4110 AGR_L_1487	Serine 3-dehydrogenase (EC 1.1.1.276)	1.29589	0	0.552424
Q8U8J3	nadA Atu4098 AGR_L_1511	Quinolinate synthase A (EC 2.5.1.72)	DRM only	0	0.150053
Q8U8L4	glgB Atu4077 AGR_L_1558	1,4-alpha-glucan branching enzyme GlgB (EC 2.4.1.18) (1,4-alpha-D-glucan:1,4-alpha-D-glucan 6-glucosyl-transferase) (Alpha-(1->4)-glucan branching enzyme) (Glycogen branching enzyme) (BE)	DRM only	0	0.949438
Q8U8L5	glgC Atu4076 AGR_L_1560	Glucose-1-phosphate adenylyltransferase (EC 2.7.7.27) (ADP-glucose pyrophosphorylase) (ADPGlc PPase) (ADP-glucose synthase)	DRM only	0	0.309008
Q8U8M6	rpsU1 Atu4064 AGR_L_1581	30S ribosomal protein S21 A	0.39732	1	0.0407808
Q8U8T9	bioD Atu3999 AGR_L_1705	ATP-dependent dethiobiotin synthetase BioD (EC 6.3.3.3) (DTB synthetase) (DTBS) (Dethiobiotin synthase)	DRM only	0	0.42265
Q8U8Z7	hutH Atu3933 AGR_L_1825	Histidine ammonia-lyase (Histidase) (EC 4.3.1.3)	0.826616	0	0.873587
Q8U919	Atu3911 AGR_L_1868	Putative hydro-lyase Atu3911 (EC 4.2.1.-)	DRM only	0	0.0764613
Q8U949	rbsA2 Atu3880 AGR_L_1931	Ribose import ATP-binding protein RbsA 2 (EC 7.5.2.7)	0.345516	0	0.339202
Q8U987	Atu3841	Uncharacterized protein	DSM only	0	0.423443
Q8U9B0	Atu3818 AGR_L_2027	Putative ribose/galactose/methyl galactoside import ATP-binding protein 3 (EC 7.5.2.11) (EC 7.5.2.7)	DRM only	0	0.46455
Q8U9D9	kdpB Atu3789 AGR_L_2090	Potassium-transporting ATPase ATP-binding subunit (EC 7.2.2.6) (ATP phosphohydrolase [potassium-transporting] B chain) (Potassium-binding and translocating subunit B) (Potassium-translocating ATPase B chain)	DSM only	0	0.234205
Q8U9F7	hemH Atu3771 AGR_L_2129	Ferrochelatase (EC 4.99.1.1) (Heme synthase) (Protoheme ferro-lyase)	DRM only	1	0.00392599
Q8U9F9	omp10 Atu3769 AGR_L_2135	Outer membrane lipoprotein omp10 homolog	DRM only	0	0.0845363
Q8U9I5	rpmE Atu3743 AGR_L_2181	50S ribosomal protein L31	0.418467	0	0.244574
Q8U9I9	pgk Atu3739 AGR_L_2193	Phosphoglycerate kinase (EC 2.7.2.3)	DSM only	0	0.516694
Q8U9K5	ruvA Atu3723 AGR_L_2223	Holliday junction ATP-dependent DNA helicase RuvA (EC 3.6.4.12)	DSM only	0	0.768703
Q8U9K6	ruvB Atu3722 AGR_L_2225	Holliday junction ATP-dependent DNA helicase RuvB (EC 3.6.4.12)	1.71172	0	0.248801
Q8U9L4	tolB Atu3714 AGR_L_2244	Tol-Pal system protein TolB	0.601231	1	0.0419935
Q8U9L5	pal omp16 palA Atu3713 AGR_L_2246	Peptidoglycan-associated lipoprotein (PAL) (Outer membrane lipoprotein Omp16 homolog)	18.8286	0	0.21418
Q8U9L9	glmM Atu3709 AGR_L_2256	Phosphoglucosamine mutase (EC 5.4.2.10)	DRM only	0	0.186368
Q8U9N0	Atu3696	UPF0434 protein Atu3696	DSM only	0	0.127836
Q8U9T8	rpsU3 Atu3637 AGR_L_2379	30S ribosomal protein S21 3	0.405326	0	0.0850904
Q8U9U5	accA Atu3630 AGR_L_2394	Acetyl-coenzyme A carboxylase carboxyl transferase subunit alpha (ACCase subunit alpha) (Acetyl-CoA carboxylase carboxyltransferase subunit alpha) (EC 2.1.3.15)	1.7766	0	0.113038
Q8U9V8	rpmB Atu3617 AGR_L_2417.1	50S ribosomal protein L28	1.28494	0	0.447707
Q8U9W1	gloB Atu3614 AGR_L_2423	Hydroxyacylglutathione hydrolase (EC 3.1.2.6) (Glyoxalase II) (Glx II)	DRM only	0	0.0656253
Q8U9W3	hisC Atu3612 AGR_L_2426	Histidinol-phosphate aminotransferase (EC 2.6.1.9) (Imidazole acetol-phosphate transaminase)	1.29226	0	0.703422
Q8U9X6	argH1 Atu3599 AGR_L_2457	Argininosuccinate lyase 1 (ASAL 1) (EC 4.3.2.1) (Arginosuccinase)	0.224019	0	0.186931
Q8UA38	Atu3537	Uncharacterized protein	DSM only	0	0.18396
Q8UA56	argJ Atu3518 AGR_L_2624	Arginine biosynthesis bifunctional protein ArgJ [Cleaved into: Arginine biosynthesis bifunctional protein ArgJ alpha chain; Arginine biosynthesis bifunctional protein ArgJ beta chain] [Includes: Glutamate N-acetyltransferase (EC 2.3.1.35) (Ornithine acetyltransferase) (OATase) (Ornithine transacetylase); Amino-acid acetyltransferase (EC 2.3.1.1) (N-acetylglutamate synthase) (AGSase)]	0.408577	0	0.0903418
Q8UA66	ubiG Atu3508 AGR_L_2640	Ubiquinone biosynthesis O-methyltransferase (2-polyprenyl-6-hydroxyphenol methylase) (EC 2.1.1.222) (3-demethylubiquinone 3-O-methyltransferase) (EC 2.1.1.64)	DRM only	0	0.0511123
Q8UA73	cysA2 Atu3501 AGR_L_2655	Sulfate/thiosulfate import ATP-binding protein CysA 2 (EC 7.3.2.3) (Sulfate-transporting ATPase 2)	2.05222	0	0.203029
Q8UA86	rbsA1 Atu3488 AGR_L_2683	Ribose import ATP-binding protein RbsA 1 (EC 7.5.2.7)	0.327339	0	0.465674
Q8UAA9	blh Atu3465 AGR_L_2726	Beta-lactamase hydrolase-like protein (BLH) (EC 3.-.-.-)	DRM only	0	0.0576706
Q8UAK2	Atu3371 AGR_L_2903	Putative ribose/galactose/methyl galactoside import ATP-binding protein 2 (EC 7.5.2.11) (EC 7.5.2.7)	DRM only	0	0.177386
Q8UAW0	uxuA1 Atu3257 AGR_L_3119	Mannonate dehydratase 1 (EC 4.2.1.8) (D-mannonate hydro-lyase 1)	DRM only	0	0.184884
Q8UAW8	minC Atu3249 AGR_L_3131	Probable septum site-determining protein MinC	1.47251	0	0.53945
Q8UAY9	dnaE2-1 Atu3228 AGR_L_3173	Error-prone DNA polymerase 1 (EC 2.7.7.7)	1.40792	0	0.68674
Q8UB29	ugpC3 Atu3188 AGR_L_3244	sn-glycerol-3-phosphate import ATP-binding protein UgpC 3 (EC 7.6.2.10)	1.82753	1	0.0225144
Q8UB30	ugpE Atu3187 AGR_L_3246	sn-glycerol-3-phosphate transport system permease protein UgpE	DRM only	0	0.190225
Q8UB32	ugpB Atu3185 AGR_L_3248	sn-glycerol-3-phosphate-binding periplasmic protein UgpB	4.43215	0	0.0534208
Q8UB93	rpsU2 Atu3123 AGR_L_3374	30S ribosomal protein S21 2	0.424103	0	0.204664
Q8UBL6	hemE Atu2835 AGR_C_5140	Uroporphyrinogen decarboxylase (UPD) (URO-D) (EC 4.1.1.37)	3.21469	1	0.0207972
Q8UBM0	mnmG gidA Atu2831 AGR_C_5134	tRNA uridine 5-carboxymethylaminomethyl modification enzyme MnmG (Glucose-inhibited division protein A)	DRM only	0	0.189269
Q8UBM1	rsmG Atu2830 AGR_C_5132	Ribosomal RNA small subunit methyltransferase G (EC 2.1.1.170) (16S rRNA 7-methylguanosine methyltransferase) (16S rRNA m7G methyltransferase)	DRM only	0	0.165229
Q8UBM5	htpX Atu2826 AGR_C_5123	Protease HtpX homolog (EC 3.4.24.-)	DRM only	1	0.0099901
Q8UBM8	purH Atu2823 AGR_C_5117	Bifunctional purine biosynthesis protein PurH [Includes: Phosphoribosylaminoimidazolecarboxamide formyltransferase (EC 2.1.2.3) (AICAR transformylase); IMP cyclohydrolase (EC 3.5.4.10) (ATIC) (IMP synthase) (Inosinicase)]	3.15949	1	0.00209399
Q8UBP3	cobQ cbiP Atu2808 AGR_C_5093	Cobyric acid synthase	1.06257	0	0.962779
Q8UBR5	rplU Atu2785 AGR_C_5054	50S ribosomal protein L21	0.236799	1	0.0464325
Q8UBR6	rpmA Atu2784 AGR_C_5052	50S ribosomal protein L27	2.21047	0	0.303624
Q8UBS0	proB Atu2780 AGR_C_5045	Glutamate 5-kinase (EC 2.7.2.11) (Gamma-glutamyl kinase) (GK)	DSM only	0	0.724624
Q8UBS1	proA Atu2779 AGR_C_5042	Gamma-glutamyl phosphate reductase (GPR) (EC 1.2.1.41) (Glutamate-5-semialdehyde dehydrogenase) (Glutamyl-gamma-semialdehyde dehydrogenase) (GSA dehydrogenase)	5.5944	0	0.058028
Q8UBS2	nadD Atu2778 AGR_C_5040	Probable nicotinate-nucleotide adenylyltransferase (EC 2.7.7.18) (Deamido-NAD(+) diphosphorylase) (Deamido-NAD(+) pyrophosphorylase) (Nicotinate mononucleotide adenylyltransferase) (NaMN adenylyltransferase)	DSM only	0	0.0859205
Q8UBV2	leuS Atu2748 AGR_C_4985	Leucine--tRNA ligase (EC 6.1.1.4) (Leucyl-tRNA synthetase) (LeuRS)	1.25592	0	0.75091
Q8UBV5	acsA acs Atu2745 AGR_C_4980	Acetyl-coenzyme A synthetase (AcCoA synthetase) (Acs) (EC 6.2.1.1) (Acetate--CoA ligase) (Acyl-activating enzyme)	0.425466	1	0.00175192
Q8UBX8	mtgA Atu2720 AGR_C_4930	Biosynthetic peptidoglycan transglycosylase (EC 2.4.1.129) (Glycan polymerase) (Peptidoglycan glycosyltransferase MtgA) (PGT)	DRM only	0	0.184884
Q8UBY6	thiQ Atu2712 AGR_C_4916	Thiamine import ATP-binding protein ThiQ (EC 7.6.2.15)	DRM only	0	0.118333
Q8UBY9	leuC Atu2709 AGR_C_4910	3-isopropylmalate dehydratase large subunit (EC 4.2.1.33) (Alpha-IPM isomerase) (IPMI) (Isopropylmalate isomerase)	DRM only	0	0.664348
Q8UBZ5	rplS Atu2703 AGR_C_4900	50S ribosomal protein L19	0.413287	1	0.0238795
Q8UBZ8	rimM Atu2700 AGR_C_4896	Ribosome maturation factor RimM	DSM only	0	0.196334
Q8UBZ9	rpsP Atu2699 AGR_C_4893	30S ribosomal protein S16	0.144544	0	0.076799
Q8UC06	Atu2692 AGR_C_4880.1	Probable intracellular septation protein A	DRM only	0	0.338465
Q8UC12	ccmA Atu2686 AGR_C_4868	Cytochrome c biogenesis ATP-binding export protein CcmA (EC 7.6.2.5) (Heme exporter protein A)	DRM only	0	0.236709
Q8UC31	argG Atu2667 AGR_C_4836	Argininosuccinate synthase (EC 6.3.4.5) (Citrulline--aspartate ligase)	1.42632	0	0.110794
Q8UC37	ppa Atu2661 AGR_C_4822	Inorganic pyrophosphatase (EC 3.6.1.1) (Pyrophosphate phospho-hydrolase) (PPase)	2.25395	0	0.0835822
Q8UC47	tsaD gcp Atu2651 AGR_C_4806	tRNA N6-adenosine threonylcarbamoyltransferase (EC 2.3.1.234) (N6-L-threonylcarbamoyladenine synthase) (t(6)A synthase) (t(6)A37 threonylcarbamoyladenosine biosynthesis protein TsaD) (tRNA threonylcarbamoyladenosine biosynthesis protein TsaD)	DRM only	0	0.0897817
Q8UC57	omp19 Atu2641 AGR_C_4789	Outer membrane lipoprotein omp19 homolog	2.58064	0	0.0816018
Q8UC60	sucC Atu2638 AGR_C_4780	Succinate--CoA ligase [ADP-forming] subunit beta (EC 6.2.1.5) (Succinyl-CoA synthetase subunit beta) (SCS-beta)	1.2763	0	0.385948
Q8UC74	atpA Atu2624 AGR_C_4757	ATP synthase subunit alpha (EC 7.1.2.2) (ATP synthase F1 sector subunit alpha) (F-ATPase subunit alpha)	0.230448	1	0.0180396
Q8UC75	atpG Atu2623 AGR_C_4756	ATP synthase gamma chain (ATP synthase F1 sector gamma subunit) (F-ATPase gamma subunit)	0.264489	1	0.0246797
Q8UC76	atpD Atu2622 AGR_C_4754	ATP synthase subunit beta (EC 7.1.2.2) (ATP synthase F1 sector subunit beta) (F-ATPase subunit beta)	0.170452	1	0.0017106
Q8UC77	atpC Atu2621 AGR_C_4751	ATP synthase epsilon chain (ATP synthase F1 sector epsilon subunit) (F-ATPase epsilon subunit)	0.586252	0	0.410127
Q8UCC9	thiC Atu2569 AGR_C_4656	Phosphomethylpyrimidine synthase (EC 4.1.99.17) (Hydroxymethylpyrimidine phosphate synthase) (HMP-P synthase) (HMP-phosphate synthase) (HMPP synthase) (Thiamine biosynthesis protein ThiC)	0.574713	0	0.642141
Q8UCD5	modC Atu2563 AGR_C_4645	Molybdenum import ATP-binding protein ModC (EC 7.3.2.5)	5.36512	1	0.0226829
Q8UCK6	dps Atu2477 AGR_C_4495	DNA protection during starvation protein (EC 1.16.-.-)	DSM only	0	0.0549519
Q8UCM8	ung Atu2455 AGR_C_4459	Uracil-DNA glycosylase (UDG) (EC 3.2.2.27)	DRM only	0	0.431192
Q8UCN6	purA Atu2447 AGR_C_4442	Adenylosuccinate synthetase (AMPSase) (AdSS) (EC 6.3.4.4) (IMP--aspartate ligase)	2.28121	0	0.180266
Q8UCR8	Atu2415	Glutamine synthetase translation inhibitor	DRM only	0	0.993472
Q8UCS6	ureA Atu2407 AGR_C_4368	Urease subunit gamma (EC 3.5.1.5) (Urea amidohydrolase subunit gamma)	DSM only	0	0.585241
Q8UCT2	ureC Atu2401 AGR_C_4357	Urease subunit alpha (EC 3.5.1.5) (Urea amidohydrolase subunit alpha)	0.512808	0	0.484402
Q8UCV7	Atu2376	Uncharacterized protein	DSM only	0	0.196334
Q8UD28	der engA Atu2300 AGR_C_4180	GTPase Der (GTP-binding protein EngA)	0.80935	0	0.141533
Q8UD57	clpP3 Atu2270 AGR_C_4125	ATP-dependent Clp protease proteolytic subunit 3 (EC 3.4.21.92) (Endopeptidase Clp 3)	1.35146	0	0.6408
Q8UD63	leuA Atu2264 AGR_C_4114	2-isopropylmalate synthase (EC 2.3.3.13) (Alpha-IPM synthase) (Alpha-isopropylmalate synthase)	0.939625	0	0.919552
Q8UD97	pth Atu2230 AGR_C_4055	Peptidyl-tRNA hydrolase (PTH) (EC 3.1.1.29)	0.895225	0	0.828936
Q8UDA0	rplY ctc Atu2227 AGR_C_4048	50S ribosomal protein L25 (General stress protein CTC)	0.0823519	1	0.0166053
Q8UDA9	prs prsA Atu2218 AGR_C_4031	Ribose-phosphate pyrophosphokinase (RPPK) (EC 2.7.6.1) (5-phospho-D-ribosyl alpha-1-diphosphate) (Phosphoribosyl diphosphate synthase) (Phosphoribosyl pyrophosphate synthase) (P-Rib-PP synthase) (PRPP synthase) (PRPPase)	1.36547	0	0.122742
Q8UDB4	lgt Atu2213 AGR_C_4022	Phosphatidylglycerol--prolipoprotein diacylglyceryl transferase (EC 2.5.1.145)	DRM only	1	0.040202
Q8UDE5	greA Atu2182 AGR_C_3965	Transcription elongation factor GreA (Transcript cleavage factor GreA)	DSM only	0	0.270201
Q8UDG7	Atu2158	Uncharacterized protein	DRM only	0	0.129499
Q8UDM5	mraY Atu2097 AGR_C_3805	Phospho-N-acetylmuramoyl-pentapeptide-transferase (EC 2.7.8.13) (UDP-MurNAc-pentapeptide phosphotransferase)	DRM only	0	0.0866536
Q8UDM8	murG Atu2094 AGR_C_3798	UDP-N-acetylglucosamine--N-acetylmuramyl-(pentapeptide) pyrophosphoryl-undecaprenol N-acetylglucosamine transferase (EC 2.4.1.227) (Undecaprenyl-PP-MurNAc-pentapeptide-UDPGlcNAc GlcNAc transferase)	3.09077	1	0.0328968
Q8UDM9	murC Atu2093 AGR_C_3796	UDP-N-acetylmuramate--L-alanine ligase (EC 6.3.2.8) (UDP-N-acetylmuramoyl-L-alanine synthetase)	1.39917	0	0.559093
Q8UDP9	prmA Atu2072 AGR_C_3754	Ribosomal protein L11 methyltransferase (L11 Mtase) (EC 2.1.1.-)	2.4507	0	0.246875
Q8UDQ0	Atu2071	Uncharacterized protein	DRM only	0	0.229326
Q8UDV0	ilvC Atu2019 AGR_C_3660	Ketol-acid reductoisomerase (NADP(+)) (KARI) (EC 1.1.1.86) (Acetohydroxy-acid isomeroreductase) (AHIR) (Alpha-keto-beta-hydroxylacyl reductoisomerase) (Ketol-acid reductoisomerase type 1) (Ketol-acid reductoisomerase type I)	0.341433	0	0.148199
Q8UE04	rplK Atu1960 AGR_C_3575	50S ribosomal protein L11	0.1901	0	0.0739218
Q8UE05	rplA Atu1959 AGR_C_3573	50S ribosomal protein L1	0.485216	0	0.20617
Q8UE06	rplJ Atu1958 AGR_C_3572	50S ribosomal protein L10	0.663074	0	0.425906
Q8UE07	rplL Atu1957 AGR_C_3571	50S ribosomal protein L7/L12	0.389942	1	0.0294801
Q8UE08	rpoB Atu1956 AGR_C_3569	DNA-directed RNA polymerase subunit beta (RNAP subunit beta) (EC 2.7.7.6) (RNA polymerase subunit beta) (Transcriptase subunit beta)	2.08921	0	0.350218
Q8UE09	rpoC Atu1955 AGR_C_3568	DNA-directed RNA polymerase subunit beta' (RNAP subunit beta') (EC 2.7.7.6) (RNA polymerase subunit beta') (Transcriptase subunit beta')	1.12508	0	0.873671
Q8UE13	rpsL Atu1951 AGR_C_3561	30S ribosomal protein S12	0.416755	0	0.111756
Q8UE14	rpsG Atu1950 AGR_C_3559	30S ribosomal protein S7	0.134026	0	0.0638706
Q8UE15	fusA Atu1949 AGR_C_3558	Elongation factor G (EF-G)	1.06432	0	0.721213
Q8UE16	tufA Atu1948 AGR_C_3557; tufB Atu1966 AGR_C_3583	Elongation factor Tu (EF-Tu)	1.57632	0	0.0783952
Q8UE17	rpsJ Atu1947 AGR_C_3556	30S ribosomal protein S10	0.306083	1	0.0361617
Q8UE18	rplC Atu1946 AGR_C_3555	50S ribosomal protein L3	0.652416	0	0.113822
Q8UE19	rplD Atu1945 AGR_C_3553	50S ribosomal protein L4	0.384316	1	0.0134428
Q8UE20	rplW Atu1944 AGR_C_3552	50S ribosomal protein L23	1.64782	0	0.454877
Q8UE21	rplB Atu1943 AGR_C_3550	50S ribosomal protein L2	0.846365	0	0.683004
Q8UE22	rpsS Atu1942 AGR_C_3549	30S ribosomal protein S19	0.455873	0	0.074473
Q8UE23	rplV Atu1941 AGR_C_3548	50S ribosomal protein L22	0.45634	0	0.103958
Q8UE24	rpsC Atu1940 AGR_C_3546	30S ribosomal protein S3	1.06609	0	0.837895
[truncated: 199 more rows]

## Sheet: AB medium (+ vir)
Accession	Gene name(s)	Annotation	Ratio [DRM/DSM]	sig95%	t-test
A8WFE1	Atu8019	Uncharacterized protein	2.00131	0	0.245782
A9CEJ3	Atu3015	Uncharacterized protein	DRM only	0	0.301357
A9CEJ8	Atu3024	ABC transporter, membrane spanning protein (Sugar)	DRM only	1	0.0127637
A9CEJ9	Atu3025	Oligo alginate lyase	DSM only	1	0.0176268
A9CEK0	Atu3026	Short chain dehydrogenase	DRM only	0	0.183527
A9CEK4	Atu3032	Uncharacterized protein	0.370406	1	0.00524777
A9CEK6	Atu3038	ABC transporter, nucleotide binding/ATPase protein (Dipeptide)	DRM only	0	0.373062
A9CEL7	Atu3061	GGDEF family protein	5.5163	0	0.392655
A9CEM5	Atu3074	Short chain dehydrogenase	DRM only	0	0.0746571
A9CEM7	Atu3080	Uncharacterized protein	DRM only	0	0.183527
A9CEN4	mcpA Atu3094	Methyl-accepting chemotaxis protein	DRM only	0	0.333953
A9CEP0	Atu3103	ABC transporter, nucleotide binding/ATPase protein (Sugar)	1.47803	0	0.0768103
A9CEP2	celI Atu3105	HTH arsR-type domain-containing protein	DRM only	0	0.183527
A9CEP5	Atu3110	AP_endonuc_2 domain-containing protein	DRM only	0	0.183527
A9CEQ0	Atu3119	Uncharacterized protein	DRM only	0	0.183761
A9CEQ7	Atu3138	D-galactarolactone isomerase (GLI) (EC 5.4.1.4) (Galactaro delta-lactone isomerase)	DRM only	0	0.289279
A9CER3	Atu3147	Oxidoreductase	DRM only	0	0.154937
A9CER4	Atu3148	ABC transporter, nucleotide binding/ATPase protein (Sugar)	0.494383	0	0.444793
A9CER8	Atu3155	Transcriptional regulator, LysR family	DSM only	0	0.291864
A9CES1	mmsB Atu3159	3-hydroxyisobutyrate dehydrogenase	DRM only	0	0.22384
A9CES2	Atu3161	SAF domain-containing protein	DRM only	0	0.467241
A9CES4	Atu3164	Galactitol 2-dehydrogenase (GDH) (EC 1.1.1.16) (Sorbitol dehydrogenase) (SorbD) (EC 1.1.1.-)	DRM only	0	0.0640289
A9CES9	Atu3170	ABC transporter, nucleotide binding/ATPase protein (Sorbitol/mannitol)	1.64674	0	0.356488
A9CET4	mdeA Atu3175	Methionine gamma-lyase	DRM only	0	0.183628
A9CET7	Atu3178	ABC transporter, substrate binding protein	0.12789	0	0.0530133
A9CET8	Atu3180	ABC transporter, nucleotide binding/ATPase protein	5.41053	1	0.00583747
A9CEU0	Atu3184	CobW C-terminal domain-containing protein	DRM only	1	0.012251
A9CEU3	Atu3191	Outer membrane protein	DRM only	1	0.000311586
A9CEU6	Atu3199	ABC transporter, membrane spanning protein (Ribose)	DRM only	0	0.34784
A9CEU7	Atu3200	ABC transporter, nucleotide binding/ATPase protein (Ribose)	4.61571	1	0.0173332
A9CEU8	Atu3202	Efflux pump membrane transporter	DRM only	1	0.00888261
A9CEU9	Atu3204	GGDEF family protein	5.0194	1	0.00659428
A9CEV0	Atu3207	GGDEF family protein	DRM only	0	0.409839
A9CEV3	Atu3215	ABC transporter, nucleotide binding/ATPase protein (Oligopeptide)	DRM only	0	0.226981
A9CEV4	Atu3216	ABC transporter, nucleotide binding/ATPase protein (Oligopeptide)	DRM only	0	0.446627
A9CEV5	aspC Atu3217	Aspartate aminotransferase	DRM only	0	0.183761
A9CEV6	ilvD Atu3219	Dihydroxy-acid dehydratase	0.0570872	0	0.117895
A9CEW2	Atu3226	Transcriptional regulator, GntR family	DRM only	0	0.136257
A9CEW3	Atu3229	UmuC domain-containing protein	DRM only	0	0.22384
A9CEW4	Atu3234	NAD binding oxidoreductase	0.172289	0	0.182649
A9CEW9	Atu3244	GGDEF family protein	DRM only	0	0.230662
A9CEX2	minD Atu3248	Cell division inhibitor MinD (Septum site-determining protein MinD)	1.86733	0	0.0897863
A9CEX3	Atu3251	Haloacid dehalogenase-like hydrolase	DRM only	0	0.35018
A9CEX4	exuR Atu3252	Transcriptional regulator, GntR family	DRM only	0	0.221827
A9CEX5	Atu3253	ABC transporter, substrate binding protein	DSM only	1	0.0395902
A9CEX6	Atu3254	ABC transporter, nucleotide binding/ATPase protein (Dicarboxylate)	DRM only	1	0.0130701
A9CEX8	Atu3259	Dehydrogenase	1.77492	0	0.126626
A9CEY0	Atu3262	ABC transporter, nucleotide binding/ATPase protein	DRM only	0	0.101894
A9CEY4	Atu3274	AcrB/AcrD/AcrF family protein	DRM only	0	0.0745552
A9CEY9	Atu3282	ABC transporter, substrate binding protein (Sugar)	1.3581	0	0.597677
A9CEZ0	Atu3285	Glycosidase	0.397747	0	0.467879
A9CEZ1	Atu3286	ABC transporter, membrane spanning protein	DRM only	0	0.183527
A9CEZ3	dctD Atu3296	Two component response regulator for C4-dicarboxylate transport	DRM only	1	0.0388947
A9CEZ4	Atu3300	Aminotransferase	DRM only	0	0.454205
A9CEZ5	fixR Atu3301	Short-chain alcohol dehydrogenase	DRM only	0	0.0562395
A9CEZ7	celA Atu3309	Cellulose synthase catalytic subunit [UDP-forming] (EC 2.4.1.12)	DRM only	0	0.332861
A9CEZ8	Atu3311	Phosphomannose isomerase	DRM only	0	0.229055
A9CF05	exoF Atu3326	Exopolysaccharide production protein	0.157574	0	0.0894646
A9CF06	Atu3328	Aldehyde dehydrogenase-like protein	DSM only	0	0.202542
A9CF07	bioA Atu3329	Adenosylmethionine-8-amino-7-oxononanoate aminotransferase	DSM only	0	0.0806533
A9CF08	Atu3331	YkuD domain-containing protein	DRM only	1	0.00824689
A9CF13	thuK Atu3341	ABC transporter, nucleotide binding/ATPase protein (Trehalose/maltose)	DRM only	1	0.0310978
A9CF14	thuA Atu3342	Trehalose utilization-related protein	DRM only	0	0.0696772
A9CF15	ThuB Atu3343	Trehalose utilization-related protein	5.14601	0	0.13479
A9CF18	Atu3347	Uncharacterized protein	DRM only	0	0.265856
A9CF19	Atu3349	ABC transporter, nucleotide binding/ATPase protein	DRM only	1	0.0112989
A9CF23	manC Atu3353	Mannose-1-phosphate guanylyltransferase (EC 2.7.7.13)	DRM only	0	0.070851
A9CF24	Atu3354	Pyrroloquinoline-quinone-dependent quinate dehydrogenase	8.13305	1	0.0295879
A9CF25	Atu3356	NADP-dependent malic enzyme	0.008126	0	0.109029
A9CF26	Atu3359	ABC transporter, membrane spanning protein (Amino acid)	DRM only	0	0.251209
A9CF27	Atu3361	Uncharacterized protein	0.385793	0	0.351234
A9CF28	Atu3362	Monooxygenase	DRM only	0	0.154985
A9CF30	Atu3364	D-amino acid dehydrogenase	1.69174	0	0.653869
A9CF33	Atu3368	Periplasmic mannitol-binding protein	0.719406	0	0.702081
A9CF34	Atu3369	Glutamine amidotransferase type-1 domain-containing protein	DSM only	0	0.288927
A9CF35	Atu3370	ABC transporter, membrane spanning protein (Sugar)	0.832781	0	0.468052
A9CF37	Atu3375	ABC transporter, substrate binding protein (Peptide)	DRM only	0	0.456497
A9CF38	Atu3377	ABC transporter, nucleotide binding/ATPase protein (Peptide)	2.84658	1	0.0175064
A9CF41	Atu3381	Transcriptional regulator, LysR family	DRM only	0	0.177524
A9CF48	Atu3390	ABC transporter, substrate binding protein (Iron)	DRM only	0	0.472593
A9CF53	Atu3396	ABC transporter, substrate binding protein (Iron)	DSM only	0	0.120555
A9CF58	Atu3407	Aminotransferase, class III	DRM only	0	0.226981
A9CF63	Atu3412	ABC transporter, nucleotide binding/ATPase protein	DRM only	0	0.189875
A9CF75	Atu3437	ABC transporter, nucleotide binding/ATPase protein (Oligopeptide)	DRM only	0	0.220301
A9CF76	Atu3438	Putative oxidoreductase	0.309366	0	0.139334
A9CF77	Atu3440	Transcriptional regulator, LysR family	DRM only	0	0.203244
A9CF79	Atu3442	ABC transporter, substrate binding protein (Oligopeptide)	DRM only	0	0.230662
A9CF82	Atu3446	Monooxygenase	DRM only	0	0.268035
A9CF92	Atu3461	Transcriptional regulator, GntR family	DRM only	0	0.227771
A9CF95	Atu3464	Dehydrogenase	DRM only	0	0.183761
A9CF98	bkdA2 Atu3472	2-oxoisovalerate dehydrogenase beta subunit	DRM only	0	0.183628
A9CFA3	acd Atu3477	Acyl-CoA dehydrogenase	DRM only	0	0.413965
A9CFA5	Atu3486	Transcriptional regulator, DeoR family	DRM only	1	0.0189535
A9CFB1	Atu3495	GGDEF family protein	DRM only	1	0.0204735
A9CFB4	Atu3502	ABC transporter, membrane spanning protein	DRM only	0	0.880594
A9CFC7	Atu3536	ABC transporter, nucleotide binding/ATPase protein	DRM only	0	0.22384
A9CFD1	dhbK Atu3543	3,4-dihydroxy-2-butanone kinase	DRM only	0	0.342094
A9CFD2	arsB Atu3544	Arsenical pump membrane protein	DRM only	0	0.301357
A9CFD4	Atu3546	Uncharacterized protein	4.33814	1	0.00934428
A9CFD7	Atu3556	Exopolysaccharide polymerization/transport protein	DRM only	0	0.183628
A9CFD9	Atu3560	Glycosyltransferase	DRM only	0	0.220301
A9CFE4	Atu3572	Transcriptional regulator, HTH family	0.219154	1	0.0171239
A9CFE6	xylG Atu3574	ABC transporter, nucleotide binding/ATPase protein (Xylose)	4.56048	1	0.0379276
A9CFE7	xylF Atu3576	ABC transporter, substrate binding protein (Xylose)	0.0251186	1	0.00481176
A9CFE8	mutA Atu3580	Methylmalonyl-CoA mutase	0.35783	0	0.154141
A9CFF1	etfB Atu3595	Electron transfer flavoprotein beta subunit	0.103279	0	0.17539
A9CFF2	hbdA Atu3597	3-hydroxybutyryl-CoA dehydrogenase	2.8102	1	0.0316479
A9CFF3	dsbE Atu3598	Thiol:disulfide interchange protein	0.554525	0	0.207882
A9CFF4	Atu3600	Uncharacterized protein	DRM only	0	0.184483
A9CFF8	ftsE Atu3606	Cell division ATP-binding protein FtsE	DRM only	1	9.20122e-05
A9CFF9	ftsX Atu3607	Cell division protein	15.4093	1	0.0323912
A9CFG0	Atu3608	DUF218 domain-containing protein	DRM only	0	0.082363
A9CFG1	plsC Atu3609	1-acyl-sn-glycerol-3-phosphate acyltransferase	DRM only	0	0.0597317
A9CFG6	cobT Atu3621	Cobyrinic acid synthase	2.85993	0	0.116393
A9CFG7	cobS Atu3622	Cobalamin biosynthesis protein	5.14485	1	0.0363838
A9CFG8	Atu3628	Uncharacterized protein	DRM only	0	0.271366
A9CFH0	Atu3633	CobW C-terminal domain-containing protein	16.7781	0	0.0744544
A9CFH2	Atu3640	Uncharacterized protein	DRM only	0	0.113579
A9CFH3	Atu3641	DUF2169 domain-containing protein	2.20131	0	0.241171
A9CFI1	Atu3661	Uncharacterized protein	DRM only	0	0.125265
A9CFI6	Atu3672	Polyketide synthase, siderophore biosynthesis protein	0.295049	0	0.378511
A9CFI7	Atu3675	Peptide synthetase, siderophore biosynthesis protein	2.13226	0	0.0703333
A9CFJ1	Atu3682	Non-ribosomal peptide synthetase, siderophore biosynthesis protein	1.34705	0	0.717811
A9CFJ2	Atu3684	Siderophore biosynthesis protein	DRM only	0	0.186523
A9CFJ7	fecR Atu3693	Two component sensor kinase	DRM only	0	0.116401
A9CFJ8	Atu3699	tRNA_edit domain-containing protein	DRM only	0	0.954008
A9CFK0	serA Atu3706	D-3-phosphoglycerate dehydrogenase (EC 1.1.1.95)	1.39714	1	0.00326618
A9CFK1	serC Atu3707	Phosphoserine transaminase (EC 2.6.1.52)	DSM only	0	0.0621254
A9CFK2	tolA Atu3715	Uncharacterized protein	0.477699	0	0.527556
A9CFK3	tolR Atu3716	TolR protein	DRM only	1	0.0191296
A9CFK9	tktA Atu3736	Transketolase (EC 2.2.1.1)	0.180687	0	0.144415
A9CFL0	gapA Atu3737	Glyceraldehyde-3-phosphate dehydrogenase (EC 1.2.1.-)	0.140078	0	0.080426
A9CFL1	Atu3740	Fructose-bisphosphate aldolase (EC 4.1.2.13)	3.08709	0	0.100433
A9CFL2	Atu3741	MFS permease	DRM only	1	0.010092
A9CFL3	Atu3744	ABC transporter, nucleotide binding/ATPase protein	DRM only	1	0.0355664
A9CFL4	Atu3745	FAD_binding_2 domain-containing protein	1.11277	0	0.809073
A9CFL5	suhB Atu3748	Inositol-1-monophosphatase (EC 3.1.3.25)	0.179178	0	0.177178
A9CFL6	Atu3751	Probable membrane transporter protein	DRM only	1	0.0192847
A9CFL8	purE Atu3754	N5-carboxyaminoimidazole ribonucleotide mutase (N5-CAIR mutase) (EC 5.4.99.18) (5-(carboxyamino)imidazole ribonucleotide mutase)	DSM only	0	0.0651798
A9CFM1	pykA Atu3762	Pyruvate kinase (EC 2.7.1.40)	0.282804	0	0.166003
A9CFM2	Atu3764	Sigma 54 dependent transcriptional activator	2.32264	0	0.0674547
A9CFM4	Atu3768	Homospermidine synthase	DSM only	0	0.083227
A9CFM5	Atu3772	PHB domain-containing protein	2.83086	1	0.00336095
A9CFM6	Atu3773	NfeD domain-containing protein	3.00449	1	0.0328732
A9CFM8	galU Atu3778	UTP--glucose-1-phosphate uridylyltransferase (EC 2.7.7.9) (UDP-glucose pyrophosphorylase)	0.191679	0	0.239825
A9CFN1	gltD Atu3783	Glutamate synthase, small subunit	1.20752	0	0.800551
A9CFN3	kdpE Atu3786	Two component response regulator	DRM only	1	0.00600842
A9CFN5	ansP Atu3792	L-asparagine permease	DRM only	0	0.177524
A9CFN7	Atu3795	AcrB/AcrD/AcrF family protein	0.882244	0	0.85347
A9CFN8	Atu3796	Efflux protein	21.2657	1	4.99414e-05
A9CFN9	Atu3797	HlyD family secretion protein	7.87497	1	0.00256406
A9CFP0	proV Atu3802	ABC transporter, nucleotide binding/ATPase protein (Proline/glycine betaine)	5.25278	0	0.438182
A9CFP6	Atu3808	Transcriptional regulator, LysR family	DRM only	0	0.226981
A9CFP7	Atu3810	Transcriptional regulator, LysR family	DRM only	0	0.185701
A9CFQ1	Atu3817	Dehydratase	DRM only	0	0.113136
A9CFQ4	metE Atu3823	5-methyltetrahydropteroyltriglutamate-homocysteine methyltransferase	DRM only	0	0.188297
A9CFQ5	Atu3824	Uncharacterized protein	DRM only	0	0.183628
A9CFQ6	Atu3827	HTH-type transcriptional regulator MetR	0.550049	0	0.626308
A9CFR0	int Atu3831	Phage-related integrase	DRM only	0	0.22384
A9CFR1	Atu3832	Uncharacterized protein	1.72505	0	0.291024
A9CFR4	Atu3835	Uncharacterized protein	DSM only	0	0.0717585
A9CFR5	Atu3842	Uncharacterized protein	DRM only	0	0.218164
A9CFR8	Atu3860	Chitooligosaccharide deacetylase (Nodulation protein B)	DRM only	0	0.321952
A9CFS2	lldA Atu3871	L-lactate dehydrogenase	0.668864	0	0.444607
A9CFS7	Atu3884	Uncharacterized protein	0.867106	0	0.867963
A9CFS8	pldB Atu3886	Lysophospholipase	DRM only	1	0.02834
A9CFS9	hspL Atu3887	Small heat shock protein	0.267181	1	0.0103411
A9CFT5	Atu3895	ABC transporter, nucleotide binding/ATPase protein (Sugar)	DRM only	0	0.119359
A9CFT6	Atu3896	ABC transporter, nucleotide binding/ATPase protein (Sugar)	DRM only	0	0.245645
A9CFT7	glpD Atu3897	Glycerol-3-phosphate dehydrogenase (EC 1.1.5.3)	DRM only	0	0.287842
A9CFU1	Atu3913	Biotin carboxylase	DRM only	0	0.319413
A9CFU3	repB Atu3923	Replication protein B	1.45581	0	0.500217
A9CFU4	Atu3925	Uncharacterized protein	0.297374	0	0.42829
A9CFU7	Atu3930	AB hydrolase-1 domain-containing protein	DRM only	0	0.271366
A9CFU9	Atu3952	Oxidoreductase	DSM only	0	0.296193
A9CFV3	Atu3956	ABC transporter, nucleotide binding/ATPase protein	DSM only	0	0.988961
A9CFV6	Atu3965	Oxidoreductase	DRM only	0	0.226981
A9CFW0	ilvD Atu3971	Dihydroxy-acid dehydratase	DSM only	0	0.282041
A9CFX3	copB Atu3992	Copper tolerance protein	2.65576	0	0.394218
A9CFX4	Atu3996	N-acetyltransferase domain-containing protein	DRM only	0	0.183628
A9CFX5	bioB Atu3997 AGR_L_1708	Biotin synthase (EC 2.8.1.6)	DRM only	0	0.446627
A9CFX6	bioF Atu3998	8-amino-7-oxononanoate synthase	DRM only	1	0.0392062
A9CFY2	idhA Atu4012	Myo-inositol 2-dehydrogenase	DRM only	0	0.198252
A9CFY3	cyaA Atu4013	Putative adenylate cyclase	DRM only	0	0.0851975
A9CFY5	Atu4019	Two component response regulator	DRM only	0	0.220756
A9CFY6	Atu4020	Uncharacterized protein	2.42267	0	0.120971
A9CFY8	Atu4026	Uncharacterized protein	4.03804	1	0.0191755
A9CFZ0	Atu4030	ABC transporter, membrane spanning protein (Sugar)	DRM only	1	0.00746514
A9CFZ1	Atu4031	ABC transporter, membrane spanning protein (Sugar)	DRM only	0	0.0742976
A9CFZ2	Atu4032	ABC transporter, nucleotide binding/ATPase protein (Sugar)	1.90217	1	0.0239255
A9CFZ3	Atu4033	ABC transporter, substrate binding protein (Sugar)	0.14801	1	0.00170705
A9CFZ4	Atu4036	DNA topoisomerase	DRM only	0	0.183761
A9CFZ9	exoP Atu4049	Exopolysaccharide polymerization/transport protein	5.50482	1	0.0328244
A9CG00	exoN Atu4050	Alpha-D-glucosyl-1-phosphate uridylyltransferase (EC 2.7.7.9) (UDP-glucose pyrophosphorylase) (UTP--glucose-1-phosphate uridylyltransferase) (Uridine diphosphoglucose pyrophosphorylase)	DRM only	0	0.184925
A9CG01	exoO Atu4051	Succinoglycan biosynthesis glycosyltransferase	DRM only	0	0.160538
A9CG02	exoM Atu4052	UDP-hexose transferase	1.04108	0	0.905731
A9CG03	exoL Atu4054	Succinoglycan biosynthesis protein	4.29181	0	0.0878372
A9CG04	exoV Atu4059	Succinoglycan biosynthesis protein	DRM only	1	0.036522
A9CG07	soxD Atu4068	Sarcosine oxidase delta subunit	0.328978	0	0.199886
A9CG08	soxA Atu4069	Sarcosine oxidase subunit alpha (EC 1.5.3.1)	0.420068	0	0.324793
A9CG09	soxG Atu4070	Sarcosine oxidase gamma subunit	0.340514	1	0.0274179
A9CG11	nodN Atu4072	Nodulation protein N	DRM only	0	0.275174
A9CG13	glgP Atu4078	Alpha-1,4 glucan phosphorylase (EC 2.4.1.1)	2.38908	0	0.172809
A9CG16	garR Atu4085	2-hydroxy-3-oxopropionate reductase	DRM only	0	0.892154
A9CG19	cydC Atu4090	ABC transporter, nucleotide binding/ATPase protein	DRM only	0	0.852624
A9CG20	cydA Atu4091	Cytochrome d oxidase	17.8165	1	0.046371
A9CG21	cydB Atu4092	Cytochrome d oxidase subunit II	DRM only	0	0.21052
A9CG22	Atu4094	DUF3597 domain-containing protein	DSM only	0	0.0566937
A9CG31	dppA Atu4113	ABC transporter, substrate binding protein (Dipeptide)	DSM only	1	0.0468216
A9CG32	dppB Atu4114	ABC transporter, membrane spanning protein (Dipeptide)	DRM only	1	0.000222978
A9CG33	dppC Atu4115	ABC transporter, membrane spanning protein (Dipeptide)	DRM only	1	0.00178744
A9CG34	dppD Atu4116	ABC transporter, nucleotide binding/ATPase protein (Dipeptide)	1.13533	0	0.500801
A9CG35	dppF Atu4117	ABC transporter, nucleotide binding/ATPase protein (Dipeptide)	3.9897	1	0.00560875
A9CG37	Atu4122	Transcriptional regulator, LysR family	DRM only	0	0.30732
A9CG40	Atu4125	ABC transporter, nucleotide binding/ATPase protein (Branched chain amino acid)	DRM only	0	0.285201
A9CG45	acsA Atu4130	Acetoacetyl-CoA synthetase	DRM only	0	0.864462
A9CG47	gcd Atu4135	Glucose dehydrogenase	9.18572	1	0.00842805
A9CG55	lspL Atu4148	UDP-glucuronic acid epimerase	2.36943	0	0.323461
A9CG56	ugdH Atu4149	UDP-glucose 6-dehydrogenase (EC 1.1.1.22)	4.50995	1	0.00735819
A9CG59	putA Atu4157	Bifunctional protein PutA [Includes: Proline dehydrogenase (EC 1.5.5.2) (Proline oxidase); Delta-1-pyrroline-5-carboxylate dehydrogenase (P5C dehydrogenase) (EC 1.2.1.88) (L-glutamate gamma-semialdehyde dehydrogenase)]	0.488309	0	0.473182
A9CG61	Atu4160	RNA polymerase sigma factor	1.19968	0	0.496063
A9CG65	nspC Atu4169	Carboxynorspermidine/carboxyspermidine decarboxylase (CANS DC/CAS DC) (CANSDC/CASDC) (EC 4.1.1.96)	0.0139193	1	0.0413248
A9CG66	Atu4170	Uncharacterized protein	DRM only	0	0.107907
A9CG67	deaD Atu4171	Cold-shock dead-box protein A	7.24773	0	0.126907
A9CG68	lysC Atu4172	Aspartokinase (EC 2.7.2.4)	1.56905	0	0.560948
A9CG69	ptsI Atu4173	Phosphoenolpyruvate--protein phosphotransferase (EC 2.7.3.9)	2.67202	0	0.0734517
A9CG70	prmC hemK Atu4175	Release factor glutamine methyltransferase (RF MTase) (EC 2.1.1.297) (N5-glutamine methyltransferase PrmC) (Protein-(glutamine-N5) MTase PrmC) (Protein-glutamine N-methyltransferase PrmC)	DRM only	0	0.521351
A9CG71	Atu4178	Peptidase_M23 domain-containing protein	0.788994	0	0.816522
A9CG85	Atu4219	Cation efflux system protein	DRM only	0	0.896883
A9CG86	Atu4220	Short-chain dehydrogenase	DRM only	0	0.538463
A9CG88	soxA Atu4222	Sarcosine oxidase subunit alpha (EC 1.5.3.1)	DRM only	0	0.317551
A9CG91	glxA Atu4225	Transcriptional regulator, AraC family	DRM only	0	0.220301
A9CG94	gltB Atu4229	Glutamate synthase large subunit	DRM only	0	0.990067
A9CG97	Atu4235	ABC transporter, nucleotide binding/ATPase protein (Amino acid)	DRM only	0	0.18785
A9CGA5	Atu4243	ABC transporter, substrate binding protein (Polyamine)	DSM only	0	0.351344
A9CGA8	Atu4246	ABC transporter, nucleotide binding/ATPase protein (Polyamine)	DRM only	0	0.265856
A9CGB5	Atu4258	ABC transporter, membrane spanning protein (Oligopeptide)	DRM only	1	0.0163177
A9CGB6	Atu4259	ABC transporter, substrate binding protein (Oligopeptide)	DSM only	0	0.0915165
A9CGC7	accC Atu4273	Biotin carboxylase (EC 6.3.4.14) (EC 6.4.1.2)	DRM only	0	0.226981
A9CGD0	Atu4280	Short-chain dehydrogenase	DRM only	0	0.183628
A9CGD9	yafB Atu4294	Oxidoreductase	DRM only	0	0.0556941
A9CGE0	Atu4296	Dehydrogenase	DRM only	0	0.112563
A9CGE1	Atu4298	Uncharacterized protein	DRM only	0	0.584459
A9CGF3	rbsB Atu4320	ABC transporter, substrate binding protein (Ribose)	DSM only	1	0.00945069
A9CGF5	rdh Atu4323	Ribitol 2-dehydrogenase	DRM only	1	0.0354639
A9CGF8	bexD Atu4329	Polysaccharide export protein	2.49934	0	0.051589
A9CGF9	impL Atu4332	IcmF family protein	3.38894	1	0.029413
A9CGG0	impJ Atu4334	Uncharacterized protein	0.472104	1	0.0182801
A9CGG1	impI Atu4335	Putative forkhead-type phosphopeptide-binding protein	4.85931	1	0.0103442
A9CGG2	impH Atu4336	Uncharacterized protein	DRM only	0	0.0921899
A9CGG3	impG Atu4337	Uncharacterized protein	1.62942	0	0.218204
A9CGG5	impC Atu4341	Uncharacterized protein	1.79417	1	0.00925844
A9CGG6	impB Atu4342	Uncharacterized protein	1.98658	0	0.317034
A9CGG7	impA Atu4343	ImpA_N domain-containing protein	30.3966	0	0.062042
A9CGG8	Atu4345	Uncharacterized protein	14.4425	0	0.0669234
A9CGH0	vgrG Atu4348	VgrG protein	1.67984	1	0.0190112
A9CGH1	Atu4350	Ntox15 domain-containing protein	1.18203	0	0.490212
A9CGI0	Atu4361	ABC transporter, substrate binding protein (Sugar)	DSM only	0	0.338734
A9CGI3	thuR Atu4364	Transcriptional regulator, LacI family	DSM only	1	0.0317477
A9CGI9	Atu4375	Uncharacterized protein	DRM only	0	0.294836
A9CGJ1	Atu4377	Oxidoreductase	DRM only	0	0.183527
A9CGK2	Atu4394	Uncharacterized protein	0.27807	0	0.373544
A9CGL3	napF Atu4406	Ferredoxin-type protein NapF	DRM only	0	0.230662
A9CGL6	napC Atu4410	Cytochrome c-type protein	DRM only	1	0.0176535
A9CGL8	gcdH Atu4418	Glutaryl-CoA dehydrogenase	0.294766	0	0.334057
A9CGM0	Atu4421	ABC transporter, substrate binding protein (Spermidine/putrescine)	DRM only	0	0.196009
A9CGM1	Atu4422	ABC transporter, membrane spanning protein (Spermidine/putrescine)	DRM only	0	0.229055
A9CGM2	Atu4423	ABC transporter, membrane spanning protein	DRM only	0	0.270066
A9CGM3	Atu4424	ABC transporter, nucleotide binding/ATPase protein (Spermidine/putrescine)	0.537976	1	0.0388384
A9CGM7	Atu4430	Dipeptidase	DRM only	0	0.316531
A9CGM8	Atu4431	ABC transporter, substrate binding protein (Oligopeptide)	DSM only	1	0.0247014
A9CGM9	Atu4432	ABC transporter, membrane spanning protein (Oligopeptide)	DRM only	0	0.263272
A9CGN0	Atu4433	ABC transporter, membrane spanning protein (Oligopeptide)	DRM only	0	0.192971
A9CGN1	Atu4434	ABC transporter, nucleotide binding/ATPase protein (Oligopeptide)	1.25833	0	0.618977
A9CGN2	Atu4435	ABC transporter, nucleotide binding/ATPase protein (Oligopeptide)	2.60897	0	0.327675
A9CGN7	Atu4442	DJ-1_PfpI domain-containing protein	0.773013	0	0.59273
A9CGN9	Atu4445	ABC transporter, nucleotide binding/ATPase protein	DRM only	0	0.183527
A9CGP2	Atu4450	ABC transporter, nucleotide binding/ATPase protein (Sugar)	DSM only	0	0.563823
A9CGP6	Atu4456	Uncharacterized protein	DRM only	1	0.0239289
A9CGP8	ada Atu4459	6-O-methylguanine-DNA methyltransferase	DRM only	0	0.0544727
A9CGQ1	kdgR Atu4465	Transcriptional regulator	DSM only	0	0.234157
A9CGQ2	sitD Atu4468	ABC transporter, membrane spanning protein (Iron transport)	DRM only	1	0.00282668
A9CGQ7	Atu4481	Transcriptional regulator, LacI family	DRM only	1	0.0235272
A9CGQ8	Atu4488	ABC transporter, membrane spanning protein	DRM only	0	0.0599733
A9CGQ9	Atu4489	Outer membrane lipoprotein	DSM only	0	0.0626168
A9CGR1	Atu4498	Nickel/cobalt efflux system	DRM only	0	0.112705
A9CGR2	Atu4501	ANAPC4_WD40 domain-containing protein	0.19397	0	0.36445
A9CGR3	cobW Atu4502	Cobalamin synthesis protein	3.17807	1	0.0163189
A9CGR4	Atu4503	Creatinine amidohydrolase	DRM only	0	0.183628
A9CGR6	Atu4507	Dehydrogenase	8.92212	0	0.087181
A9CGR8	iolB Atu4509	Uncharacterized protein	DRM only	0	0.303291
A9CGS0	iolD Atu4511	Acetolactate synthase	0.42298	0	0.271066
A9CGS3	livM Atu4517	ABC transporter, membrane spanning protein (Branched chain amino acid)	DRM only	0	0.183761
A9CGS6	Atu4524	ABC transporter, membrane spanning protein (Oligopeptide)	DRM only	0	0.142509
A9CGS7	Atu4525	ABC transporter, substrate binding protein (Oligopeptide)	1.53646	0	0.57961
A9CGS8	Atu4526	ABC transporter, nucleotide binding/ATPase protein	12.2581	1	0.0178962
A9CGT9	Atu4562	Uncharacterized protein	DRM only	0	0.196861
A9CGU0	Atu4566	Serine protease	DRM only	0	0.220301
A9CGV0	Atu4587	Uncharacterized protein	DRM only	0	0.234806
A9CGV8	Atu4600	ABC transporter, nucleotide binding/ATPase protein	9.54697	1	0.00793187
A9CGW2	Atu4608	Glyco_trans_2-like domain-containing protein	1.67414	0	0.466999
A9CGW4	Atu4610	Sugar nucleotide epimerase/dehydratase	11.257	1	0.00155656
A9CGW5	wbbL Atu4614	Glycosyltransferase	DRM only	0	0.154518
A9CGW6	rfbD Atu4616	dTDP-4-dehydrorhamnose reductase (EC 1.1.1.133)	4.5498	1	0.0148939
A9CGW7	rffB Atu4617	dTDP-glucose 4,6-dehydratase (EC 4.2.1.46)	DRM only	0	0.394951
A9CGW8	dppF Atu4620	ABC transporter, nucleotide binding/ATPase protein (Dipeptide)	DRM only	0	0.221827
A9CGX1	Atu4624	Transcriptional regulator, GntR family	DRM only	0	0.452024
A9CGX2	uxuA Atu4625	Mannonate dehydratase (EC 4.2.1.8)	DRM only	0	0.634693
A9CGX3	Atu4632	3'-phosphoesterase (EC 6.5.1.1) (DNA repair polymerase) (NHEJ DNA polymerase) (Polydeoxyribonucleotide synthase [ATP]) (Polymerase/primase)	DSM only	0	0.772517
A9CGX5	Atu4634	Uncharacterized protein	0.726643	0	0.475383
A9CGX9	oxyR Atu4641	Transcriptional regulator, LysR family	DRM only	0	0.0907822
A9CGY1	vdh Atu4645	Vanillin: NAD oxidoreductase (Putative)	13.532	1	0.00816565
A9CGY4	Atu4650	ABC transporter, nucleotide binding/ATPase protein (Sugar)	DRM only	0	0.1289
A9CGY7	Atu4654	ABC transporter, substrate binding protein (Sugar)	DSM only	0	0.23118
A9CGZ1	Atu4666	HlyD family secretion protein	16.7005	1	0.000199194
A9CGZ2	Atu4668	ABC transporter, membrane spanning protein	DRM only	0	0.203643
A9CGZ3	ftsZ1 ftsZ Atu4673	Cell division protein FtsZ	13.1551	1	0.000504363
A9CGZ4	dapA Atu4675	Dihydrodipicolinate synthase	DSM only	0	0.185496
A9CGZ5	Atu4678	ABC transporter, substrate binding protein (Amino acid)	DSM only	0	0.196419
A9CGZ8	Atu4681	ABC transporter, nucleotide binding/ATPase protein (Amino acid)	2.91662	0	0.0740805
A9CGZ9	dadA Atu4682	D-amino acid dehydrogenase, small subunit	DRM only	0	0.441444
A9CH01	Atu4684	Trans-3-hydroxy-L-proline dehydratase (T3LHyp dehydratase) (t3HypD) (EC 4.2.1.77) (4-hydroxyproline 2-epimerase) (4Hyp 2-epimerase) (4HypE) (EC 5.1.1.8) (Trans-L-3-hydroxyproline dehydratase)	4.24502	0	0.457276
A9CH04	Atu4691	2-hydroxyacid dehydrogenase	DRM only	0	0.250189
A9CH05	Atu4693	Porin	DRM only	0	0.193497
A9CH06	Atu4694	Chlorohydrolase	DRM only	0	0.0521643
A9CH09	Atu4705	Transcriptional regulator, LysR family	DRM only	0	0.0813276
A9CH10	nuoF Atu4707	NADH ubiquinone oxidoreductase chain F	0.985315	0	0.984741
A9CH11	fdsD Atu4709	NAD-dependent formate dehydrogenase delta subunit	DSM only	0	0.265143
A9CH14	Atu4716	Transcriptional regulator, LuxR family	DRM only	0	0.221827
A9CH18	exsA Atu4728	ABC transporter, nucleotide binding/ATPase protein	DRM only	0	0.183527
A9CH21	Atu4732	Fimbrial chaperone	0.0714121	1	0.0224679
A9CH23	acoR Atu4741	Transcriptional regulator	DRM only	0	0.183761
A9CH25	Atu4744	ABC transporter, substrate binding protein (Sugar)	DRM only	0	0.22384
A9CH36	Atu4760	Transcriptional regulator, GntR family	DSM only	0	0.288927
A9CH37	Atu4763	Transcriptional regulator, AsnC family	DSM only	0	0.0543849
A9CH39	phrB Atu4765	(6-4) photolyase (EC 4.1.99.13) ((6-4)DNA photolyase) (DNA photolyase PhrB) (Photoreactivating enzyme PhrB)	0.183445	1	0.0494182
A9CH45	nodW Atu4774	Two component response regulator	3.08965	0	0.0669485
A9CH52	bme11 Atu4793	Exopolysaccharide production protein	DRM only	0	0.48688
A9CH53	bme12 Atu4794	Polysaccharide biosynthesis protein	0.547017	0	0.513413
A9CH56	Atu4805	Histidine kinase (EC 2.7.13.3)	1.11303	0	0.887487
A9CH58	amsJ Atu4808	Exopolysaccharide synthesis protein	DRM only	0	0.226981
A9CH59	Atu4809	Glycosyltransferase	DRM only	0	0.117239
A9CH66	fabG Atu4821	3-oxoacyl-(Acyl-carrier protein) reductase	DRM only	0	0.260836
A9CH67	Atu4822	Fatty acid CoA ligase	DSM only	0	0.114126
A9CH68	acaB Atu4823	Acetyl CoA synthase	DRM only	0	0.128779
A9CH73	zwf Atu4835	Glucose-6-phosphate 1-dehydrogenase (G6PD) (EC 1.1.1.49)	DRM only	0	0.985836
A9CH79	rbsC Atu4844	ABC transporter, membrane spanning protein (Sugar)	DRM only	0	0.0556941
A9CH81	Atu4846	Uncharacterized protein	DRM only	0	0.303291
A9CHA0	Atu4876	Putative oxidoreductase	DSM only	1	0.010325
A9CHB0	Atu4897	Uncharacterized protein	DSM only	1	0.00526916
A9CHB1	rho Atu2833	Transcription termination factor Rho (EC 3.6.4.-) (ATP-dependent helicase Rho)	0.258014	1	0.0238338
A9CHB2	mnmE trmE Atu2832 AGR_C_5135	tRNA modification GTPase MnmE (EC 3.6.-.-)	DRM only	0	0.444389
A9CHB4	Atu2824	Uncharacterized protein	17.2122	1	0.0275533
A9CHB8	uxaB Atu2813	Altronate oxidoreductase	DRM only	0	0.348455
A9CHC1	cobW Atu2805	Cobalamin synthesis protein	1.74486	0	0.171394
A9CHC2	cobN Atu2804	Cobaltochelatase subunit	DRM only	0	0.127723
A9CHC3	cbiC Atu2802	Precorrin-8X methylmutase	DRM only	0	0.0864174
A9CHC4	cobI Atu2801	Precorrin-2 C20 methyltransferase	DRM only	1	0.0329989
A9CHC7	cobM Atu2796	Precorrin-4 C11-methyltransferase	DRM only	0	0.0635867
A9CHC9	Atu2789	Uncharacterized protein	DRM only	0	0.255
A9CHD1	Atu2783	Acetyltransferase	DRM only	0	0.220301
A9CHD2	Atu2773	Uncharacterized protein	1.17966	0	0.878872
A9CHD3	phbA Atu2769	Acetyl-CoA acetyltransferase poly-beta-hydroxybutyrate biosynthesis	0.337986	0	0.309148
A9CHD4	Atu2767	Uncharacterized protein	DRM only	0	0.213692
A9CHD5	gdh Atu2766	Glutamate dehydrogenase (EC 1.4.1.2)	1.96843	0	0.577084
A9CHD6	Atu2765	Transcriptional regulator, CarD family	0.131037	1	0.0068671
A9CHD7	mtrA Atu2763	Two component response regulator	1.84608	0	0.509843
A9CHD8	Atu2762	Cyclic nucleotide-binding domain-containing protein	DRM only	1	0.0268354
A9CHD9	Atu2761	Exodeoxyribonuclease III (EC 3.1.11.2)	DRM only	0	0.701121
A9CHE0	Atu2760	Uncharacterized protein	DSM only	0	0.147837
A9CHE3	Atu2755	Putative 2-octaprenyl-6-methoxyphenol	2.6296	1	0.01964
A9CHE4	mgpS Atu2753	ATP-dependent helicase	0.313838	1	0.0175551
A9CHE5	Atu2752	S4 RNA-binding domain-containing protein	DSM only	0	0.129586
A9CHE7	Atu2750	DNA_pol3_delta domain-containing protein	DRM only	1	0.0451984
A9CHE8	Atu2749	Uncharacterized protein	6.56415	1	0.000189554
A9CHF0	Atu2744	C4-dicarboxylate binding protein	0.349884	1	0.0145774
A9CHF1	Atu2743	DctM domain-containing protein	DRM only	0	0.144008
A9CHF3	Atu2740	Transcriptional regulator, GntR family	DRM only	0	0.452024
A9CHF4	Atu2739	Oxidoreductase	DRM only	0	0.229055
A9CHF7	ilvD Atu2736	Dihydroxy-acid dehydratase	DRM only	0	0.950307
A9CHF8	ilvA Atu2735	Threonine dehydratase	DRM only	0	0.0523958
A9CHG0	hipO Atu2732	Hippurate hydrolase	DRM only	1	0.00336911
A9CHG1	pycA Atu2726	Pyruvate carboxylase (EC 6.4.1.1)	3.30625	0	0.414404
A9CHG3	Atu2724	MFS permease	DRM only	0	0.0844619
A9CHG4	ompA Atu2722	Porin	12.5999	0	0.0611598
A9CHG6	uup Atu2716	ATP-binding protein Uup (EC 3.6.1.-)	DRM only	0	0.0976918
A9CHG8	thiP Atu2713	ABC transporter, membrane spanning protein (Thiamine)	DRM only	0	0.271366
A9CHH2	ftsY Atu2693	Signal recognition particle receptor FtsY (SRP receptor)	1.3192	0	0.340329
A9CHH3	ccmG Atu2690	Thiol:disulfide interchange protein	DRM only	1	0.0452656
A9CHH4	ccmC Atu2688	Heme exporter protein C (Cytochrome c-type biogenesis protein)	DRM only	1	0.0167585
A9CHH6	acnA Atu2685	Aconitate hydratase (Aconitase) (EC 4.2.1.3)	1.83129	0	0.278305
A9CHH9	Atu2682	Uncharacterized protein	DRM only	0	0.0800636
A9CHI0	Atu2681	Uncharacterized protein	7.49148	0	0.233009
A9CHI3	Atu2670	ABC transporter, nucleotide binding/ATPase protein	DRM only	1	0.0114635
A9CHI5	Atu2668	Oxidoreductase	3.15865	0	0.4628
A9CHI8	typA bipA Atu2663	50S ribosomal subunit assembly factor BipA (EC 3.6.5.-) (GTP-binding protein BipA)	13.3801	1	0.0022916
A9CHI9	Atu2662	Acetyltransferase	DRM only	0	0.183761
A9CHJ0	guaA Atu2658	GMP synthase-glutamine amidotransferase protein	DRM only	1	0.0354345
A9CHJ1	Atu2657	TerB domain-containing protein	DRM only	0	0.183628
A9CHJ7	sdhD Atu2644	Succinate dehydrogenase hydrophobic membrane anchor subunit	DRM only	0	0.184745
A9CHJ8	sdhA Atu2643	Succinate dehydrogenase flavoprotein subunit (EC 1.3.5.1)	0.669152	0	0.398878
A9CHJ9	sdhB Atu2642	Succinate dehydrogenase iron-sulfur subunit (EC 1.3.5.1)	0.552825	0	0.0814495
A9CHK0	sucD Atu2637	Succinate--CoA ligase [ADP-forming] subunit alpha (EC 6.2.1.5) (Succinyl-CoA synthetase subunit alpha) (SCS-alpha)	1.6943	0	0.0612176
A9CHK1	sucA Atu2636	Alpha-ketoglutarate dehydrogenase (EC 1.2.4.2)	0.15443	0	0.264325
A9CHK2	sucB Atu2635	Dihydrolipoyllysine-residue succinyltransferase component of 2-oxoglutarate dehydrogenase complex (EC 2.3.1.61) (2-oxoglutarate dehydrogenase complex component E2)	0.188129	0	0.101972
A9CHK4	lpdA Atu2632	Dihydrolipoyl dehydrogenase (EC 1.8.1.4)	0.0534279	1	0.0458197
A9CHK6	Atu2614	Gly-zipper_Omp domain-containing protein	DRM only	0	0.311914
A9CHK7	Atu2610	FAD-dependent monooxygenase	2.61926	0	0.108534
A9CHL0	glmS Atu2607	Glucosamine--fructose-6-phosphate aminotransferase	DRM only	0	0.183761
A9CHL1	Atu2606	Transcriptional regulator, GntR family	DRM only	0	0.220301
A9CHL5	malK Atu2600	ABC transporter, nucleotide binding/ATPase protein (Maltose/maltodextrin)	0.814517	0	0.63891
A9CHL7	Atu2596	Beta-N-acetylhexosaminidase (EC 3.2.1.52) (N-acetyl-beta-glucosaminidase)	0.139104	0	0.0995686
A9CHL8	Atu2595	Microcystinase C (MlrC)	DSM only	0	0.276653
A9CHL9	Atu2594	MFS permease	DSM only	0	0.351093
A9CHM0	Atu2589	ABC transporter, membrane spanning protein (Oligopeptide)	DRM only	0	0.1472
A9CHM1	Atu2586	ABC transporter, nucleotide binding/ATPase protein (Oligopeptide)	8.03935	0	0.0538674
A9CHM3	cyaA Atu2580	Adenylate cyclase	DRM only	1	0.0388947
A9CHM4	Atu2579	Metal dependant beta lactamase protein	DSM only	0	0.594811
A9CHM5	Atu2577	ABC transporter, nucleotide binding/ATPase protein	8.18821	1	0.020034
A9CHM6	Atu2576	Hydrolase_4 domain-containing protein	DRM only	0	0.132753
A9CHM8	acd Atu2572	Acyl-CoA dehydrogenase	7.68242	1	0.0141119
A9CHN4	Atu2557	Uncharacterized protein	DRM only	0	0.183761
A9CHN6	Atu2551	Efflux pump membrane transporter	18.6132	1	0.00231366
A9CHN7	stcD Atu2538	N-methylproline demethylase	DRM only	0	0.353626
A9CHP2	Atu2529	Amidohydro-rel domain-containing protein	DRM only	0	0.220301
A9CHP6	Atu2524	Uncharacterized protein	0.418477	0	0.360445
A9CHP8	lpiA Atu2521	Lysylphosphatidylglycerol synthase (EC 2.3.2.3)	DRM only	0	0.104689
A9CHQ2	dppD Atu2515	ABC transporter, nucleotide binding/ATPase protein (Dipeptide)	0.365365	0	0.509307
A9CHQ7	Atu2509	Sugar kinase	0.0278959	0	0.0528547
A9CHQ8	Atu2508	ABC transporter, nucleotide binding/ATPase protein (Sugar)	DRM only	0	0.336753
A9CHR1	Atu2505	ABC transporter, substrate binding protein (Sugar)	DRM only	0	0.742131
A9CHR4	pntB Atu2494	NAD(P) transhydrogenase subunit beta (EC 7.1.1.1) (Nicotinamide nucleotide transhydrogenase subunit beta)	DRM only	1	0.00632282
A9CHR5	pntA Atu2493	NAD(P) transhydrogenase subunit alpha (EC 7.1.1.1)	4.78619	1	0.0309614
A9CHR6	Atu2489	SLT_2 domain-containing protein	0.148375	1	0.0189809
A9CHR8	pdxK Atu2487	Pyridoxal kinase (EC 2.7.1.35)	0.457044	0	0.345584
A9CHR9	cls Atu2486	Choline phosphatase (Phospholipase D)	DRM only	1	0.0136079
A9CHS0	mexF Atu2483	Efflux pump membrane transporter	DRM only	0	0.123643
A9CHS8	Atu2471	Uncharacterized protein	DRM only	0	0.191046
A9CHT0	Atu2469	Uncharacterized protein	0.130092	1	0.0214803
A9CHT1	Atu2465	Sensor protein QseC (EC 2.7.13.3)	4.91643	0	0.0963996
A9CHT2	purU Atu2464	Formyltetrahydrofolate deformylase (EC 3.5.1.10) (Formyl-FH(4) hydrolase)	DSM only	0	0.208807
A9CHT3	Atu2463	META domain-containing protein	0.203345	1	0.0119787
A9CHU3	Atu2446	Uncharacterized protein	1.01203	0	0.987305
A9CHU4	rpoH Atu2445	RNA polymerase sigma factor RpoH (RNA polymerase sigma-32 factor)	0.384223	1	0.032429
A9CHU6	Atu2442	Uncharacterized protein	DRM only	1	0.0465025
A9CHU7	Atu2440	Uncharacterized protein	9.8995	1	0.0129815
A9CHU8	Atu2438	HPTransfase domain-containing protein	1.0934	0	0.844964
A9CHV0	ctrA Atu2434	Two component response regulator	DRM only	0	0.220301
A9CHV4	Atu2426	ABC transporter, membrane spanning protein (Branched chain amino acid)	DRM only	1	0.0357104
A9CHV5	Atu2424	ABC transporter, nucleotide binding/ATPase protein	4.84055	1	0.000137612
A9CHV7	Atu2420	AAA_28 domain-containing protein	DRM only	0	0.070851
A9CHV8	Atu2419	Transcriptional regulator, LuxR family	DSM only	0	0.288927
A9CHW0	Atu2417	Putative gluconate 5-dehydrogenase	1.35901	0	0.756622
A9CHW2	Atu2410	ABC transporter, nucleotide binding/ATPase protein (Urea/amide)	DSM only	0	0.202542
A9CHW8	Atu2393	Acr family transporter	32.3668	1	0.00705435
A9CHX1	Atu2388	ABC transporter, nucleotide binding/ATPase protein (Nitrate)	DRM only	0	0.150649
A9CHX5	exoM Atu2373	UDP-hexose transferase	DRM only	1	0.0233598
A9CHX6	exoU Atu2372	UDP-hexose transferase	DRM only	0	0.265856
A9CHX7	Atu2370	Uncharacterized protein	2.75465	0	0.098684
A9CHX8	nocP1 Atu2366	ABC transporter, nucleotide binding/ATPase protein	DRM only	0	0.219866
A9CHY2	Atu2362	S-methyltransferase	DRM only	1	0.00777404
A9CHY6	Atu2354	Transcriptional regulator, MarR family	4.84739	0	0.112087
A9CHY7	Atu2352	Uncharacterized protein	DRM only	1	0.00775974
A9CHZ2	Atu2340	TGc domain-containing protein	DRM only	1	0.00296624
A9CHZ3	Atu2339	Alpha-E domain-containing protein	DRM only	1	0.0264278
A9CHZ4	Atu2338	Uncharacterized protein	0.855931	0	0.812547
A9CHZ5	Atu2336	YkuD domain-containing protein	DRM only	1	0.0466122
A9CHZ6	Atu2335	Uncharacterized protein	DRM only	0	0.115228
A9CHZ8	Atu2333	ATP-dependent RNA helicase	DRM only	0	0.124258
A9CHZ9	Atu2331	Methyltransf_30 domain-containing protein	1.34601	0	0.706896
A9CI00	Atu2329	Uncharacterized protein	DRM only	0	0.0640289
A9CI02	Atu2327	2-oxo-4-hydroxy-4-carboxy-5-ureidoimidazoline decarboxylase (EC 4.1.1.97)	DRM only	0	0.22384
A9CI08	lldA Atu2318	L-lactate dehydrogenase	0.0767762	0	0.142843
A9CI11	Atu2314	Cytochrome c domain-containing protein	DRM only	0	0.123403
A9CI14	xdhC Atu2311	Xanthine dehydrogenase chaperone	DRM only	0	0.183527
A9CI19	Atu2303	Uncharacterized protein	DRM only	0	0.221827
A9CI21	Atu2301	TPR_21 domain-containing protein	8.77403	1	0.000937608
A9CI23	aglA Atu2295	Alpha-glucosidase	DSM only	0	0.189918
A9CI26	trpE(G) Atu2289	Anthranilate synthase (EC 4.1.3.27)	DRM only	0	0.0556941
A9CI29	Atu2286	UPF0114 protein Atu2286	DSM only	0	0.314956
A9CI31	Atu2284	Uncharacterized protein	10.7167	1	0.0210097
A9CI32	Atu2279	ABC transporter, nucleotide binding/ATPase protein (Proline/glycine betaine)	16.1506	1	0.0299838
A9CI33	cyaC Atu2277	Adenylate cyclase protein	DRM only	1	0.0047654
A9CI34	braC Atu2276	ABC transporter, substrate binding protein (Branched chain amino acid)	0.0477932	1	0.0428924
A9CI37	Atu2272	Uncharacterized protein	DRM only	0	0.0878243
A9CI38	Atu2267	Uncharacterized protein	DRM only	1	0.016214
A9CI41	Atu2259	MFS permease	DRM only	1	0.0164226
A9CI42	Atu2257	Uncharacterized protein	DRM only	1	0.0136797
A9CI43	moxR Atu2253	MoxR family protein	DSM only	0	0.208343
A9CI51	fbcB Atu2238	Cytochrome b	DRM only	1	0.0030298
A9CI52	Atu2235	MaoC-like domain-containing protein	DRM only	0	0.291649
A9CI55	Atu2228	GGDEF family protein	DRM only	0	0.220301
A9CI60	Atu2215	Purine nucleoside phosphorylase	DRM only	1	0.00928867
A9CI63	envZ Atu2207	Histidine kinase (EC 2.7.13.3)	DRM only	0	0.200284
A9CI64	petP Atu2205	Transcriptional regulator, MarR family	DSM only	0	0.400899
A9CI66	cspA Atu2200	Cold shock protein	0.100031	0	0.259035
A9CI70	aatA Atu2196	Aminotransferase (EC 2.6.1.-)	1.9622	1	0.00740485
A9CI72	Atu2191	Transcriptional regulator, LysR family	DRM only	0	0.229055
A9CI73	Atu2188	Oxidoreductase	1.86048	0	0.149689
A9CI74	Atu2186	Transcriptional regulator, LysR family	0.611762	0	0.547874
A9CI75	lpcC Atu2183	Lipopolysaccharide core biosynthesis mannosyltransferase	8.29307	1	0.0208316
A9CI76	Atu2180	Type-4 uracil-DNA glycosylase (EC 3.2.2.27)	DRM only	0	0.248695
A9CI78	Atu2175	Uncharacterized protein	DRM only	0	0.10968
A9CI79	Atu2169	Uncharacterized protein	DRM only	0	0.13541
A9CI80	dnaG Atu2168	DNA primase (EC 2.7.7.101)	DRM only	0	0.154714
A9CI81	Atu2165	Bacteriophytochrome protein	0.71667	0	0.730903
A9CI83	Atu2163	Uncharacterized protein	0.672558	0	0.198977
A9CI84	pp26 Atu2162	Periplasmic immunogenic protein	DSM only	0	0.0741797
A9CI86	tphA Atu2154	MFS permease	DRM only	0	0.0618024
A9CI87	Atu2153	ABC transporter, nucleotide binding/ATPase protein	DRM only	0	0.226981
A9CI89	Atu2150	ABC transporter, nucleotide binding/ATPase protein	8.87338	1	0.000493471
A9CI90	Atu2147	ABC transporter, substrate binding protein	DSM only	0	0.12837
A9CI92	glnA Atu2142	Glutamine synthetase	0.116284	1	0.0245897
A9CI93	Atu2139	Aldehyde dehydrogenase	DRM only	0	0.117119
A9CI94	Atu2137	Uncharacterized protein	DSM only	0	0.338733
A9CI98	Atu2129	Uncharacterized protein	DRM only	0	0.22384
A9CI99	Atu2124	Transcriptional regulator, ArsR family	4.12312	0	0.449391
A9CIA1	Atu2120	O-methyltransferase	DRM only	0	0.301357
A9CIA2	Atu2119	Uncharacterized protein	DSM only	1	0.040769
A9CIA4	Atu2113	N-acetylmuramoyl-L-alanine amidase	DRM only	0	0.183628
A9CIA6	pbpB1 Atu2100	Penicillin binding protein 2	DRM only	0	0.380745
A9CIA7	murF Atu2098	UDP-N-acetylmuramoyl-tripeptide--D-alanyl-D-alanine ligase (EC 6.3.2.10) (D-alanyl-D-alanine-adding enzyme)	6.68519	0	0.223368
A9CIA9	Atu2090	ABC transporter, membrane spanning protein (Sugar)	DRM only	1	0.00504889
A9CIB0	ftsQ Atu2088	Cell division protein FtsQ	1.4011	0	0.729885
A9CIB1	ftsZ2 ftsZ Atu2086	Cell division protein FtsZ	4.55145	1	0.0202162
A9CIB2	recN Atu2083	DNA repair protein RecN (Recombination protein N)	1.95909	1	0.0220838
A9CIB3	ligA Atu2082 AGR_C_3775	DNA ligase (EC 6.5.1.2) (Polydeoxyribonucleotide synthase [NAD(+)])	0.551611	0	0.27809
A9CIC0	sco1 Atu2073	Membrane protein	DRM only	0	0.0530862
A9CIC1	Atu2070	Aminopeptidase P	DSM only	0	0.370121
A9CIC6	Atu2054	AcrB/AcrD/AcrF family protein	DRM only	0	0.638832
A9CIC7	Atu2052	Uncharacterized protein	1.29874	0	0.81975
A9CIC9	hflC Atu2044	Protein HflC	8.22639	1	0.00228691
A9CID3	ilvH Atu2035	Acetolactate synthase (EC 2.2.1.6)	2.14563	0	0.146385
A9CID7	Atu2021	Transcriptional regulator, AraC family	DRM only	1	0.00895173
A9CID8	Atu2020	Transcriptional regulator, TetR family	DSM only	0	0.35381
A9CIE0	Atu2016	D-ribose pyranase (EC 5.4.99.62)	DSM only	0	0.329906
A9CIE1	Atu2015	Aminotransferase	10.7511	1	0.000981992
A9CIE2	Atu2014	ABC transporter, substrate binding protein	DRM only	0	0.183527
A9CIE4	Atu2012	ABC transporter, nucleotide binding/ATPase protein	DRM only	0	0.183527
A9CIE8	Atu1999	NAD(P)-bd_dom domain-containing protein	DSM only	0	0.28074
A9CIF1	Atu1985	Two component response regulator	DRM only	0	0.0789333
A9CIF4	Atu1979	Cyclopropane-fatty-acyl-phospholipid synthase	DSM only	0	0.617017
A9CIF5	Atu1978	Uncharacterized protein	DRM only	0	0.202794
A9CIF8	nusG Atu1961	Transcription termination/antitermination protein NusG	0.508021	1	0.000626895
A9CIG1	rpsN Atu1933 AGR_C_3535	30S ribosomal protein S14	0.934834	0	0.818136
A9CIG3	Atu1914	Replication-associated recombination protein A	10.2183	0	0.0780376
A9CIG6	Atu1907	ABC transporter, nucleotide binding/ATPase protein	DRM only	0	0.191389
A9CIG7	Atu1906	Transport permease protein	DRM only	0	0.229055
A9CIH4	Atu1893	Uncharacterized protein	DRM only	1	0.0082692
A9CIH5	cobS Atu1891	Adenosylcobinamide-GDP ribazoletransferase (EC 2.7.8.26) (Cobalamin synthase) (Cobalamin-5'-phosphate synthase)	DRM only	0	0.199756
A9CIH6	dgk Atu1889	Diacylglycerol kinase (EC 2.7.1.107)	DRM only	1	0.0468695
A9CIH7	Atu1888	Histidine kinase (EC 2.7.13.3)	0.0608985	0	0.177761
A9CIH8	Atu1885	Transcriptional regulator, AsnC family	DSM only	0	0.221178
A9CII2	Atu1880	ABC transporter, membrane spanning protein (Amino acid)	DRM only	0	0.186401
A9CII3	Atu1879	ABC transporter, substrate binding protein (Amino acid)	DSM only	0	0.183679
A9CII4	Atu1877	OmpA family protein	0.100995	0	0.145954
A9CII5	Atu1875	Carbohydrate kinase	DRM only	0	0.183628
A9CII7	gst Atu1871	Glutathione S-transferase	DRM only	1	0.0341603
A9CII8	icdA Atu1870	Isocitrate dehydrogenase [NADP] (EC 1.1.1.42)	1.91291	1	0.0370189
A9CII9	Atu1862	AAA domain-containing protein	DRM only	0	0.232034
A9CIJ1	Atu1856	Inositol monophosphatase family protein	8.05722	1	0.00301329
A9CIJ3	Atu1852	Uncharacterized protein	DRM only	0	0.13839
A9CIJ4	Atu1849	Uncharacterized protein	DRM only	0	0.287842
A9CIJ5	Atu1848	Transcriptional regulator, GntR family	DRM only	0	0.291649
A9CIJ6	Atu1847	Uncharacterized protein	DRM only	0	0.183761
A9CIJ7	Atu1846	Uncharacterized protein	DRM only	1	0.017983
A9CIJ9	purB Atu1841	Adenylosuccinate lyase (ASL) (EC 4.3.2.2) (Adenylosuccinase)	0.799961	0	0.512628
A9CIK0	Atu1840	Uncharacterized protein	DRM only	0	0.410077
A9CIK1	rpe Atu1839	Ribulose-phosphate 3-epimerase (EC 5.1.3.1)	DRM only	0	0.306966
A9CIK4	Atu1833	ATP-dependent RNA helicase	2.40561	1	0.0274235
A9CIK8	nifS Atu1825	Cysteine desulfurase (EC 2.8.1.7) (Nitrogenase metalloclusters biosynthesis protein NifS)	DRM only	0	0.0556941
A9CIK9	sufC Atu1823	ABC transporter, nucleotide binding/ATPase protein	7.02683	0	0.0864733
A9CIL1	Atu1816	ABC transporter, nucleotide binding/ATPase protein	DRM only	0	0.0866818
A9CIL3	Atu1810	Uncharacterized protein	DSM only	0	0.166965
A9CIL5	cspA Atu1803	Cold shock protein	DRM only	0	0.813006
A9CIL6	gloA Atu1802	Lactoylglutathione lyase	DRM only	0	0.759896
A9CIL9	Atu1799	Uncharacterized protein	DRM only	0	0.114403
A9CIM2	ubiH Atu1794	2-octaprenyl-6-methoxyphenol hydroxylase	0.474311	1	0.0271564
A9CIM4	Atu1792	ABC transporter, nucleotide binding/ATPase protein (Sugar)	6.8696	1	0.00545427
A9CIM5	Atu1791	ABC transporter, membrane spanning protein (Sugar)	DRM only	0	0.407112
A9CIM6	Atu1790	ABC transporter, membrane spanning protein (Sugar)	DRM only	1	0.0468695
A9CIM7	Atu1785	Acetyltransferase	DSM only	0	0.271032
A9CIM8	Atu1784	Uncharacterized protein	DRM only	1	0.0138603
A9CIN2	mfd Atu1778	Transcription-repair-coupling factor (TRCF) (EC 3.6.4.-)	DSM only	0	0.54142
A9CIN4	Atu1775	Polyketide biosynthesis associated protein	0.555033	0	0.599164
A9CIN5	Atu1774	ABC transporter, substrate binding protein (Peptide)	DRM only	0	0.192572
A9CIN7	glnA Atu1770	Glutamine synthetase (EC 6.3.1.2)	0.0361276	1	0.0340814
A9CIN8	metF Atu1764	Methylenetetrahydrofolate reductase (EC 1.5.1.20)	DRM only	0	0.284111
A9CIP3	Atu1753	Rhomboid domain-containing protein	DRM only	0	0.182338
A9CIQ2	Atu1730	Usp domain-containing protein	2.9174	0	0.0527211
A9CIQ3	Atu1725	Uncharacterized protein	DRM only	0	0.161547
A9CIQ4	pcm Atu1721	L-isoaspartyl protein carboxyl methyltransferase (Protein L-isoaspartyl methyltransferase) (Protein-L-isoaspartate O-methyltransferase) (Protein-beta-aspartate methyltransferase)	0.0692247	1	0.0157479
A9CIQ8	Atu1714	Exodeoxyribonuclease III (EC 3.1.11.2)	2.80357	0	0.193524
A9CIR0	Atu1709	Glycosyl hydrolase	DRM only	0	0.247836
A9CIR3	tatC Atu1704	Sec-independent protein translocase protein TatC	DRM only	1	0.0184845
A9CIR7	kefB Atu1693	Glutathione-regulated potassium-efflux system protein	DRM only	1	0.0456531
A9CIR8	Atu1692	Putative_PNPOx domain-containing protein	DRM only	0	0.229165
A9CIS0	ppiD Atu1686	Parvulin-like PPIase (Peptidyl-prolyl cis-trans isomerase plp) (Rotamase plp)	0.689803	0	0.500454
A9CIS4	ppiB Atu1679	Peptidyl-prolyl cis-trans isomerase (PPIase) (EC 5.2.1.8)	1.28728	0	0.154696
A9CIS5	Atu1675	Transcriptional regulator	DRM only	0	0.183628
A9CIS7	adhC Atu1670	S-(hydroxymethyl)glutathione dehydrogenase (EC 1.1.1.284)	0.756675	0	0.443172
A9CIS8	Atu1663	Amidohydrolase	DRM only	0	0.0746484
A9CIT0	Atu1659	Uncharacterized protein	DSM only	0	0.569453
A9CIT3	maeB Atu1652	NADP-dependent malic enzyme	0.0524796	0	0.141776
A9CIT5	Atu1649	Metallophos domain-containing protein	6.97611	0	0.368633
A9CIT6	Atu1648	Dipeptide epimerase (EC 5.1.1.-)	DRM only	0	0.183527
A9CIT7	Atu1645	ABC transporter, substrate binding protein	3.75601	1	0.00716621
A9CIT8	Atu1644	ABC_trans_aux domain-containing protein	14.7589	1	0.000629122
A9CIU3	kefA Atu1633	Potassium efflux system KEFA	1.30264	0	0.50899
A9CIU8	gyrB parE Atu1622	DNA topoisomerase 4 subunit B (EC 5.6.2.2) (Topoisomerase IV subunit B)	7.76451	1	0.00581674
A9CIU9	Atu1621	DLH domain-containing protein	DSM only	0	0.0807649
A9CIV1	Atu1615	Uncharacterized protein	0.117473	0	0.16114
A9CIV2	gor Atu1611	Glutathione reductase (GRase) (EC 1.8.1.7)	DSM only	0	0.352357
A9CIV3	dhs Atu1610	Phospho-2-dehydro-3-deoxyheptonate aldolase (EC 2.5.1.54)	DRM only	0	0.141827
A9CIV5	map Atu1606	Methionine aminopeptidase (MAP) (MetAP) (EC 3.4.11.18) (Peptidase M)	1.45897	0	0.266552
A9CIV9	fabF Atu1597	3-oxoacyl-(Acyl-carrier-protein) synthase II	DRM only	0	0.0738424
A9CIW0	fabF Atu1596	3-oxoacyl-(Acyl-carrier-protein) synthase II	DRM only	1	0.0303252
A9CIW1	Atu1595	NADPH:quinone reductase	0.387381	1	0.0115341
A9CIW2	msbB Atu1594	Lipid A biosynthesis lauroyl acyltransferase	21.3951	1	0.0329349
A9CIW3	Atu1592	Uncharacterized protein	13.6693	1	0.033299
A9CIW4	recJ Atu1586	Single-stranded-DNA-specific exonuclease RecJ	DSM only	1	0.00619196
A9CIW5	Atu1580	ABC transporter, nucleotide binding/ATPase protein (Amino acid)	1.60834	0	0.15629
A9CIW6	Atu1579	ABC transporter, membrane spanning protein (Amino acid)	DRM only	1	0.0100704
A9CIW7	Atu1578	ABC transporter, membrane spanning protein (Amino acid)	51.5735	1	0.010118
A9CIW8	Atu1577	ABC transporter, substrate binding protein (Amino acid)	1.09202	0	0.784186
A9CIW9	metC Atu1575	Cystathionine beta lyase	0.341264	0	0.448382
A9CIX0	nah Atu1574	Salicylate hydroxylase	DRM only	1	0.0121044
A9CIX2	cyc Atu1569	Cytochrome P450	1.13384	0	0.860774
A9CIX5	yajC Atu1563	Sec translocon accessory complex subunit YajC	DRM only	1	0.0135623
A9CIY2	Atu1545	DUF1624 domain-containing protein	DRM only	0	0.0920461
A9CIY5	Atu1540	Uncharacterized protein	DRM only	0	0.903809
A9CIY7	fixO Atu1536	Cytochrome C oxidase, FixO chain	DRM only	1	0.0105638
A9CIY9	fixG Atu1530	Nitrogen fixation protein FixG	DRM only	1	0.0194493
A9CIZ1	fixI Atu1528	Nitrogen fixation protein FixI	DRM only	0	0.246416
A9CIZ2	gntZ Atu1526	6-phosphogluconate dehydrogenase, decarboxylating (EC 1.1.1.44)	0.301468	0	0.0700012
A9CIZ3	Atu1525	Uncharacterized protein	2.87074	0	0.353759
A9CIZ4	zur fur Atu1518	Ferric uptake regulation protein	1.14321	0	0.675172
A9CIZ7	Atu1509	Uncharacterized protein	DRM only	0	0.179719
A9CJ01	rlpA Atu1500	Endolytic peptidoglycan transglycosylase RlpA (EC 4.2.2.-)	DRM only	0	0.0520417
A9CJ09	Atu1480	Alkyl hydroperoxide reductase C (Peroxiredoxin) (Thioredoxin peroxidase)	0.50589	0	0.170157
A9CJ14	Atu1473	Uncharacterized protein	DRM only	0	0.222421
A9CJ20	mvrA Atu1458	Ferredoxin--NADP reductase (EC 1.18.1.2)	DRM only	0	0.892154
A9CJ21	cysI Atu1456	Sulfite reductase (NADPH) hemoprotein beta-component	DRM only	0	0.0958016
A9CJ23	ntrX Atu1448	Two component response regulator	7.22552	1	0.0106618
A9CJ24	ntrB Atu1445	Histidine kinase (EC 2.7.13.3)	DRM only	1	0.006298
A9CJ28	Atu1440	Uncharacterized protein	0.795495	0	0.808769
A9CJ30	lpdA Atu1434	Dihydrolipoyl dehydrogenase (EC 1.8.1.4)	0.308873	1	0.0147601
A9CJ31	Atu1433	Arylesterase	DRM only	0	0.303291
A9CJ32	pdhB Atu1430	Pyruvate dehydrogenase E1 component subunit beta (EC 1.2.4.1)	0.720678	0	0.186497
A9CJ35	gcvT Atu1420	Glycine cleavage system T protein, aminomethyltransferase	DSM only	0	0.34093
A9CJ41	Atu1411	ABC transporter, nucleotide binding/ATPase protein	DRM only	0	0.183761
A9CJ42	Atu1410	ABC transporter, nucleotide binding/ATPase protein	DRM only	0	0.183527
A9CJ50	Atu1397	ABC transporter, membrane spanning protein (Amino acid)	DRM only	0	0.183527
A9CJ51	Atu1396	ABC transporter, nucleotide binding/ATPase protein	DRM only	0	0.301357
A9CJ53	cisY Atu1392	Citrate synthase	0.175262	0	0.0873583
A9CJ59	lpxB Atu1386	Lipid-A-disaccharide synthase (EC 2.4.1.182)	2.01177	0	0.252819
A9CJ60	Atu1385	Uncharacterized protein	6.936	1	0.00283643
A9CJ61	omp1 bamA Atu1381	Outer membrane protein assembly factor BamA	12.0008	1	0.00987165
A9CJ64	Atu1370	Uncharacterized protein	DRM only	0	0.272767
A9CJ66	clpA Atu1364	ATP-dependent Clp protease, ATP-binding subunit	1.56499	0	0.074849
A9CJ70	Atu1351	Uncharacterized protein	3.45847	0	0.0687206
A9CJ72	Atu1348	Uncharacterized protein	0.150963	0	0.113898
A9CJ73	Atu1347	Tetracycline resistance protein, tetM/tetO subfamily	DRM only	0	0.0521643
A9CJ77	mrcA Atu1341	DD-transpeptidase (EC 2.4.1.129) (EC 3.4.16.4) (Penicillin-binding protein 1A) (Penicillin-insensitive transglycosylase) (Penicillin-sensitive transpeptidase) (Peptidoglycan TGase)	6.50916	1	0.000372038
A9CJ78	fabG Atu1338	3-oxoacyl-(Acyl carrier protein) reductase	DSM only	1	0.0049027
A9CJ83	accC Atu1330	Biotin carboxylase (EC 6.3.4.14) (EC 6.4.1.2)	2.57914	1	0.0444406
A9CJ84	Atu1327	NADH-ubiquinone oxidoreductase	5.01473	1	0.00050923
A9CJ88	Atu1317 AGR_C_2426	UPF0173 metal-dependent hydrolase Atu1317	DRM only	1	0.0439889
A9CJ89	Atu1311	Acetyltransferase	0.294986	0	0.365593
A9CJ90	acd Atu1310	Acyl-CoA dehydrogenase	DSM only	0	0.137552
A9CJ91	pyrC Atu1307	Dihydroorotase	DSM only	0	0.104956
A9CJ93	topA Atu1304	DNA topoisomerase 1 (EC 5.6.2.1) (DNA topoisomerase I)	0.632215	0	0.209989
A9CJ94	rnr Atu1303	Ribonuclease R (RNase R) (EC 3.1.13.1)	0.0388788	1	0.0251038
A9CJ96	Atu1301	Nudix hydrolase domain-containing protein	DRM only	0	0.45514
A9CJ99	dnaE Atu1292	DNA polymerase III subunit alpha (EC 2.7.7.7)	6.35447	0	0.120518
A9CJA0	Atu1289	ABC transporter, membrane spanning protein	DRM only	1	0.030935
A9CJA2	nuoM Atu1282	NADH dehydrogenase I chain M	DRM only	1	0.0115036
A9CJA3	nuoL Atu1281	NADH:ubiquinone reductase (H(+)-translocating) (EC 7.1.1.2)	DRM only	1	0.00789049
A9CJA4	nuoK Atu1280 AGR_C_2359	NADH-quinone oxidoreductase subunit K (EC 7.1.1.-) (NADH dehydrogenase I subunit K) (NDH-1 subunit K)	DRM only	0	0.0918219
A9CJA5	nuoJ Atu1279	NADH-quinone oxidoreductase subunit J (EC 7.1.1.-)	DRM only	1	0.0295229
A9CJA6	nuoF Atu1275	NADH-quinone oxidoreductase subunit F (EC 7.1.1.-)	0.522394	0	0.0676355
A9CJA7	nuoE Atu1274	NADH ubiquinone oxidoreductase chain E	0.19063	1	0.019399
A9CJA9	nuoD Atu1272 AGR_C_2346	NADH-quinone oxidoreductase subunit D (EC 7.1.1.-) (NADH dehydrogenase I subunit D) (NDH-1 subunit D)	1.24821	0	0.41966
A9CJB1	nuoC Atu1270 AGR_C_2342	NADH-quinone oxidoreductase subunit C (EC 7.1.1.-) (NADH dehydrogenase I subunit C) (NDH-1 subunit C)	1.47128	1	0.00451008
A9CJB2	nuoB Atu1269 AGR_C_2341	NADH-quinone oxidoreductase subunit B (EC 7.1.1.-) (NADH dehydrogenase I subunit B) (NDH-1 subunit B)	0.881629	0	0.153203
A9CJB4	hupA Atu1262	Histone-like protein	0.137215	0	0.0886226
A9CJB5	lon Atu1261	Lon protease (EC 3.4.21.53) (ATP-dependent protease La)	1.28239	0	0.208564
A9CJB9	cysD Atu1251	O-acetylhomoserine sulfhydrylase	0.347804	0	0.466032
A9CJC4	exoP Atu1239	Exopolysaccharide production protein	DRM only	0	0.236337
A9CJC5	gumB Atu1238	Polysaccharide export protein	DRM only	1	0.0217899
A9CJC7	Atu1222	Uncharacterized protein	DSM only	0	0.0606334
A9CJC9	phrA Atu1218	Deoxyribodipyrimidine photo-lyase (EC 4.1.99.3) (Cyclobutane pyrimidine dimer photolyase) (CPD photolyase) (DNA photolyase PhrA) (Photoreactivating enzyme PhrA)	DRM only	0	0.229055
A9CJD0	cysK Atu1217	Cysteine synthase	2.53775	1	0.0215427
A9CJD2	Atu1215	Thiosulfate sulfurtransferase	3.35225	0	0.0848775
A9CJD4	cpdB Atu1210	2',3'-cyclic-nucleotide 2'-phosphodiesterase/3'-nucleotidase (EC 3.1.3.6) (EC 3.1.4.16)	DRM only	0	0.516705
A9CJD5	Atu1209	Transcriptional regulator, LysR family	DSM only	0	0.202542
A9CJE2	Atu1196	Naphthalene 1,2-dioxygenase	DRM only	0	0.116952
A9CJE3	Atu1195	Heavy-metal transporting P-type ATPase	DRM only	0	0.0893515
A9CJE8	Atu1173	MFS permease	DRM only	0	0.265856
A9CJF0	Atu1164	Uncharacterized protein	2.08764	1	0.0393312
A9CJF2	Atu1160	RDD domain-containing protein	DRM only	0	0.174728
A9CJF3	parC Atu1158	DNA topoisomerase 4 subunit A (EC 5.6.2.2) (Topoisomerase IV subunit A)	1.85389	0	0.361654
A9CJF4	Atu1157	Uncharacterized protein	0.157662	0	0.0641998
A9CJF9	ppx Atu1145	Exopolyphosphatase (EC 3.6.1.11)	0.396289	1	0.0442458
A9CJG0	Atu1143	Uncharacterized protein	DRM only	0	0.336753
A9CJG1	Atu1142	Permease	DRM only	0	0.14141
A9CJG3	Atu1134	Uncharacterized protein	DRM only	1	0.0108766
A9CJG4	Atu1132	Glutathione S-transferase related protein	DSM only	1	0.00579698
A9CJG5	pgsA Atu1128	Phosphatidylglycerophosphate synthase	DRM only	1	0.00715284
A9CJG7	ligE Atu1121	Lignin degradation protein	DRM only	1	0.0219813
A9CJG9	nwsB Atu1116	Two component response regulator	0.864961	0	0.860082
A9CJH0	Atu1108	Uncharacterized protein	DRM only	0	0.0809085
A9CJH1	Atu1107	Uncharacterized protein	DRM only	1	0.031843
A9CJH2	ostA lptD Atu1106	LPS-assembly protein LptD	38.0471	1	0.00549234
A9CJH3	Atu1105	Uncharacterized protein	0.0899453	1	0.0156764
A9CJH7	fabG Atu1095	3-oxoacyl-[acyl-carrier-protein] reductase (EC 1.1.1.100)	0.0275893	1	0.0340192
A9CJH8	fabD Atu1094	Malonyl CoA-acyl carrier protein transacylase (EC 2.3.1.39)	DSM only	0	0.217077
A9CJH9	Atu1089	Uncharacterized protein	DRM only	1	0.0125298
A9CJI0	dnaC Atu1084	Replicative DNA helicase (EC 3.6.4.12)	3.62594	1	0.047489
A9CJI4	radA Atu1077	DNA repair protein RadA	6.95016	1	0.00546252
A9CJI5	purF Atu1075	Amidophosphoribosyltransferase (ATase) (EC 2.4.2.14) (Glutamine phosphoribosylpyrophosphate amidotransferase) (GPATase)	0.714199	0	0.568815
A9CJJ2	Atu1054	Uncharacterized protein	DRM only	0	0.190575
A9CJJ3	gcvT Atu1053	Glycine cleavage system T protein, aminomethyltransferase	DSM only	0	0.794209
A9CJJ5	Atu1050	Uncharacterized protein	DRM only	1	0.00633011
A9CJJ6	Atu1049	ZinT domain-containing protein	0.199266	1	0.0308634
A9CJJ9	Atu1046	ABC transporter, substrate binding protein	DRM only	0	0.0640289
A9CJK0	Atu1045	Uncharacterized protein	0.901612	0	0.914252
A9CJK1	Atu1044	Uncharacterized protein	DRM only	1	0.0282461
A9CJK6	sipf Atu1034	Signal peptidase I (EC 3.4.21.89)	8.39897	1	0.000468457
A9CJK8	mcpV Atu1027	Methyl-accepting chemotaxis protein	DRM only	0	0.408925
A9CJK9	Atu1021	Porin	35.5257	1	0.00400912
A9CJL0	Atu1020	Porin	15.8127	1	0.000121376
A9CJL2	Atu1014	Aldolase	DRM only	0	0.268035
A9CJL3	Atu1013	Ferredoxin reductase	DRM only	0	0.0991273
A9CJL4	Atu1001	DAGKc domain-containing protein	DRM only	1	0.0147222
A9CJL5	mgtE Atu0999	Magnesium transporter MgtE	DRM only	0	0.0528664
A9CJL7	Atu0996	Zinc-type alcohol dehydrogenase-like protein	DRM only	0	0.0740764
A9CJL8	Atu0994	Electron transfer flavoprotein-ubiquinone oxidoreductase (ETF-QO) (EC 1.5.5.1)	6.95228	1	0.0348528
A9CJM1	Atu0991	Cation efflux system component	DRM only	0	0.226981
A9CJM2	Atu0987	Type-4 uracil-DNA glycosylase (EC 3.2.2.27)	DRM only	0	0.303291
A9CJM4	pepN Atu0984	Aminopeptidase N (EC 3.4.11.2)	DRM only	0	0.149387
A9CJM5	Atu0982	Histidine kinase (EC 2.7.13.3)	DRM only	1	0.0307644
A9CJM6	ragB Atu0979	Histidine kinase (EC 2.7.13.3)	DRM only	0	0.0783077
A9CJM7	ragA Atu0978	Two component response regulator	DRM only	0	0.415944
A9CJM8	dop Atu0977	Periplasmic serine endoprotease DegP-like (EC 3.4.21.107)	0.363698	1	0.00442221
A9CJN0	cycH Atu0973	CycH protein	DRM only	1	0.0149822
A9CJN1	Atu0971	Histidine kinase (EC 2.7.13.3)	DRM only	0	0.0720687
A9CJN3	Atu0967	Uncharacterized protein	DRM only	0	0.703408
A9CJN5	Atu0965	Uncharacterized protein	DRM only	1	0.0341603
A9CJN9	gp35 Atu0956	Phage prohead protease	DRM only	0	0.22384
A9CJP2	Atu0950	Uncharacterized protein	DRM only	0	0.0727879
A9CJP7	Atu0937	Copper transporting ATPase	7.14004	1	0.0150127
A9CJP9	Atu0931	Penicillin-insensitive transglycosylase (EC 2.4.1.129) (Peptidoglycan TGase)	DRM only	1	0.0392229
A9CJQ2	Atu0926	DUF1214 domain-containing protein	DRM only	0	0.0546259
A9CJQ7	ros Atu0916	Transcriptional regulator	1.21523	0	0.705207
A9CJR6	Atu0904	Universal stress protein	0.662129	0	0.625373
A9CJS0	ptrB Atu0897	Protease II	DRM only	0	0.523566
A9CJS8	Atu0882	Uncharacterized protein	DRM only	0	0.271366
A9CJT6	Atu0860	DUF853 domain-containing protein	0.99723	0	0.946732
A9CJU3	Atu0841	Peptidase_S9 domain-containing protein	0.660217	0	0.615248
A9CJU4	gst Atu0836	Glutathione-S-transferase	DRM only	0	0.502511
A9CJU5	gst Atu0835	Glutathione S-transferase	DSM only	0	0.938683
A9CJU7	Atu0826	Uncharacterized protein	DRM only	0	0.229055
A9CJU9	cysT Atu0821	Sulfate transport system permease protein CysT	DRM only	0	0.35706
A9CJV0	Atu0820	ABC transporter, substrate binding protein (Sulfate)	DRM only	0	0.323649
A9CJV2	Atu0813	Uncharacterized protein	DRM only	1	0.0410519
A9CJV3	Atu0810	Uncharacterized protein	DRM only	0	0.275174
A9CJV4	Atu0806	Uncharacterized protein	DRM only	0	0.0984825
A9CJV6	Atu0800	Thioredoxin domain-containing protein	DSM only	0	0.0921548
A9CJV7	mutY Atu0798	Adenine DNA glycosylase (EC 3.2.2.31)	DRM only	0	0.199085
A9CJV8	Atu0797	Hydrolase	DRM only	0	0.079072
A9CJW3	Atu0790	Uncharacterized protein	DRM only	0	0.247836
A9CJW4	Atu0788	Uncharacterized protein	DRM only	1	0.0255767
A9CJW5	thrC Atu0787	Threonine synthase (EC 4.2.3.1)	0.289992	0	0.26359
A9CJW6	rimJ Atu0785	Ribosomal-protein (S5)-alanine N-acetyltransferase	DSM only	0	0.0965518
A9CJW7	Atu0784	Uncharacterized protein	DRM only	1	0.0206141
A9CJW9	Atu0779	Glutathione-dependent peroxiredoxin (EC 1.11.1.27)	4.33761	1	0.0284541
A9CJX1	surf1 Atu0773	SURF1-like protein	DRM only	1	0.00239951
A9CJX2	coxC Atu0771	Cytochrome aa3 subunit 3 (EC 7.1.1.9) (Cytochrome c oxidase polypeptide III)	DRM only	1	0.00186238
A9CJX9	fabI Atu0757	Enoyl-[acyl-carrier-protein] reductase [NADH] (EC 1.3.1.9)	3.93682	1	0.0159563
A9CJY0	gpmB Atu0756	Phosphoglycerate mutase	DRM only	0	0.194186
A9CJY1	ribA ribB Atu0753	3,4-dihydroxy-2-butanone 4-phosphate synthase (DHBP synthase) (EC 4.1.99.12)	DRM only	0	0.238347
A9CJY2	Atu0752	Uncharacterized protein	DRM only	1	0.0376929
A9CJY4	bioY Atu0749	Biotin transporter	DRM only	1	0.0475071
A9CJZ1	Atu0736	Hemolysin	DRM only	0	0.195848
A9CJZ3	Atu0733	Enoyl-CoA hydratase/isomerase	DRM only	1	0.0141378
A9CJZ4	mmgC Atu0732	Acyl-CoA dehydrogenase	1.00695	0	0.993322
A9CJZ5	Atu0728	Lectin-like protein BA14k	DRM only	1	0.0325783
A9CJZ6	Atu0727	Ferredoxin I	DRM only	0	0.149285
A9CK00	Atu0719	Transacetylase	DRM only	0	0.183527
A9CK01	atpF1 Atu0717 AGR_C_1301	ATP synthase subunit b 1 (ATP synthase F(0) sector subunit b 1) (ATPase subunit I 1) (F-type ATPase subunit b 1) (F-ATPase subunit b 1)	4.14352	1	0.0201663
A9CK02	atpC atpE Atu0715	ATP synthase subunit c (ATP synthase F(0) sector subunit c) (F-type ATPase subunit c) (F-ATPase subunit c) (Lipid-binding protein)	0.421427	0	0.356866
A9CK03	atpB Atu0714 AGR_C_1295	ATP synthase subunit a (ATP synthase F0 sector subunit a) (F-ATPase subunit 6)	DRM only	0	0.156708
A9CK04	atpI Atu0713	ATP synthase protein I	DRM only	1	0.0329203
A9CK05	corA Atu0710	Magnesium/cobalt transport protein	DRM only	1	0.00761951
A9CK06	nrt Atu0708	ABC transporter, nucleotide binding/ATPase protein	DRM only	0	0.265856
A9CK07	fabG Atu0705	3-oxoacyl-(Acyl carrier protein) reductase	DRM only	0	0.183527
A9CK08	kdgA Atu0703	Keto-hydroxyglutarate-aldolase/keto-deoxy-phosphogluconate aldolase	DRM only	0	0.30924
A9CK10	Atu0696	Phosphatase	DRM only	0	0.230662
A9CK11	kdtA Atu0695	3-deoxy-D-manno-octulosonic acid transferase (Kdo transferase) (EC 2.4.99.12) (Lipid IV(A) 3-deoxy-D-manno-octulosonic acid transferase)	0.586663	0	0.271335
A9CK12	Atu0694	Inositol monophosphatase family protein	DRM only	0	0.298351
A9CK14	Atu0690	Uncharacterized protein	DRM only	0	0.21533
A9CK15	rluB Atu0689	Pseudouridine synthase (EC 5.4.99.-)	1.55097	0	0.316233
A9CK23	Atu0673	Uncharacterized protein	DRM only	0	0.21207
A9CK25	glcF Atu0667	Glycolate oxidase iron-sulfur subunit	5.21391	1	0.0180175
A9CK27	Atu0663	Uncharacterized protein	DRM only	1	0.0417284
A9CK28	Atu0662	Transcriptional regulator, GntR family	DRM only	0	0.164389
A9CK31	Atu0659	NTP pyrophosphohydrolase, MutT family	DSM only	1	0.00667514
A9CK32	pit Atu0658	Phosphate transporter	DRM only	0	0.12015
A9CK34	Atu0654	Transcriptional regulator, LysR family	DRM only	0	0.165538
A9CK36	ubiA Atu0651	4-hydroxybenzoate octaprenyltransferase (EC 2.5.1.39) (4-HB polyprenyltransferase)	DRM only	0	0.0988827
A9CK37	Atu0650	Uncharacterized protein	23.6675	1	0.038621
A9CK38	cfa Atu0649	Cyclopropane-fatty-acyl-phospholipid synthase	0.75992	0	0.0867298
A9CK39	glyS Atu0644 AGR_C_1144	Glycine--tRNA ligase beta subunit (EC 6.1.1.14) (Glycyl-tRNA synthetase beta subunit) (GlyRS)	0.631694	0	0.42046
A9CK41	Atu0641	Uncharacterized protein	2.33467	1	0.00176814
A9CK42	Atu0638	Uncharacterized protein	DRM only	0	0.22384
A9CK46	Atu0628	Histidine kinase (EC 2.7.13.3)	DSM only	0	0.318127
A9CK47	adhP Atu0626	Alcohol dehydrogenase	5.05293	0	0.166002
A9CK48	Atu0621	MFS permease	DRM only	0	0.0740764
A9CK50	potG potA Atu0610	Spermidine/putrescine import ATP-binding protein PotA (EC 7.6.2.11)	7.61971	0	0.059944
A9CK51	potF Atu0609	Putrescine-binding periplasmic protein	DSM only	1	0.00622057
A9CK52	Atu0608	Transcriptional regulator	DRM only	0	0.413965
A9CK54	Atu0605	Transcriptional regulator, LysR family	DRM only	0	0.230662
A9CK55	ordL Atu0601	Oxidoreductase	11.2864	1	0.00742111
A9CK56	edd Atu0598	Phosphogluconate dehydratase (EC 4.2.1.12)	0.779272	0	0.701663
A9CK57	aglK Atu0595	ABC transporter, nucleotide binding/ATPase protein	0.958108	0	0.75661
A9CK58	aglG Atu0593	ABC transporter, membrane spanning protein	DRM only	0	0.241308
A9CK60	Atu0588	Uncharacterized protein	0.805747	0	0.730754
A9CK66	flgL Atu0576	Flagellin	2.92022	1	0.0180719
A9CK67	flgK Atu0575	Flagellar hook-associated protein 1	13.9267	1	0.000525572
A9CK68	flgE Atu0574	Flagellar hook protein FlgE	0.0109928	1	0.0116665
A9CK75	luxR Atu0524	Transcriptional regulator, LuxR family	DRM only	0	0.0571514
A9CK78	phaC Atu0511	pH adaption potassium efflux system protein	DRM only	0	0.0739573
A9CK81	fadB Atu0503	3-hydroxyacyl-CoA dehydrogenase (EC 1.1.1.35)	0.0579172	0	0.0855428
A9CK82	Atu0502	Acetyl-CoA acetyltransferase	0.299051	0	0.200216
A9CK83	acd Atu0501	Acyl-CoA dehydrogenase	DRM only	0	0.955413
A9CK85	pyrD Atu0486 AGR_C_861	Dihydroorotate dehydrogenase (quinone) (EC 1.3.5.2) (DHOdehase) (DHOD) (DHODase) (Dihydroorotate oxidase)	DRM only	1	0.0388993
A9CK86	c1 Atu0483	Bacteriophage repressor protein C1	0.605608	0	0.482201
A9CK87	Atu0482	Chitooligosaccharide deacetylase (Nodulation protein B)	DRM only	0	0.230662
A9CK91	Atu0458	Uncharacterized protein	DRM only	1	0.0474478
A9CK96	Atu0447	Uncharacterized protein	1.6835	0	0.475554
A9CK99	Atu0437	Uncharacterized protein	DRM only	0	0.183527
A9CKA0	Atu0436	DNA helicase (EC 3.6.4.12)	0.107035	0	0.120477
A9CKA2	metZ Atu0432	O-succinylhomoserine sulfhydrylase (OSH sulfhydrylase) (OSHS sulfhydrylase) (EC 2.5.1.-)	1.4131	0	0.743869
A9CKA4	phoU Atu0424	Phosphate-specific transport system accessory protein PhoU	2.10979	0	0.116167
A9CKA5	pstA Atu0422	Phosphate transport system permease protein PstA	DRM only	0	0.0559006
A9CKA6	pstC Atu0421	Phosphate transport system permease protein	DRM only	1	0.0359976
A9CKA7	Atu0420	ABC transporter, substrate binding protein (Phosphate)	DSM only	1	0.0480835
A9CKA8	Atu0418	Polyphosphate:ADP phosphotransferase (EC 2.7.4.1) (Polyphosphate kinase PPK2)	11.5224	0	0.113068
A9CKB2	fadD Atu0405	Long-chain-fatty-acid-CoA-ligase	0.122996	0	0.053345
A9CKB6	Atu0394	ABC transporter, substrate binding protein (Sugar)	DRM only	0	0.183761
A9CKB9	Atu0388	Histidine kinase (EC 2.7.13.3)	6.55776	0	0.230064
A9CKC3	hspC Atu0375	Small heat shock protein	0.660987	0	0.313218
A9CKC4	dapE Atu0370 AGR_C_647	Succinyl-diaminopimelate desuccinylase (SDAP desuccinylase) (EC 3.5.1.18) (N-succinyl-LL-2,6-diaminoheptanedioate amidohydrolase)	DSM only	0	0.337375
A9CKC6	Atu0365	DNA recombination protein RmuC homolog	DRM only	0	0.548274
A9CKC8	metK Atu0362	Methionine adenosyltransferase (EC 2.5.1.6)	1.76835	1	0.0433495
A9CKC9	plsC Atu0355	1-acyl-sn-glycerol-3-phosphate acyltransferase	DRM only	0	0.0728869
A9CKD1	Atu0353	Acetyltransferase	DRM only	0	0.0534083
A9CKD3	Atu0351	Nfu_N domain-containing protein	1.65291	0	0.178523
A9CKD4	Atu0348	VOC domain-containing protein	DRM only	0	0.183527
A9CKD6	Atu0340	SAM dependent methyltransferase	1.54258	0	0.16137
A9CKD7	Atu0339	Uncharacterized protein	5.41424	1	0.0112483
A9CKD8	sppA Atu0337	Proteinase IV	DRM only	1	0.00191038
A9CKD9	Atu0333	Lipopolysaccharide export system ATP-binding protein LptB	2.41349	1	0.0206214
A9CKE1	aarF Atu0319	Ubiquinone biosynthesis protein	57.4868	1	0.00136525
A9CKE4	cysK Atu0312	Cysteine synthase (EC 2.5.1.47)	0.525456	1	0.0162748
A9CKE9	Atu0300	Methyltransferase	4.43139	0	0.141091
A9CKF2	Atu0293	Glutathione S-transferase	0.139672	1	0.00155984
A9CKF4	Atu0291	Epimerase domain-containing protein	DSM only	0	0.282041
A9CKF6	sun Atu0289	Sun protein	0.641545	0	0.598477
A9CKF8	Atu0286	Peptidase_M75 domain-containing protein	1.10374	0	0.924722
A9CKG1	Atu0283	4HBT domain-containing protein	DRM only	0	0.0756953
A9CKG8	ampS Atu0274	Aminopeptidase	DSM only	0	0.139644
A9CKH4	Atu0263	Oxidoreductase	DRM only	1	0.0385215
A9CKH5	Atu0262	Acetyltransferase	DRM only	1	0.0446321
A9CKH6	Atu0261	Transcriptional regulator, LysR family	DRM only	0	0.220301
A9CKH7	infC Atu0254	Translation initiation factor 3	0.0882052	1	0.0455826
A9CKH9	Atu0251	Rubrerythrin domain-containing protein	7.4617	1	0.00283832
A9CKI0	Atu0249	ABC transporter, substrate binding protein (Sugar)	DSM only	1	0.0093482
A9CKI1	Atu0248	Transcriptional regulator, AraC family	DRM only	0	0.321952
A9CKI2	Atu0247	AB hydrolase-1 domain-containing protein	DRM only	1	0.000222978
A9CKI3	Atu0246	Acetyltransferase	DRM only	0	0.324938
A9CKI9	Atu0236	Uncharacterized protein	DRM only	0	0.220301
A9CKJ5	ctpD Atu0221	Component of type IV pilus	DRM only	0	0.183761
A9CKJ6	ctpE Atu0220	Components of type IV pilus	DRM only	1	0.000275768
A9CKJ9	Atu0215	TPR_REGION domain-containing protein	DRM only	0	0.177524
A9CKK0	Atu0214	Leucine aminopeptidase	0.0860227	0	0.138488
A9CKK1	Atu0211	Uncharacterized protein	DSM only	0	0.265143
A9CKK4	mmsA Atu0205	Methylmalonate-semialdehyde dehydrogenase	0.0379251	0	0.0921739
A9CKK6	aau3 Atu0201	Uncharacterized protein	3.29084	1	0.0215416
A9CKK9	Atu0197	ABC transporter, nucleotide binding/ATPase protein (Proline/glycine/betaine)	DRM only	0	0.152614
A9CKL1	ordL Atu0194	Oxidoreductase	8.01735	0	0.0508388
A9CKL2	Atu0190	ABC transporter, nucleotide binding/ATPase protein (Peptide)	6.82229	1	0.00244718
A9CKL3	Atu0188	ABC transporter, membrane spanning protein (Peptide)	DRM only	1	0.0195482
A9CKL4	Atu0187	ABC transporter, substrate binding protein (Peptide)	DSM only	1	0.00190041
A9CKL5	mepA Atu0186	Penicillin-insensitive murein endopeptidase	DSM only	0	0.0510597
A9CKM4	phnM Atu0169	Amidohydro-rel domain-containing protein	21.8865	1	0.00586253
A9CKM5	phnN gmk Atu0168 AGR_C_277	Ribose 1,5-bisphosphate phosphokinase PhnN (EC 2.7.4.23) (Ribose 1,5-bisphosphokinase)	DRM only	1	0.0130701
A9CKM6	Atu0167	Transcriptional regulator, AraC family	DRM only	1	0.0164283
A9CKM7	Atu0164	Putative malate dehydrogenase	DRM only	1	0.0119871
A9CKN2	cysJ Atu0146	Sulfite reductase [NADPH] flavoprotein alpha-component (SiR-FP) (EC 1.8.1.2)	DRM only	1	0.0407063
A9CKN3	Atu0143	MFS permease	DRM only	0	0.394951
A9CKN4	cyoB Atu0141	Cytochrome O ubiquinol oxidase subunit I	1.30236	0	0.336048
A9CKN5	cyoC Atu0140	Cytochrome bo(3) ubiquinol oxidase subunit 3 (Cytochrome o ubiquinol oxidase subunit 3) (Oxidase bo(3) subunit 3) (Ubiquinol oxidase polypeptide III) (Ubiquinol oxidase subunit 3)	DRM only	1	0.0128931
A9CKN7	Atu0129	ABC transporter, membrane spanning protein (Sugar/ribonucleotide)	DRM only	1	0.0439141
A9CKN8	Atu0128	ABC transporter, membrane spanning protein (Sugar/ribonucleotide)	DRM only	1	0.00895477
A9CKN9	Atu0126	Membrane lipoprotein	DSM only	0	0.453028
A9CKP5	polA Atu0110	DNA polymerase I (EC 2.7.7.7)	3.56525	1	0.0141424
A9CKP8	kdsB Atu0100 AGR_C_152	3-deoxy-manno-octulosonate cytidylyltransferase (EC 2.7.7.38) (CMP-2-keto-3-deoxyoctulosonic acid synthase) (CKS) (CMP-KDO synthase)	0.748182	0	0.716409
A9CKP9	Atu0098	NAD(+) diphosphatase (EC 3.6.1.22)	DRM only	0	0.0918219
A9CKQ1	dnaX Atu0096	DNA polymerase III subunit gamma/tau (EC 2.7.7.7)	16.6605	1	0.0200638
A9CKQ3	mltB Atu0092	Lytic murein transglycosylase	DSM only	0	0.102123
A9CKQ5	nusA Atu0089	Transcription termination/antitermination protein NusA	1.05332	0	0.692971
A9CKQ6	Atu0088	YlxR domain-containing protein	DRM only	0	0.108513
A9CKQ7	pnp Atu0082 AGR_C_124	Polyribonucleotide nucleotidyltransferase (EC 2.7.7.8) (Polynucleotide phosphorylase) (PNPase)	0.16039	1	0.0237242
A9CKQ8	Atu0080	Permease	DRM only	0	0.240212
A9CKQ9	Atu0077	D-isomer specific 2-hydroxyacid dehydrogenases family protein	0.227424	1	0.0304878
A9CKR1	Atu0075	N-acetyltransferase domain-containing protein	DRM only	0	0.129043
A9CKR2	Atu0072	Uncharacterized protein	5.07766	1	0.0462932
A9CKR4	Atu0066	Putative kinase	DRM only	0	0.144352
A9CKR5	frcA Atu0065	ABC transporter, nucleotide binding/ATPase protein (Sugar)	8.44835	1	2.92763e-05
A9CKR6	frcC Atu0064	ABC transporter, membrane spanning protein (Sugar)	23.4911	1	0.0100152
A9CKR7	frcB Atu0063	ABC transporter, substrate binding protein (Sugar)	0.0651894	1	0.0416035
A9CKS0	actR Atu0050	Two component response regulator	0.20975	1	0.0240453
A9CKS1	Atu0048	YkuD domain-containing protein	5.17629	1	0.00798648
A9CKS2	Atu0046	Uncharacterized protein	DSM only	1	0.00328813
A9CKS6	Atu0027	Histidine kinase (EC 2.7.13.3)	10.6644	0	0.157984
A9CKS9	Atu0024	PDDEXK_1 domain-containing protein	DSM only	0	0.265143
A9CKT0	accD Atu0020 AGR_C_32	Acetyl-coenzyme A carboxylase carboxyl transferase subunit beta (ACCase subunit beta) (Acetyl-CoA carboxylase carboxyltransferase subunit beta) (EC 2.1.3.15)	1.08241	0	0.770903
A9CKT1	Atu0016	Uncharacterized protein	DRM only	0	0.301357
A9CKT2	depA Atu0015	Intracellular PHB depolymerase	DRM only	0	0.271037
A9CKT5	gyrB Atu0012	DNA gyrase subunit B (EC 5.6.2.2)	2.17296	0	0.165741
A9CKT7	Atu0010	Smr domain-containing protein	DRM only	0	0.239488
A9CKT8	mltA Atu0009	Murein hydrolase A (EC 4.2.2.n1)	DRM only	0	0.0566403
A9CKT9	fxsA Atu0007	Uncharacterized protein	DRM only	1	0.0159729
A9CKU0	dnaQ Atu0005	DNA polymerase III subunit epsilon (EC 2.7.7.7)	DRM only	1	0.0243017
A9CKU1	Atu6162	Uncharacterized protein	0.757285	0	0.465497
A9CKV4	apeA Atu6115	HEPN_Apea domain-containing protein	DRM only	0	0.177524
A9CKV5	Atu6114	Uncharacterized protein	DRM only	0	0.243574
A9CKV6	Atu6113	UDP-N-acetylglucosamine kinase (EC 2.7.1.176)	DRM only	1	0.0297532
A9CKW2	Atu6101	Helicase, SNF2 family	1.7502	0	0.235149
A9CKW4	Atu6098	Transcriptional regulator, HTH family	DSM only	0	0.307258
A9CKX3	Atu6084	Nitrilotriacetate monooxygenase, component A	DSM only	1	0.000572473
A9CKX4	Atu6083	Peptidase_S8 domain-containing protein	0.775313	0	0.82097
A9CKX5	Atu6082	AAA-family ATPase	DRM only	0	0.103969
A9CKX6	Atu6079	Putative nitrilotriacetate monooxygenase	DSM only	0	0.196872
A9CKY1	Atu6072	Thermophilic desulfurizing enzyme	DRM only	0	0.230662
A9CKY4	rbsA Atu6069	ABC transporter, nucleotide binding/ATPase protein (Ribose)	DRM only	0	0.298649
A9CKY6	acd Atu6066	Acyl-CoA dehydrogenase	DSM only	0	0.265143
A9CKY7	Atu6065	CMD domain-containing protein	DRM only	0	0.134055
A9CKY8	Atu6063	Oxidoreductase, GMC family	DRM only	0	0.488942
A9CKZ3	ssuC Atu6057	ABC transporter, membrane spanning protein (Nitrate/sulfonates)	DRM only	0	0.0717701
A9CKZ6	Atu6052	Uncharacterized protein	DRM only	0	0.183761
A9CKZ8	Atu6050	Uncharacterized protein	DSM only	0	0.369026
A9CL00	Atu6048	Helicase ATP-binding domain-containing protein	1.40625	0	0.655414
A9CL04	hyuB Atu6023	N-methylhydantoinase B/acetone carboxylase, alpha subunit	DRM only	0	0.240917
A9CL05	hyuA Atu6022	N-methylhydantoinase A/acetone carboxylase, beta subunit	DSM only	0	0.196419
A9CL10	tms1 Atu6011	Tryptophan 2-monooxygenase (EC 1.13.12.3)	DSM only	0	0.202542
A9CL18	virE3 Atu6191	VirA/G regulated protein	1.33672	0	0.632386
A9CL31	Atu5518	NAD_binding_9 domain-containing protein	DRM only	0	0.298351
A9CL33	Atu5516	Uncharacterized protein	DRM only	0	0.221827
A9CL35	Atu5510	Uncharacterized protein	DRM only	1	0.034075
A9CL50	Atu5480	ABC transporter, nucleotide binding/ATPase protein	DRM only	0	0.183761
A9CL51	argE Atu5479	Acetylornithine deacetylase	DSM only	0	0.260859
A9CL53	pyrG Atu5476	CTP synthase (glutamine hydrolyzing) (EC 6.3.4.2)	DRM only	0	0.234139
A9CL54	Atu5475	VOC domain-containing protein	DRM only	0	0.0723397
A9CL58	galE Atu5463	Putative UDP-glucose 4-epimerase	0.832181	1	0.00832514
A9CL59	Atu5462	ABC transporter, nucleotide binding/ATPase protein	DSM only	0	0.279704
A9CL64	attE Atu5452	ABC transporter, nucleotide binding/ATPase protein	DRM only	0	0.244499
A9CL67	Atu5445	Oxidoreductase	DSM only	0	0.211658
A9CL68	Atu5442	Methyl-accepting chemotaxis protein	0.758411	0	0.600322
A9CL75	Atu5434	AP_endonuc_2 domain-containing protein	DRM only	0	0.333953
A9CL81	potG potA Atu5423	Spermidine/putrescine import ATP-binding protein PotA (EC 7.6.2.11)	DRM only	1	0.0135433
A9CL84	Atu5415	Flavin_Reduct domain-containing protein	DSM only	0	0.0554421
A9CL90	Atu5406	Transcriptional regulator, GntR family	DSM only	0	0.287303
A9CL96	Atu5395	MFS permease	DRM only	0	0.339385
A9CL98	Atu5392	Transcriptional regulator, LysR family	DSM only	0	0.177927
A9CLA3	Atu5384	Uncharacterized protein	1.03623	0	0.966212
A9CLA4	Atu5382	HlyD family secretion protein	DRM only	0	0.0890162
A9CLA5	Atu5381	AcrB/AcrD/AcrF family protein	DRM only	0	0.138181
A9CLA6	Atu5377	Two component sensor kinase	DRM only	0	0.0746484
A9CLB4	Atu5362	Uncharacterized protein	DRM only	0	0.629504
A9CLB9	Atu5348	Lipase/esterase	DRM only	0	0.183527
A9CLC2	Atu5341	Transcriptional regulator, AraC family	DRM only	0	0.183527
A9CLC3	Atu5334	Hydroxypyruvate reductase	DRM only	0	0.195833
A9CLC8	Atu5328	D-isomer specific 2-hydroxyacid dehydrogenase, NAD-binding	DRM only	0	0.183527
A9CLC9	Atu5327	Transcriptional regulator, LysR family	DRM only	0	0.321952
A9CLD3	Atu5322	FMN_red domain-containing protein	DRM only	1	0.0189535
A9CLD7	Atu5313	FAD-binding FR-type domain-containing protein	0.156829	0	0.301831
A9CLD8	Atu5312	ABC transporter, substrate binding protein (Iron)	DSM only	0	0.184204
A9CLE1	Atu5302	Aminotransferase, class III	DRM only	0	0.183761
A9CLE3	Atu5299	Uncharacterized protein	2.08843	1	0.0102414
A9CLE4	Atu5297	Hydrolase	1.41903	0	0.474026
A9CLE5	Atu5296	Arylester hydrolase	0.10928	1	0.0148948
A9CLE8	Atu5289	Transcriptional regulator, TetR family	DRM only	0	0.301983
A9CLF6	Atu5277	Uncharacterized protein	DRM only	0	0.183761
A9CLG3	Atu5270	Permease component of C4 dicarboxylate transporter	8.32356	1	0.00824018
A9CLG4	Atu5269	Permease component of C4 dicarboxylate transporter	7.66693	0	0.0743677
A9CLG5	dctP Atu5268	ABC transporter, substrate binding protein	1.39398	0	0.0554989
A9CLI8	Atu5230	GAF domain-containing protein	DRM only	0	0.181675
A9CLJ8	proV Atu5218	ABC transporter, nucleotide binding/ATPase protein (Glycine betaine/L-proline)	1.58181	0	0.460802
A9CLK5	Atu5208	Transcriptional regulator, LysR family	DRM only	0	0.629504
A9CLK6	Atu5207	Nitroreductase domain-containing protein	DRM only	0	0.226981
A9CLK8	pirA Atu5201	Pirin-like protein	DSM only	0	0.202542
A9CLL5	Atu5184	Transcriptional regulator, LysR family	DRM only	0	0.229055
A9CLM0	avhB5 Atu5166	Type IV secretion protein AvhB5	DRM only	0	0.35222
A9CLM7	atrC Atu5123	Acetolactate synthase	0.501694	0	0.550204
A9CLM9	Atu5119	Two component response regulator	DRM only	0	0.137707
A9CLN0	Atu5118	Aminotransferase, class II	3.72387	0	0.363623
A9CLN3	Atu5112	HipA_C domain-containing protein	DRM only	0	0.0746484
A9CLP1	Atu5099	UmuC domain-containing protein	DSM only	0	0.314956
A9CLP5	rcdA Atu5090	Curdlan Synthase	DRM only	0	0.183628
A9CLP6	Atu5087	Two component sensor kinase	DRM only	0	0.0504655
A9CLQ0	Atu5076	Uncharacterized protein	DRM only	0	0.125265
A9CLQ1	pdhR Atu5075	Transcriptional regulator, GntR family	DRM only	1	0.0176535
A9CLQ2	attL Atu5074	Iron alcohol dehydrogenase	DRM only	0	0.183527
A9CLQ4	dppA Atu5071	ABC transporter, substrate binding protein (Dipeptide)	0.371081	1	0.032172
A9CLQ7	Atu5068	ABC transporter, nucleotide binding/ATPase protein (Oligopeptide)	8.25432	0	0.107713
A9CLR3	ugpB Atu5058	ABC transporter, substrate binding protein (Glycerol-3-phosphate)	DSM only	0	0.260556
A9CLS2	Atu5039	Fido domain-containing protein	DRM only	0	0.183527
A9CLS7	Atu5022	KAP NTPase domain-containing protein	2.42126	0	0.103712
A9CLT1	Atu5016	HTH_13 domain-containing protein	DRM only	0	0.183761
O85128	cheB Atu0519 AGR_C_916	Protein-glutamate methylesterase/protein-glutamine glutaminase (EC 3.1.1.61) (EC 3.5.1.44)	DRM only	0	0.271366
P07165	virC1 Atu6180 AGR_pTi_18	Protein virC1	2.48125	0	0.0764106
P07166	virC2 Atu6179 AGR_pTi_16	Protein virC2	30.4423	1	0.00432928
P07169	virB11 Atu6177 AGR_pTi_14	Protein VirB11	15.7734	0	0.0785257
P07545	virG Atu6178 AGR_pTi_15	Regulatory protein VirG	3.07407	1	0.0170644
P08062	virE2 Atu6190 AGR_pTi_28	Single-strand DNA-binding protein (63.5 kDa virulence protein)	1.00481	0	0.985406
P0A2V0	ndvA chvA Atu2728 AGR_C_4944	Beta-(1-->2)glucan export ATP-binding/permease protein NdvA (EC 7.5.2.3) (Attachment protein)	27.7964	0	0.0650119
P0A331	ftsA Atu2087 AGR_C_3785	Cell division protein FtsA	DRM only	0	0.581644
P0A3B5	efp chvH Atu2553 AGR_C_4625	Elongation factor P (EF-P)	0.332293	1	0.00174595
P0A3F2	glgA1 glgA Atu4075 AGR_L_1562	Glycogen synthase 1 (EC 2.4.1.21) (Starch [bacterial glycogen] synthase 1)	1.15686	0	0.882274
P0A3I8	hrcA Atu0328 AGR_C_572	Heat-inducible transcription repressor HrcA	2.65445	0	0.219497
P0A3Q5	miaA Atu2039 AGR_C_3695	tRNA dimethylallyltransferase (EC 2.5.1.75) (Dimethylallyl diphosphate:tRNA dimethylallyltransferase) (DMAPP:tRNA dimethylallyltransferase) (DMATase) (Isopentenyl-diphosphate:tRNA isopentenyltransferase) (IPP transferase) (IPPT) (IPTase)	DRM only	0	0.113375
P0A4E3	rpoA Atu1923 AGR_C_3518	DNA-directed RNA polymerase subunit alpha (RNAP subunit alpha) (EC 2.7.7.6) (RNA polymerase subunit alpha) (Transcriptase subunit alpha)	0.280807	1	0.0186015
P0A4T6	pcaQ Atu4543 AGR_L_649	HTH-type transcriptional regulator PcaQ (Pca operon transcriptional activator)	DRM only	0	0.906843
P17791	virB1 Atu6167 AGR_pTi_3	Protein virB1	9.16056	1	0.0474384
P17793	virB3 Atu6169 AGR_pTi_bx137	Protein virB3	DRM only	0	0.169965
P17794	virB4 Atu6170 AGR_pTi_8	Protein virB4	5.36824	1	3.27831e-05
P17795	virB5 Atu6171 AGR_pTi_9	Protein virB5	DRM only	0	0.271113
P17797	virB7 Atu6173 AGR_pTi_10.1	Outer membrane lipoprotein virB7	DRM only	1	0.0380681
P17798	virB8 Atu6174 AGR_pTi_11	Protein virB8	11.0397	1	0.0387046
P17799	virB9 Atu6175 AGR_pTi_12	Protein virB9	9.69756	1	0.00916017
P17800	virB10 Atu6176 AGR_pTi_13	Protein virB10	5.887	1	0.00511869
P18540	virA Atu6166 AGR_pTi_2	Wide host range VirA protein (WHR VirA) (EC 2.7.13.3)	DRM only	1	0.0268043
P18591	virD1 Atu6181 AGR_pTi_19	T-DNA border endonuclease VirD1 (EC 3.1.-.-)	1.39274	0	0.297176
P18592	virD2 Atu6182 AGR_pTi_21	T-DNA border endonuclease VirD2 (EC 3.1.-.-)	1.77795	0	0.1654
P18593	virD3 Atu6183 AGR_pTi_22	Protein VirD3	0.163504	0	0.231572
P18594	virD4 Atu6184 AGR_pTi_23	Protein VirD4	7.68621	0	0.0681659
P24404	leuB Atu2791 AGR_C_5067	3-isopropylmalate dehydrogenase (EC 1.1.1.85) (3-IPM-DH) (Beta-IPM dehydrogenase) (IMDH)	3.42069	1	0.0481869
P25548	chvE Atu2348 AGR_C_4267	Multiple sugar-binding periplasmic receptor ChvE	DSM only	1	0.0270447
P30779	groL groEL mopA Atu0682 AGR_C_1220	60 kDa chaperonin (GroEL protein) (Protein Cpn60)	0.0482508	1	0.0201258
P30780	groS groES Atu0683 AGR_C_1221	10 kDa chaperonin (GroES protein) (Protein Cpn10)	0.239504	1	0.00639658
P32104	accR Atu6138 AGR_pTi_255	Transcriptional repressor AccR	DRM only	0	0.301357
P33156	recA Atu1874 AGR_C_3441	Protein RecA (Recombinase A)	2.16213	0	0.0617739
P33452	rpoD sigA Atu2167 AGR_C_3929	RNA polymerase sigma factor RpoD (Major vegetative sigma factor) (Sigma-70)	0.606408	0	0.0988641
P50018	dnaJ Atu0121 AGR_C_192	Chaperone protein DnaJ	1.69381	1	0.00103832
P50019	dnaK Atu0122 AGR_C_195	Chaperone protein DnaK (HSP70) (Heat shock 70 kDa protein) (Heat shock protein 70)	0.484439	0	0.12992
P58638	pyrF Atu0298 AGR_C_515	Orotidine 5'-phosphate decarboxylase (EC 4.1.1.23) (OMP decarboxylase) (OMPDCase) (OMPdecase)	DRM only	0	0.268035
P58665	ispG gcpE Atu2723 AGR_C_4936	4-hydroxy-3-methylbut-2-en-1-yl diphosphate synthase (flavodoxin) (EC 1.17.7.3) (1-hydroxy-2-methyl-2-(E)-butenyl 4-diphosphate synthase)	DRM only	0	0.912576
P58739	dadA Atu3293 AGR_L_3050	D-amino acid dehydrogenase (EC 1.4.99.-)	1.86961	0	0.0515128
P58740	uppP1 bacA1 upk1 Atu0294 AGR_C_505	Undecaprenyl-diphosphatase 1 (EC 3.6.1.27) (Bacitracin resistance protein 1) (Undecaprenyl pyrophosphate phosphatase 1)	DRM only	0	0.0628829
P58741	uppP2 bacA2 upk2 Atu0998 AGR_C_1833	Undecaprenyl-diphosphatase 2 (EC 3.6.1.27) (Bacitracin resistance protein 2) (Undecaprenyl pyrophosphate phosphatase 2)	DRM only	0	0.209223
P58745	rsmH mraW Atu2102 AGR_C_3815	Ribosomal RNA small subunit methyltransferase H (EC 2.1.1.199) (16S rRNA m(4)C1402 methyltransferase) (rRNA (cytosine-N(4)-)-methyltransferase RsmH)	0.734936	0	0.666293
P58758	tzs Atu6164 AGR_pTi_290	Adenylate dimethylallyltransferase (EC 2.5.1.27) (Dimethylallyl transferase) (Isopentenyl transferase) (Trans-zeatin producing protein)	4.21435	0	0.0862029
P58760	rutB Atu2499 AGR_C_4541	Ureidoacrylate amidohydrolase RutB (EC 3.5.1.110)	DRM only	0	0.183628
P58788	hisH Atu0041 AGR_C_64	Imidazole glycerol phosphate synthase subunit HisH (EC 4.3.2.10) (IGP synthase glutaminase subunit) (EC 3.5.1.2) (IGP synthase subunit HisH) (ImGP synthase subunit HisH) (IGPS subunit HisH)	DRM only	0	0.184925
P58795	Atu1728 AGR_C_3175	NAD(P)H dehydrogenase (quinone) (EC 1.6.5.2) (Flavoprotein WrbA) (NAD(P)H:quinone oxidoreductase) (NQO)	DRM only	0	0.0734015
P58799	hisF Atu0039 AGR_C_62	Imidazole glycerol phosphate synthase subunit HisF (EC 4.3.2.10) (IGP synthase cyclase subunit) (IGP synthase subunit HisF) (ImGP synthase subunit HisF) (IGPS subunit HisF)	DRM only	0	0.0523219
P63187	grpE Atu0329 AGR_C_573	Protein GrpE (HSP-70 cofactor)	0.540672	0	0.379085
P68993	rpmJ Atu3756.1 AGR_L_2154	50S ribosomal protein L36	DSM only	0	0.309045
P68995	rpmD Atu1928.1 AGR_C_3526	50S ribosomal protein L30	0.634543	0	0.504395
P68996	rpmH Atu0385.1 AGR_C_676	50S ribosomal protein L34	DRM only	0	0.577483
Q00678	nocR Atu6029 AGR_pTi_70	Regulatory protein NocR	DRM only	0	0.190887
Q07737	chvG Atu0033 AGR_C_52	Sensor protein ChvG (EC 2.7.13.3)	9.6041	1	0.00609102
Q44338	flgG Atu0552 AGR_C_972	Flagellar basal-body rod protein FlgG (Distal rod protein)	DSM only	0	0.217077
Q44346	traG Atu6124 AGR_pTi_bx12	Conjugal transfer protein TraG	DRM only	1	0.000222978
Q44349	traA Atu6127 AGR_pTi_237	Conjugal transfer protein TraA	DRM only	0	0.271366
Q44452	traM Atu6131 AGR_pTi_bx139	Transcriptional repressor TraM	DRM only	0	0.231519
Q44456	motA Atu0560 AGR_C_985	Motility protein A (Chemotaxis protein MotA)	DRM only	0	0.183527
Q44458	fliG Atu0563 AGR_C_989	Flagellar motor switch protein FliG	DSM only	0	0.31068
Q7CRC8	Atu3012	Uncharacterized protein	DRM only	0	0.548403
Q7CRE5	gudD Atu3029	Glucarate dehydratase	DRM only	0	0.183628
Q7CRF1	Atu3035	Two component response regulator	0.410113	0	0.0835032
Q7CRG2	Atu3046	Oxidoreductase	DRM only	0	0.186011
Q7CRG5	Atu3049	ABC transporter, substrate binding protein (Oligopeptide)	DRM only	0	0.229055
Q7CRG6	Atu3050	Putative AgaE	DRM only	0	0.0804814
Q7CRG9	Atu3053	ABC transporter, nucleotide binding/ATPase protein (Peptide)	0.119328	0	0.231031
Q7CRI7	Atu3072	Peptide synthetase	DSM only	0	0.794922
Q7CRJ1	uraA Atu3076	Uracil transport protein	DRM only	0	0.127723
Q7CRK5	Atu3091	Uncharacterized protein	DRM only	1	0.0124404
Q7CRM1	Atu3107	Transcriptional regulator, LacI family	DRM only	0	0.8801
Q7CRM5	Atu3111	ABC transporter, nucleotide binding/ATPase protein (Sugar)	DRM only	0	0.12899
Q7CRM8	Atu3114	ABC transporter, substrate binding protein (Sugar)	DSM only	0	0.202542
Q7CRN4	cspA Atu3121	Cold shock protein	DSM only	0	0.413185
Q7CRN5	Atu3122	Cold shock protein	DSM only	0	0.183679
Q7CRT6	Atu3179	ABC transporter, membrane spanning protein	DRM only	0	0.0761802
Q7CRT8	Atu3181	CobW C-terminal domain-containing protein	7.93785	1	0.00654972
Q7CRU3	ugpA Atu3186 AGR_L_3247	sn-glycerol-3-phosphate transport system permease protein UgpA	DRM only	0	0.14338
Q7CRV2	speF Atu3196	Ornithine decarboxylase	DSM only	0	0.172089
Q7CRV3	ptxR Atu3197	Transcriptional regulator, LysR family	DRM only	1	0.00552022
Q7CRV9	Atu3203	RND multidrug efflux membrane permease	10.4143	1	0.00211415
Q7CRW1	Atu3205	Uncharacterized protein	DSM only	0	0.0852247
Q7CRW2	Atu3206	Uncharacterized protein	DRM only	0	0.409018
Q7CRW5	Atu3210	DNA translocase FtsK	DRM only	0	0.273524
Q7CRY0	Atu3227	Transcriptional regulator, AraC family	DRM only	0	0.116401
Q7CRY6	Atu3235	AP_endonuc_2 domain-containing protein	DSM only	0	0.173048
Q7CRZ2	Atu3241	Dehydrogenase	DSM only	0	0.196419
Q7CRZ4	gatA Atu3243	Indole-3-acetamide hydrolase (Indoleacetamide hydrolase)	DRM only	0	0.646939
Q7CS11	Atu3264	Transcriptional regulator, IclR family	1.68611	0	0.583773
Q7CS16	Atu3269	ABC transporter, substrate binding protein (Dipeptide)	0.410113	0	0.0835032
Q7CS20	Atu3273	HlyD family secretion protein	8.40351	1	0.0174029
Q7CS34	Atu3287	Thiamine biosynthesis associated protein	DRM only	0	0.629504
Q7CS36	Atu3294	Transcriptional regulator, GntR family	DSM only	0	0.114126
Q7CS37	Atu3295	Lectin-like protein BA14k	30.9534	1	0.011125
Q7CS39	dctB Atu3297	Histidine kinase (EC 2.7.13.3)	0.582461	0	0.418639
Q7CS43	celD Atu3302	Cellulose biosynthesis protein	DRM only	0	0.44773
Q7CS44	celE Atu3303	Cellulose synthesis protein	DSM only	0	0.406703
Q7CS46	celB Atu3308	Cyclic di-GMP-binding protein (Cellulose synthase regulatory subunit)	DRM only	1	0.0335183
Q7CS49	Atu3312	GH26 domain-containing protein	DRM only	0	0.397452
Q7CS60	Atu3324	Uncharacterized protein	DSM only	1	0.0160168
Q7CS63	exoY Atu3327	Succinoglycan exopolysaccharide synthesis protein	0.128773	1	0.0428175
Q7CS68	Atu3332	Uncharacterized protein	DRM only	0	0.165538
Q7CS72	thuR Atu3337	Transcriptional regulator, LacI family	DRM only	0	0.183527
Q7CS92	Atu3357	ABC transporter, substrate binding protein (Amino acid)	DSM only	0	0.0837619
Q7CS93	Atu3358	ABC transporter, membrane spanning protein (Amino acid)	DRM only	0	0.12326
Q7CS95	Atu3360	ABC transporter, nucleotide binding/ATPase protein (Amino acid)	0.931289	0	0.907963
Q7CSB6	prsE2 Atu3382	Membrane fusion protein (MFP) family protein	DRM only	0	0.574344
Q7CSB9	hasR Atu3385	Heme receptor	DRM only	0	0.0521643
Q7CSF3	Atu3420	Monooxygenase	DRM only	0	0.247626
Q7CSF6	Atu3424	Acyl-CoA_dh_N domain-containing protein	0.220699	0	0.344709
Q7CSG2	Atu3432	Desulfurizing enzyme	DRM only	0	0.301357
Q7CSJ7	bkdB Atu3471	Dihydrolipoamide acetyltransferase component of pyruvate dehydrogenase complex (EC 2.3.1.-)	7.72237	0	0.0654531
Q7CSK4	mccB Atu3478	3-methylcrotonoyl-CoA carboxylase beta subunit	0.164915	1	0.00490153
Q7CSK5	mccA Atu3479	3-methylcrotonyl-CoA carboxylase alpha subunit	DSM only	0	0.115446
Q7CSK9	Atu3485	Oxidoreductase	DRM only	0	0.230662
Q7CSM1	Atu3498	Aldehyde dehydrogenase	0.185966	0	0.115882
Q7CSM5	Atu3503	Sulfate transport system permease protein CysT	DRM only	0	0.363269
Q7CSM6	Atu3504	ABC transporter, substrate binding protein (Sulfate)	DRM only	0	0.113691
Q7CSM8	Atu3506	Uncharacterized protein	0.0834891	0	0.0697431
Q7CSM9	Atu3507	SH3b domain-containing protein	2.56249	1	0.0204469
Q7CSN1	Atu3510	Amidohydrolase	13.3176	0	0.0549329
Q7CSN8	ppiD Atu3519	Parvulin-like PPIase (Peptidyl-prolyl cis-trans isomerase plp) (Rotamase plp)	DSM only	0	0.0901716
Q7CSN9	secA Atu3520 AGR_L_2621	Protein translocase subunit SecA (EC 7.4.2.8)	0.718717	0	0.521377
Q7CSS2	Atu3558	Glycosyltransferase	DSM only	0	0.202542
Q7CSS3	Atu3559	Glycosyltransferase	DRM only	1	0.000222978
Q7CST1	Atu3568	TPR_REGION domain-containing protein	0.504176	0	0.581
Q7CST8	xylH Atu3575	ABC transporter, membrane spanning protein (Xylose)	DRM only	1	0.000871159
Q7CSU4	pccA Atu3581	Propionyl-CoA carboxylase (EC 6.4.1.3)	0.219476	0	0.0588061
Q7CSU6	Atu3585	Glutathione S-transferase	1.84368	0	0.13183
Q7CSU7	Atu3586	Propionyl-CoA carboxylase	0.0364385	0	0.166939
Q7CSU8	Atu3587	Transcriptional regulator	DRM only	0	0.38147
Q7CSV2	Atu3591	Short chain dehydrogenase	0.905715	0	0.911734
Q7CSV3	Atu3593	Corrinoid adenosyltransferase (EC 2.5.1.17)	DSM only	1	0.0216917
Q7CSV4	Atu3594	Rhomboid domain-containing protein	DRM only	0	0.183761
Q7CSV6	etfA Atu3596	Electron transfer flavoprotein alpha subunit	2.45007	0	0.37144
Q7CSW1	Atu3602	Uncharacterized protein	3.4124	1	0.0293244
Q7CSX0	tyrC Atu3611	Prephenate dehydrogenase	DRM only	1	0.0471618
Q7CSX1	Atu3613	Methyltransf_11 domain-containing protein	17.7426	1	0.037231
Q7CSX4	Atu3616	Uncharacterized protein	0.147276	0	0.179531
Q7CSY1	dnaJ Atu3623	Molecular chaperone, DnaJ family	DSM only	0	0.0508778
Q7CSY3	aroK Atu3626	Shikimate kinase (SK) (EC 2.7.1.71)	0.935638	0	0.873002
Q7CSY6	Atu3631	Uncharacterized protein	DRM only	1	0.0479467
Q7CSY9	dacF Atu3634	Penicillin-binding protein dacf	0.0839005	0	0.136375
Q7CSZ0	Atu3635	Amidohydrolase	13.9419	0	0.0922003
Q7CSZ3	Atu3639	Uncharacterized protein	DRM only	0	0.0654866
Q7CSZ6	vgrG Atu3642	VgrG protein	2.91456	1	0.0254149
Q7CT08	Atu3662	Uncharacterized protein	6.67796	1	0.00518265
Q7CT10	ephA Atu3664	Epoxide hydrolase	DRM only	0	0.22384
Q7CT14	Atu3669	Probable multidrug resistance protein NorM	DRM only	0	0.273524
Q7CT15	Atu3670	Siderophore biosynthesis protein	DRM only	0	0.150649
Q7CT27	Atu3683	Peptide synthetase, siderophore biosynthesis protein	0.898808	0	0.87656
Q7CT29	Atu3685	Thioesterase, putative siderophore biosynthesis protein	DRM only	0	0.275174
Q7CT31	Atu3687	TonB-dependent receptor	DRM only	0	0.191158
Q7CT36	Atu3692	Sigma factor	DSM only	0	0.222645
Q7CT38	pbpC Atu3694	Penicillin-insensitive transglycosylase (EC 2.4.1.129) (Peptidoglycan TGase)	DRM only	0	0.183761
Q7CT39	Atu3695	TPR_REGION domain-containing protein	0.0485665	1	0.0423546
Q7CT40	lonD Atu3697	ATP-dependent protease LA 2	DRM only	0	0.221011
Q7CT41	Atu3698	Putative thioredoxin	0.0971702	0	0.127285
Q7CT45	Atu3705	Tim44 domain-containing protein	DRM only	0	0.077454
Q7CT48	Atu3708	Outer surface protein	DRM only	0	0.0731152
Q7CT50	ftsH Atu3710	ATP-dependent zinc metalloprotease FtsH (EC 3.4.24.-)	2.92434	1	0.00180859
Q7CT52	cpoB Atu3712	Cell division coordinator CpoB	DSM only	0	0.128748
Q7CT55	tolQ Atu3717	Tol-Pal system protein TolQ	38.4795	1	0.0285261
Q7CT60	Atu3725	Methyl-accepting chemotaxis protein	DRM only	0	0.975985
Q7CT66	Atu3732	Hemolysin	3.1774	1	0.010543
Q7CT69	Atu3738	Na+/H+ antiporter	DRM only	0	0.147213
Q7CT75	motB Atu3746	Flagellar motor protein	DRM only	1	0.0264211
Q7CT76	Atu3747	Uncharacterized protein	11.6687	1	9.43772e-05
Q7CT78	enhC Atu3749	Enhanced entry protein	DRM only	0	0.22384
Q7CT90	Atu3763	Uncharacterized protein	1.1699	0	0.783912
Q7CT92	pepF Atu3765	Oligoendopeptidase F	DRM only	1	0.0179555
Q7CT93	Atu3766	Probable branched-chain-amino-acid aminotransferase	DRM only	0	0.367283
Q7CT96	Atu3770	5'-nucleotidase	0.023055	1	0.000691729
Q7CT99	kpsF Atu3774	Capsule expression protein	DSM only	0	0.217077
Q7CTA1	Atu3777	Uncharacterized protein	DRM only	0	0.241308
Q7CTA4	Atu3780	Uncharacterized protein	DRM only	0	0.729275
Q7CTA8	gltB Atu3784	Glutamate synthase large subunit	1.95549	0	0.588393
Q7CTB1	kdpD Atu3787	Histidine kinase (EC 2.7.13.3)	DRM only	1	0.013883
Q7CTB6	Atu3794	Transcriptional regulator, FadR/GntR family	DRM only	0	0.229055
Q7CTC0	Atu3798	Transcriptional regulator, TetR family	DRM only	0	0.191176
Q7CTC1	hutC Atu3799	Transcriptional regulator, GntR family	0.599925	0	0.105537
Q7CTD7	Atu3815	Transcriptional regulator, GntR family	DRM only	1	0.00752497
Q7CTD8	fdh Atu3816	D-threo-aldose 1-dehydrogenase	DSM only	0	0.196419
Q7CTE3	rbsB Atu3821	ABC transporter, substrate binding protein (Ribose)	DSM only	0	0.127776
Q7CTG0	Atu3843	Uncharacterized protein	DSM only	0	0.217077
Q7CTG8	Atu3854	AAA domain-containing protein	DRM only	0	0.0740764
Q7CTH2	exsE Atu3863	ABC transporter, nucleotide binding/ATPase protein	DRM only	0	0.137989
Q7CTH3	Atu3865	TGc domain-containing protein	0.397556	1	0.0205046
Q7CTH7	Atu3869	ABC transporter, nucleotide binding/ATPase protein	DRM only	1	0.00621887
Q7CTI1	Atu3873	Uncharacterized protein	0.893085	0	0.871622
Q7CTI2	lyxK Atu3874	L-xylulose kinase	DRM only	0	0.183527
Q7CTI6	Atu3878	Transcriptional regulator	DRM only	0	0.202032
Q7CTK6	nasA Atu3900	Nitrate reductase large subunit	1.04135	0	0.961441
Q7CTK8	nirB Atu3902	Nitrite reductase large subunit	DRM only	0	0.298655
Q7CTL4	Atu3908	Transcriptional regulator, GntR family	DRM only	0	0.0898315
Q7CTL5	Atu3909	Conserved hypothetical	DRM only	1	0.0337455
Q7CTM1	bfrA Atu3916	Exogenous ferric siderophore receptor	DSM only	0	0.392969
Q7CTM2	Atu3917	HTH lysR-type domain-containing protein	DRM only	0	0.939483
Q7CTM7	repA Atu3924	Replication protein A	DRM only	1	0.00229581
Q7CTN6	Atu3936	Transcriptional regulator, GntR family	DSM only	0	0.227246
Q7CTP3	arcB Atu3949	Ornithine cyclodeaminase	DRM only	0	0.183628
Q7CTQ1	Atu3957	ABC transporter, substrate binding protein (Glycine-betaine)	DRM only	0	0.226981
Q7CTQ2	Atu3958	Oxidoreductase	DRM only	0	0.271366
Q7CTQ5	Atu3961	Transcriptional regulator, GntR family	DRM only	0	0.294836
Q7CTQ7	Atu3963	Transcriptional regulator, GntR family	DRM only	0	0.183527
Q7CTR3	Atu3969	ABC transporter, membrane spanning protein (Sugar)	DRM only	0	0.079108
Q7CTR4	Atu3970	ABC transporter, nucleotide binding/ATPase protein (Sugar)	1.12035	0	0.561234
Q7CTS0	Atu3976	TPR_REGION domain-containing protein	DSM only	0	0.358343
Q7CTS8	Atu3986	Exonuclease domain-containing protein	DRM only	0	0.203643
Q7CTU5	arcA Atu4007	Arginase (EC 3.5.3.1)	0.131863	1	0.0466784
Q7CTV4	kgtP Atu4017	MFS permease	DRM only	1	0.0331089
Q7CTV5	Atu4018	Histidine kinase (EC 2.7.13.3)	3.92255	0	0.144425
Q7CTW5	Atu4029	Gluconolactonase	0.0920117	0	0.0564849
Q7CTX0	Atu4034	Two component sensor kinase	14.7063	1	0.0331375
Q7CTX1	Atu4035	Two component response regulator	1.83616	0	0.268957
Q7CTX8	Atu4044	ABC transporter, nucleotide binding/ATPase protein (Glycine betaine)	1.57928	0	0.313045
Q7CTX9	Atu4045	ABC transporter, membrane spanning protein (Glycine betaine)	DRM only	0	0.22384
Q7CTY1	Atu4047	Histidine kinase (EC 2.7.13.3)	DRM only	0	0.291015
Q7CTY7	exoA Atu4053	Succinoglycan biosynthesis protein	14.7422	1	0.0325988
Q7CTZ1	exoT Atu4057	Succinoglycan biosynthesis transport protein	DRM only	1	0.0268476
Q7CTZ2	exoW Atu4058	Succinoglycan biosynthesis protein	DRM only	1	0.000222978
Q7CTZ4	exoU Atu4060	Succinoglycan biosynthesis glycosyltransferase	0.872538	0	0.788526
Q7CTZ7	Atu4063	O-linked GlcNAc transferase	6.09632	1	0.00391357
Q7CTZ8	soxB Atu4066	Sarcosine oxidase beta subunit	0.27164	1	0.0358936
Q7CU06	exoC Atu4074	Phosphoglucomutase	0.405428	1	0.00212128
Q7CU15	Atu4088	HTH-type transcriptional regulator	DRM only	1	0.011862
Q7CU26	rpsA Atu4104	30S ribosomal protein S1	0.21677	0	0.0789344
Q7CU40	Atu4121	Monooxygenase	DRM only	1	0.0388947
Q7CU52	Atu4134	Uncharacterized protein	DRM only	1	0.0442292
Q7CU63	Atu4145	Uncharacterized protein	DRM only	1	0.0329261
Q7CU65	gshB Atu4147	Glutathione synthetase (EC 6.3.2.3) (GSH synthetase) (GSH-S) (GSHase) (Glutathione synthase)	DRM only	0	0.264178
Q7CU70	Atu4153	Aldehyde dehydrogenase (NAD(+)) (EC 1.2.1.3)	DRM only	0	0.733363
Q7CU78	Atu4162	Two component response regulator	1.27972	0	0.585209
Q7CU79	Atu4163	Two component sensor kinase	DRM only	1	0.012986
Q7CU80	Atu4164	Two component sensor kinase	DRM only	0	0.129559
Q7CU82	exoB galE Atu4166	UDP-glucose 4-epimerase (EC 5.1.3.2)	13.4714	1	0.000153699
Q7CU84	Atu4168	DUF883_C domain-containing protein	3.01013	0	0.0501654
Q7CU91	Atu4176	DUF4167 domain-containing protein	0.0188567	0	0.115582
Q7CU92	clpB Atu4177 AGR_L_1346	Chaperone protein ClpB	0.344305	1	0.0141487
Q7CU99	Atu4192	ABC transporter, substrate binding protein (Oligopeptide)	DRM only	0	0.323649
Q7CUB1	Atu4204	Transcriptional regulator, AraC family	DRM only	0	0.230662
Q7CUC1	cspA Atu4214	Cold shock protein	0.188115	0	0.259185
Q7CUC5	Atu4218	Multidrug efflux protein	DSM only	0	0.29884
Q7CUD9	Atu4232	Transcriptional regulator, GntR family	DRM only	0	0.0578637
Q7CUG2	Atu4256	ABC transporter, nucleotide binding/ATPase protein (Oligopeptide)	2.56093	0	0.0788631
Q7CUG3	Atu4257	ABC transporter, membrane spanning protein (Oligopeptide)	DRM only	0	0.150369
Q7CUI3	aatA Atu4278	Aminotransferase (EC 2.6.1.-)	DRM only	0	0.202032
Q7CUI4	nac Atu4279	Transcriptional regulator, LysR family	1.52746	0	0.731934
Q7CUM0	Atu4317	Transcriptional regulator, TetR family	DRM only	0	0.392454
Q7CUM3	rbsA Atu4321	ABC transporter, nucleotide binding/ATPase protein (Ribose)	3.51689	0	0.0651702
Q7CUN1	impN Atu4330	Serine/threonine protein kinase	DRM only	1	0.0370056
Q7CUN2	impM Atu4331	Serine/threonine phosphoprotein phosphatase	4.49933	1	0.00985975
Q7CUN4	impK Atu4333	OmpA-like porin	1.60754	0	0.313306
Q7CUP0	impE Atu4339	Uncharacterized protein	DRM only	1	0.0207088
Q7CUP5	clpB Atu4344	ATP-dependent Clp protease, ATP-binding subunit	7.12832	1	0.0131405
Q7CUP8	Atu4347	Uncharacterized protein	2.19127	1	0.0265866
Q7CUQ0	Atu4349	DUF4123 domain-containing protein	0.949795	0	0.750612
Q7CUQ2	Atu4351	Uncharacterized protein	0.979716	0	0.862103
Q7CUT0	nnrR Atu4380	Transcriptional regulatory, Crp family	DRM only	0	0.137989
Q7CUT7	norQ Atu4387	Nitric oxide reductase NorQ protein	DRM only	0	0.182338
Q7CUW1	rzcA Atu4412	Rhizobiocin/RTX toxin	DRM only	0	0.341989
Q7CUW3	rspE Atu4414	Membrane fusion protein (MFP) family protein	DRM only	0	0.298351
Q7CUX4	ade2 adeC Atu4426 AGR_L_883	Adenine deaminase 2 (Adenase 2) (Adenine aminase 2) (EC 3.5.4.2)	DRM only	0	0.221827
Q7CUY4	tnp Atu4436	IS5 family transposase	DRM only	0	0.209223
Q7CUZ1	Atu4443	RHH_4 domain-containing protein	DRM only	0	0.183628
Q7CUZ9	mtlK Atu4451	Mannitol 2-dehydrogenase	DRM only	0	0.766702
Q7CV04	nth Atu4457	Endonuclease III (EC 4.2.99.18) (DNA-(apurinic or apyrimidinic site) lyase)	DRM only	0	0.212406
Q7CV11	Atu4466	Oxidoreductase	0.85334	0	0.837818
Q7CV14	sitC Atu4469	ABC transporter, membrane spanning protein (Iron)	DRM only	0	0.0648231
Q7CV15	sitB Atu4470	ABC transporter, nucleotide binding/ATPase protein (Iron)	4.88492	1	0.0203261
Q7CV16	sitA Atu4471	ABC transporter, substrate binding protein (Iron)	1.29639	0	0.160327
Q7CV19	Atu4476	Uncharacterized protein	DRM only	0	0.387851
Q7CV21	emrA Atu4478	Multidrug resistance efflux pump	9.61432	0	0.0973188
Q7CV33	Atu4492	CHAD domain-containing protein	DSM only	0	0.194153
Q7CV35	kdgA Atu4494	Keto-hydroxyglutarate-aldolase/keto-deoxy-phosphogluconate aldolase	DSM only	1	0.0245938
Q7CV36	Atu4495	Uncharacterized protein	0.523541	0	0.143532
Q7CV37	Atu4496	Acetyltransferase	DRM only	0	0.128779
Q7CV45	Atu4504	Transcriptional regulator, MarR family	DRM only	0	0.216775
Q7CV46	pckR Atu4505	Transcriptional regulator, LacI family	1.43053	0	0.0956483
Q7CV59	livJ Atu4519	ABC transporter, substrate binding protein (Branched amino acid)	DRM only	0	0.677389
Q7CV62	Atu4523	ABC transporter, membrane spanning protein (Oligopeptide)	DRM only	0	0.226981
Q7CV70	Atu4533	ABC transporter, nucleotide binding/ATPase protein (Amino acid)	DRM only	0	0.214479
Q7CV75	pcaB Atu4538	3-carboxy-cis,cis-muconate cycloisomerase	DRM only	0	0.226981
Q7CV76	pcaG Atu4539	Protocatechuate 3,4-dioxygenase alpha chain	DSM only	0	0.107357
Q7CV77	pcaH Atu4540	Protocatechuate 3,4-dioxygenase beta chain	DSM only	0	0.0726522
Q7CV85	pcaF Atu4549	3-oxoadipyl-CoA thiolase (EC 2.3.1.174)	DSM only	0	0.50435
Q7CV86	Atu4550	Transcriptional regulator, LacI family	DRM only	0	0.058362
Q7CV87	Atu4551	ABC transporter, substrate binding protein	DSM only	0	0.115523
Q7CVB0	Atu4576	Transcriptional regulator, ROK family	DSM only	0	0.370121
Q7CVC6	Atu4592	Uncharacterized protein	DRM only	0	0.317551
Q7CVD9	Atu4606	Uncharacterized protein	6.49994	1	0.00075742
Q7CVE5	rfbA Atu4615	Glucose-1-phosphate thymidylyltransferase (EC 2.7.7.24)	0.422957	0	0.379706
Q7CVF1	dppD Atu4621	ABC transporter, nucleotide binding/ATPase protein (Dipeptide)	DRM only	0	0.226981
Q7CVF6	Atu4626	ABC transporter, substrate binding protein (Oligopeptide)	DRM only	0	0.373062
Q7CVF7	Atu4627	Uncharacterized protein	DRM only	0	0.0810659
Q7CVG0	ku Atu4631	Non-homologous end joining protein Ku	DRM only	0	0.221827
Q7CVG9	Atu4640	Uncharacterized protein	DRM only	0	0.160723
Q7CVH1	katG Atu4642 AGR_L_481	Catalase-peroxidase (CP) (EC 1.11.1.21) (Peroxidase/catalase)	0.119655	0	0.110057
Q7CVH8	Atu4649	Carbohydrate kinase	DRM only	0	0.886819
Q7CVI8	melA Atu4660	Alpha-galactosidase	DRM only	0	0.152536
Q7CVJ2	Atu4664	ABC transporter, nucleotide binding/ATPase protein (Oligopeptide)	DRM only	0	0.967521
Q7CVJ5	Atu4667	ABC transporter, nucleotide binding/ATPase protein	12.8147	1	0.0301384
Q7CVJ9	Atu4674	Transcriptional regulator, GntR family	DRM only	1	0.0176535
Q7CVL4	Atu4690	ABC transporter, nucleotide binding/ATPase protein (Amino acid)	DRM only	1	0.040259
Q7CVM8	huy hyuA1 Atu4704	Hydantoin racemase (Hydantoin racemase 1)	DRM only	0	0.255098
Q7CVN2	fdhF Atu4708	Formate dehydrogenase alpha subunit	DRM only	0	0.8801
Q7CVN4	Atu4710	MFS permease	DRM only	1	0.00404465
Q7CVN5	Atu4711	Histidine kinase (EC 2.7.13.3)	DRM only	1	0.000222978
Q7CVP5	Atu4723	ABC transporter, nucleotide binding/ATPase protein	DRM only	1	0.0270983
Q7CVQ0	Atu4729	ABC transporter, nucleotide binding/ATPase protein	DSM only	0	0.355864
Q7CVQ5	acnB Atu4734	(2R,3S)-2-methylisocitrate dehydratase (EC 4.2.1.3) ((2S,3R)-3-hydroxybutane-1,2,3-tricarboxylate dehydratase) (Probable 2-methyl-cis-aconitate hydratase)	2.72212	1	0.018094
Q7CVQ6	Atu4736	Methyl-accepting chemotaxis protein	DRM only	1	0.0172193
Q7CVQ8	Atu4739	Flavin-containing monooxygenase	DRM only	0	0.317551
Q7CVQ9	Atu4740	Zinc-binding dehydrogenase	1.69907	0	0.441876
Q7CVT1	gabD Atu4762	Succinate semialdehyde dehydrogenase	2.05093	0	0.3838
Q7CVU6	Atu4777	Ferritin domain-containing protein	DRM only	0	0.177524
Q7CVU8	Atu4780	Uncharacterized protein	0.0261754	1	0.0208365
Q7CVU9	Atu4781	Histidine kinase (EC 2.7.13.3)	DRM only	0	0.221827
Q7CVX3	pssL Atu4807	Exopolysaccharide export protein	DRM only	0	0.183628
Q7CVZ0	Atu4824	Transcriptional regulator, IclR family	DRM only	0	0.690451
Q7CVZ3	Atu4827	ABC transporter, membrane spanning protein	DRM only	0	0.0847672
Q7CW03	Atu4840	Uncharacterized protein	0.616108	0	0.360226
Q7CW06	Atu4843	ABC transporter, nucleotide binding/ATPase protein (Sugar)	DRM only	1	0.00201506
Q7CW11	deoC Atu4848	2-deoxy-D-ribose 5-phosphate aldolase (EC 4.1.2.4)	2.19045	1	0.0243373
Q7CW12	Atu4849	NADP-dependent aldehyde dehydrogenase	0.245201	1	0.00141168
Q7CW18	traA Atu4855	Conjugation protein	DRM only	0	0.333953
Q7CW23	Atu4860	HEPN domain-containing protein	DRM only	0	0.664825
Q7CW46	Atu4884	RHH_1 domain-containing protein	DRM only	0	0.275174
Q7CW51	Atu4892	Site-specific DNA-methyltransferase (adenine-specific) (EC 2.1.1.72)	DRM only	0	0.273524
Q7CW53	tnp Atu4894	Transposase	DRM only	1	0.0206878
Q7CW61	parB1 Atu2828	Chromosome Partitioning Protein	0.334832	1	0.0115427
Q7CW62	sun Atu2825	Sun protein	3.70925	1	0.0389297
Q7CW77	cobO Atu2807	Corrinoid adenosyltransferase (EC 2.5.1.17) (Cob(II)alamin adenosyltransferase) (Cob(II)yrinic acid a,c-diamide adenosyltransferase)	DRM only	0	0.22384
Q7CW81	cobG Atu2803	Cobalamin biosynthesis associated protein	1.7999	0	0.294728
Q7CW85	cobK Atu2799	Precorrin-6x reductase	DSM only	0	0.314956
Q7CW86	cobL Atu2798	Precorrin-6y methyltransferase	DRM only	0	0.166777
Q7CW97	obg Atu2781 AGR_C_5047	GTPase Obg (EC 3.6.5.-) (GTP-binding protein Obg)	1.13057	0	0.838555
Q7CW98	rsfS Atu2777	Ribosomal silencing factor RsfS	0.633067	0	0.470137
Q7CW99	Atu2775	Peptidase_M23 domain-containing protein	0.0926472	0	0.140314
Q7CWA0	Atu2774	Carboxy-terminal protease	0.594849	0	0.125258
Q7CWA3	bfr Atu2771	Bacterioferritin (EC 1.16.3.1)	0.0102534	0	0.140339
Q7CWA6	Atu2768	Uncharacterized protein	3.42866	1	0.00175191
Q7CWB0	Atu2764	YkuD domain-containing protein	DSM only	1	0.0102432
Q7CWC6	Atu2746	Uncharacterized protein	0.0175648	1	0.0142474
Q7CWC9	Atu2742	Uncharacterized protein	DRM only	0	0.195833
Q7CWD9	chvB Atu2730	Beta (1-->2) glucan biosynthesis protein	DRM only	0	0.529683
Q7CWE5	ispA Atu2721	Geranyltranstransferase	DRM only	0	0.226981
Q7CWF5	Atu2710	Peptidase_M48 domain-containing protein	4.35863	1	0.0303075
Q7CWF6	Atu2708	MFS permease	DRM only	1	0.00550919
Q7CWG2	ffh Atu2697	Signal recognition particle protein (Fifty-four homolog)	1.81846	0	0.128793
Q7CWG4	Atu2696	Lactamase_B domain-containing protein	DRM only	0	0.0711833
Q7CWG5	Atu2694	MTTase N-terminal domain-containing protein	DRM only	0	0.230662
Q7CWI2	Atu2672	Uncharacterized protein	0.0491562	1	0.0201415
Q7CWI9	dcp Atu2664	Peptidyl-dipeptidase	3.94556	1	0.0499258
Q7CWJ5	Atu2656	HemY_N domain-containing protein	1.23541	0	0.65144
Q7CWJ6	Atu2655	Uncharacterized protein	4.88986	1	0.0244776
Q7CWK7	mdh Atu2639 AGR_C_4782	Malate dehydrogenase (EC 1.1.1.37)	0.0618829	0	0.0763102
Q7CWL6	priA Atu2627	Primosomal protein N' (EC 3.6.4.-) (ATP-dependent helicase PriA)	DRM only	0	0.950307
Q7CWL8	atpH Atu2625 AGR_C_4759	ATP synthase subunit delta (ATP synthase F(1) sector subunit delta) (F-type ATPase subunit delta) (F-ATPase subunit delta)	0.0917356	0	0.050178
Q7CWM2	cheD Atu2618	Methyl-accepting chemotaxis protein	DSM only	0	0.274225
Q7CWM4	Atu2616	Uncharacterized protein	DRM only	0	0.935361
Q7CWM5	Atu2615	POTRA domain-containing protein	DRM only	0	0.0615783
Q7CWM8	Atu2611	acidPPc domain-containing protein	DRM only	0	0.183527
Q7CWN4	Atu2604	Oxidoreductase	DRM only	0	0.258377
Q7CWN9	Atu2598	Transcriptional regulator, RpiR family	DRM only	0	0.327535
Q7CWP6	redB Atu2591	Glucosyltransferase	8.94746	1	0.0451479
Q7CWP7	Atu2590	Glyco_tran_28_C domain-containing protein	DRM only	1	0.0363391
Q7CWP9	Atu2588	ABC transporter, membrane spanning protein (Oligopeptide)	DRM only	0	0.188245
Q7CWQ0	Atu2587	ABC transporter, substrate binding protein (Oligopeptide)	DSM only	0	0.196419
Q7CWQ2	Atu2585	Uncharacterized protein	DSM only	0	0.0713707
Q7CWQ8	Atu2578	cAMP-dependent protein kinase regulatory subunit	0.978819	0	0.9346
Q7CWR3	Atu2573 AGR_C_4663	Amino acid--[acyl-carrier-protein] ligase (EC 6.2.1.n2) (Amino acid:[carrier-protein] ligase [AMP forming]) (aa:CP ligase) (Aminoacyl-[acyl-carrier-protein] synthetase) (L-alanine:[acyl-carrier-protein] ligase) (L-glycine:[acyl-carrier-protein] ligase) (L-serine:[acyl-carrier-protein] ligase)	DRM only	0	0.183527
Q7CWS2	modA Atu2561	ABC transporter, substrate binding protein (Molybdate)	DSM only	1	0.0119261
Q7CWS9	nodT Atu2552	Nodulation protein T	16.0829	1	0.0489596
Q7CWT1	Atu2550	RND multidrug efflux membrane permease	8.45219	1	0.000322909
Q7CWV1	telA Atu2523	Protelomerase	DRM only	0	0.145269
Q7CWV4	Atu2519	Dipeptidase	1.38846	0	0.54572
Q7CWX7	mtbA Atu2492	MFS permease	7.28981	1	0.00324787
Q7CWX8	asd Atu2490	Aspartate-semialdehyde dehydrogenase (ASA dehydrogenase) (ASADH) (EC 1.2.1.11) (Aspartate-beta-semialdehyde dehydrogenase)	1.71557	1	0.0206599
Q7CWY3	Atu2485	Endo/exonuclease/phosphatase domain-containing protein	DRM only	0	0.221832
Q7CWZ7	Atu2466	Two component response regulator	DRM only	0	0.183527
Q7CX03	hmuT Atu2460	ABC transporter, substrate binding protein (Hemin)	DRM only	0	0.897467
Q7CX21	Atu2439	Uncharacterized protein	DRM only	0	0.114411
Q7CX34	Atu2425	ABC transporter, nucleotide binding/ATPase protein	2.72096	1	0.0275172
Q7CX36	Atu2422	ABC transporter, substrate binding protein (Amino acid)	DSM only	1	0.00307373
Q7CX48	Atu2409	Uncharacterized protein	DRM only	0	0.307749
Q7CX57	ureG Atu2396 AGR_C_4348	Urease accessory protein UreG	DRM only	1	0.025538
Q7CX59	sinR Atu2394	Regulator of Biofilm formation, Fnr Family	DRM only	0	0.892154
Q7CX61	Atu2392	HlyD family secretion protein	DSM only	1	0.0102432
Q7CX68	amaB Atu2385	N-carbamoyl-beta-alanine amidohydrolase	DSM only	0	0.734794
Q7CX75	Atu2377	Succinoglycan biosynthesis transport protein	DRM only	1	0.0222499
Q7CX76	Atu2375	UDP-hexose transferase	DRM only	0	0.0573772
Q7CX82	Atu2369	Uncharacterized protein	DRM only	0	0.229055
Q7CX89	mcpA Atu2360	Methyl-accepting chemotaxis protein	0.169271	0	0.11467
Q7CXD3	xdhB Atu2310	Xanthine dehydrogenase C-terminal subunit	0.233266	0	0.316016
Q7CXD9	sbmA Atu2304	Bacteroid development protein	DRM only	1	0.0199974
Q7CXE9	Atu2293	Uncharacterized protein	DRM only	0	0.441444
Q7CXG0	Atu2281	ABC transporter, substrate binding protein (Proline/glycine betaine)	DSM only	1	0.00933989
Q7CXG1	Atu2280	ABC transporter, membrane spanning protein (Proline/glycine betaine)	DRM only	1	0.0245973
Q7CXH2	sigD Atu2268	ECF family sigma factor	2.88966	0	0.0532617
Q7CXI2	Atu2254	DUF58 domain-containing protein	5.76634	0	0.164699
Q7CXI6	papS Atu2250	Poly(A) polymerase	7.88483	1	0.0217119
Q7CXJ0	Atu2245	Na+/Pi-cotransporter	DRM only	0	0.116462
Q7CXJ3	Atu2242	ABC transporter, nucleotide binding/ATPase protein	DRM only	1	0.0450714
Q7CXJ4	Atu2241	ABC transporter, nucleotide binding/ATPase protein	DRM only	1	0.0281055
Q7CXJ6	fbcF Atu2239	Ubiquinol-cytochrome c reductase iron-sulfur subunit (EC 7.1.1.8)	1.97307	0	0.0757174
Q7CXJ8	fbcC Atu2237	Cytochrome c1	7.56013	0	0.0704354
Q7CXK1	ychF Atu2233	Ribosome-binding ATPase YchF	5.66732	0	0.0516739
Q7CXK8	aldA Atu2224	Aldehyde dehydrogenase	0.236071	0	0.269625
Q7CXK9	mcpA Atu2223	Methyl-accepting chemotaxis protein	DSM only	0	0.154632
Q7CXL2	Atu2220	PMT_2 domain-containing protein	DRM only	0	0.0645421
Q7CXL3	Atu2217	Uncharacterized protein	1.26529	0	0.775506
Q7CXL8	proC Atu2209	Pyrroline-5-carboxylate reductase (P5C reductase) (P5CR) (EC 1.5.1.2) (PCA reductase)	DRM only	0	0.0660494
Q7CXM1	petR Atu2206	Two component response regulator	1.03623	0	0.966212
Q7CXP1	Atu2181	Elp3 domain-containing protein	DRM only	0	0.303291
Q7CXP8	mcpA Atu2173	Methyl-accepting chemotaxis protein	DSM only	0	0.29903
Q7CXQ0	Atu2171	Hydrolase	DRM only	0	0.183628
Q7CXQ8	Atu2160	Uncharacterized protein	5.87291	0	0.267284
Q7CXR1	Atu2156	Uncharacterized protein	0.980262	0	0.960735
Q7CXR2	metH Atu2155	Methionine synthase (EC 2.1.1.13) (5-methyltetrahydrofolate--homocysteine methyltransferase)	1.59275	0	0.592996
Q7CXS4	Atu2143	ABC transporter, membrane spanning protein (Amino acid)	DRM only	0	0.226981
Q7CXS6	Atu2141	HTH cro/C1-type domain-containing protein	DSM only	0	0.184204
Q7CXS9	Atu2138	Dehydrogenase	1.04027	0	0.909691
Q7CXT9	iivG Atu2128	Acetolactate synthase large subunit	0.302467	0	0.427861
Q7CXU0	caiB Atu2127	L-carnitine dehydratase	DRM only	0	0.123403
Q7CXU1	Atu2126	Hydrolase_4 domain-containing protein	DRM only	0	0.354608
Q7CXV0	pfp Atu2115	Pyrophosphate--fructose 6-phosphate 1-phosphotransferase (EC 2.7.1.90) (6-phosphofructokinase, pyrophosphate dependent) (PPi-dependent phosphofructokinase) (PPi-PFK) (Pyrophosphate-dependent 6-phosphofructose-1-kinase)	1.14499	0	0.760446
Q7CXV1	djlA Atu2114	Molecular chaperone, DnaJ family	DRM only	1	0.0159947
Q7CXV4	solA Atu2111	Sarcosine oxidase	DRM only	0	0.183527
Q7CXV5	solA Atu2110	Sarcosine oxidase	DRM only	0	0.967521
Q7CXW1	Atu2101	Uncharacterized protein	DSM only	0	0.265143
Q7CXX0	bamD Atu2084	Outer membrane protein assembly factor BamD	5.99766	1	0.0188278
Q7CXY5	pncA Atu2066	Pyrazinamidase/nicotinamidase	DRM only	0	0.183628
Q7CXY6	Atu2064	Uncharacterized protein	1.3581	0	0.597677
Q7CXZ1	betI Atu2059	HTH-type transcriptional regulator BetI	14.7236	1	0.0101068
Q7CXZ2	Atu2058	Uncharacterized protein	DRM only	1	0.0407063
Q7CXZ3	pcrA Atu2057	DNA helicase (EC 3.6.4.12)	1.3564	0	0.0648119
Q7CY01	hflK Atu2045	Protein HflK	3.52906	1	0.0244108
Q7CY03	Atu2043	Periplasmic serine endoprotease DegP-like (EC 3.4.21.107)	DSM only	1	0.0169643
Q7CY07	Atu2038	DUF87 domain-containing protein	DRM only	0	0.116462
Q7CY08	ilvI Atu2036	Acetolactate synthase (EC 2.2.1.6)	DRM only	0	0.0520259
Q7CY17	Atu2026	Exodeoxyribonuclease V	1.27742	0	0.732931
Q7CY18	Atu2025	Transcriptional regulator	2.71459	0	0.153382
Q7CY19	ndh Atu2023	NADH dehydrogenase	3.13148	0	0.0812518
Q7CY20	adh Atu2022	NADP-dependent alcohol dehydrogenase	0.676043	0	0.444965
Q7CY37	uvrB Atu2001	UvrABC system protein B (Protein UvrB) (Excinuclease ABC subunit B)	4.84512	1	0.00467245
Q7CY44	Atu1993	tRNA/rRNA metyltransferase	0.175988	1	0.00737681
Q7CY45	Atu1990	Bacteriophytochrome protein	1.32428	0	0.724536
Q7CY47	Atu1988	Two component sensor kinase	DRM only	1	0.00875129
Q7CY49	Atu1986	Histidine kinase (EC 2.7.13.3)	DRM only	0	0.0712386
Q7CY51	fsrR Atu1984	Two component sensor kinase	DRM only	1	0.0216516
Q7CY52	Atu1983	Uncharacterized protein	DRM only	0	0.266518
Q7CY53	sigK Atu1982	Sigma factor	DRM only	0	0.137707
Q7CY61	Atu1973	Uncharacterized protein	DRM only	0	0.151303
Q7CY63	Atu1971	Uncharacterized protein	DSM only	1	0.0463737
Q7CY64	Atu1969	MliC domain-containing protein	DSM only	0	0.202542
Q7CY65	Atu1967	Uncharacterized protein	DRM only	1	0.0175353
Q7CY66	galE Atu1965	UDP-glucose 4-epimerase	DSM only	0	0.798919
Q7CY67	secE Atu1962	Protein translocase subunit SecE	DRM only	0	0.0536387
Q7CY83	prlA secY Atu1927	Protein translocase subunit SecY	14.3472	1	0.000405662
Q7CY88	Atu1915	Periplasmic serine endoprotease DegP-like (EC 3.4.21.107)	0.865715	0	0.485468
Q7CY91	mclA Atu1912	Methyl-accepting chemotaxis protein	DRM only	0	0.183761
Q7CY97	Atu1904	Transcriptional regulator	DRM only	0	0.0842453
Q7CYA9	exoI Atu1887	Succinoglycan biosynthesis protein	DRM only	0	0.268035
Q7CYB9	psuG Atu1876	Pseudouridine-5'-phosphate glycosidase (PsiMP glycosidase) (EC 4.2.1.70)	0.836178	0	0.677117
Q7CYC5	lasT trmJ Atu1868	tRNA (cytidine/uridine-2'-O-)-methyltransferase TrmJ (EC 2.1.1.200) (tRNA (cytidine(32)/uridine(32)-2'-O)-methyltransferase) (tRNA Cm32/Um32 methyltransferase)	2.29182	0	0.190005
Q7CYD3	Atu1857	Inositol monophosphatase family protein	DRM only	0	0.176256
Q7CYE5	Atu1842	Uncharacterized protein	2.70114	0	0.293806
Q7CYE9	Atu1838	ABC transporter, substrate binding protein (Amino acid)	DSM only	0	0.322629
Q7CYF5	Atu1831	Uncharacterized protein	DRM only	0	0.183527
Q7CYG1	sufB Atu1824	ABC transporter subunit	DSM only	0	0.628216
Q7CYG3	sufD Atu1822	Transport system	3.36803	0	0.076578
Q7CYG7	Atu1817	Uncharacterized protein	DRM only	0	0.12244
Q7CYG9	Atu1815	HlyD family secretion protein	5.77025	1	0.00143571
Q7CYH4	Atu1804	Uncharacterized protein	DSM only	1	0.000572473
Q7CYI8	Atu1789	Lipoprotein	DSM only	1	0.0142535
Q7CYI9	Atu1788	Transcriptional regulator, GntR family	DRM only	1	0.000577144
Q7CYK3	Atu1773	Uncharacterized protein	0.108893	0	0.0533856
Q7CYK6	glnB Atu1769	Nitrogen regulatory protein P-II	0.322573	0	0.111164
Q7CYK7	nnrE nnrD Atu1768	Bifunctional NAD(P)H-hydrate repair enzyme (Nicotinamide nucleotide repair protein) [Includes: ADP-dependent (S)-NAD(P)H-hydrate dehydratase (EC 4.2.1.136) (ADP-dependent NAD(P)HX dehydratase); NAD(P)H-hydrate epimerase (EC 5.1.99.6)]	DSM only	1	0.0182436
Q7CYK8	Atu1767	Transcriptional regulator, AraC family	DRM only	0	0.230662
Q7CYL0	Atu1765	Transcriptional regulator, LysR family	2.08758	0	0.285887
Q7CYM0	Atu1751	PNPLA domain-containing protein	0.204841	1	0.0288077
Q7CYM8	Atu1739	Permease	DRM only	0	0.23822
Q7CYM9	Atu1738	ABC transporter, nucleotide binding/ATPase protein	DRM only	0	0.403187
Q7CYN5	Atu1729	Putative molybdenum cofactor biosynthesis protein	1.91796	0	0.377656
Q7CYP2	fadL Atu1717	Long-chain fatty acid transport protein	37.7393	1	0.00179374
Q7CYP7	Atu1710	SPOR domain-containing protein	1.56547	0	0.0907032
Q7CYQ2	pcm Atu1701	L-isoaspartyl protein carboxyl methyltransferase (Protein L-isoaspartyl methyltransferase) (Protein-L-isoaspartate O-methyltransferase) (Protein-beta-aspartate methyltransferase)	1.19067	0	0.819475
Q7CYQ3	Atu1700	Lipoprotein	0.260486	0	0.0892896
Q7CYR2	trpC Atu1688 AGR_C_3101	Indole-3-glycerol phosphate synthase (IGPS) (EC 4.1.1.48)	DRM only	0	0.203643
Q7CYR8	pabB Atu1676	Para-aminobenzoate synthase component I	DRM only	0	0.220301
Q7CYS8	cgmA Atu1658	Conserved protein involved in phosphoglycerol modification of cyclic glucan	DSM only	0	0.288927
Q7CYT6	Atu1647	ABC transporter, membrane spanning protein	DRM only	0	0.20309
Q7CYT7	Atu1646	ABC transporter, nucleotide binding/ATPase protein	DRM only	0	0.221827
Q7CYV1	Atu1624	Transcriptional regulator, TetR family	DRM only	0	0.180594
Q7CYV5	secG Atu1619	Protein-export membrane protein SecG	DRM only	1	0.00631272
Q7CYW3	phbC Atu1604	Poly-beta-hydroxybutyrate synthase	DRM only	0	0.193607
Q7CYX4	Atu1589	Aminotransferase (EC 2.6.1.-)	3.58416	1	0.00739721
Q7CYX5	hom Atu1588	Homoserine dehydrogenase (EC 1.1.1.3)	0.601567	0	0.47288
Q7CYY5	cysE Atu1571	Serine acetyltransferase (EC 2.3.1.30)	13.9757	1	0.030543
Q7CYY9	fdhA Atu1567	Glutathione-independent formaldehyde dehydrogenase	0.383764	0	0.556967
Q7CYZ1	Atu1564	DUF815 domain-containing protein	7.25847	1	0.0323901
Q7CYZ3	secD secF Atu1562	Multifunctional fusion protein [Includes: Protein translocase subunit SecD; Protein-export membrane protein SecF]	7.10065	1	0.00215504
Q7CYZ6	Atu1559	Uncharacterized protein	DRM only	0	0.271366
Q7CZ03	mgtE Atu1547	Magnesium transporter MgtE	DRM only	0	0.31942
Q7CZ06	Atu1544	Uncharacterized protein	DRM only	0	0.181675
Q7CZ11	fixN Atu1537	Cytochrome-c oxidase (EC 7.1.1.9)	DRM only	0	0.0923407
Q7CZ22	Atu1524	Aldo_ket_red domain-containing protein	DSM only	0	0.0925769
Q7CZ23	manA Atu1523	Beta-mannosidase	DSM only	0	0.282111
Q7CZ24	Atu1522	Transcriptional regulator, LacI family	DRM only	1	0.0226694
Q7CZ27	znuB Atu1519	ABC transporter, membrane spanning protein (Zinc)	DRM only	0	0.407112
Q7CZ32	Atu1514	Uncharacterized protein	0.505118	0	0.182707
Q7CZ37	gyrA Atu1507	DNA gyrase subunit A (EC 5.6.2.2)	0.432319	0	0.354696
Q7CZ41	Atu1501	Uncharacterized protein	0.104799	0	0.270969
Q7CZ43	dac Atu1499	Serine-type D-Ala-D-Ala carboxypeptidase (EC 3.4.16.4)	DSM only	0	0.160709
Q7CZ44	holB Atu1497	DNA polymerase III, delta prime subunit	DRM only	0	0.220554
Q7CZ51	arsH Atu1489	Arsenical resistance protein	DSM only	1	0.0433209
Q7CZ66	rluC Atu1471	Pseudouridine synthase (EC 5.4.99.-)	0.506404	0	0.0904464
Q7CZ80	mazG Atu1452	Uncharacterized protein	0.061331	1	0.0192965
Q7CZ83	ntrY Atu1447	Nitrogen regulation protein (EC 2.7.13.3)	DRM only	0	0.125351
Q7CZ96	aceF Atu1432	Dihydrolipoamide acetyltransferase	0.472341	0	0.128832
Q7CZ97	Atu1431	Uncharacterized protein	0.51228	0	0.413187
Q7CZ99	pdhA Atu1429	Pyruvate dehydrogenase E1 component subunit alpha (EC 1.2.4.1)	0.910427	0	0.305415
Q7CZA0	Atu1428	Uncharacterized protein	0.298934	0	0.129931
Q7CZA3	Atu1421	Amidohydro-rel domain-containing protein	3.76777	0	0.074388
Q7CZA8	Atu1416	Long-chain-fatty-acid-CoA-ligase	DRM only	0	0.244465
Q7CZC9	Atu1393	Uncharacterized protein	1.3581	0	0.597677
Q7CZE0	Atu1373	Uncharacterized protein	DSM only	0	0.221178
Q7CZE6	Atu1367	Transcriptional regulator, LysR family	DRM only	1	0.0487707
Q7CZE9	Atu1362	Histidine kinase (EC 2.7.13.3)	1.87861	0	0.174581
Q7CZF1	Atu1360	Uncharacterized protein	0.711332	0	0.64291
Q7CZF4	Atu1357	Uncharacterized protein	8.48462	1	0.00229953
Q7CZG0	fdx Atu1350	Ferrodoxin	DRM only	0	0.184602
Q7CZH0	amiA Atu1340	N-acetylmuramoyl-L-alanine amidase (EC 3.5.1.28)	DRM only	0	0.684409
Q7CZH1	rne Atu1339	Ribonuclease E (RNase E) (EC 3.1.26.12)	1.08742	0	0.886789
Q7CZK1	Atu1293	Uncharacterized protein	DRM only	0	0.16754
Q7CZK7	Atu1285	Metal dependent hydrolase	0.388937	1	0.00270144
Q7CZK9	nuoN Atu1283	NADH-quinone oxidoreductase subunit N (EC 7.1.1.-) (NADH dehydrogenase I subunit N) (NDH-1 subunit N)	DRM only	1	0.0339368
Q7CZL6	nuoG Atu1276	NADH-quinone oxidoreductase (EC 7.1.1.-)	0.345442	0	0.104072
Q7CZM8	Atu1257	GGDEF family protein	DRM only	0	0.17583
Q7CZN9	ctaA cox15 Atu1242 AGR_C_2290	Heme A synthase (HAS) (EC 1.3.-.-) (Cytochrome aa3-controlling protein)	DRM only	1	0.0103823
Q7CZP4	Atu1237	Glycosyl transferase	DRM only	0	0.409839
Q7CZP5	Atu1236	Polysaccharide biosynthesis glycosyltransferase	DRM only	0	0.426022
Q7CZP8	Atu1232	Uncharacterized protein	3.38712	0	0.0505541
Q7CZP9	Atu1227	Uncharacterized protein	DRM only	0	0.183527
Q7CZQ0	exoD Atu1226	ExoD protein	DRM only	0	0.102535
Q7CZQ3	Atu1220	Methylated-DNA--[protein]-cysteine S-methyltransferase (EC 2.1.1.63)	13.6428	1	0.000495431
Q7CZR0	Atu1213	Uncharacterized protein	DRM only	0	0.621486
Q7CZR5	Atu1206	Uncharacterized protein	2.54316	0	0.0919722
Q7CZR6	ilvA Atu1205	L-threonine dehydratase (EC 4.3.1.19) (Threonine deaminase)	DRM only	0	0.646914
Q7CZT4	Atu1181	HTH merR-type domain-containing protein	0.461389	1	0.0380582
Q7CZT5	Atu1177	Uncharacterized protein	2.59132	0	0.362617
Q7CZT6	Atu1176	Uncharacterized protein	DSM only	0	0.296235
Q7CZT7	Atu1175	SmpA_OmlA domain-containing protein	38.6	1	0.0139441
Q7CZU1	ribc Atu1169	Riboflavin synthase alpha chain	DRM only	1	0.0242398
Q7CZV4	rnd Atu1151	Ribonuclease D (RNase D) (EC 3.1.13.5)	0.536118	0	0.553764
Q7CZW1	ppk Atu1144	Polyphosphate kinase (EC 2.7.4.1) (ATP-polyphosphate phosphotransferase) (Polyphosphoric acid kinase)	0.134205	0	0.216591
Q7CZW8	rlmJ Atu1135	Ribosomal RNA large subunit methyltransferase J (EC 2.1.1.266) (23S rRNA (adenine(2030)-N6)-methyltransferase) (23S rRNA m6A2030 methyltransferase)	0.292178	0	0.132209
Q7CZX0	rns Atu1133	Ribonuclease	DRM only	0	0.183527
Q7CZY1	Atu1119	GGDEF domain-containing protein	0.738548	0	0.718999
Q7CZY2	Atu1118	ABC transporter, nucleotide binding/ATPase protein	2.45263	1	0.0224767
Q7CZY5	Atu1115	Histidine kinase (EC 2.7.13.3)	DRM only	0	0.197868
Q7CZY6	Atu1114	GGDEF family protein	DSM only	0	0.356497
Q7CZY8	Atu1112	GGDEF domain-containing protein	DRM only	0	0.12775
Q7CZZ6	mltG Atu1099	Endolytic murein transglycosylase (EC 4.2.2.-) (Peptidoglycan polymerization terminase)	14.3642	1	0.000820672
Q7CZZ8	fabF Atu1097	3-oxoacyl-[acyl-carrier-protein] synthase 2 (EC 2.3.1.179)	0.551608	0	0.468466
Q7D001	Atu1093	Aldo/keto reductase	DSM only	0	0.107402
Q7D003	Atu1087	Secretion protein	6.50085	1	1.19971e-05
Q7D019	Atu1064	ABC transporter, nucleotide binding/ATPase protein	DRM only	1	0.0390082
Q7D020	pssA Atu1062	CDP-diacylglycerol--serine O-phosphatidyltransferase (EC 2.7.8.8) (Phosphatidylserine synthase)	DRM only	1	0.0035588
Q7D021	Atu1060	Two component response regulator	DRM only	1	0.0401256
Q7D038	Atu1042	MOSC domain-containing protein	DRM only	1	0.0280495
Q7D045	Atu1030	GTP pyrophosphokinase rsh	19.2356	1	0.0317877
Q7D046	Atu1028	NYN domain-containing protein	1.07844	0	0.843356
Q7D048	Atu1022	Soluble lytic transglycosylase	DRM only	0	0.446627
Q7D054	hisC Atu1011	Histidinol-phosphate aminotransferase	DRM only	0	0.224702
Q7D066	Atu0995	Uncharacterized protein	DRM only	0	0.859147
Q7D071	Atu0990	NAD/NADP dependent oxidoreductase	DSM only	1	0.000711271
Q7D073	Atu0988	Molecular chaperone, Hsp70 family	DRM only	0	0.129136
Q7D083	cycL Atu0976	Cytochrome c-type biogenesis protein	DRM only	1	0.0341603
Q7D087	lipA Atu0972	LipA protein	21.5093	1	0.0150527
Q7D089	Atu0970	Two component response regulator	0.575566	0	0.0689108
Q7D0A2	Atu0953	Stress-response A/B barrel domain-containing protein	DSM only	0	0.248865
Q7D0A3	Atu0951	Large terminase phage packaging protein	DRM only	0	0.668881
Q7D0D2	Atu0917	Bac_DnaA_C domain-containing protein	DRM only	0	0.646939
Q7D0D7	mnhD Atu0912	Na+/H+ antiporter	DSM only	0	0.291864
Q7D0F7	Atu0888	Transcriptional regulator, MerR family	DRM only	0	0.301357
Q7D0H1	mcpC Atu0872	Methyl-accepting chemotaxis protein	DRM only	0	0.069093
Q7D0J3	Atu0848	DUF2384 domain-containing protein	DRM only	0	0.183527
Q7D0J6	Atu0845	YkuD domain-containing protein	1.63996	0	0.183884
Q7D0J8	Atu0843	P type cation (Metal) transporter, ATPase component	0.320873	0	0.456832
Q7D0J9	Atu0842	Uncharacterized protein	DRM only	0	0.0717701
Q7D0K1	Atu0840	DNA ligase (ATP) (EC 6.5.1.1)	DRM only	0	0.183527
Q7D0K3	Atu0838	MFS permease	DRM only	1	0.0255533
Q7D0K4	Atu0837	Transcriptional regulator, MarR family	0.348363	0	0.231167
Q7D0K8	Atu0832	Chloride channel protein	DRM only	0	0.226981
Q7D0L3	qor Atu0825	Quinone oxidoreductase	0.909295	0	0.923207
Q7D0L8	cysD Atu0817 AGR_C_1496	Sulfate adenylyltransferase subunit 2 (EC 2.7.7.4) (ATP-sulfurylase small subunit) (Sulfate adenylate transferase) (SAT)	DRM only	0	0.390223
Q7D0M5	Atu0804	Proton/glutamate transport protein	5.52451	1	0.000493682
Q7D0M6	ppdK Atu0803	Pyruvate, phosphate dikinase (EC 2.7.9.1)	DRM only	0	0.218164
Q7D0M8	smc Atu0801	Chromosome partition protein Smc	1.0322	0	0.958681
Q7D0N2	Atu0796	Putative peptidase	DRM only	0	0.236423
Q7D0P0	Atu0786	Peptidase, family M16	DSM only	0	0.0685162
Q7D0Q4	coxB Atu0767	Cytochrome c oxidase subunit 2 (EC 7.1.1.9)	5.43701	1	0.0374561
Q7D0Q6	tldD Atu0765	TldD	3.02163	0	0.271642
Q7D0R3	dnaJ Atu0758	Molecular chaperone, DnaJ family	DRM only	0	0.100002
Q7D0R6	aroC Atu0754 AGR_C_1368	Chorismate synthase (CS) (EC 4.2.3.5) (5-enolpyruvylshikimate-3-phosphate phospholyase)	DSM only	0	0.0686313
Q7D0R9	Atu0751	ABC transporter, nucleotide binding/ATPase protein (Cobalt)	DRM only	0	0.0521643
Q7D0T0	mcpG Atu0738	Chemotaxis methyl-accepting protein	DRM only	0	0.629504
Q7D0T7	Atu0730	Lectin-like protein BA14k	2.81268	1	0.0281641
Q7D0U4	Atu0722	Uncharacterized protein	DRM only	0	0.226981
Q7D0U5	Atu0721	Elp3 domain-containing protein	DRM only	0	0.634693
Q7D0U9	atpF2 atpG Atu0716 AGR_C_1299	ATP synthase subunit b 2 (ATP synthase F(0) sector subunit b 2) (ATPase subunit I 2) (F-type ATPase subunit b 2) (F-ATPase subunit b 2)	7.3358	1	0.000802424
Q7D0V3	Atu0712	Hydrolase_2 domain-containing protein	0.694929	0	0.699795
Q7D0V6	Atu0709	Iron-sulfur cluster carrier protein	3.69356	1	0.0380448
Q7D0V9	kdgR Atu0706	Transcriptional regulator, IclR family	DRM only	1	0.0309823
Q7D0W5	Atu0700	Two component sensor kinase	0.770995	0	0.465491
Q7D0X0	Atu0693	PmbA/TldD related protein	0.822436	0	0.744342
Q7D0X6	Atu0687	Uncharacterized protein	76.5508	0	0.0993889
Q7D0Z0	Atu0669	YkuD domain-containing protein	DSM only	1	0.0136078
Q7D0Z3	glcE Atu0666	Glycolate oxidase subunit	0.69485	0	0.608352
Q7D102	Atu0657	Ribosomal RNA small subunit methyltransferase E (EC 2.1.1.193)	DSM only	0	0.0507105
Q7D105	Atu0653	Uncharacterized protein	0.920657	0	0.799494
Q7D110	Atu0648	S1 motif domain-containing protein	0.358932	0	0.270265
Q7D111	mcpA Atu0646	Methyl-accepting chemotaxis protein A	DRM only	0	0.304761
Q7D114	Atu0643	Uncharacterized protein	2.79666	0	0.0842175
Q7D119	sohB Atu0637	Proteinase sohB	0.270232	0	0.0663986
Q7D122	ispB Atu0634	Octaprenyl-diphosphate synthase	40.9588	0	0.0567593
Q7D123	Atu0633	Uncharacterized protein	0.11873	1	0.000476291
Q7D130	guaB Atu0624	Inosine-5'-monophosphate dehydrogenase (IMP dehydrogenase) (IMPD) (IMPDH) (EC 1.1.1.205)	0.656659	0	0.0665118
Q7D134	Atu0619	Exopolyphosphatase	2.91011	0	0.108718
Q7D135	Atu0614	Histidine kinase (EC 2.7.13.3)	10.8365	0	0.338517
Q7D143	Atu0606	Uncharacterized protein	DSM only	0	0.196419
Q7D145	Atu0603	Uncharacterized protein	0.264312	0	0.101522
Q7D146	glnA Atu0602	Glutamine synthetase	4.82989	1	0.0230851
Q7D148	zwf Atu0600	Glucose-6-phosphate 1-dehydrogenase (G6PD) (EC 1.1.1.49)	0.401916	0	0.15065
Q7D149	pgl Atu0599	6-phosphogluconolactonase (6PGL) (EC 3.1.1.31)	0.560668	0	0.369013
Q7D153	aglA Atu0594	Alpha-glucosidase	DRM only	0	0.220301
Q7D155	aglF Atu0592	ABC transporter, membrane spanning protein	DRM only	0	0.190887
Q7D165	flhA Atu0581	Flagellar biosynthesis protein FlhA	DRM only	0	0.415301
Q7D176	Atu0570	Chemotaxis protein	DRM only	0	0.221827
Q7D179	flaD Atu0567	Flagellin	0.783946	0	0.135491
Q7D182	Atu0559	Uncharacterized protein	0.56109	0	0.66925
Q7D186	fliL Atu0547	Flagellar protein FliL	DRM only	0	0.208971
Q7D191	Atu0538	Uncharacterized protein	1.00609	0	0.995733
Q7D196	aspB Atu0529	Aminotransferase (EC 2.6.1.-)	DRM only	0	0.271366
Q7D1A0	agrR Atu0525	Transcriptional regulator, LuxR family	DRM only	0	0.344369
Q7D1A6	cheR Atu0518	Chemotaxis protein methyltransferase (EC 2.1.1.80)	DRM only	0	0.22384
Q7D1B0	Atu0514	Methyl-accepting chemotaxis protein	1.91614	0	0.510253
Q7D1B3	phaD Atu0510	pH adaption potassium efflux system protein	DRM only	0	0.0813276
Q7D1B4	phaE Atu0509	PhaE protein	DRM only	0	0.127723
Q7D1C3	Atu0499	PG_binding_1 domain-containing protein	0.426114	0	0.430915
Q7D1C7	lhr Atu0494	Large atp-dependant helicase-related protein	DRM only	0	0.0534915
Q7D1D3	Atu0488	Uncharacterized protein	DRM only	0	0.301357
Q7D1E0	Atu0480	Polysaccharide biosynthesis protein	DRM only	0	0.183761
Q7D1E1	Atu0479	ABC transporter, substrate binding protein (Amino acid)	DSM only	0	0.0898409
Q7D1E2	Atu0478	Glycosyltransferase	0.170674	0	0.137332
Q7D1E5	Atu0475	Uncharacterized protein	DRM only	1	0.0263268
Q7D1E6	Atu0474	Putative RNA polymerase sigma-70 factor	6.43745	0	0.396189
Q7D1F2	Atu0462	Endolysin	3.74444	0	0.0896597
Q7D1G6	intD Atu0438	Phage-related integrase	DRM only	0	0.22384
Q7D1H9	Atu0419	Histidine kinase (EC 2.7.13.3)	DRM only	0	0.0821976
Q7D1J3	Atu0397	Uncharacterized protein	7.05017	1	0.0473945
Q7D1J4	Atu0396	Coenzyme A transferase	DRM only	0	0.188919
Q7D1J9	Atu0391	ABC transporter, nucleotide binding/ATPase protein	DRM only	0	0.629504
Q7D1K6	Atu0377	Uncharacterized protein	DSM only	0	0.173757
Q7D1L0	Atu0373	Methyl-accepting chemotaxis protein	DRM only	0	0.610751
Q7D1L1	Atu0372	AMP nucleosidase (EC 3.2.2.4)	DSM only	1	0.00203513
Q7D1L8	Atu0361	Transcriptional regulator	DSM only	1	0.00216482
Q7D1M0	Atu0359	Hemolysin	DSM only	0	0.204769
Q7D1M1	phoH Atu0357	Phosphate starvation inducible protein	0.213726	1	0.00463764
Q7D1M2	miaB Atu0356 AGR_C_623	tRNA-2-methylthio-N(6)-dimethylallyladenosine synthase (EC 2.8.4.3) ((Dimethylallyl)adenosine tRNA methylthiotransferase MiaB) (tRNA-i(6)A37 methylthiotransferase)	DRM only	1	0.000222978
Q7D1M9	mviN murJ Atu0347	Probable lipid II flippase MurJ	DRM only	0	0.255585
Q7D1N2	barA Atu0343	Histidine kinase (EC 2.7.13.3)	DRM only	0	0.14338
Q7D1N4	trmH Atu0341	rRNA methylase	0.452187	0	0.276441
Q7D1N8	Atu0335	Uncharacterized protein	4.53297	1	0.0106817
Q7D1N9	Atu0334	OstA-like_N domain-containing protein	0.302677	1	0.0427184
Q7D1P1	hpf Atu0331	Ribosome hibernation promoting factor (HPF)	0.920329	0	0.838992
Q7D1P3	hemN Atu0325	Heme chaperone HemW	DRM only	0	0.192572
Q7D1P4	fadB Atu0322	Enoyl CoA hydratase	0.028716	1	0.0440896
Q7D1P8	dfp coaBC Atu0316	Coenzyme A biosynthesis bifunctional protein CoaBC (DNA/pantothenate metabolism flavoprotein) (Phosphopantothenoylcysteine synthetase/decarboxylase) (PPCS-PPCDC) [Includes: Phosphopantothenoylcysteine decarboxylase (PPC decarboxylase) (PPC-DC) (EC 4.1.1.36) (CoaC); Phosphopantothenate--cysteine ligase (EC 6.3.2.5) (CoaB) (Phosphopantothenoylcysteine synthetase) (PPC synthetase) (PPC-S)]	0.18332	0	0.14094
Q7D1Q2	Atu0311	AAA domain-containing protein	DSM only	0	0.184204
Q7D1Q9	rsmI Atu0302	Ribosomal RNA small subunit methyltransferase I (EC 2.1.1.198) (16S rRNA 2'-O-ribose C1402 methyltransferase) (rRNA (cytidine-2'-O-)-methyltransferase RsmI)	0.213446	0	0.277413
Q7D1R0	dnaN Atu0301	Beta sliding clamp	0.160704	1	0.0168647
Q7D1R4	Atu0296	NADH-ubiquinone oxidoreductase	3.15788	1	6.63216e-05
Q7D1T6	Atu0270	Mandelate racemase / muconate lactonizing enzyme family protein	0.0989669	1	0.000523648
Q7D1T9	Atu0266	Oxidoreductase	DRM only	0	0.0740764
Q7D1U5	Atu0257	Uncharacterized protein	DRM only	1	0.0382333
Q7D1V9	Atu0239	Transcriptional regulator, AraC family	DRM only	0	0.272767
Q7D1W5	Atu0233	Lysozyme	0.173641	1	0.0282871
Q7D1X7	ctpG Atu0218	Component of type IV pilus	2.70625	0	0.28486
Q7D1Y4	Atu0210	HTH marR-type domain-containing protein	DSM only	0	0.202542
Q7D1Z0	Atu0203	Peptidase_M48 domain-containing protein	DRM only	0	0.251209
Q7D203	Atu0189	ABC transporter, membrane spanning protein (Peptide)	DRM only	1	0.0314131
Q7D219	Atu0170	Uncharacterized protein	DRM only	0	0.127674
Q7D228	Atu0159	ABC transporter, nucleotide binding/ATPase protein	DRM only	0	0.18307
Q7D235	fabA Atu0151 AGR_C_246	3-hydroxydecanoyl-[acyl-carrier-protein] dehydratase (EC 4.2.1.59) (3-hydroxyacyl-[acyl-carrier-protein] dehydratase FabA) (Beta-hydroxydecanoyl thioester dehydrase) (Trans-2-decenoyl-[acyl-carrier-protein] isomerase) (EC 5.3.3.14)	DSM only	0	0.205081
Q7D236	fabB Atu0150	3-oxoacyl-(Acyl-carrier-protein) synthase	0.719095	0	0.38644
Q7D237	fabI Atu0149	Enoyl-[acyl-carrier-protein] reductase [NADH] (EC 1.3.1.9)	0.492807	1	0.015917
Q7D240	gltB Atu0145	Glutamate synthase large subunit	DRM only	1	0.0269926
Q7D242	cyoA Atu0142	Ubiquinol oxidase subunit 2	3.33357	0	0.166943
Q7D245	cyoD Atu0139	Cytochrome bo(3) ubiquinol oxidase subunit 4 (Cytochrome o ubiquinol oxidase subunit 4) (Oxidase bo(3) subunit 4) (Ubiquinol oxidase polypeptide IV) (Ubiquinol oxidase subunit 4)	DRM only	0	0.151844
Q7D246	surf Atu0138	SURF1-like protein	DRM only	0	0.124026
Q7D253	Atu0127	ABC transporter, nucleotide binding/ATPase protein (Sugar/ribonucleotide)	DRM only	0	0.0664968
Q7D255	msrA Atu0125 AGR_C_197	Peptide methionine sulfoxide reductase MsrA (Protein-methionine-S-oxide reductase) (EC 1.8.4.11) (Peptide-methionine (S)-S-oxide reductase) (Peptide Met(O) reductase)	1.43862	0	0.307979
Q7D261	dctD Atu0114	Two component response regulator	DRM only	0	0.0620013
Q7D262	Atu0113	C4-dicarboxylate transport sensor protein (EC 2.7.13.3)	DSM only	0	0.473379
Q7D266	Atu0108	Putative metalloprotease M20 family	4.17728	0	0.0503737
Q7D273	pheA Atu0099	Prephenate dehydratase (EC 4.2.1.51)	DRM only	0	0.22384
Q7D284	rsmC Atu0081	Ribosomal RNA small subunit methyltransferase	0.542678	1	0.00307618
Q7D290	moeB Atu0074	Molybdopterin biosynthesis protein	DRM only	0	0.093238
Q7D292	nrdF Atu0071	Ribonucleoside-diphosphate reductase subunit beta (EC 1.17.4.1)	DRM only	1	0.00600079
Q7D293	nrdE Atu0070	Ribonucleoside-diphosphate reductase (EC 1.17.4.1)	2.21124	0	0.0832755
Q7D2A3	hrpB Atu0052	Helicase	7.86764	0	0.142237
Q7D2A4	actS Atu0051	Histidine kinase (EC 2.7.13.3)	DRM only	0	0.392879
Q7D2B0	chvI Atu0034	Two component response regulator	1.03289	0	0.933264
Q7D2B8	uvrD Atu0023	DNA helicase (EC 3.6.4.12)	1.10531	0	0.755038
Q7D2B9	trxA Atu0022	Thioredoxin	DSM only	0	0.229737
Q7D2C0	folC Atu0021	Dihydrofolate synthase/folylpolyglutamate synthase (EC 6.3.2.12) (Folylpoly-gamma-glutamate synthetase-dihydrofolate synthetase) (Folylpolyglutamate synthetase)	DRM only	0	0.0692653
Q7D2D0	Atu0008	Tim44 domain-containing protein	13.4223	1	0.00133342
Q7D2E6	Atu6147	Uncharacterized protein	DRM only	0	0.100088
Q7D2E9	accF Atu6144	Agrocinopine phosphodiesterase	DRM only	0	0.0725207
Q7D2G8	ycf Atu6116	Uncharacterized protein	DRM only	0	0.0668048
Q7D2H9	Atu6105	Uncharacterized protein	DRM only	0	0.183761
Q7D2I5	Atu6099	Uncharacterized protein	DRM only	0	0.221827
Q7D2I8	Atu6096	DUF3991 domain-containing protein	DRM only	0	0.687861
Q7D2J0	Atu6094	Uncharacterized protein	DRM only	0	0.321952
Q7D2K3	Atu6081	Uncharacterized protein	DSM only	0	0.281847
Q7D2S6	Atu6194	Nudix hydrolase domain-containing protein	DRM only	0	0.273524
Q7D2T7	Atu5541	Uncharacterized protein	DRM only	0	0.183761
Q7D2U9	Atu5528	Blue-light-activated histidine kinase	6.7453	1	0.00820165
Q7D2W6	Atu5509	Histidine kinase (EC 2.7.13.3)	3.10983	1	0.0136279
Q7D2W7	gst Atu5508	Glutathione S-transferase	DRM only	0	0.0898315
Q7D2W8	ggt Atu5507	Gamma-glutamyltranspeptidase	DRM only	0	0.0746484
Q7D2Y4	catE Atu5491	Catalase (EC 1.11.1.6)	DSM only	0	0.260556
Q7D2Y9	Atu5483	Transcriptional regulator, GntR family	0.234329	0	0.101727
Q7D317	attG Atu5453	ABC transporter, membrane spanning protein	DRM only	1	0.0209188
Q7D321	hspAT2 Atu5449	Heat-shock protein	DRM only	0	0.0521643
Q7D323	Atu5447	Zinc-binding oxidoreductase	DRM only	0	0.0664352
Q7D343	nahD Atu5425	2-hydroxychromene-2-carboxylate isomerase (EC 5.99.1.4)	DRM only	0	0.158307
Q7D356	Atu5411	ABC transporter, substrate binding protein	0.031541	0	0.171477
Q7D375	Atu5390	Transcriptional regulator, AraC family	DRM only	0	0.317551
Q7D376	Atu5389	Non-heme haloperoxidase	DRM only	0	0.164389
Q7D3A2	Atu5354	Autotransporting virulence factor family member	DRM only	0	0.226981
Q7D3A4	tnp Atu5352	Transposase and inactivated derivatives, TnpA family	DSM only	0	0.202542
Q7D3A9	Atu5347	ABC transporter, nucleotide binding/ATPase protein (Oligopeptide)	2.04069	0	0.32605
Q7D3B2	lcdH Atu5344	L-carnitine dehydrogenase (CDH) (L-CDH) (EC 1.1.1.108)	DRM only	0	0.183628
Q7D3B7	Atu5338	Transcriptional regulator. AraC family	DRM only	0	0.244493
Q7D3E2	Atu5307	Citrate synthase (unknown stereospecificity) (EC 2.3.3.16)	DRM only	0	0.106998
Q7D3H3	Atu5266	Two component sensor kinase	DRM only	0	0.154714
Q7D3I0	Atu5259	Transcriptional regulator, LysR family	DRM only	0	0.0945645
Q7D3I1	Atu5258	Beta-lactamase domain-containing protein	DRM only	0	0.220301
Q7D3J6	Atu5243	Transcriptional regulator, DeoR family	DRM only	1	0.0370871
Q7D3N1	Atu5206	Transcriptional regulator, LysR family	DRM only	0	0.0813276
Q7D3N2	Atu5205	Uncharacterized protein	DRM only	0	0.183628
Q7D3Q4	Atu5183	F420_oxidored domain-containing protein	0.559589	0	0.541729
Q7D3R2	avhB11 Atu5172	Type IV secretion system protein	DRM only	0	0.291462
Q7D3R3	avhB10 Atu5171	Type IV secretion protein AvhB10	DRM only	0	0.344764
Q7D3R4	avhB9 Atu5170	Type IV secretion protein AvhB9	DRM only	0	0.215047
Q7D3R5	avhB8 Atu5169	Type IV secretion system protein virB8	5.07743	0	0.281581
Q7D3R9	avhB4 Atu5165	Type IV secretion system protein virB4	1.52973	0	0.705691
Q7D3S6	atsC Atu5156	Short chain dehydrogenase dehydrogenases	1.7433	0	0.126506
Q7D3U0	attM blcC Atu5139 AGR_pAT_200	N-acyl homoserine lactonase AttM (AHL-lactonase AttM) (EC 3.1.1.81)	DRM only	0	0.562664
Q7D3V8	Atu5117	HEPN domain-containing protein	0.743125	0	0.710953
Q7D3W2	traA Atu5111	Conjugal transfer protein	0.228179	0	0.294878
Q7D3W9	Atu5102	Uncharacterized protein	DRM only	0	0.183628
Q7D3X8	rcdB Atu5091	Curdlan synthesis protein	11.0841	1	0.0200567
Q7D3Y0	Atu5089	Uncharacterized protein	DRM only	1	0.0320799
Q7D3Y2	Atu5086	Uncharacterized protein	1.88806	0	0.280324
Q7D410	Atu5055	3'-phosphoesterase (EC 6.5.1.1) (DNA repair polymerase) (NHEJ DNA polymerase) (Polydeoxyribonucleotide synthase [ATP]) (Polymerase/primase)	DRM only	0	0.17583
Q7D421	Atu5042	Recombinase	DRM only	0	0.751444
Q7D427	Atu5033	Uncharacterized protein	DRM only	0	0.795531
Q7D429	Atu5031	Mrr_cat domain-containing protein	DRM only	0	0.253408
Q7D433	Atu5023	Uncharacterized protein	DSM only	0	0.196419
Q7D446	socR Atu5007	Santhopine-responsive transcriptional repressor	DRM only	0	0.355819
Q8U4U5	Atu8183	Uncharacterized protein	DRM only	0	0.138215
Q8U4V1	celG Atu8186	Cellulose synthesis protein	0.697556	0	0.767406
Q8U4V2	Atu8187	Uncharacterized protein	DRM only	0	0.082363
Q8U4V3	Atu3319	Uncharacterized protein	DRM only	0	0.274591
Q8U4V6	Atu8094	COX4_pro_2 domain-containing protein	DRM only	0	0.069093
Q8U4V9	Atu8188	Acetyltransf_6 domain-containing protein	DRM only	0	0.137707
Q8U4W3	Atu8189	Uncharacterized protein	DSM only	0	0.12417
Q8U4W5	Atu8095	Uncharacterized protein	DRM only	1	9.95109e-05
Q8U4W9	Atu3658	Transcriptional regulator, MerR family	2.91492	0	0.515933
Q8U4X1	Atu8191	Uncharacterized protein	DRM only	0	0.1195
Q8U4X2	Atu8192	Uncharacterized protein	0.921287	0	0.914496
Q8U4X3	Atu3761	Uncharacterized protein	DSM only	0	0.439602
Q8U4Y6	Atu8037	Uncharacterized protein	0.0635604	0	0.184435
Q8U4Z6	Atu4370	ABC transporter, nucleotide binding/ATPase protein (Sugar)	DRM only	0	0.298351
Q8U502	Atu4613	Glycosyltransferase	DRM only	0	0.0649906
Q8U504	Atu4671	Two component response regulator	DSM only	0	0.209631
Q8U507	Atu8200	Uncharacterized protein	DRM only	0	0.320245
Q8U529	Atu8182	Uncharacterized protein	DSM only	0	0.0509066
Q8U531	Atu2640	Uncharacterized protein	6.01013	0	0.269897
Q8U533	Atu2629	Uncharacterized protein	DRM only	0	0.538463
Q8U537	Atu8179	Uncharacterized protein	DRM only	1	0.00964026
Q8U542	Atu8177	Uncharacterized protein	DRM only	0	0.158109
Q8U544	ureD Atu2408 AGR_C_4369	Urease accessory protein UreD	DRM only	0	0.199981
Q8U553	Atu8175	Putative transmembrane protein, RNA-binding region RNP-1 (RNA recognition motif)	DRM only	1	0.0222724
Q8U555	Atu8173	Uncharacterized protein	0.28024	0	0.325954
Q8U559	chvD ettA Atu2125	Energy-dependent translational throttle protein EttA (EC 3.6.1.-) (Translational regulatory factor EttA)	DRM only	1	0.0154539
Q8U561	Atu8171	Uncharacterized protein	1.8754	1	0.0336695
Q8U562	Atu8170	Uncharacterized protein	0.0423035	1	0.0248115
Q8U573	Atu8167	Putative transmembrane protein	1.50418	0	0.56995
Q8U599	Atu1632	Dimethylglycine dehydrogenase	1.92449	0	0.646541
Q8U5A0	Atu8160	DUF2059 domain-containing protein	DSM only	0	0.221901
Q8U5A1	Atu8159	Uncharacterized protein	DRM only	1	0.0183002
Q8U5A7	Atu8090	Uncharacterized protein	DRM only	0	0.230662
Q8U5B2	hflx hflX Atu1451	GTPase HflX (GTP-binding protein HflX)	0.944226	0	0.944271
Q8U5D8	ribD* Atu8148	5-amino-6-(5-phosphoribosylamino)uracil reductase (EC 1.1.1.193) (EC 3.5.4.26) (Diaminohydroxyphosphoribosylaminopyrimidine deaminase) (HTP reductase) (Riboflavin biosynthesis protein RibD) (Riboflavin-specific deaminase)	DRM only	0	0.559177
Q8U5E3	cvpA Atu1076	Colicin V production protein	5.27659	0	0.176384
Q8U5E4	Atu1074	NAD/NADP dependent oxidoreductase	0.88561	0	0.478701
Q8U5E6	Atu8147	LysM domain-containing protein	4.2959	1	0.0259053
Q8U5F3	Atu8146	Uncharacterized protein	DRM only	1	0.0286154
Q8U5F8	amn Atu1006	AMP nucleosidase (EC 3.2.2.4)	2.1352	0	0.595911
Q8U5I3	Atu8136	Uncharacterized protein	DRM only	0	0.183628
Q8U5I4	coxA Atu0768	Cytochrome c oxidase subunit 1 (EC 7.1.1.9)	DRM only	0	0.324938
Q8U5J1	Atu8134	Uncharacterized protein	DRM only	0	0.32992
Q8U5J7	phaA Atu8131	pH adaption potassium efflux system protein	DRM only	0	0.34784
Q8U5K0	Atu8130	Uncharacterized protein	DRM only	0	0.129002
Q8U5K1	Atu8129	SCP domain-containing protein	DRM only	0	0.138215
Q8U5K5	Atu8127	Uncharacterized protein	1.29704	0	0.663719
Q8U5K9	Atu8083	Uncharacterized protein	DRM only	0	0.260406
Q8U5L5	Atu8123	Uncharacterized protein	DRM only	0	0.183761
Q8U5L9	Atu8122	Uncharacterized protein	DSM only	1	0.0434352
Q8U5M0	Atu8121	Uncharacterized protein	3.70564	0	0.090846
Q8U5N2	Atu0260	Aldo-keto reductase	DRM only	0	0.298351
Q8U5S9	Atu5383	Transcriptional regulator, TetR family	DSM only	0	0.375751
Q8U642	dnaE2-3 Atu6093 AGR_pTi_175	Error-prone DNA polymerase 3 (EC 2.7.7.7)	DRM only	0	0.239293
Q8U705	argH2 Atu4651 AGR_L_463	Argininosuccinate lyase 2 (ASAL 2) (EC 4.3.2.1) (Arginosuccinase)	DSM only	0	0.188004
Q8U7G2	metN Atu4487 AGR_L_765	Methionine import ATP-binding protein MetN (EC 7.4.2.11)	1.2285	0	0.592254
Q8U7G6	xylA Atu4483 AGR_L_774	Xylose isomerase (EC 5.3.1.5)	0.726528	0	0.64576
Q8U7H5	gltX Atu4474 AGR_L_791	Glutamate--tRNA ligase (EC 6.1.1.17) (Glutamyl-tRNA synthetase) (GluRS)	0.197879	1	0.0152201
Q8U7H6	lysS Atu4473 AGR_L_794	Lysine--tRNA ligase (EC 6.1.1.6) (Lysyl-tRNA synthetase) (LysRS)	DRM only	0	0.0583425
Q8U7I5	tal talB Atu4464 AGR_L_812	Transaldolase (EC 2.2.1.2)	DSM only	0	0.100335
Q8U7P1	napA Atu4408 AGR_L_917	Periplasmic nitrate reductase (EC 1.9.6.1)	DRM only	0	0.221621
Q8U8I2	sdh Atu4110 AGR_L_1487	Serine 3-dehydrogenase (EC 1.1.1.276)	1.90764	0	0.231984
Q8U8I9	cmk Atu4103 AGR_L_1498	Cytidylate kinase (CK) (EC 2.7.4.25) (Cytidine monophosphate kinase) (CMP kinase)	DRM only	0	0.44773
Q8U8J3	nadA Atu4098 AGR_L_1511	Quinolinate synthase A (EC 2.5.1.72)	DRM only	1	0.0107721
Q8U8J4	nadB Atu4097 AGR_L_1513	L-aspartate oxidase (LASPO) (EC 1.4.3.16) (Quinolinate synthase B)	DRM only	0	0.183761
Q8U8L4	glgB Atu4077 AGR_L_1558	1,4-alpha-glucan branching enzyme GlgB (EC 2.4.1.18) (1,4-alpha-D-glucan:1,4-alpha-D-glucan 6-glucosyl-transferase) (Alpha-(1->4)-glucan branching enzyme) (Glycogen branching enzyme) (BE)	DRM only	0	0.235668
Q8U8L5	glgC Atu4076 AGR_L_1560	Glucose-1-phosphate adenylyltransferase (EC 2.7.7.27) (ADP-glucose pyrophosphorylase) (ADPGlc PPase) (ADP-glucose synthase)	DRM only	0	0.216439
Q8U8M6	rpsU1 Atu4064 AGR_L_1581	30S ribosomal protein S21 A	1.40579	0	0.342903
Q8U8R2	recX Atu4028 AGR_L_1649	Regulatory protein RecX	DSM only	0	0.111923
Q8U8T9	bioD Atu3999 AGR_L_1705	ATP-dependent dethiobiotin synthetase BioD (EC 6.3.3.3) (DTB synthetase) (DTBS) (Dethiobiotin synthase)	DRM only	0	0.14338
Q8U8Z9	hutU Atu3931 AGR_L_1830	Urocanate hydratase (Urocanase) (EC 4.2.1.49) (Imidazolonepropionate hydrolase)	DRM only	0	0.468299
Q8U919	Atu3911 AGR_L_1868	Putative hydro-lyase Atu3911 (EC 4.2.1.-)	DRM only	1	0.0189535
Q8U940	glpK Atu3890 AGR_L_1914	Glycerol kinase (EC 2.7.1.30) (ATP:glycerol 3-phosphotransferase) (Glycerokinase) (GK)	DSM only	0	0.760188
Q8U971	Atu3857	Uncharacterized protein	DRM only	0	0.183761
Q8U988	Atu3840	Uncharacterized protein	DRM only	0	0.183628
Q8U9D9	kdpB Atu3789 AGR_L_2090	Potassium-transporting ATPase ATP-binding subunit (EC 7.2.2.6) (ATP phosphohydrolase [potassium-transporting] B chain) (Potassium-binding and translocating subunit B) (Potassium-translocating ATPase B chain)	DSM only	0	0.343126
Q8U9F7	hemH Atu3771 AGR_L_2129	Ferrochelatase (EC 4.99.1.1) (Heme synthase) (Protoheme ferro-lyase)	DRM only	1	0.0487908
Q8U9F9	omp10 Atu3769 AGR_L_2135	Outer membrane lipoprotein omp10 homolog	DRM only	0	0.0593258
Q8U9I5	rpmE Atu3743 AGR_L_2181	50S ribosomal protein L31	0.159887	0	0.164101
Q8U9I9	pgk Atu3739 AGR_L_2193	Phosphoglycerate kinase (EC 2.7.2.3)	0.716806	0	0.253937
Q8U9K5	ruvA Atu3723 AGR_L_2223	Holliday junction ATP-dependent DNA helicase RuvA (EC 3.6.4.12)	DSM only	0	0.229038
Q8U9K6	ruvB Atu3722 AGR_L_2225	Holliday junction ATP-dependent DNA helicase RuvB (EC 3.6.4.12)	4.27561	1	0.00774547
Q8U9L4	tolB Atu3714 AGR_L_2244	Tol-Pal system protein TolB	0.327113	1	0.037148
Q8U9L5	pal omp16 palA Atu3713 AGR_L_2246	Peptidoglycan-associated lipoprotein (PAL) (Outer membrane lipoprotein Omp16 homolog)	15.7692	1	0.018168
Q8U9L9	glmM Atu3709 AGR_L_2256	Phosphoglucosamine mutase (EC 5.4.2.10)	DRM only	1	0.0110763
Q8U9N0	Atu3696	UPF0434 protein Atu3696	DSM only	0	0.183679
Q8U9T8	rpsU3 Atu3637 AGR_L_2379	30S ribosomal protein S21 3	0.681781	0	0.54185
Q8U9U5	accA Atu3630 AGR_L_2394	Acetyl-coenzyme A carboxylase carboxyl transferase subunit alpha (ACCase subunit alpha) (Acetyl-CoA carboxylase carboxyltransferase subunit alpha) (EC 2.1.3.15)	1.1385	0	0.760593
Q8U9V0	aroB Atu3625 AGR_L_2401	3-dehydroquinate synthase (DHQS) (EC 4.2.3.4)	DRM only	0	0.264178
Q8U9V8	rpmB Atu3617 AGR_L_2417.1	50S ribosomal protein L28	2.0472	1	0.00637984
Q8U9W1	gloB Atu3614 AGR_L_2423	Hydroxyacylglutathione hydrolase (EC 3.1.2.6) (Glyoxalase II) (Glx II)	DRM only	1	0.0226491
Q8U9W3	hisC Atu3612 AGR_L_2426	Histidinol-phosphate aminotransferase (EC 2.6.1.9) (Imidazole acetol-phosphate transaminase)	0.2679	0	0.184439
Q8U9X6	argH1 Atu3599 AGR_L_2457	Argininosuccinate lyase 1 (ASAL 1) (EC 4.3.2.1) (Arginosuccinase)	0.329794	0	0.273271
Q8UA46	uxuA2 Atu3529 AGR_L_2605	Mannonate dehydratase 2 (EC 4.2.1.8) (D-mannonate hydro-lyase 2)	0.673007	0	0.631663
Q8UA56	argJ Atu3518 AGR_L_2624	Arginine biosynthesis bifunctional protein ArgJ [Cleaved into: Arginine biosynthesis bifunctional protein ArgJ alpha chain; Arginine biosynthesis bifunctional protein ArgJ beta chain] [Includes: Glutamate N-acetyltransferase (EC 2.3.1.35) (Ornithine acetyltransferase) (OATase) (Ornithine transacetylase); Amino-acid acetyltransferase (EC 2.3.1.1) (N-acetylglutamate synthase) (AGSase)]	0.223421	1	0.0309235
Q8UA66	ubiG Atu3508 AGR_L_2640	Ubiquinone biosynthesis O-methyltransferase (2-polyprenyl-6-hydroxyphenol methylase) (EC 2.1.1.222) (3-demethylubiquinone 3-O-methyltransferase) (EC 2.1.1.64)	DRM only	1	0.0199504
Q8UA73	cysA2 Atu3501 AGR_L_2655	Sulfate/thiosulfate import ATP-binding protein CysA 2 (EC 7.3.2.3) (Sulfate-transporting ATPase 2)	2.01384	0	0.448647
Q8UA86	rbsA1 Atu3488 AGR_L_2683	Ribose import ATP-binding protein RbsA 1 (EC 7.5.2.7)	DSM only	0	0.50435
Q8UAA5	gpmI pgm Atu3469 AGR_L_2721	2,3-bisphosphoglycerate-independent phosphoglycerate mutase (BPG-independent PGAM) (Phosphoglyceromutase) (iPGM) (EC 5.4.2.12)	DRM only	0	0.371478
Q8UAA9	blh Atu3465 AGR_L_2726	Beta-lactamase hydrolase-like protein (BLH) (EC 3.-.-.-)	DRM only	0	0.18994
Q8UAD1	Atu3443	Uncharacterized protein	DRM only	0	0.183761
Q8UAK2	Atu3371 AGR_L_2903	Putative ribose/galactose/methyl galactoside import ATP-binding protein 2 (EC 7.5.2.11) (EC 7.5.2.7)	DRM only	0	0.18668
[truncated: 294 more rows]
